# Supplementary material for: Monomeric thorium chalcogenolates with bipyridine and terpyridine ligands
Source: Royal Society of Chemistry journal article supplement (doi:10.1039/c8dt02543f), 2018-01-01
Supplement: c8dt02543f1.pdf [file c8dt02543f1.pdf]

# Monomeric Thorium Chalcogenolates with Bipyridine and Terpyridine Ligands

**Marissa Ringgold, Wen Wu, Matthew Stuber, Anna Y. Kornienko, Thomas J. Emge and John G. Brennan\***

*Department of Chemistry and Chemical Biology, Rutgers, the State University of New Jersey, 610 Taylor Road, Piscataway NJ 08854-8087, United States*

\*Email: bren@rci.rutgers.edu

## Supporting Information (SI)

### Table of contents

|                                                                                                                                                                                                                                                                                                                                                                                                                                                         |      |
|---------------------------------------------------------------------------------------------------------------------------------------------------------------------------------------------------------------------------------------------------------------------------------------------------------------------------------------------------------------------------------------------------------------------------------------------------------|------|
| 1. X-ray powder diffraction profiles and the profiles of calculated diffraction patterns for (bipy) <sub>2</sub> Th(SPh) <sub>4</sub> , <b>1</b> , (bipy) <sub>2</sub> Th(SePh) <sub>4</sub> ·py, <b>2</b> , (bipy) <sub>2</sub> Th(SC <sub>6</sub> F <sub>5</sub> ) <sub>4</sub> · 2THF, <b>3</b> , (bipy) <sub>2</sub> Th(SeC <sub>6</sub> F <sub>5</sub> ) <sub>4</sub> · 2THF, <b>4</b> , and (py)(terpy)Th(SPh) <sub>4</sub> · 2py, <b>5</b> ..... | S2   |
| 2. <sup>1</sup> H NMR data for all five compounds.....                                                                                                                                                                                                                                                                                                                                                                                                  | S7   |
| 3. <sup>19</sup> F NMR data for compounds <b>3</b> and <b>4</b> .....                                                                                                                                                                                                                                                                                                                                                                                   | S13  |
| 4. <sup>77</sup> Se NMR for compounds <b>2</b> and <b>4</b> .....                                                                                                                                                                                                                                                                                                                                                                                       | S15  |
| 5. IR spectra for compounds <b>1</b> , <b>2</b> , <b>3</b> , <b>4</b> , and <b>5</b> .....                                                                                                                                                                                                                                                                                                                                                              | S16  |
| 6. Summary of Crystallographic Details for compounds <b>1-5</b> , Table S1.....                                                                                                                                                                                                                                                                                                                                                                         | S18  |
| 7. Crystallographic tables for compounds <b>1</b> (Tables S2-S8), <b>2</b> (Tables S9-S15), <b>3</b> (Tables S16-S22), <b>4</b> (Tables S23-S29), and <b>5</b> (Tables S30-S36).....                                                                                                                                                                                                                                                                    | S19  |
| 8. Crystal structure unit cell packing diagrams for <b>1</b> (Figure S22), <b>2</b> (Figure S23), <b>3</b> (Figure S24), and <b>5</b> (Figure S25 and S26).....                                                                                                                                                                                                                                                                                         | S146 |
| 9. Intra- and inter-molecular π...π interaction motifs for <b>1</b> (Figure S27), <b>2</b> (Figure S28), <b>3</b> (Figure S29), <b>4</b> (Figure S30), and <b>5</b> (Figure S31).....                                                                                                                                                                                                                                                                   | S151 |

1. X-ray powder diffraction profiles and the profiles of calculated diffraction patterns for  $(\text{bipy})_2\text{Th}(\text{SPh})_4$  (1),  $(\text{bipy})_2\text{Th}(\text{SePh})_4 \cdot \text{py}$  (2),  $(\text{bipy})_2\text{Th}(\text{SC}_6\text{F}_5)_4 \cdot 2\text{THF}$  (3), and  $(\text{bipy})_2\text{Th}(\text{SeC}_6\text{F}_5)_4 \cdot 2\text{THF}$  (4),  $(\text{py})(\text{terpy})\text{Th}(\text{SPh})_4 \cdot 2\text{py}$  (5).

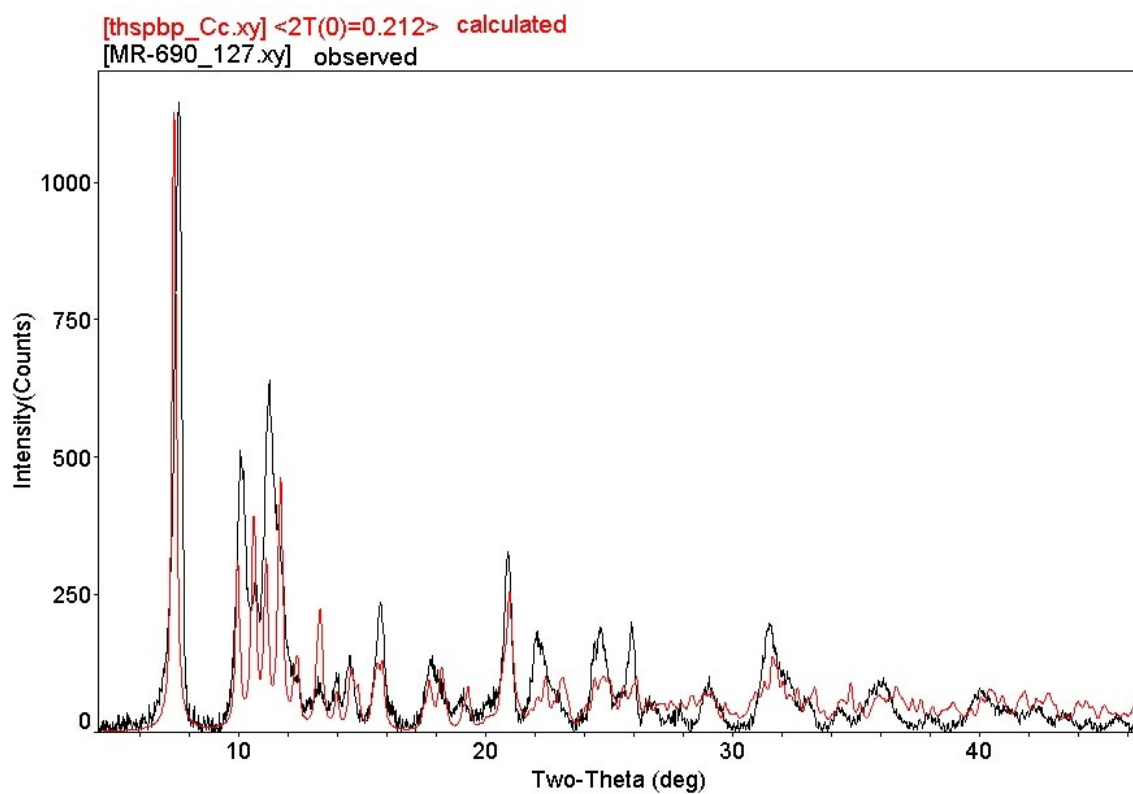

Figure S1. PXRD and calculated pattern from single crystal (in red) for  $(\text{bipy})_2\text{Th}(\text{SPh})_4$  (1).

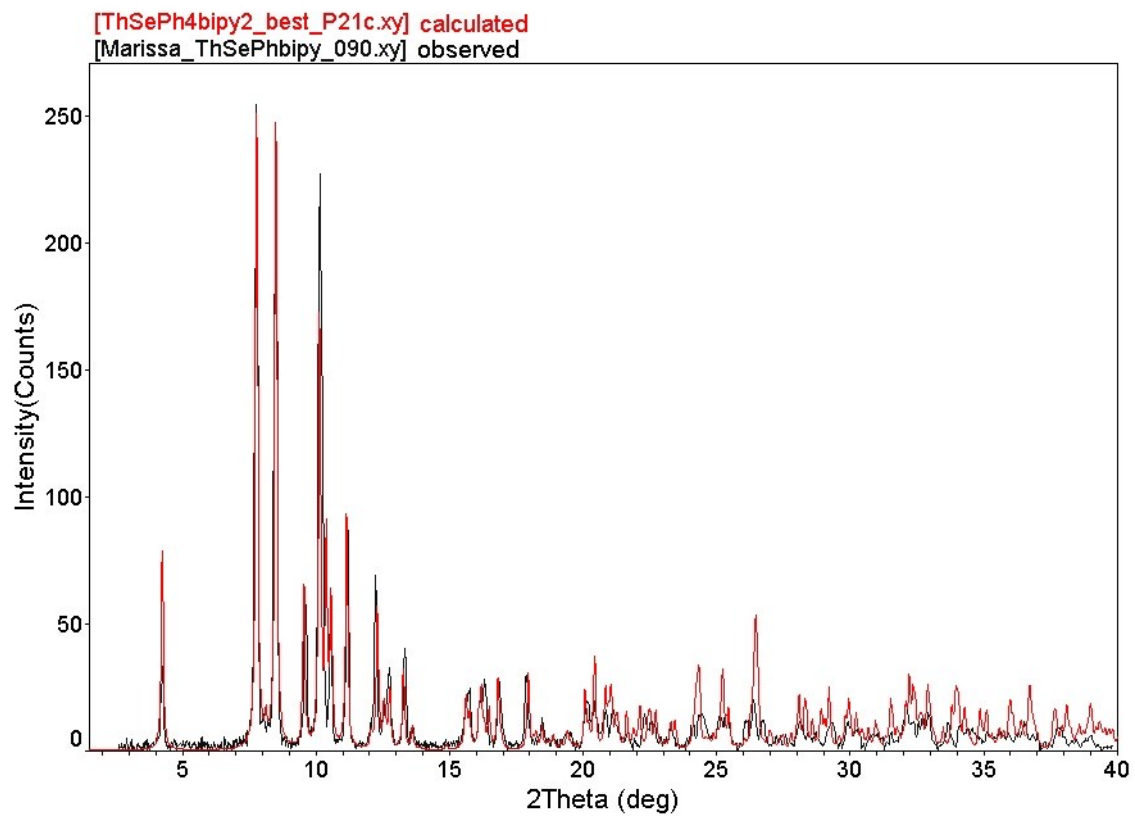

**Figure S2.** PXRD and calculated pattern from single crystal (in red) for **(bipy)<sub>2</sub>Th(SePh)<sub>4</sub>py (2)**.

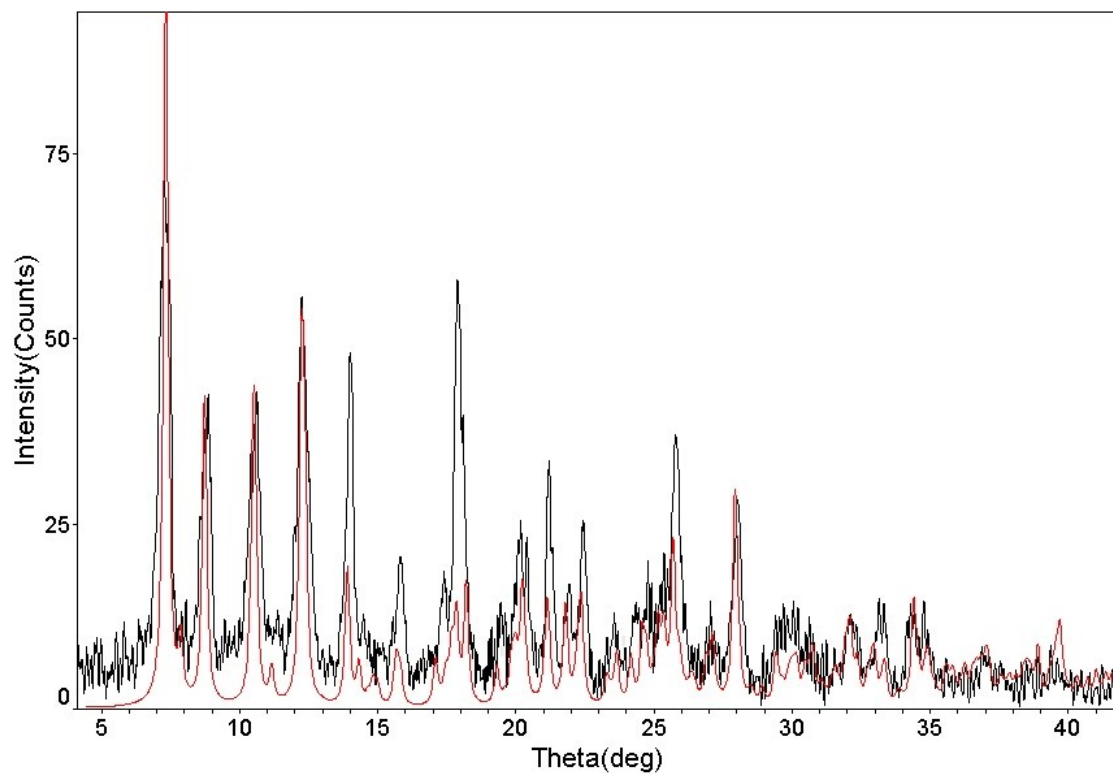

**Figure S3.** PXRD and calculated pattern from single crystal (in red) for **(bipy)<sub>2</sub>Th(SC<sub>6</sub>F<sub>5</sub>)<sub>4</sub>·2THF (3)**.

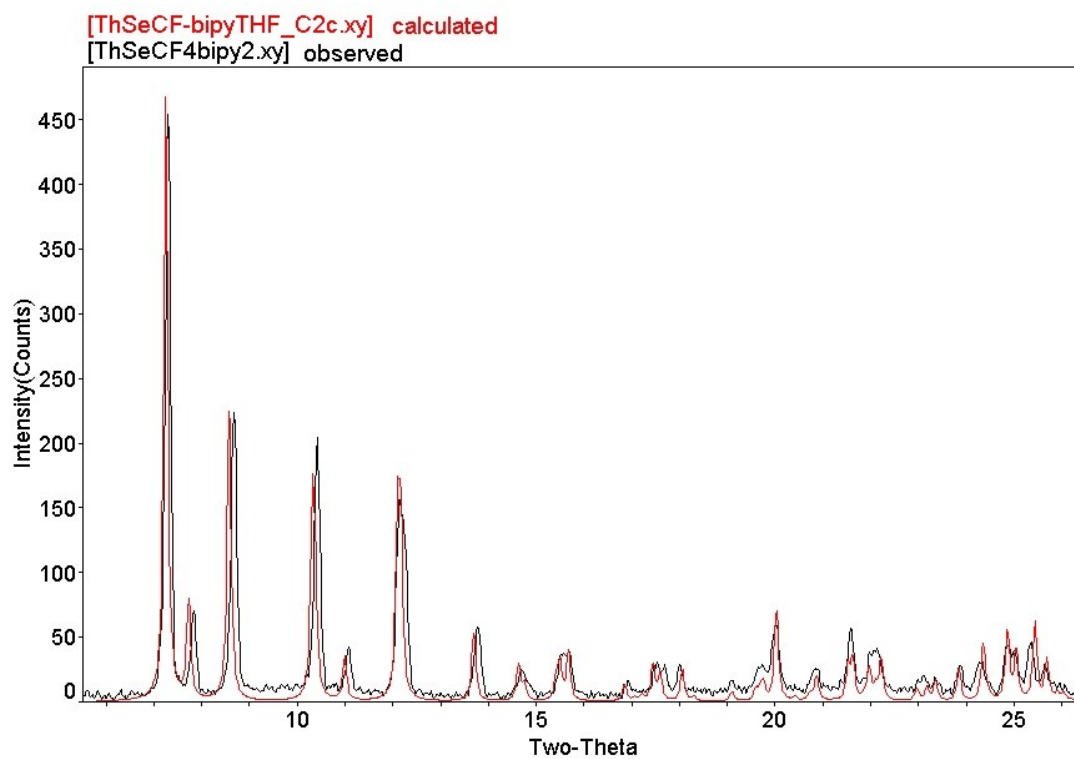

**Figure S4.** PXRD and calculated pattern from single crystal (in red) for **(bipy)<sub>2</sub>Th(SeC<sub>6</sub>F<sub>5</sub>)<sub>4</sub>·2THF (4)**.

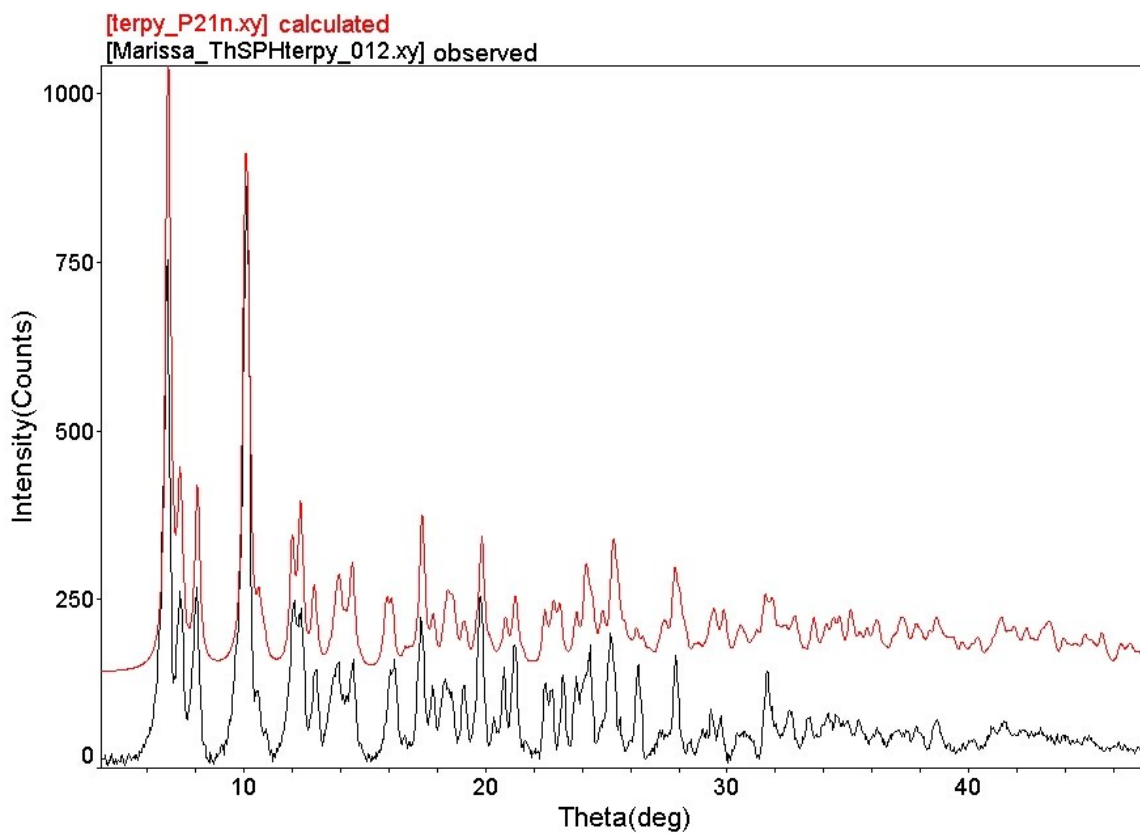

**Figure S5.** PXRD and calculated pattern from single crystal (in red) for  $(py)(terpy)Th(SPh)_4 \cdot 2py$  (**5**).

## 2. $^1\text{H}$ NMR data for all four compounds

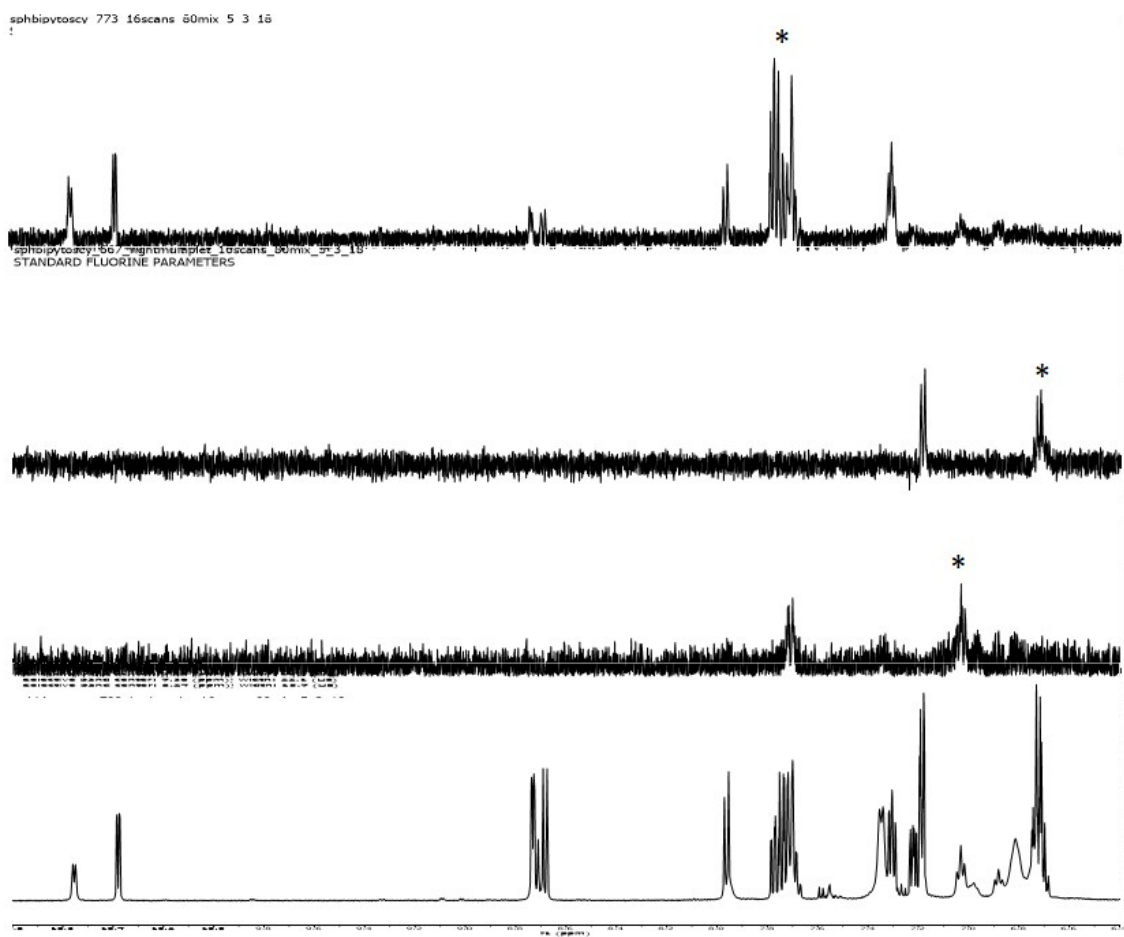

**Figure S6.**  $^1\text{H}$  NMR ( $\text{pyridine-}d_5$ ) spectrum of  $\text{Th}(\text{SPh})_4(\text{bipy})$  (1) (bottom) and 1D TOCSY experiments applied to the SPh (second and third spectra) and bipy (top) resonances respectively. (\* indicates excited peak)

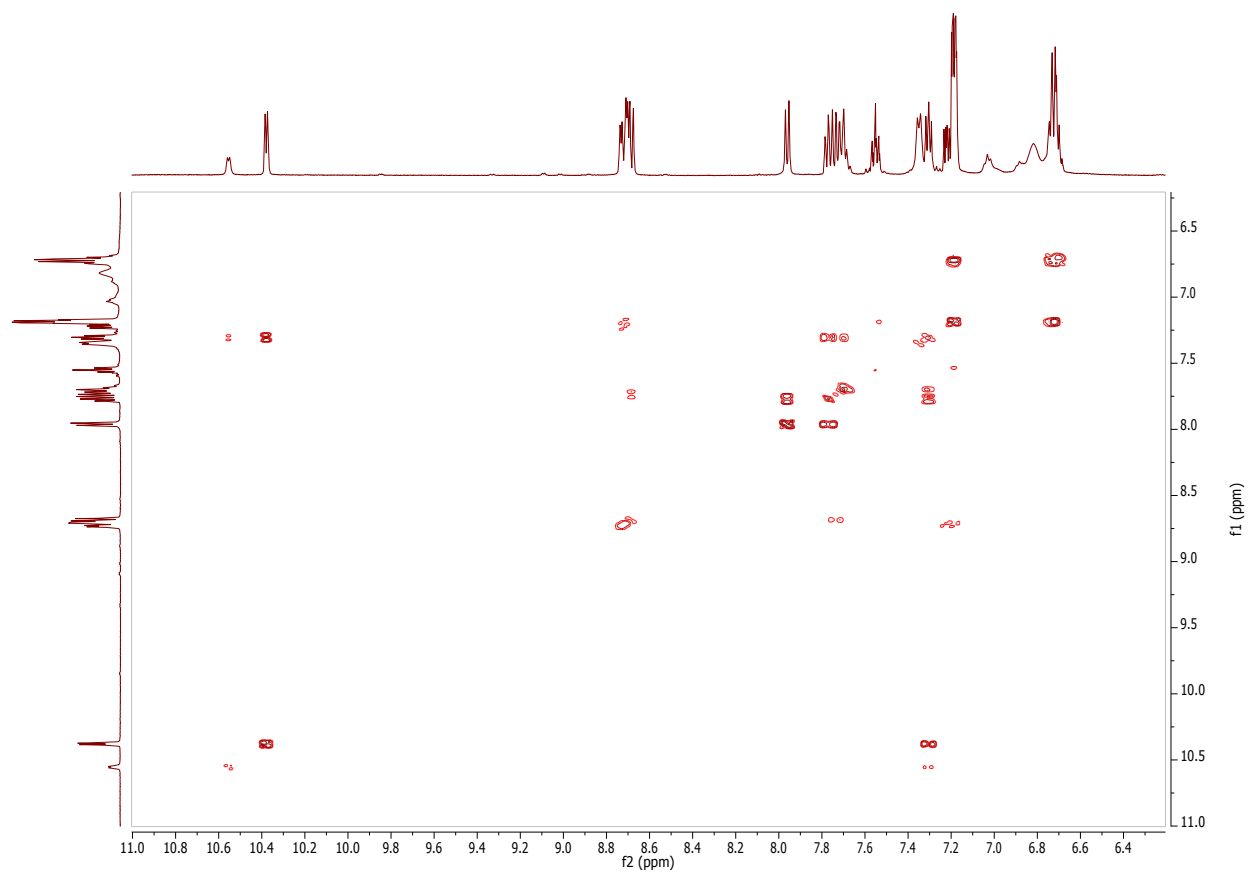

**Figure S7.** Two-dimensional  $^1\text{H}$ - $^1\text{H}$  correlation spectroscopy (COSY) NMR (pyridine- $d_5$ ) of **Th(SPh) $_4$ (bipy) (1)**.



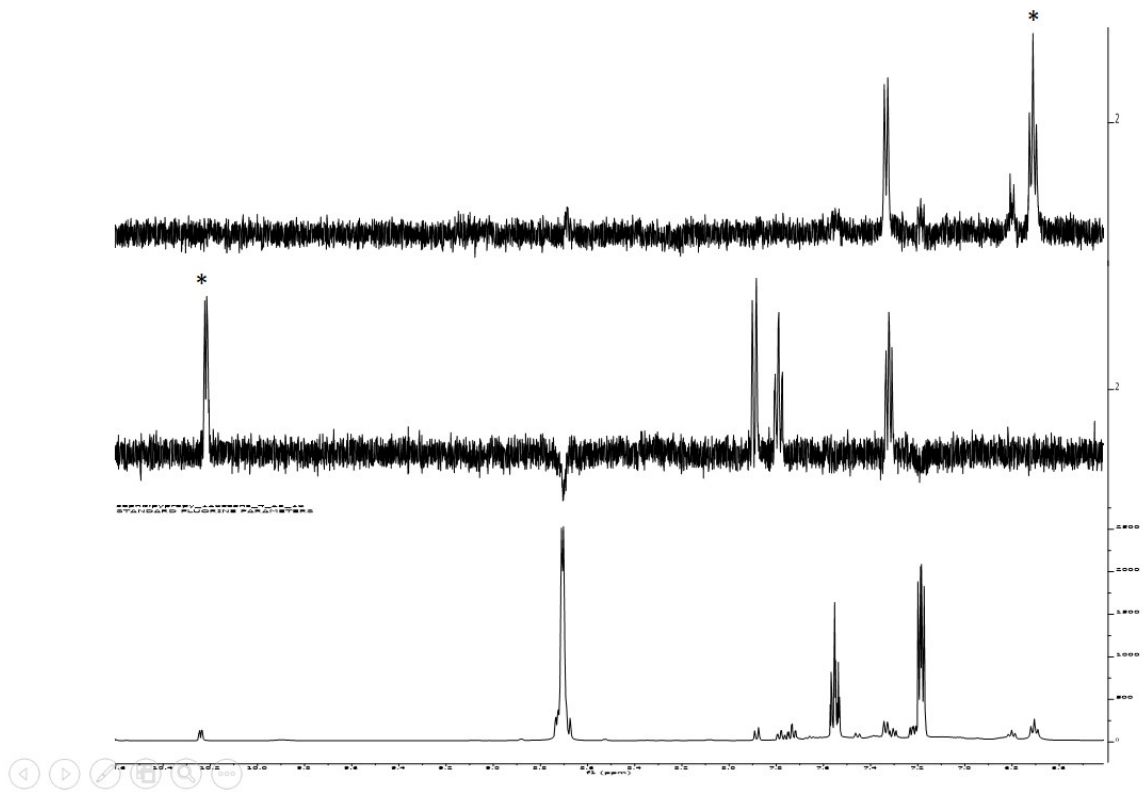

**Figure S8.**  $^1\text{H}$  NMR (pyridine-  $\text{d}_5$ ) spectrum of  $\text{Th}(\text{SePh})_4(\text{bipy})\cdot\text{Py}$  (**2**) (bottom) and 1D TOCSY experiments (top and middle) applied to the SePh and bipy resonances respectively.

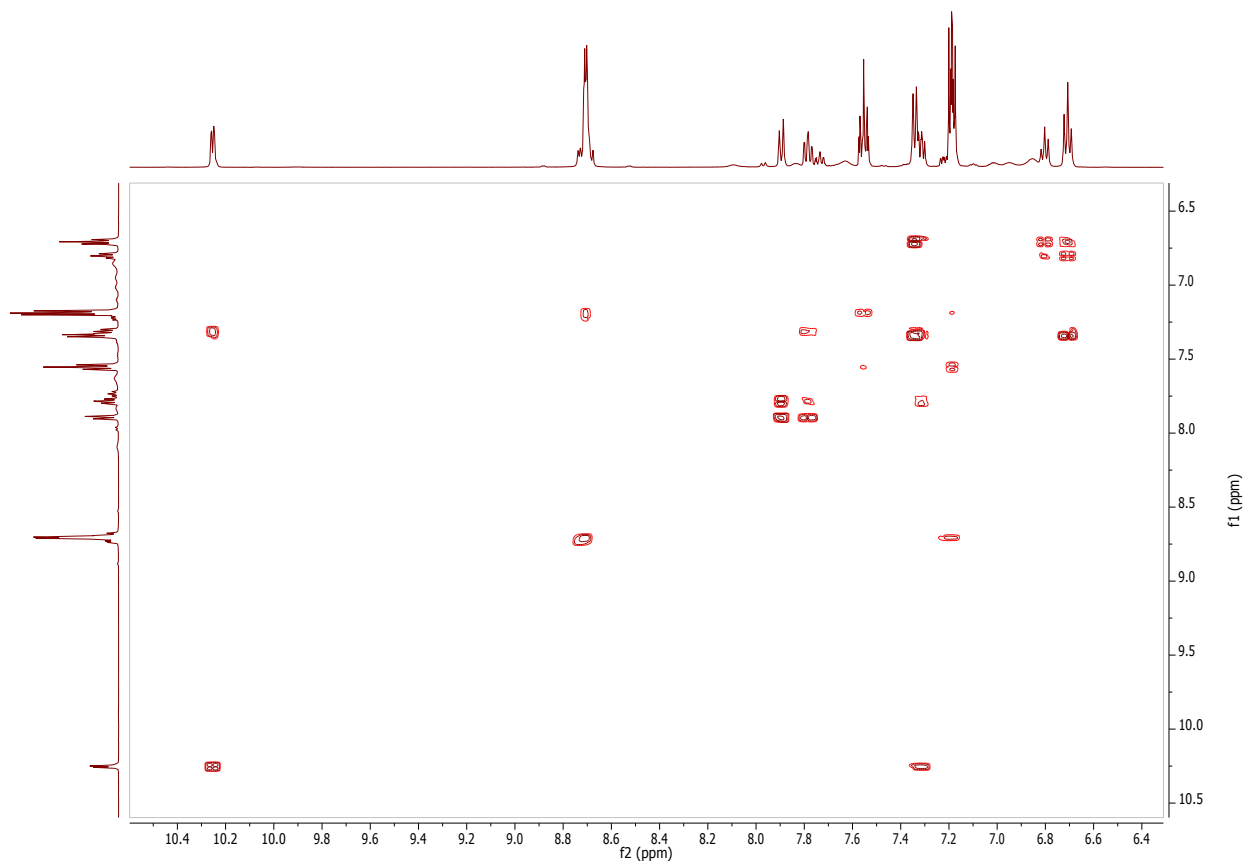

**Figure S9.** Two-dimensional  $^1\text{H}$ - $^1\text{H}$  correlation spectroscopy (COSY) NMR (pyridine-  $d_5$ ) of  $\text{Th}(\text{SePh})_4(\text{bipy})$  (**2**).

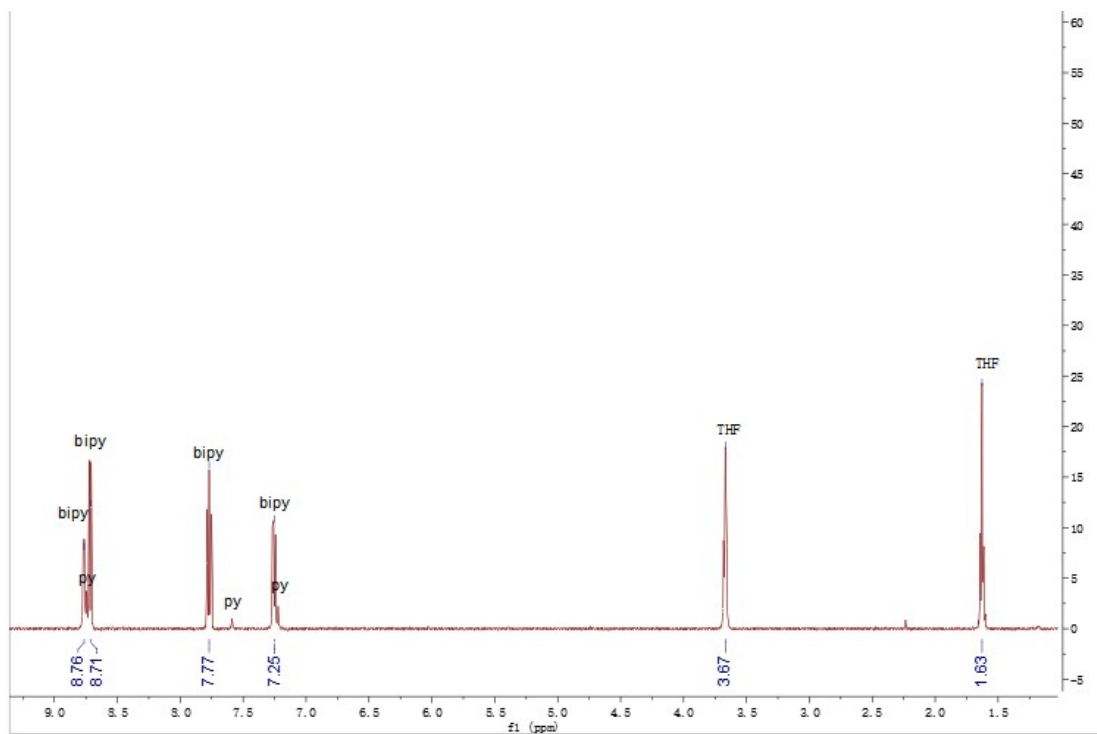

**Figure S10.**  $^1\text{H}$  NMR ( $\text{pyridine-}d_5$ ) spectrum of  $\text{Th}(\text{SC}_6\text{F}_5)_4(\text{bipy})_2$  (3).

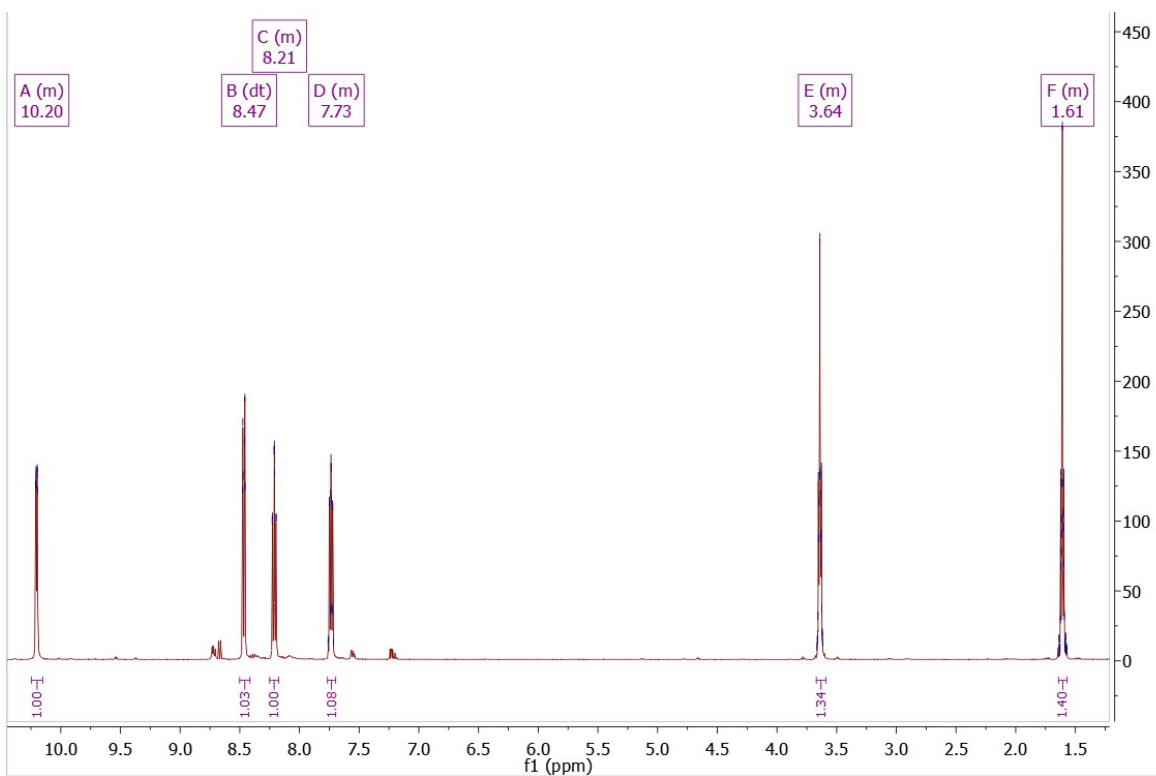

**Figure S11.**  $^1\text{H}$  NMR ( $\text{pyridine-}d_5$ ) spectrum of  $\text{Th}(\text{SeC}_6\text{F}_5)_4(\text{bipy})_2$  (4).

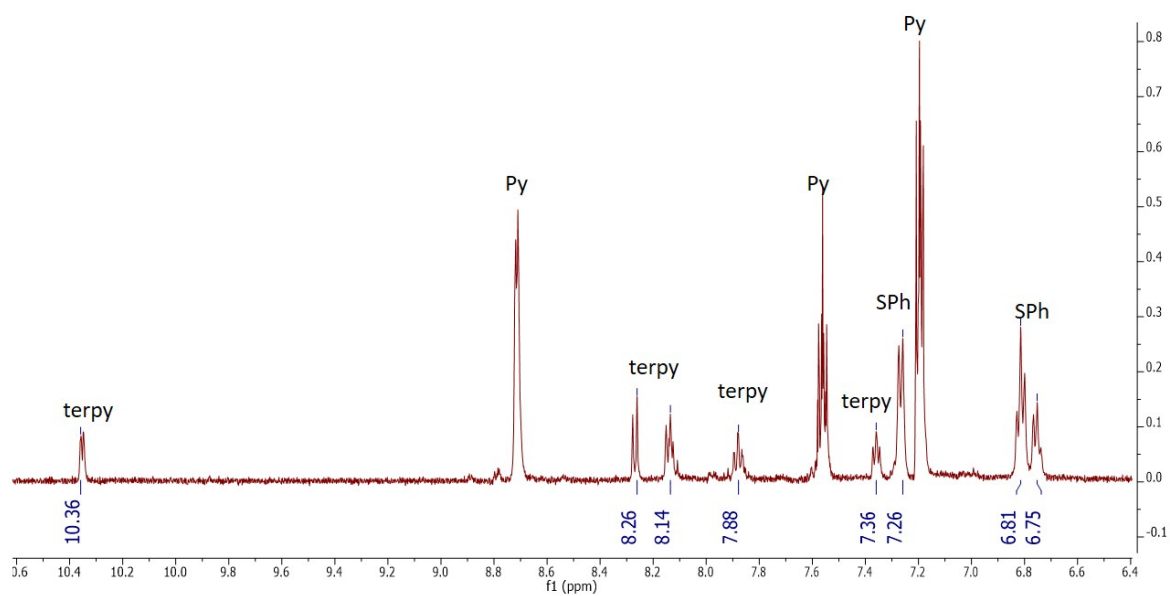

**Figure S12.** <sup>1</sup>H NMR (pyridine – d<sub>5</sub>) spectrum of **pyTh(SPh)<sub>4</sub>(terpy) (5)**.

3.  $^{19}\text{F}$  NMR data for compounds 3 and 4.

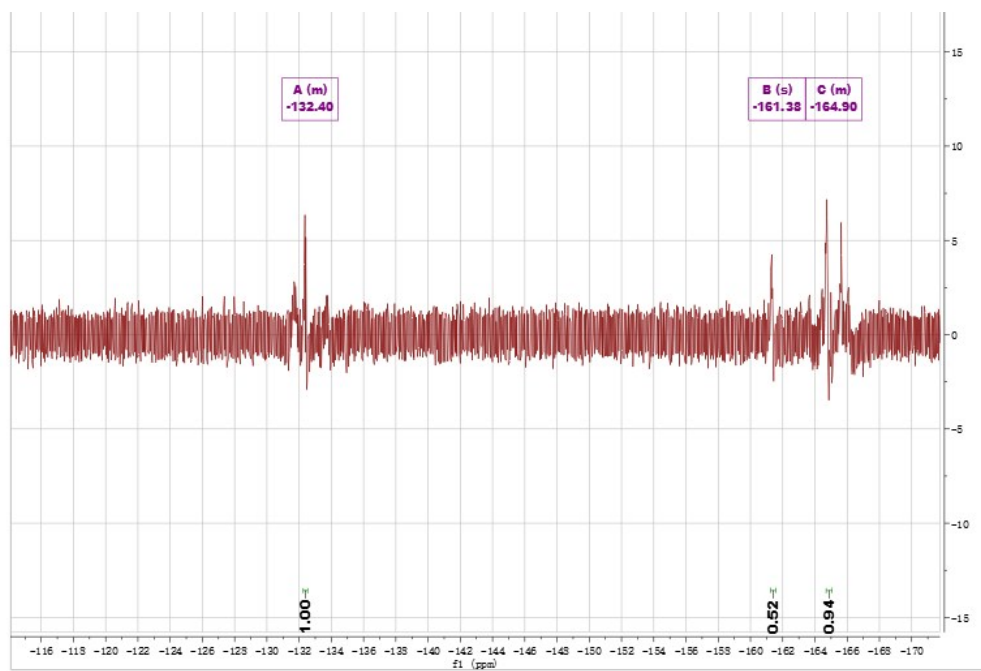

Figure S13.  $^{19}\text{F}$  NMR (pyridine –  $d_5$ ) spectrum of  $(\text{bipy})_2\text{Th}(\text{SC}_6\text{F}_5)_4$  (3).

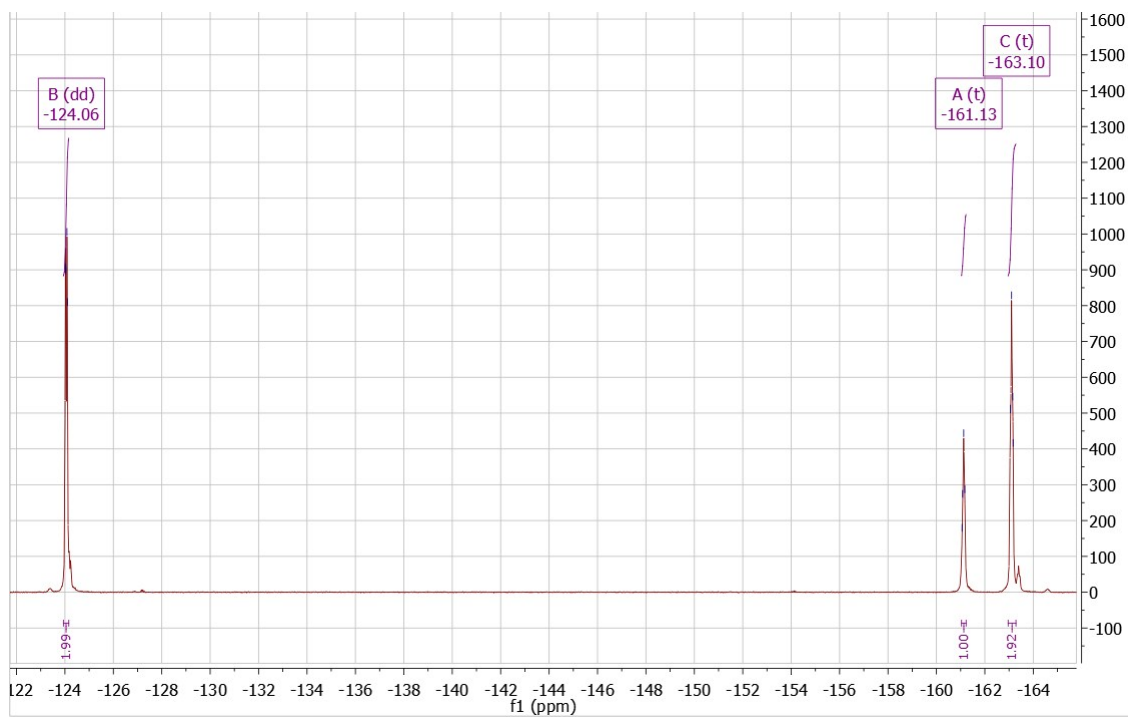

Figure S14.  $^{19}\text{F}$  NMR (pyridine –  $d_5$ ) spectrum of  $(\text{bipy})_2\text{Th}(\text{SeC}_6\text{F}_5)_4$  (4).

4.  $^{77}\text{Se}$  NMR for compounds 2 and 4.

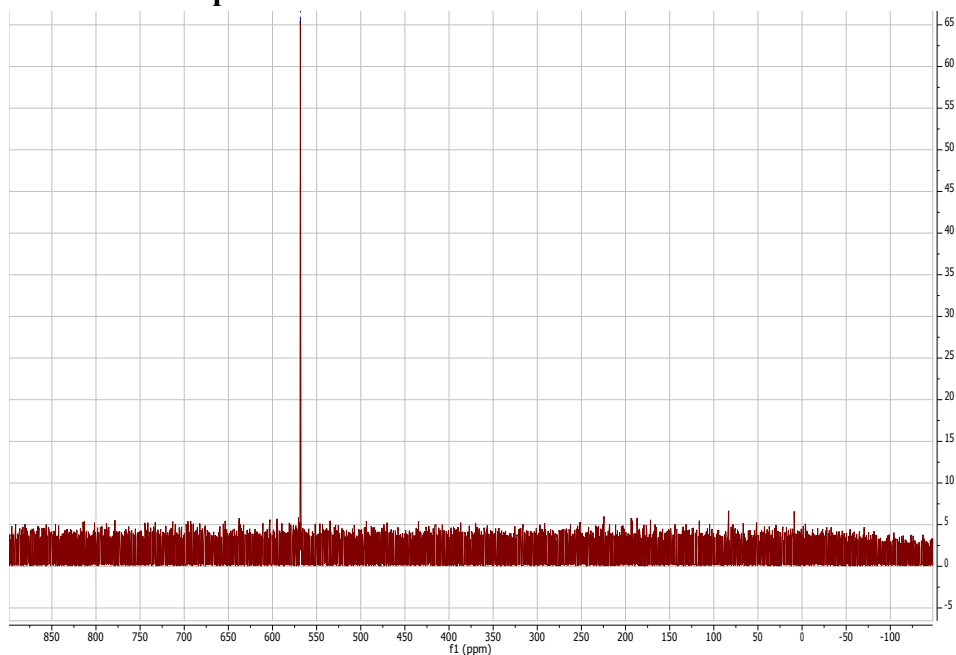

Figure S15.  $^{77}\text{Se}$  NMR (toluene -  $d_8$ ) spectrum of  $\text{Th}(\text{SePh})_4(\text{bipy})\cdot\text{Py}$  (2).

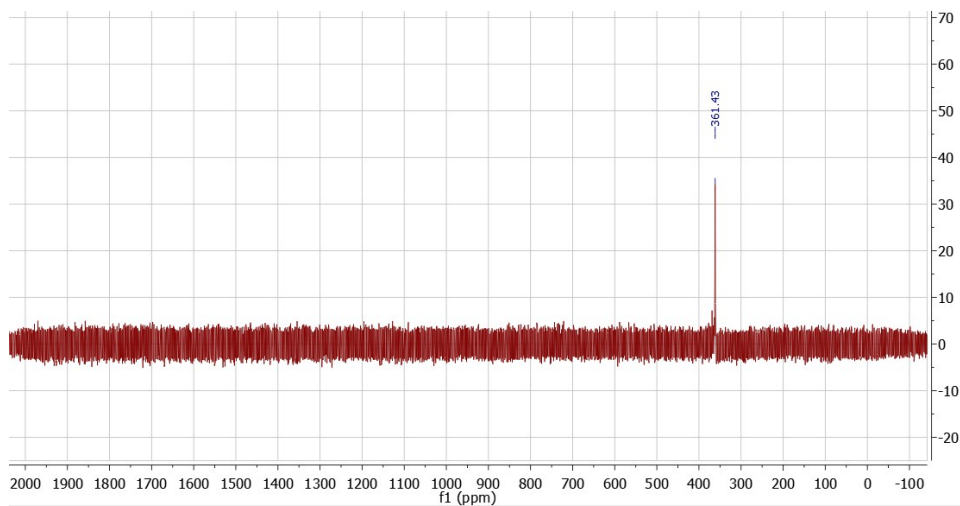

Figure S16.  $^{77}\text{Se}$  NMR (pyridine -  $d_5$ ) spectrum of  $(\text{bipy})_2\text{Th}(\text{SeC}_6\text{F}_5)_4$  (4).

## 5. IR Spectra for compounds 1, 2, 3, 4, and 5.

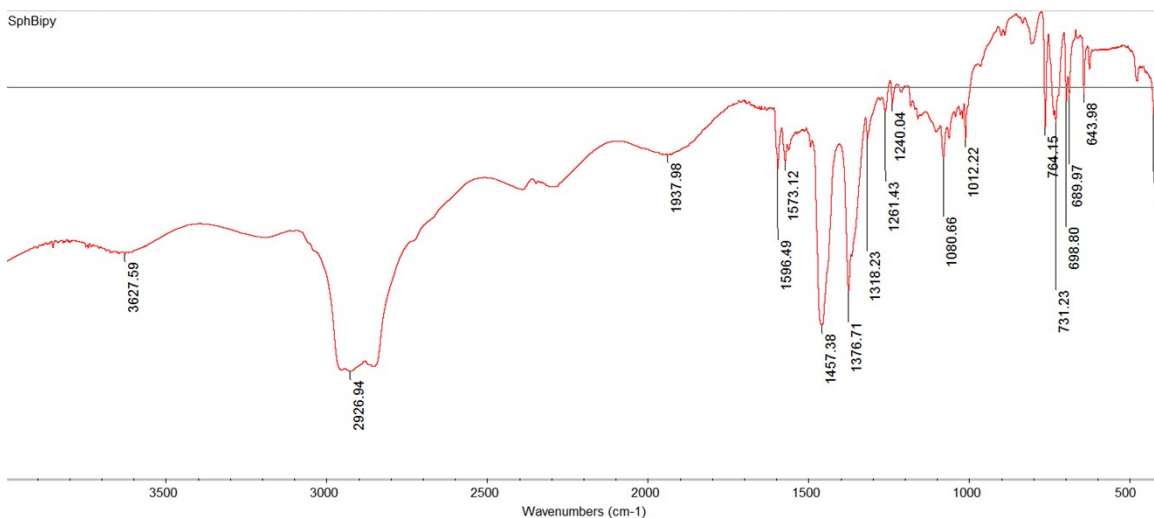

Figure S17. IR spectrum for (bipy)<sub>2</sub>Th(SPh)<sub>4</sub> (1).

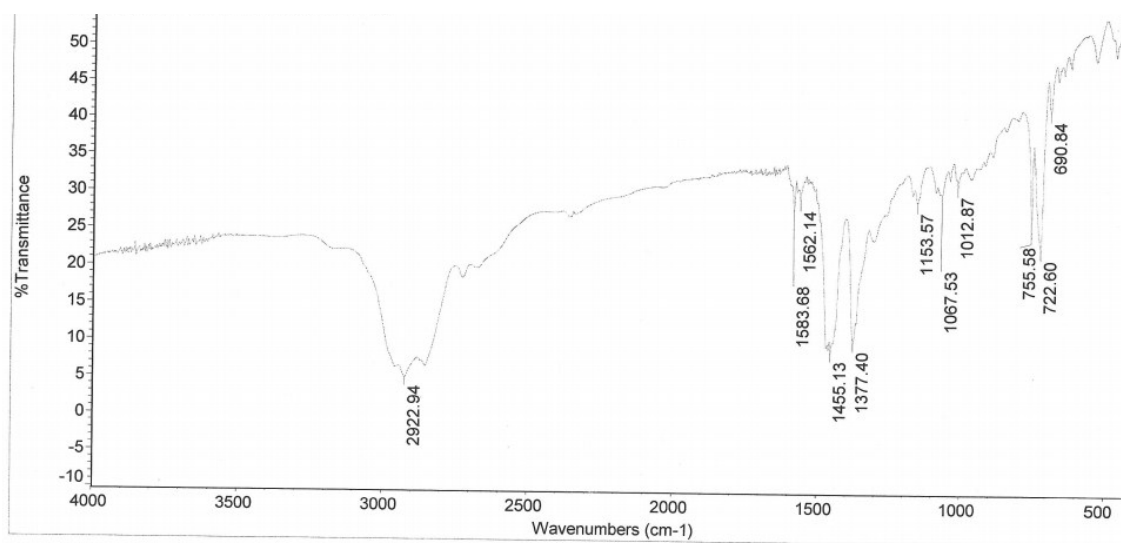

Figure S18. IR spectrum for Th(SePh)<sub>4</sub>(bipy)·Py (2).

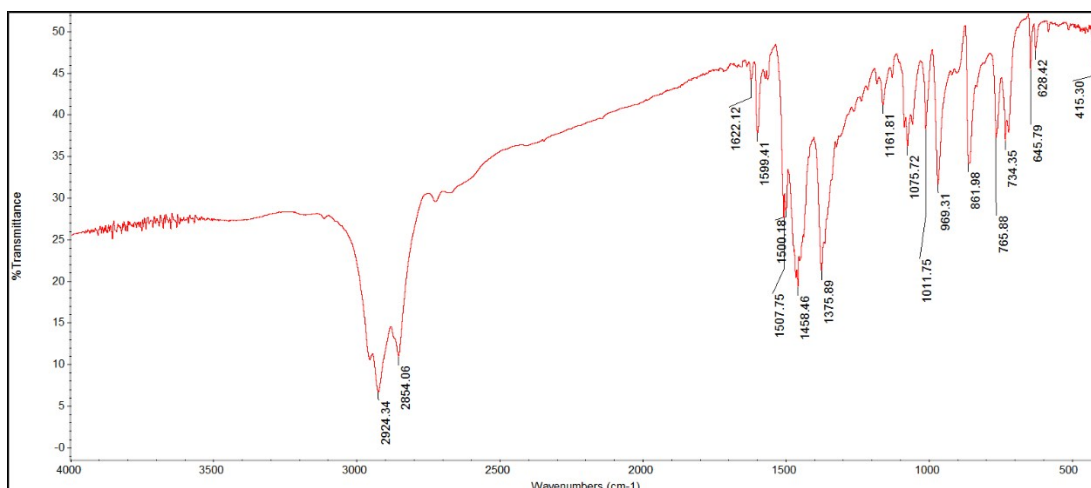

**Figure S19.** IR spectrum for  $(\text{bipy})_2\text{Th}(\text{SC}_6\text{F}_5)_4$  (**3**).

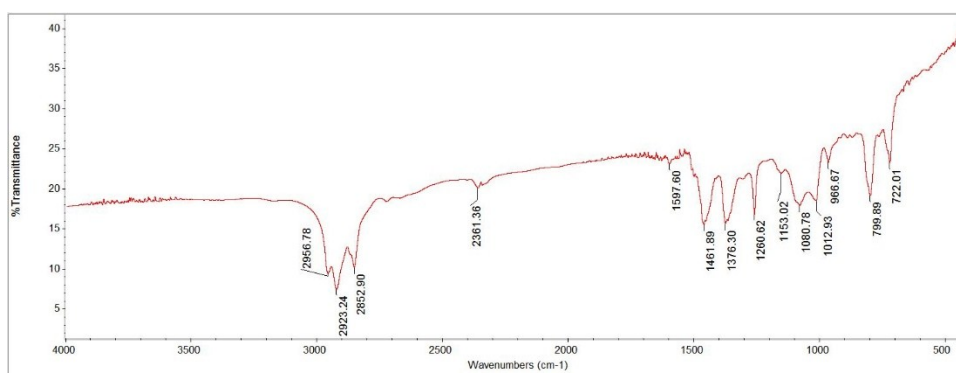

**Figure S20.** IR spectrum for  $(\text{bipy})_2\text{Th}(\text{SeC}_6\text{F}_5)_4$  (**4**).



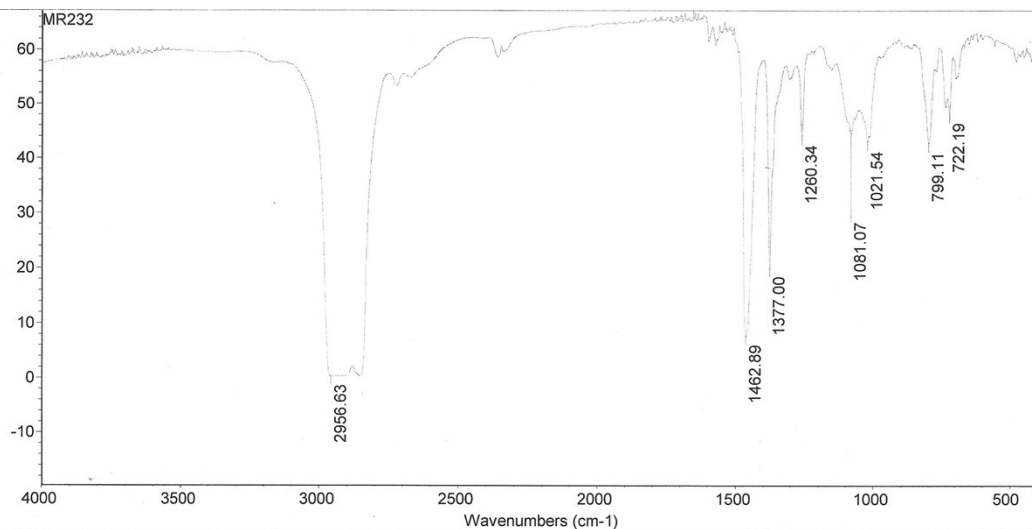

**Figure S21.** IR spectrum for **(py)(terpy)Th(SPh)<sub>4</sub> (5)**.

## 6. Summary of Crystallographic Details for compounds 1- 5, Table S1.

**Table S1.** Summary of Crystallographic Details for compounds 1-5

|                          | <b>1</b>                                                         | <b>2</b>                                                                      | <b>3</b>                                                                                              | <b>4</b>                                                                                                | <b>5</b>                                                              |
|--------------------------|------------------------------------------------------------------|-------------------------------------------------------------------------------|-------------------------------------------------------------------------------------------------------|---------------------------------------------------------------------------------------------------------|-----------------------------------------------------------------------|
|                          | <b>(bipy)<sub>2</sub>Th(SPh)<sub>4</sub></b><br><b>E = S</b>     | <b>(bipy)<sub>2</sub>Th(SePh)<sub>4</sub></b><br><b>· py</b><br><b>E = Se</b> | <b>(bipy)<sub>2</sub>Th(SC<sub>6</sub>F<sub>5</sub>)<sub>4</sub></b><br><b>· 2THF</b><br><b>E = S</b> | <b>(bipy)<sub>2</sub>Th(SeC<sub>6</sub>F<sub>5</sub>)<sub>4</sub></b><br><b>· 2THF</b><br><b>E = Se</b> | <b>(py)(terpy)Th(SPh)<sub>4</sub></b><br><b>· 2py</b><br><b>E = S</b> |
| empirical formula        | C <sub>44</sub> H <sub>36</sub> N <sub>4</sub> S <sub>4</sub> Th | C <sub>49</sub> H <sub>41</sub> N <sub>5</sub> Se <sub>4</sub> Th             | C <sub>52</sub> H <sub>32</sub> F <sub>20</sub> N <sub>4</sub> O <sub>2</sub> S <sub>4</sub> Th       | C <sub>52</sub> H <sub>32</sub> F <sub>20</sub> N <sub>4</sub> O <sub>2</sub> Se <sub>4</sub> Th        | C <sub>54</sub> H <sub>46</sub> N <sub>6</sub> S <sub>4</sub> Th      |
| fw                       | 981.05                                                           | 1247.75                                                                       | 1485.09                                                                                               | 1672.69                                                                                                 | 1139.25                                                               |
| crystal system           | monoclinic                                                       | monoclinic                                                                    | monoclinic                                                                                            | monoclinic                                                                                              | monoclinic                                                            |
| space group <sup>a</sup> | Cc                                                               | P2 <sub>1</sub> /c                                                            | C2/c                                                                                                  | C2/c                                                                                                    | P2 <sub>1</sub> /n                                                    |
| a (Å)                    | 25.426(1)                                                        | 20.895(2)                                                                     | 26.247(1)                                                                                             | 26.340(1)                                                                                               | 15.188(1)                                                             |
| b (Å)                    | 25.274(1)                                                        | 9.473(1)                                                                      | 12.598(1)                                                                                             | 12.750(1)                                                                                               | 21.632(1)                                                             |

|                                                                    |              |              |             |             |              |
|--------------------------------------------------------------------|--------------|--------------|-------------|-------------|--------------|
| c (Å)                                                              | 24.336(1)    | 22.825(3)    | 17.213(1)   | 17.396(1)   | 15.651(1)    |
| $\beta$ (deg)                                                      | 90.948(2)    | 100.916(1)   | 114.189(1)  | 114.296(1)  | 111.146(1)   |
| V (Å <sup>3</sup> )                                                | 15636.8(13)  | 4434.5(9)    | 5191.9(4)   | 5324.7(4)   | 4795.8(5)    |
| Z                                                                  | 16           | 4            | 4           | 4           | 4            |
| D <sub>calc</sub> (Mg/cm <sup>3</sup> )                            | 1.667        | 1.869        | 1.900       | 2.087       | 1.578        |
| T (K)                                                              | 100(2)       | 100(2)       | 100(2)      | 100(2)      | 100(2)       |
| abs coeff (mm <sup>-1</sup> )                                      | 4.066        | 6.686        | 3.153       | 5.652       | 3.328        |
| R(int)/N <sub>unique</sub>                                         | 0.0879/28537 | 0.0586/10170 | 0.0412/7926 | 0.0357/8110 | 0.0398/13310 |
| R(F) <sup>b</sup> [I > 2 $\sigma$ (I)]                             | 0.0522       | 0.0404       | 0.0290      | 0.0271      | 0.0371       |
| R <sub>w</sub> (F <sup>2</sup> ) <sup>c</sup> [I > 2 $\sigma$ (I)] | 0.1175       | 0.0879       | 0.0643      | 0.0605      | 0.0733       |
| CCDC number                                                        | 1841858      | 1841859      | 1841860     | 1841861     | 1841862      |

<sup>a</sup> Crystal sample for **1** was twinned and absolute structure parameter (Flack) was refined to 0.508(11). Crystal sample for **2** had additional, weaker, and non-overlapping reflections that were consistent with both twinning and an approximate (2**a**,**b**,**c**) supercell, with respect to the unit cell for **2** used here, and were subsequently ignored.

$$^b R(F) = \frac{\sum |F_o| - |F_c|}{\sum |F_o|}$$

$$^c R_w(F^2) = \left\{ \frac{\sum [w(F_o^2 - F_c^2)^2]}{\sum [w(F_o^2)^2]} \right\}^{1/2}$$

**7. Crystallographic tables for compounds 1 (Tables S2-S8), 2 (Tables S9-S15), 2a (Tables S16-S22), 3 (Tables S23-S29), 4 (Tables S30-S36), and 5 (Tables S37-S43).**

**Table S2.** Crystal data and structure refinement for 1.

|                                   |                                                                  |                   |
|-----------------------------------|------------------------------------------------------------------|-------------------|
| Identification code               | thsph4bipy2_final_xstl1_Cc                                       |                   |
| Empirical formula                 | C <sub>44</sub> H <sub>36</sub> N <sub>4</sub> S <sub>4</sub> Th |                   |
| Formula weight                    | 981.05                                                           |                   |
| Temperature                       | 100(2) K                                                         |                   |
| Wavelength                        | 0.71073 Å                                                        |                   |
| Crystal system                    | Monoclinic                                                       |                   |
| Space group                       | Cc                                                               |                   |
| Unit cell dimensions              | a = 25.4257(12) Å                                                | α = 90°.          |
|                                   | b = 25.2741(12) Å                                                | β = 90.9478(16)°. |
|                                   | c = 24.3365(12) Å                                                | γ = 90°.          |
| Volume                            | 15636.8(13) Å <sup>3</sup>                                       |                   |
| Z                                 | 16                                                               |                   |
| Density (calculated)              | 1.667 Mg/m <sup>3</sup>                                          |                   |
| Absorption coefficient            | 4.066 mm <sup>-1</sup>                                           |                   |
| F(000)                            | 7712                                                             |                   |
| Crystal size                      | .16 x .16 x .016 mm <sup>3</sup>                                 |                   |
| Theta range for data collection   | 1.136 to 25.409°.                                                |                   |
| Index ranges                      | -30 ≤ h ≤ 30, -30 ≤ k ≤ 30, -29 ≤ l ≤ 29                         |                   |
| Reflections collected             | 65333                                                            |                   |
| Independent reflections           | 28537 [R(int) = 0.0879]                                          |                   |
| Completeness to theta = 25.242°   | 99.9 %                                                           |                   |
| Absorption correction             | Semi-empirical from equivalents                                  |                   |
| Max. and min. transmission        | 0.0921 and 0.0622                                                |                   |
| Refinement method                 | Full-matrix least-squares on F <sup>2</sup>                      |                   |
| Data / restraints / parameters    | 28537 / 3948 / 1911                                              |                   |
| Goodness-of-fit on F <sup>2</sup> | 0.958                                                            |                   |
| Final R indices [I > 2σ(I)]       | R1 = 0.0522, wR2 = 0.1002                                        |                   |
| R indices (all data)              | R1 = 0.0957, wR2 = 0.1175                                        |                   |
| Absolute structure parameter      | 0.508(11)                                                        |                   |
| Extinction coefficient            | n/a                                                              |                   |
| Largest diff. peak and hole       | 0.985 and -1.106 e.Å <sup>-3</sup>                               |                   |

**Table S3.** Atomic coordinates ( $\times 10^4$ ) and equivalent isotropic displacement parameters ( $\text{\AA}^2 \times 10^3$ ) for **1**. U(eq) is defined as one third of the trace of the orthogonalized  $U^{ij}$  tensor.

|       | x        | y       | z        | U(eq) |
|-------|----------|---------|----------|-------|
| Th(1) | -2949(1) | 3924(1) | 18(2)    | 14(1) |
| S(1)  | -4006(2) | 3842(1) | -390(2)  | 18(1) |
| S(2)  | -3025(2) | 2870(1) | 435(2)   | 20(1) |
| S(3)  | -2334(2) | 4111(2) | 980(2)   | 21(1) |
| S(4)  | -2782(2) | 4535(1) | -942(2)  | 22(1) |
| N(1)  | -3689(2) | 4184(1) | 719(2)   | 15(3) |
| N(2)  | -3095(2) | 4945(1) | 250(2)   | 17(3) |
| N(3)  | -1933(2) | 3774(1) | -235(2)  | 14(3) |
| N(4)  | -2714(2) | 3164(1) | -673(2)  | 18(3) |
| C(1)  | -4140(3) | 3750(3) | -1101(2) | 19(4) |
| C(2)  | -4421(8) | 3298(5) | -1269(3) | 28(4) |
| C(3)  | -4584(8) | 3222(6) | -1816(4) | 32(4) |
| C(4)  | -4439(8) | 3618(6) | -2210(3) | 29(4) |
| C(5)  | -4206(8) | 4062(5) | -2054(3) | 25(4) |
| C(6)  | -4029(7) | 4134(5) | -1500(3) | 21(4) |
| C(7)  | -3124(3) | 2729(2) | 1144(2)  | 19(4) |
| C(8)  | -3585(4) | 2452(7) | 1280(3)  | 19(4) |
| C(9)  | -3657(5) | 2309(7) | 1825(3)  | 20(4) |
| C(10) | -3291(6) | 2429(8) | 2228(3)  | 25(4) |
| C(11) | -2835(6) | 2704(8) | 2096(3)  | 24(4) |
| C(12) | -2759(5) | 2842(7) | 1554(3)  | 23(4) |
| C(13) | -2648(3) | 4483(2) | 1498(2)  | 23(4) |
| C(14) | -2566(8) | 5019(3) | 1567(6)  | 30(4) |
| C(15) | -2784(8) | 5294(4) | 2009(6)  | 31(4) |
| C(16) | -3081(8) | 5035(5) | 2388(6)  | 31(4) |
| C(17) | -3165(7) | 4497(5) | 2334(5)  | 29(4) |
| C(18) | -2970(6) | 4220(4) | 1890(5)  | 26(4) |
| C(19) | -2435(3) | 4187(2) | -1457(2) | 21(4) |
| C(20) | -1922(3) | 4334(6) | -1568(6) | 24(4) |
| C(21) | -1653(4) | 4079(7) | -1985(6) | 29(4) |
| C(22) | -1896(5) | 3708(7) | -2300(6) | 28(4) |

|       |          |         |          |       |
|-------|----------|---------|----------|-------|
| C(23) | -2408(5) | 3541(6) | -2189(6) | 27(4) |
| C(24) | -2679(4) | 3803(6) | -1789(6) | 22(4) |
| C(25) | -3984(5) | 3800(2) | 943(6)   | 23(4) |
| C(26) | -4401(5) | 3899(2) | 1241(8)  | 26(4) |
| C(27) | -4577(5) | 4405(3) | 1317(8)  | 23(4) |
| C(28) | -4282(5) | 4830(2) | 1102(8)  | 23(4) |
| C(29) | -3825(4) | 4687(1) | 814(6)   | 17(3) |
| C(30) | -3490(4) | 5120(1) | 582(6)   | 17(3) |
| C(31) | -3541(5) | 5645(2) | 720(7)   | 19(4) |
| C(32) | -3189(5) | 6006(1) | 511(7)   | 25(4) |
| C(33) | -2774(5) | 5839(2) | 202(7)   | 23(4) |
| C(34) | -2735(5) | 5303(1) | 84(7)    | 19(4) |
| C(35) | -1574(2) | 4132(4) | -72(7)   | 17(4) |
| C(36) | -1047(2) | 4098(5) | -225(7)  | 20(4) |
| C(37) | -897(2)  | 3701(5) | -545(7)  | 20(4) |
| C(38) | -1270(2) | 3331(5) | -731(7)  | 19(4) |
| C(39) | -1799(2) | 3380(4) | -581(6)  | 16(3) |
| C(40) | -2217(2) | 3033(4) | -783(6)  | 18(3) |
| C(41) | -2089(3) | 2576(4) | -1090(7) | 20(4) |
| C(42) | -2506(3) | 2268(5) | -1289(8) | 21(4) |
| C(43) | -3026(3) | 2410(5) | -1186(8) | 23(4) |
| C(44) | -3098(2) | 2855(4) | -874(6)  | 20(4) |
| Th(2) | -467(1)  | 6424(1) | 19(2)    | 15(1) |
| S(5)  | -1509(2) | 6328(1) | -417(2)  | 19(1) |
| S(6)  | -537(2)  | 5368(1) | 437(2)   | 18(1) |
| S(7)  | 127(2)   | 6621(1) | 989(2)   | 22(1) |
| S(8)  | -285(2)  | 7033(1) | -941(2)  | 22(1) |
| N(5)  | -1215(2) | 6684(1) | 707(2)   | 16(3) |
| N(6)  | -608(2)  | 7440(1) | 270(2)   | 20(3) |
| N(7)  | 537(2)   | 6282(1) | -222(2)  | 19(3) |
| N(8)  | -218(2)  | 5654(1) | -669(2)  | 16(3) |
| C(45) | -1621(3) | 6270(3) | -1132(2) | 20(4) |
| C(46) | -1866(7) | 5807(4) | -1342(3) | 21(4) |
| C(47) | -2000(8) | 5779(5) | -1901(3) | 27(4) |
| C(48) | -1899(9) | 6190(5) | -2253(3) | 25(4) |
| C(49) | -1690(8) | 6639(5) | -2052(3) | 26(4) |

|       |          |         |          |       |
|-------|----------|---------|----------|-------|
| C(50) | -1541(8) | 6691(4) | -1505(3) | 22(4) |
| C(51) | -626(3)  | 5249(2) | 1152(2)  | 20(4) |
| C(52) | -1083(4) | 4971(7) | 1310(3)  | 21(4) |
| C(53) | -1155(6) | 4841(8) | 1857(3)  | 30(4) |
| C(54) | -786(6)  | 4966(8) | 2241(3)  | 30(4) |
| C(55) | -328(6)  | 5246(9) | 2100(3)  | 31(4) |
| C(56) | -250(5)  | 5378(7) | 1541(3)  | 23(4) |
| C(57) | -198(3)  | 6995(2) | 1505(2)  | 21(4) |
| C(58) | -68(6)   | 7528(3) | 1581(6)  | 20(4) |
| C(59) | -294(7)  | 7806(3) | 2009(6)  | 21(4) |
| C(60) | -627(7)  | 7564(5) | 2361(6)  | 25(4) |
| C(61) | -750(7)  | 7041(5) | 2305(5)  | 28(4) |
| C(62) | -543(6)  | 6761(4) | 1876(5)  | 27(4) |
| C(63) | 79(3)    | 6668(2) | -1430(2) | 20(4) |
| C(64) | 612(3)   | 6786(6) | -1492(6) | 18(4) |
| C(65) | 915(4)   | 6509(7) | -1874(7) | 23(4) |
| C(66) | 681(5)   | 6132(7) | -2203(7) | 23(4) |
| C(67) | 154(5)   | 6021(6) | -2130(6) | 24(4) |
| C(68) | -149(4)  | 6297(6) | -1769(6) | 22(4) |
| C(69) | -1537(5) | 6293(2) | 916(6)   | 21(4) |
| C(70) | -1966(5) | 6391(2) | 1223(8)  | 22(4) |
| C(71) | -2113(5) | 6914(3) | 1316(8)  | 23(4) |
| C(72) | -1803(5) | 7312(2) | 1117(8)  | 23(4) |
| C(73) | -1348(4) | 7199(1) | 815(6)   | 19(3) |
| C(74) | -994(4)  | 7598(1) | 606(6)   | 21(3) |
| C(75) | -1042(5) | 8116(2) | 763(7)   | 23(4) |
| C(76) | -681(5)  | 8490(2) | 592(7)   | 24(4) |
| C(77) | -257(5)  | 8331(2) | 253(7)   | 23(4) |
| C(78) | -238(5)  | 7809(2) | 116(7)   | 24(4) |
| C(79) | 899(2)   | 6645(5) | -48(7)   | 21(4) |
| C(80) | 1426(2)  | 6618(5) | -172(8)  | 23(4) |
| C(81) | 1610(2)  | 6192(5) | -487(7)  | 22(4) |
| C(82) | 1235(2)  | 5825(5) | -661(7)  | 19(4) |
| C(83) | 710(2)   | 5873(4) | -549(6)  | 18(3) |
| C(84) | 295(2)   | 5513(4) | -759(6)  | 20(3) |
| C(85) | 423(2)   | 5061(4) | -1051(7) | 22(4) |

|        |         |         |          |       |
|--------|---------|---------|----------|-------|
| C(86)  | 28(3)   | 4759(5) | -1268(8) | 24(4) |
| C(87)  | -507(3) | 4910(5) | -1200(7) | 20(4) |
| C(88)  | -591(2) | 5351(4) | -873(6)  | 21(4) |
| Th(3)  | 412(1)  | 2307(1) | -37(2)   | 14(1) |
| S(9)   | 1468(2) | 2382(1) | 387(2)   | 19(1) |
| S(10)  | 491(2)  | 3364(1) | -440(2)  | 19(1) |
| S(11)  | -190(2) | 2118(2) | -1012(2) | 21(1) |
| S(12)  | 217(2)  | 1711(1) | 928(2)   | 19(1) |
| N(9)   | 1162(2) | 2029(1) | -713(2)  | 19(3) |
| N(10)  | 523(2)  | 1301(1) | -279(2)  | 15(3) |
| N(11)  | -587(2) | 2438(1) | 206(2)   | 22(4) |
| N(12)  | 154(2)  | 3059(1) | 658(2)   | 18(3) |
| C(89)  | 1605(3) | 2487(3) | 1100(2)  | 20(4) |
| C(90)  | 1876(8) | 2953(5) | 1267(3)  | 24(4) |
| C(91)  | 2021(9) | 3042(6) | 1792(4)  | 32(4) |
| C(92)  | 1883(9) | 2691(6) | 2182(3)  | 31(4) |
| C(93)  | 1606(8) | 2224(6) | 2036(2)  | 28(4) |
| C(94)  | 1483(8) | 2128(5) | 1499(3)  | 26(4) |
| C(95)  | 658(3)  | 3489(2) | -1127(2) | 19(4) |
| C(96)  | 1106(5) | 3751(8) | -1249(3) | 27(4) |
| C(97)  | 1247(6) | 3892(8) | -1777(3) | 28(4) |
| C(98)  | 930(6)  | 3741(8) | -2213(3) | 27(4) |
| C(99)  | 481(6)  | 3460(8) | -2117(2) | 24(4) |
| C(100) | 316(5)  | 3318(7) | -1577(2) | 22(4) |
| C(101) | 122(3)  | 1710(2) | -1504(2) | 19(4) |
| C(102) | -20(7)  | 1191(3) | -1555(6) | 25(4) |
| C(103) | 197(7)  | 861(4)  | -1947(7) | 28(4) |
| C(104) | 586(7)  | 1043(5) | -2281(7) | 29(4) |
| C(105) | 750(6)  | 1575(5) | -2222(6) | 26(4) |
| C(106) | 514(6)  | 1909(4) | -1845(6) | 23(4) |
| C(107) | -99(3)  | 2079(2) | 1438(2)  | 24(4) |
| C(108) | -645(3) | 2034(6) | 1530(6)  | 25(4) |
| C(109) | -875(4) | 2332(7) | 1942(6)  | 29(4) |
| C(110) | -589(5) | 2678(7) | 2264(6)  | 30(4) |
| C(111) | -54(5)  | 2717(6) | 2190(6)  | 25(4) |
| C(112) | 185(4)  | 2434(6) | 1767(6)  | 21(4) |

|        |          |         |          |       |
|--------|----------|---------|----------|-------|
| C(113) | 1466(5)  | 2410(2) | -919(7)  | 21(4) |
| C(114) | 1912(5)  | 2297(2) | -1236(7) | 19(4) |
| C(115) | 2051(5)  | 1787(3) | -1327(8) | 24(4) |
| C(116) | 1729(5)  | 1391(2) | -1104(8) | 23(4) |
| C(117) | 1306(4)  | 1519(1) | -803(6)  | 18(3) |
| C(118) | 933(4)   | 1119(1) | -584(6)  | 16(3) |
| C(119) | 997(5)   | 582(2)  | -697(8)  | 21(4) |
| C(120) | 630(5)   | 211(1)  | -502(7)  | 23(4) |
| C(121) | 221(5)   | 401(1)  | -204(8)  | 22(4) |
| C(122) | 185(5)   | 935(1)  | -112(7)  | 18(4) |
| C(123) | -958(2)  | 2095(5) | 36(7)    | 22(4) |
| C(124) | -1476(2) | 2105(5) | 165(7)   | 23(4) |
| C(125) | -1639(2) | 2522(5) | 492(7)   | 26(4) |
| C(126) | -1290(2) | 2889(5) | 680(7)   | 25(4) |
| C(127) | -756(2)  | 2834(4) | 528(6)   | 20(3) |
| C(128) | -355(2)  | 3202(4) | 759(6)   | 19(3) |
| C(129) | -459(2)  | 3638(4) | 1073(7)  | 19(4) |
| C(130) | -77(3)   | 3946(5) | 1310(8)  | 25(4) |
| C(131) | 441(3)   | 3797(5) | 1202(8)  | 22(4) |
| C(132) | 535(2)   | 3363(5) | 880(6)   | 18(4) |
| Th(4)  | 2926(1)  | 4800(1) | 32(2)    | 14(1) |
| S(13)  | 3980(2)  | 4883(1) | 447(2)   | 18(1) |
| S(14)  | 2983(2)  | 5841(1) | -425(2)  | 18(1) |
| S(15)  | 2333(2)  | 4573(1) | -934(2)  | 18(1) |
| S(16)  | 2744(2)  | 4226(1) | 1021(2)  | 20(1) |
| N(13)  | 3676(2)  | 4538(1) | -632(2)  | 18(3) |
| N(14)  | 3067(2)  | 3782(1) | -188(2)  | 21(3) |
| N(15)  | 1931(2)  | 4941(1) | 263(2)   | 17(3) |
| N(16)  | 2681(2)  | 5569(1) | 701(2)   | 16(3) |
| C(133) | 4131(3)  | 5011(3) | 1151(2)  | 20(3) |
| C(134) | 4437(7)  | 5465(4) | 1266(3)  | 17(3) |
| C(135) | 4605(7)  | 5570(5) | 1802(3)  | 21(3) |
| C(136) | 4481(7)  | 5214(6) | 2228(3)  | 20(3) |
| C(137) | 4171(8)  | 4788(6) | 2102(3)  | 23(3) |
| C(138) | 4006(7)  | 4684(5) | 1576(2)  | 21(3) |
| C(139) | 3013(3)  | 5923(2) | -1144(2) | 22(3) |



|        |         |         |          |       |
|--------|---------|---------|----------|-------|
| C(140) | 3461(4) | 6164(7) | -1375(3) | 22(3) |
| C(141) | 3498(5) | 6277(8) | -1916(3) | 25(3) |
| C(142) | 3081(6) | 6164(8) | -2283(3) | 24(3) |
| C(143) | 2618(5) | 5937(8) | -2055(3) | 22(3) |
| C(144) | 2609(4) | 5828(8) | -1510(3) | 22(3) |
| C(145) | 2701(3) | 4219(2) | -1422(2) | 22(4) |
| C(146) | 2626(7) | 3670(3) | -1493(7) | 28(4) |
| C(147) | 2898(7) | 3379(4) | -1891(7) | 30(4) |
| C(148) | 3263(7) | 3657(5) | -2209(7) | 31(4) |
| C(149) | 3335(6) | 4172(5) | -2155(6) | 26(4) |
| C(150) | 3065(6) | 4483(4) | -1760(6) | 23(4) |
| C(151) | 2332(2) | 4574(2) | 1489(2)  | 15(4) |
| C(152) | 1792(3) | 4451(6) | 1496(6)  | 21(4) |
| C(153) | 1466(3) | 4729(6) | 1847(7)  | 24(4) |
| C(154) | 1667(4) | 5113(7) | 2187(7)  | 25(4) |
| C(155) | 2191(4) | 5233(6) | 2182(6)  | 23(4) |
| C(156) | 2533(3) | 4952(6) | 1831(6)  | 19(4) |
| C(157) | 3964(5) | 4904(2) | -860(6)  | 20(3) |
| C(158) | 4416(5) | 4791(2) | -1176(8) | 22(3) |
| C(159) | 4545(5) | 4274(3) | -1249(8) | 22(3) |
| C(160) | 4265(5) | 3888(2) | -1019(7) | 20(4) |
| C(161) | 3823(4) | 4018(1) | -716(5)  | 17(3) |
| C(162) | 3459(4) | 3614(1) | -509(6)  | 20(3) |
| C(163) | 3510(5) | 3069(2) | -631(7)  | 20(4) |
| C(164) | 3141(5) | 2708(2) | -451(7)  | 23(4) |
| C(165) | 2727(5) | 2899(2) | -155(8)  | 22(4) |
| C(166) | 2719(5) | 3427(2) | -32(7)   | 21(4) |
| C(167) | 1564(2) | 4592(5) | 96(7)    | 18(4) |
| C(168) | 1030(2) | 4628(5) | 198(8)   | 24(4) |
| C(169) | 880(2)  | 5068(5) | 508(7)   | 24(4) |
| C(170) | 1233(2) | 5431(5) | 703(7)   | 20(4) |
| C(171) | 1769(2) | 5369(4) | 568(6)   | 17(3) |
| C(172) | 2178(2) | 5704(4) | 803(6)   | 18(3) |
| C(173) | 2055(2) | 6165(4) | 1124(7)  | 20(4) |
| C(174) | 2466(3) | 6463(5) | 1348(8)  | 23(3) |
| C(175) | 2953(3) | 6306(5) | 1254(7)  | 23(3) |

|        |         |         |        |       |
|--------|---------|---------|--------|-------|
| C(176) | 3059(2) | 5873(5) | 941(6) | 21(3) |
| Th(1B) | 2910    | -189    | -122   | 20    |
| S(1B)  | 3959    | -110    | 310    | 20    |
| S(2B)  | 2996    | 868     | -531   | 20    |
| S(3B)  | 2316    | -370    | -1100  | 20    |
| S(4B)  | 2722    | -805    | 828    | 20    |
| N(1B)  | 3665    | -445    | -808   | 20    |
| N(2B)  | 3060    | -1209   | -357   | 20    |
| N(3B)  | 1889    | -40     | 107    | 20    |
| N(4B)  | 2661    | 567     | 567    | 20    |
| C(201) | 4078    | -41     | 1026   | 20    |
| C(202) | 4425    | 356     | 1211   | 20    |
| C(203) | 4602    | 385     | 1758   | 20    |
| C(204) | 4388    | 10      | 2140   | 20    |
| C(205) | 4079    | -379    | 1971   | 20    |
| C(206) | 3891    | -403    | 1416   | 20    |
| C(207) | 3118    | 1013    | -1235  | 20    |
| C(208) | 3550    | 1342    | -1348  | 20    |
| C(209) | 3632    | 1492    | -1889  | 20    |
| C(210) | 3293    | 1344    | -2308  | 20    |
| C(211) | 2873    | 1008    | -2200  | 20    |
| C(212) | 2795    | 849     | -1664  | 20    |
| C(213) | 2622    | -779    | -1593  | 20    |
| C(214) | 2546    | -1319   | -1613  | 20    |
| C(215) | 2798    | -1632   | -2006  | 20    |
| C(216) | 3109    | -1406   | -2393  | 20    |
| C(217) | 3193    | -866    | -2383  | 20    |
| C(218) | 2945    | -547    | -2004  | 20    |
| C(219) | 2372    | -456    | 1341   | 20    |
| C(220) | 1850    | -585    | 1431   | 20    |
| C(221) | 1573    | -316    | 1833   | 20    |
| C(222) | 1819    | 45      | 2159   | 20    |
| C(223) | 2342    | 188     | 2075   | 20    |
| C(224) | 2619    | -85     | 1687   | 20    |
| C(225) | 3969    | -61     | -1018  | 20    |
| C(226) | 4399    | -159    | -1296  | 20    |

|        |      |       |       |    |
|--------|------|-------|-------|----|
| C(227) | 4541 | -666  | -1426 | 20 |
| C(228) | 4226 | -1090 | -1242 | 20 |
| C(229) | 3799 | -948  | -909  | 20 |
| C(230) | 3449 | -1381 | -699  | 20 |
| C(231) | 3478 | -1898 | -871  | 20 |
| C(232) | 3095 | -2250 | -707  | 20 |
| C(233) | 2713 | -2093 | -350  | 20 |
| C(234) | 2712 | -1571 | -175  | 20 |
| C(235) | 1533 | -395  | -69   | 20 |
| C(236) | 1008 | -379  | 96    | 20 |
| C(237) | 850  | 18    | 411   | 20 |
| C(238) | 1217 | 396   | 596   | 20 |
| C(239) | 1748 | 351   | 453   | 20 |
| C(240) | 2161 | 698   | 666   | 20 |
| C(241) | 2027 | 1154  | 972   | 20 |
| C(242) | 2438 | 1479  | 1151  | 20 |
| C(243) | 2961 | 1338  | 1061  | 20 |
| C(244) | 3040 | 878   | 776   | 20 |
| Th(2B) | 5481 | 2400  | 11    | 20 |
| S(5B)  | 6531 | 2506  | 426   | 20 |
| S(6B)  | 5539 | 3452  | -421  | 20 |
| S(7B)  | 4870 | 2190  | -944  | 20 |
| S(8B)  | 5320 | 1803  | 983   | 20 |
| N(5B)  | 6218 | 2136  | -689  | 20 |
| N(6B)  | 5622 | 1383  | -230  | 20 |
| N(7B)  | 4482 | 2542  | 271   | 20 |
| N(8B)  | 5242 | 3178  | 695   | 20 |
| C(245) | 6660 | 2521  | 1139  | 20 |
| C(246) | 7007 | 2910  | 1357  | 20 |
| C(247) | 7156 | 2889  | 1912  | 20 |
| C(248) | 6961 | 2510  | 2258  | 20 |
| C(249) | 6639 | 2134  | 2053  | 20 |
| C(250) | 6490 | 2122  | 1503  | 20 |
| C(251) | 5619 | 3564  | -1138 | 20 |
| C(252) | 6064 | 3856  | -1304 | 20 |
| C(253) | 6159 | 3931  | -1858 | 20 |

|        |      |      |       |    |
|--------|------|------|-------|----|
| C(254) | 5826 | 3730 | -2244 | 20 |
| C(255) | 5387 | 3425 | -2095 | 20 |
| C(256) | 5292 | 3339 | -1529 | 20 |
| C(257) | 5175 | 1781 | -1445 | 20 |
| C(258) | 5026 | 1249 | -1491 | 20 |
| C(259) | 5208 | 952  | -1928 | 20 |
| C(260) | 5527 | 1170 | -2310 | 20 |
| C(261) | 5697 | 1681 | -2262 | 20 |
| C(262) | 5518 | 1984 | -1835 | 20 |
| C(263) | 4957 | 2168 | 1472  | 20 |
| C(264) | 4440 | 2015 | 1577  | 20 |
| C(265) | 4134 | 2302 | 1948  | 20 |
| C(266) | 4349 | 2730 | 2218  | 20 |
| C(267) | 4872 | 2848 | 2136  | 20 |
| C(268) | 5172 | 2580 | 1765  | 20 |
| C(269) | 6534 | 2526 | -909  | 20 |
| C(270) | 6943 | 2427 | -1243 | 20 |
| C(271) | 7073 | 1903 | -1359 | 20 |
| C(272) | 6788 | 1506 | -1121 | 20 |
| C(273) | 6351 | 1620 | -794  | 20 |
| C(274) | 6003 | 1222 | -571  | 20 |
| C(275) | 6051 | 703  | -721  | 20 |
| C(276) | 5706 | 326  | -523  | 20 |
| C(277) | 5280 | 489  | -189  | 20 |
| C(278) | 5257 | 1013 | -63   | 20 |
| C(279) | 4119 | 2174 | 111   | 20 |
| C(280) | 3593 | 2203 | 241   | 20 |
| C(281) | 3418 | 2619 | 575   | 20 |
| C(282) | 3791 | 2997 | 725   | 20 |
| C(283) | 4314 | 2955 | 595   | 20 |
| C(284) | 4731 | 3319 | 792   | 20 |
| C(285) | 4606 | 3771 | 1085  | 20 |
| C(286) | 5003 | 4078 | 1289  | 20 |
| C(287) | 5538 | 3928 | 1213  | 20 |
| C(288) | 5618 | 3485 | 888   | 20 |
| Th(3B) | 4600 | 6477 | -39   | 20 |

|        |      |      |       |    |
|--------|------|------|-------|----|
| S(9B)  | 3541 | 6383 | -448  | 20 |
| S(10B) | 4535 | 5431 | 395   | 20 |
| S(11B) | 5210 | 6698 | 923   | 20 |
| S(12B) | 4779 | 7050 | -1024 | 20 |
| N(9B)  | 3854 | 6767 | 637   | 20 |
| N(10B) | 4481 | 7489 | 175   | 20 |
| N(11B) | 5597 | 6349 | -291  | 20 |
| N(12B) | 4857 | 5710 | -716  | 20 |
| C(289) | 3397 | 6243 | -1154 | 20 |
| C(290) | 3109 | 5779 | -1292 | 20 |
| C(291) | 2916 | 5691 | -1800 | 20 |
| C(292) | 2998 | 6053 | -2198 | 20 |
| C(293) | 3311 | 6505 | -2087 | 20 |
| C(294) | 3510 | 6586 | -1571 | 20 |
| C(295) | 4379 | 5322 | 1088  | 20 |
| C(296) | 3949 | 5039 | 1224  | 20 |
| C(297) | 3840 | 4874 | 1754  | 20 |
| C(298) | 4167 | 5032 | 2179  | 20 |
| C(299) | 4600 | 5333 | 2070  | 20 |
| C(300) | 4728 | 5504 | 1528  | 20 |
| C(301) | 4891 | 7096 | 1417  | 20 |
| C(302) | 4975 | 7630 | 1427  | 20 |
| C(303) | 4755 | 7956 | 1821  | 20 |
| C(304) | 4463 | 7744 | 2234  | 20 |
| C(305) | 4360 | 7193 | 2223  | 20 |
| C(306) | 4564 | 6874 | 1813  | 20 |
| C(307) | 5101 | 6674 | -1523 | 20 |
| C(308) | 5655 | 6672 | -1566 | 20 |
| C(309) | 5889 | 6390 | -1987 | 20 |
| C(310) | 5600 | 6092 | -2357 | 20 |
| C(311) | 5061 | 6074 | -2308 | 20 |
| C(312) | 4813 | 6381 | -1909 | 20 |
| C(313) | 3555 | 6389 | 856   | 20 |
| C(314) | 3121 | 6507 | 1189  | 20 |
| C(315) | 2987 | 7018 | 1279  | 20 |
| C(316) | 3286 | 7410 | 1016  | 20 |

|        |       |       |       |    |
|--------|-------|-------|-------|----|
| C(317) | 3707  | 7278  | 714   | 20 |
| C(318) | 4076  | 7675  | 484   | 20 |
| C(319) | 4025  | 8211  | 607   | 20 |
| C(320) | 4379  | 8582  | 386   | 20 |
| C(321) | 4775  | 8389  | 70    | 20 |
| C(322) | 4815  | 7853  | -7    | 20 |
| C(323) | 5970  | 6690  | -120  | 20 |
| C(324) | 6489  | 6671  | -239  | 20 |
| C(325) | 6646  | 6269  | -588  | 20 |
| C(326) | 6297  | 5900  | -770  | 20 |
| C(327) | 5766  | 5948  | -605  | 20 |
| C(328) | 5367  | 5568  | -819  | 20 |
| C(329) | 5474  | 5096  | -1067 | 20 |
| C(330) | 5094  | 4748  | -1237 | 20 |
| C(331) | 4575  | 4914  | -1164 | 20 |
| C(332) | 4478  | 5390  | -915  | 20 |
| Th(4B) | -2975 | -1021 | -44   | 20 |
| S(13B) | -4029 | -1105 | -459  | 20 |
| S(14B) | -3031 | -2062 | 412   | 20 |
| S(15B) | -2382 | -794  | 921   | 20 |
| S(16B) | -2794 | -447  | -1033 | 20 |
| N(13B) | -3725 | -759  | 620   | 20 |
| N(14B) | -3117 | -3    | 176   | 20 |
| N(15B) | -1980 | -1162 | -276  | 20 |
| N(16B) | -2730 | -1790 | -714  | 20 |
| C(333) | -4181 | -1213 | -1167 | 20 |
| C(334) | -4523 | -1637 | -1292 | 20 |
| C(335) | -4671 | -1738 | -1835 | 20 |
| C(336) | -4464 | -1427 | -2262 | 20 |
| C(337) | -4150 | -1007 | -2121 | 20 |
| C(338) | -4012 | -902  | -1587 | 20 |
| C(339) | -3092 | -2143 | 1129  | 20 |
| C(340) | -3491 | -2477 | 1333  | 20 |
| C(341) | -3508 | -2636 | 1863  | 20 |
| C(342) | -3128 | -2463 | 2249  | 20 |
| C(343) | -2739 | -2102 | 2056  | 20 |

|        |       |       |       |    |
|--------|-------|-------|-------|----|
| C(344) | -2741 | -1964 | 1518  | 20 |
| C(345) | -2735 | -401  | 1390  | 20 |
| C(346) | -2593 | 133   | 1480  | 20 |
| C(347) | -2816 | 436   | 1901  | 20 |
| C(348) | -3182 | 183   | 2238  | 20 |
| C(349) | -3340 | -308  | 2143  | 20 |
| C(350) | -3136 | -624  | 1713  | 20 |
| C(351) | -2407 | -807  | -1515 | 20 |
| C(352) | -1871 | -678  | -1562 | 20 |
| C(353) | -1555 | -988  | -1893 | 20 |
| C(354) | -1759 | -1418 | -2166 | 20 |
| C(355) | -2283 | -1532 | -2137 | 20 |
| C(356) | -2617 | -1216 | -1809 | 20 |
| C(357) | -4012 | -1126 | 850   | 20 |
| C(358) | -4442 | -1012 | 1196  | 20 |
| C(359) | -4572 | -495  | 1270  | 20 |
| C(360) | -4305 | -110  | 1021  | 20 |
| C(361) | -3870 | -240  | 708   | 20 |
| C(362) | -3505 | 164   | 502   | 20 |
| C(363) | -3541 | 705   | 645   | 20 |
| C(364) | -3197 | 1072  | 429   | 20 |
| C(365) | -2795 | 885   | 112   | 20 |
| C(366) | -2773 | 353   | 12    | 20 |
| C(367) | -1609 | -829  | -82   | 20 |
| C(368) | -1075 | -869  | -179  | 20 |
| C(369) | -929  | -1288 | -520  | 20 |
| C(370) | -1282 | -1653 | -714  | 20 |
| C(371) | -1818 | -1591 | -580  | 20 |
| C(372) | -2227 | -1925 | -815  | 20 |
| C(373) | -2104 | -2395 | -1123 | 20 |
| C(374) | -2514 | -2719 | -1303 | 20 |
| C(375) | -3002 | -2559 | -1217 | 20 |
| C(376) | -3108 | -2102 | -943  | 20 |

---

**Table S4.** Bond lengths [Å] and angles [°] for **1**.

|            |            |             |            |
|------------|------------|-------------|------------|
| Th(1)-N(4) | 2.6269(11) | C(8)-H(8)   | 0.9500     |
| Th(1)-N(1) | 2.6445(11) | C(9)-C(10)  | 1.3757(14) |
| Th(1)-N(2) | 2.6692(11) | C(9)-H(9)   | 0.9500     |
| Th(1)-N(3) | 2.6910(11) | C(10)-C(11) | 1.3927(14) |
| Th(1)-S(3) | 2.8348(12) | C(10)-H(10) | 0.9500     |
| Th(1)-S(4) | 2.8355(12) | C(11)-C(12) | 1.3824(14) |
| Th(1)-S(1) | 2.8575(12) | C(11)-H(11) | 0.9500     |
| Th(1)-S(2) | 2.8595(12) | C(12)-H(12) | 0.9500     |
| S(1)-C(1)  | 1.7720(14) | C(13)-C(14) | 1.3797(14) |
| S(2)-C(7)  | 1.7840(14) | C(13)-C(18) | 1.4300(14) |
| S(3)-C(13) | 1.7727(14) | C(14)-C(15) | 1.4024(14) |
| S(4)-C(19) | 1.7787(14) | C(14)-H(14) | 0.9500     |
| N(1)-C(29) | 1.3401(13) | C(15)-C(16) | 1.3675(14) |
| N(1)-C(25) | 1.3467(13) | C(15)-H(15) | 0.9500     |
| N(2)-C(34) | 1.3528(14) | C(16)-C(17) | 1.3816(14) |
| N(2)-C(30) | 1.3725(13) | C(16)-H(16) | 0.9500     |
| N(3)-C(35) | 1.3410(14) | C(17)-C(18) | 1.3856(14) |
| N(3)-C(39) | 1.3506(13) | C(17)-H(17) | 0.9500     |
| N(4)-C(44) | 1.3367(13) | C(18)-H(18) | 0.9500     |
| N(4)-C(40) | 1.3394(13) | C(19)-C(20) | 1.3877(14) |
| C(1)-C(2)  | 1.4042(14) | C(19)-C(24) | 1.4020(14) |
| C(1)-C(6)  | 1.4062(14) | C(20)-C(21) | 1.3925(14) |
| C(2)-C(3)  | 1.4003(14) | C(20)-H(20) | 0.9500     |
| C(2)-H(2)  | 0.9500     | C(21)-C(22) | 1.3543(14) |
| C(3)-C(4)  | 1.4386(14) | C(21)-H(21) | 0.9500     |
| C(3)-H(3)  | 0.9500     | C(22)-C(23) | 1.3963(14) |
| C(4)-C(5)  | 1.3207(14) | C(22)-H(22) | 0.9500     |
| C(4)-H(4)  | 0.9500     | C(23)-C(24) | 1.3723(14) |
| C(5)-C(6)  | 1.4264(14) | C(23)-H(23) | 0.9500     |
| C(5)-H(5)  | 0.9500     | C(24)-H(24) | 0.9500     |
| C(6)-H(6)  | 0.9500     | C(25)-C(26) | 1.3183(14) |
| C(7)-C(12) | 1.3828(14) | C(25)-H(25) | 0.9500     |
| C(7)-C(8)  | 1.4091(14) | C(26)-C(27) | 1.3694(14) |
| C(8)-C(9)  | 1.3885(14) | C(26)-H(26) | 0.9500     |



|             |            |             |            |
|-------------|------------|-------------|------------|
| C(27)-C(28) | 1.4148(14) | Th(2)-S(5)  | 2.8489(12) |
| C(27)-H(27) | 0.9500     | Th(2)-S(6)  | 2.8638(12) |
| C(28)-C(29) | 1.4117(14) | S(5)-C(45)  | 1.7631(14) |
| C(28)-H(28) | 0.9500     | S(6)-C(51)  | 1.7830(14) |
| C(29)-C(30) | 1.5044(13) | S(7)-C(57)  | 1.7843(14) |
| C(30)-C(31) | 1.3757(14) | S(8)-C(63)  | 1.7763(14) |
| C(31)-C(32) | 1.3809(14) | N(5)-C(73)  | 1.3719(13) |
| C(31)-H(31) | 0.9500     | N(5)-C(69)  | 1.3856(13) |
| C(32)-C(33) | 1.3719(14) | N(6)-C(74)  | 1.3484(13) |
| C(32)-H(32) | 0.9500     | N(6)-C(78)  | 1.3815(14) |
| C(33)-C(34) | 1.3868(14) | N(7)-C(79)  | 1.3614(13) |
| C(33)-H(33) | 0.9500     | N(7)-C(83)  | 1.3805(13) |
| C(34)-H(34) | 0.9500     | N(8)-C(88)  | 1.3120(14) |
| C(35)-C(36) | 1.3998(14) | N(8)-C(84)  | 1.3727(13) |
| C(35)-H(35) | 0.9500     | C(45)-C(50) | 1.4145(14) |
| C(36)-C(37) | 1.3290(14) | C(45)-C(46) | 1.4172(14) |
| C(36)-H(36) | 0.9500     | C(46)-C(47) | 1.3992(14) |
| C(37)-C(38) | 1.4019(14) | C(46)-H(46) | 0.9500     |
| C(37)-H(37) | 0.9500     | C(47)-C(48) | 1.3715(14) |
| C(38)-C(39) | 1.4047(13) | C(47)-H(47) | 0.9500     |
| C(38)-H(38) | 0.9500     | C(48)-C(49) | 1.3441(14) |
| C(39)-C(40) | 1.4566(12) | C(48)-H(48) | 0.9500     |
| C(40)-C(41) | 1.4162(13) | C(49)-C(50) | 1.3840(14) |
| C(41)-C(42) | 1.3940(14) | C(49)-H(49) | 0.9500     |
| C(41)-H(41) | 0.9500     | C(50)-H(50) | 0.9500     |
| C(42)-C(43) | 1.3961(14) | C(51)-C(56) | 1.3743(14) |
| C(42)-H(42) | 0.9500     | C(51)-C(52) | 1.4162(14) |
| C(43)-C(44) | 1.3712(14) | C(52)-C(53) | 1.3870(14) |
| C(43)-H(43) | 0.9500     | C(52)-H(52) | 0.9500     |
| C(44)-H(44) | 0.9500     | C(53)-C(54) | 1.3514(14) |
| Th(2)-N(5)  | 2.6377(11) | C(53)-H(53) | 0.9500     |
| Th(2)-N(8)  | 2.6517(11) | C(54)-C(55) | 1.4093(14) |
| Th(2)-N(7)  | 2.6539(11) | C(54)-H(54) | 0.9500     |
| Th(2)-N(6)  | 2.6637(11) | C(55)-C(56) | 1.4191(14) |
| Th(2)-S(7)  | 2.8259(12) | C(55)-H(55) | 0.9500     |
| Th(2)-S(8)  | 2.8412(12) | C(56)-H(56) | 0.9500     |

|             |            |              |            |
|-------------|------------|--------------|------------|
| C(57)-C(62) | 1.3982(14) | C(77)-C(78)  | 1.3605(14) |
| C(57)-C(58) | 1.4008(14) | C(77)-H(77)  | 0.9500     |
| C(58)-C(59) | 1.3896(14) | C(78)-H(78)  | 0.9500     |
| C(58)-H(58) | 0.9500     | C(79)-C(80)  | 1.3805(14) |
| C(59)-C(60) | 1.3608(14) | C(79)-H(79)  | 0.9500     |
| C(59)-H(59) | 0.9500     | C(80)-C(81)  | 1.4054(14) |
| C(60)-C(61) | 1.3651(14) | C(80)-H(80)  | 0.9500     |
| C(60)-H(60) | 0.9500     | C(81)-C(82)  | 1.3911(14) |
| C(61)-C(62) | 1.3741(14) | C(81)-H(81)  | 0.9500     |
| C(61)-H(61) | 0.9500     | C(82)-C(83)  | 1.3738(13) |
| C(62)-H(62) | 0.9500     | C(82)-H(82)  | 0.9500     |
| C(63)-C(68) | 1.3704(14) | C(83)-C(84)  | 1.4780(13) |
| C(63)-C(64) | 1.3993(14) | C(84)-C(85)  | 1.3859(13) |
| C(64)-C(65) | 1.4034(14) | C(85)-C(86)  | 1.3602(14) |
| C(64)-H(64) | 0.9500     | C(85)-H(85)  | 0.9500     |
| C(65)-C(66) | 1.3737(14) | C(86)-C(87)  | 1.4265(14) |
| C(65)-H(65) | 0.9500     | C(86)-H(86)  | 0.9500     |
| C(66)-C(67) | 1.3816(14) | C(87)-C(88)  | 1.3873(14) |
| C(66)-H(66) | 0.9500     | C(87)-H(87)  | 0.9500     |
| C(67)-C(68) | 1.3687(14) | C(88)-H(88)  | 0.9500     |
| C(67)-H(67) | 0.9500     | Th(3)-N(10)  | 2.6278(11) |
| C(68)-H(68) | 0.9500     | Th(3)-N(12)  | 2.6336(11) |
| C(69)-C(70) | 1.3535(14) | Th(3)-N(9)   | 2.6353(11) |
| C(69)-H(69) | 0.9500     | Th(3)-N(11)  | 2.6381(11) |
| C(70)-C(71) | 1.3940(14) | Th(3)-S(12)  | 2.8424(12) |
| C(70)-H(70) | 0.9500     | Th(3)-S(11)  | 2.8425(12) |
| C(71)-C(72) | 1.3725(14) | Th(3)-S(10)  | 2.8540(12) |
| C(71)-H(71) | 0.9500     | Th(3)-S(9)   | 2.8669(12) |
| C(72)-C(73) | 1.4082(13) | S(9)-C(89)   | 1.7844(14) |
| C(72)-H(72) | 0.9500     | S(10)-C(95)  | 1.7608(14) |
| C(73)-C(74) | 1.4503(13) | S(11)-C(101) | 1.7756(14) |
| C(74)-C(75) | 1.3687(13) | S(12)-C(107) | 1.7566(13) |
| C(75)-C(76) | 1.3868(14) | N(9)-C(113)  | 1.3366(14) |
| C(75)-H(75) | 0.9500     | N(9)-C(117)  | 1.3584(13) |
| C(76)-C(77) | 1.4266(14) | N(10)-C(122) | 1.3323(13) |
| C(76)-H(76) | 0.9500     | N(10)-C(118) | 1.3680(13) |

|               |            |               |            |
|---------------|------------|---------------|------------|
| N(11)-C(123)  | 1.3426(13) | C(106)-H(106) | 0.9500     |
| N(11)-C(127)  | 1.3446(13) | C(107)-C(112) | 1.3947(14) |
| N(12)-C(132)  | 1.3434(13) | C(107)-C(108) | 1.4143(14) |
| N(12)-C(128)  | 1.3713(13) | C(108)-C(109) | 1.3895(14) |
| C(89)-C(94)   | 1.3685(14) | C(108)-H(108) | 0.9500     |
| C(89)-C(90)   | 1.4196(14) | C(109)-C(110) | 1.3765(14) |
| C(90)-C(91)   | 1.3431(14) | C(109)-H(109) | 0.9500     |
| C(90)-H(90)   | 0.9500     | C(110)-C(111) | 1.3773(14) |
| C(91)-C(92)   | 1.3495(14) | C(110)-H(110) | 0.9500     |
| C(91)-H(91)   | 0.9500     | C(111)-C(112) | 1.4015(14) |
| C(92)-C(93)   | 1.4159(14) | C(111)-H(111) | 0.9500     |
| C(92)-H(92)   | 0.9500     | C(112)-H(112) | 0.9500     |
| C(93)-C(94)   | 1.3620(14) | C(113)-C(114) | 1.4128(14) |
| C(93)-H(93)   | 0.9500     | C(113)-H(113) | 0.9500     |
| C(94)-H(94)   | 0.9500     | C(114)-C(115) | 1.3536(14) |
| C(95)-C(96)   | 1.3525(14) | C(114)-H(114) | 0.9500     |
| C(95)-C(100)  | 1.4530(14) | C(115)-C(116) | 1.4077(14) |
| C(96)-C(97)   | 1.3870(14) | C(115)-H(115) | 0.9500     |
| C(96)-H(96)   | 0.9500     | C(116)-C(117) | 1.3503(13) |
| C(97)-C(98)   | 1.3751(14) | C(116)-H(116) | 0.9500     |
| C(97)-H(97)   | 0.9500     | C(117)-C(118) | 1.4898(13) |
| C(98)-C(99)   | 1.3674(14) | C(118)-C(119) | 1.3948(13) |
| C(98)-H(98)   | 0.9500     | C(119)-C(120) | 1.4118(14) |
| C(99)-C(100)  | 1.4318(14) | C(119)-H(119) | 0.9500     |
| C(99)-H(99)   | 0.9500     | C(120)-C(121) | 1.3664(14) |
| C(100)-H(100) | 0.9500     | C(120)-H(120) | 0.9500     |
| C(101)-C(102) | 1.3658(14) | C(121)-C(122) | 1.3703(14) |
| C(101)-C(106) | 1.4002(14) | C(121)-H(121) | 0.9500     |
| C(102)-C(103) | 1.3885(14) | C(122)-H(122) | 0.9500     |
| C(102)-H(102) | 0.9500     | C(123)-C(124) | 1.3578(14) |
| C(103)-C(104) | 1.3706(14) | C(123)-H(123) | 0.9500     |
| C(103)-H(103) | 0.9500     | C(124)-C(125) | 1.3879(14) |
| C(104)-C(105) | 1.4152(14) | C(124)-H(124) | 0.9500     |
| C(104)-H(104) | 0.9500     | C(125)-C(126) | 1.3569(14) |
| C(105)-C(106) | 1.3903(14) | C(125)-H(125) | 0.9500     |
| C(105)-H(105) | 0.9500     | C(126)-C(127) | 1.4205(13) |

|               |            |               |            |
|---------------|------------|---------------|------------|
| C(126)-H(126) | 0.9500     | C(136)-C(137) | 1.3668(14) |
| C(127)-C(128) | 1.4839(13) | C(136)-H(136) | 0.9500     |
| C(128)-C(129) | 1.3681(13) | C(137)-C(138) | 1.3671(14) |
| C(129)-C(130) | 1.3647(14) | C(137)-H(137) | 0.9500     |
| C(129)-H(129) | 0.9500     | C(138)-H(138) | 0.9500     |
| C(130)-C(131) | 1.3994(14) | C(139)-C(144) | 1.3680(14) |
| C(130)-H(130) | 0.9500     | C(139)-C(140) | 1.4170(14) |
| C(131)-C(132) | 1.3702(14) | C(140)-C(141) | 1.3520(14) |
| C(131)-H(131) | 0.9500     | C(140)-H(140) | 0.9500     |
| C(132)-H(132) | 0.9500     | C(141)-C(142) | 1.4049(14) |
| Th(4)-N(13)   | 2.6065(11) | C(141)-H(141) | 0.9500     |
| Th(4)-N(16)   | 2.6183(11) | C(142)-C(143) | 1.4311(14) |
| Th(4)-N(15)   | 2.6246(11) | C(142)-H(142) | 0.9500     |
| Th(4)-N(14)   | 2.6527(11) | C(143)-C(144) | 1.3544(14) |
| Th(4)-S(15)   | 2.8301(12) | C(143)-H(143) | 0.9500     |
| Th(4)-S(16)   | 2.8544(12) | C(144)-H(144) | 0.9500     |
| Th(4)-S(13)   | 2.8563(12) | C(145)-C(146) | 1.4129(14) |
| Th(4)-S(14)   | 2.8615(12) | C(145)-C(150) | 1.4144(14) |
| S(13)-C(133)  | 1.7792(14) | C(146)-C(147) | 1.4070(14) |
| S(14)-C(139)  | 1.7646(14) | C(146)-H(146) | 0.9500     |
| S(15)-C(145)  | 1.7686(14) | C(147)-C(148) | 1.4052(14) |
| S(16)-C(151)  | 1.7909(13) | C(147)-H(147) | 0.9500     |
| N(13)-C(157)  | 1.3097(13) | C(148)-C(149) | 1.3217(14) |
| N(13)-C(161)  | 1.3800(13) | C(148)-H(148) | 0.9500     |
| N(14)-C(166)  | 1.3208(13) | C(149)-C(150) | 1.4243(14) |
| N(14)-C(162)  | 1.3449(13) | C(149)-H(149) | 0.9500     |
| N(15)-C(167)  | 1.3434(13) | C(150)-H(150) | 0.9500     |
| N(15)-C(171)  | 1.3793(13) | C(151)-C(156) | 1.3613(14) |
| N(16)-C(172)  | 1.3493(13) | C(151)-C(152) | 1.4090(14) |
| N(16)-C(176)  | 1.3563(13) | C(152)-C(153) | 1.3896(14) |
| C(133)-C(138) | 1.3635(14) | C(152)-H(152) | 0.9500     |
| C(133)-C(134) | 1.4116(14) | C(153)-C(154) | 1.3693(14) |
| C(134)-C(135) | 1.3922(14) | C(153)-H(153) | 0.9500     |
| C(134)-H(134) | 0.9500     | C(154)-C(155) | 1.3657(14) |
| C(135)-C(136) | 1.4113(14) | C(154)-H(154) | 0.9500     |
| C(135)-H(135) | 0.9500     | C(155)-C(156) | 1.4192(14) |

|               |            |               |        |
|---------------|------------|---------------|--------|
| C(155)-H(155) | 0.9500     | Th(1B)-N(4B)  | 2.6270 |
| C(156)-H(156) | 0.9500     | Th(1B)-N(1B)  | 2.6444 |
| C(157)-C(158) | 1.4207(14) | Th(1B)-N(2B)  | 2.6692 |
| C(157)-H(157) | 0.9500     | Th(1B)-N(3B)  | 2.6910 |
| C(158)-C(159) | 1.3610(14) | Th(1B)-S(3B)  | 2.8348 |
| C(158)-H(158) | 0.9500     | Th(1B)-S(4B)  | 2.8356 |
| C(159)-C(160) | 1.3374(14) | Th(1B)-S(1B)  | 2.8575 |
| C(159)-H(159) | 0.9500     | Th(1B)-S(2B)  | 2.8596 |
| C(160)-C(161) | 1.3924(13) | S(1B)-C(201)  | 1.7721 |
| C(160)-H(160) | 0.9500     | S(2B)-C(207)  | 1.7839 |
| C(161)-C(162) | 1.4739(13) | S(3B)-C(213)  | 1.7726 |
| C(162)-C(163) | 1.4148(13) | S(4B)-C(219)  | 1.7785 |
| C(163)-C(164) | 1.3852(14) | N(1B)-C(229)  | 1.3401 |
| C(163)-H(163) | 0.9500     | N(1B)-C(225)  | 1.3467 |
| C(164)-C(165) | 1.3732(14) | N(2B)-C(234)  | 1.3527 |
| C(164)-H(164) | 0.9500     | N(2B)-C(230)  | 1.3724 |
| C(165)-C(166) | 1.3684(14) | N(3B)-C(235)  | 1.3410 |
| C(165)-H(165) | 0.9500     | N(3B)-C(239)  | 1.3506 |
| C(166)-H(166) | 0.9500     | N(4B)-C(244)  | 1.3368 |
| C(167)-C(168) | 1.3859(14) | N(4B)-C(240)  | 1.3394 |
| C(167)-H(167) | 0.9500     | C(201)-C(202) | 1.4043 |
| C(168)-C(169) | 1.4004(14) | C(201)-C(206) | 1.4063 |
| C(168)-H(168) | 0.9500     | C(202)-C(203) | 1.4004 |
| C(169)-C(170) | 1.3645(14) | C(202)-H(202) | 0.9500 |
| C(169)-H(169) | 0.9500     | C(203)-C(204) | 1.4386 |
| C(170)-C(171) | 1.4155(14) | C(203)-H(203) | 0.9500 |
| C(170)-H(170) | 0.9500     | C(204)-C(205) | 1.3208 |
| C(171)-C(172) | 1.4517(13) | C(204)-H(204) | 0.9500 |
| C(172)-C(173) | 1.4402(13) | C(205)-C(206) | 1.4265 |
| C(173)-C(174) | 1.3919(14) | C(205)-H(205) | 0.9500 |
| C(173)-H(173) | 0.9500     | C(206)-H(206) | 0.9500 |
| C(174)-C(175) | 1.3239(14) | C(207)-C(212) | 1.3827 |
| C(174)-H(174) | 0.9500     | C(207)-C(208) | 1.4091 |
| C(175)-C(176) | 1.3615(14) | C(208)-C(209) | 1.3886 |
| C(175)-H(175) | 0.9500     | C(208)-H(208) | 0.9500 |
| C(176)-H(176) | 0.9500     | C(209)-C(210) | 1.3758 |

|               |        |               |        |
|---------------|--------|---------------|--------|
| C(209)-H(209) | 0.9500 | C(229)-C(230) | 1.5046 |
| C(210)-C(211) | 1.3927 | C(230)-C(231) | 1.3758 |
| C(210)-H(210) | 0.9500 | C(231)-C(232) | 1.3809 |
| C(211)-C(212) | 1.3825 | C(231)-H(231) | 0.9500 |
| C(211)-H(211) | 0.9500 | C(232)-C(233) | 1.3719 |
| C(212)-H(212) | 0.9500 | C(232)-H(232) | 0.9500 |
| C(213)-C(214) | 1.3796 | C(233)-C(234) | 1.3868 |
| C(213)-C(218) | 1.4299 | C(233)-H(233) | 0.9500 |
| C(214)-C(215) | 1.4025 | C(234)-H(234) | 0.9500 |
| C(214)-H(214) | 0.9500 | C(235)-C(236) | 1.3998 |
| C(215)-C(216) | 1.3676 | C(235)-H(235) | 0.9500 |
| C(215)-H(215) | 0.9500 | C(236)-C(237) | 1.3291 |
| C(216)-C(217) | 1.3816 | C(236)-H(236) | 0.9500 |
| C(216)-H(216) | 0.9500 | C(237)-C(238) | 1.4020 |
| C(217)-C(218) | 1.3856 | C(237)-H(237) | 0.9500 |
| C(217)-H(217) | 0.9500 | C(238)-C(239) | 1.4047 |
| C(218)-H(218) | 0.9500 | C(238)-H(238) | 0.9500 |
| C(219)-C(220) | 1.3877 | C(239)-C(240) | 1.4565 |
| C(219)-C(224) | 1.4019 | C(240)-C(241) | 1.4162 |
| C(220)-C(221) | 1.3926 | C(241)-C(242) | 1.3941 |
| C(220)-H(220) | 0.9500 | C(241)-H(241) | 0.9500 |
| C(221)-C(222) | 1.3543 | C(242)-C(243) | 1.3962 |
| C(221)-H(221) | 0.9500 | C(242)-H(242) | 0.9500 |
| C(222)-C(223) | 1.3963 | C(243)-C(244) | 1.3712 |
| C(222)-H(222) | 0.9500 | C(243)-H(243) | 0.9500 |
| C(223)-C(224) | 1.3723 | C(244)-H(244) | 0.9500 |
| C(223)-H(223) | 0.9500 | Th(2B)-N(5B)  | 2.6377 |
| C(224)-H(224) | 0.9500 | Th(2B)-N(8B)  | 2.6518 |
| C(225)-C(226) | 1.3184 | Th(2B)-N(7B)  | 2.6539 |
| C(225)-H(225) | 0.9500 | Th(2B)-N(6B)  | 2.6637 |
| C(226)-C(227) | 1.3694 | Th(2B)-S(7B)  | 2.8259 |
| C(226)-H(226) | 0.9500 | Th(2B)-S(8B)  | 2.8412 |
| C(227)-C(228) | 1.4149 | Th(2B)-S(5B)  | 2.8489 |
| C(227)-H(227) | 0.9500 | Th(2B)-S(6B)  | 2.8638 |
| C(228)-C(229) | 1.4118 | S(5B)-C(245)  | 1.7631 |
| C(228)-H(228) | 0.9500 | S(6B)-C(251)  | 1.7830 |

|               |        |               |        |
|---------------|--------|---------------|--------|
| S(7B)-C(257)  | 1.7843 | C(259)-C(260) | 1.3608 |
| S(8B)-C(263)  | 1.7763 | C(259)-H(259) | 0.9500 |
| N(5B)-C(273)  | 1.3719 | C(260)-C(261) | 1.3651 |
| N(5B)-C(269)  | 1.3856 | C(260)-H(260) | 0.9500 |
| N(6B)-C(274)  | 1.3484 | C(261)-C(262) | 1.3741 |
| N(6B)-C(278)  | 1.3815 | C(261)-H(261) | 0.9500 |
| N(7B)-C(279)  | 1.3614 | C(262)-H(262) | 0.9500 |
| N(7B)-C(283)  | 1.3805 | C(263)-C(268) | 1.3704 |
| N(8B)-C(288)  | 1.3120 | C(263)-C(264) | 1.3993 |
| N(8B)-C(284)  | 1.3727 | C(264)-C(265) | 1.4034 |
| C(245)-C(250) | 1.4145 | C(264)-H(264) | 0.9500 |
| C(245)-C(246) | 1.4172 | C(265)-C(266) | 1.3737 |
| C(246)-C(247) | 1.3992 | C(265)-H(265) | 0.9500 |
| C(246)-H(246) | 0.9500 | C(266)-C(267) | 1.3816 |
| C(247)-C(248) | 1.3715 | C(266)-H(266) | 0.9500 |
| C(247)-H(247) | 0.9500 | C(267)-C(268) | 1.3687 |
| C(248)-C(249) | 1.3441 | C(267)-H(267) | 0.9500 |
| C(248)-H(248) | 0.9500 | C(268)-H(268) | 0.9500 |
| C(249)-C(250) | 1.3840 | C(269)-C(270) | 1.3535 |
| C(249)-H(249) | 0.9500 | C(269)-H(269) | 0.9500 |
| C(250)-H(250) | 0.9500 | C(270)-C(271) | 1.3940 |
| C(251)-C(256) | 1.3744 | C(270)-H(270) | 0.9500 |
| C(251)-C(252) | 1.4163 | C(271)-C(272) | 1.3725 |
| C(252)-C(253) | 1.3870 | C(271)-H(271) | 0.9500 |
| C(252)-H(252) | 0.9500 | C(272)-C(273) | 1.4083 |
| C(253)-C(254) | 1.3514 | C(272)-H(272) | 0.9500 |
| C(253)-H(253) | 0.9500 | C(273)-C(274) | 1.4503 |
| C(254)-C(255) | 1.4093 | C(274)-C(275) | 1.3687 |
| C(254)-H(254) | 0.9500 | C(275)-C(276) | 1.3869 |
| C(255)-C(256) | 1.4191 | C(275)-H(275) | 0.9500 |
| C(255)-H(255) | 0.9500 | C(276)-C(277) | 1.4267 |
| C(256)-H(256) | 0.9500 | C(276)-H(276) | 0.9500 |
| C(257)-C(262) | 1.3982 | C(277)-C(278) | 1.3606 |
| C(257)-C(258) | 1.4008 | C(277)-H(277) | 0.9500 |
| C(258)-C(259) | 1.3897 | C(278)-H(278) | 0.9500 |
| C(258)-H(258) | 0.9500 | C(279)-C(280) | 1.3806 |

|               |        |               |        |
|---------------|--------|---------------|--------|
| C(279)-H(279) | 0.9500 | C(289)-C(294) | 1.3687 |
| C(280)-C(281) | 1.4055 | C(289)-C(290) | 1.4198 |
| C(280)-H(280) | 0.9500 | C(290)-C(291) | 1.3431 |
| C(281)-C(282) | 1.3912 | C(290)-H(290) | 0.9500 |
| C(281)-H(281) | 0.9500 | C(291)-C(292) | 1.3495 |
| C(282)-C(283) | 1.3738 | C(291)-H(291) | 0.9500 |
| C(282)-H(282) | 0.9500 | C(292)-C(293) | 1.4160 |
| C(283)-C(284) | 1.4781 | C(292)-H(292) | 0.9500 |
| C(284)-C(285) | 1.3859 | C(293)-C(294) | 1.3621 |
| C(285)-C(286) | 1.3602 | C(293)-H(293) | 0.9500 |
| C(285)-H(285) | 0.9500 | C(294)-H(294) | 0.9500 |
| C(286)-C(287) | 1.4265 | C(295)-C(296) | 1.3526 |
| C(286)-H(286) | 0.9500 | C(295)-C(300) | 1.4531 |
| C(287)-C(288) | 1.3873 | C(296)-C(297) | 1.3870 |
| C(287)-H(287) | 0.9500 | C(296)-H(296) | 0.9500 |
| C(288)-H(288) | 0.9500 | C(297)-C(298) | 1.3751 |
| Th(3B)-N(10B) | 2.6278 | C(297)-H(297) | 0.9500 |
| Th(3B)-N(12B) | 2.6337 | C(298)-C(299) | 1.3674 |
| Th(3B)-N(9B)  | 2.6353 | C(298)-H(298) | 0.9500 |
| Th(3B)-N(11B) | 2.6380 | C(299)-C(300) | 1.4318 |
| Th(3B)-S(12B) | 2.8424 | C(299)-H(299) | 0.9500 |
| Th(3B)-S(11B) | 2.8425 | C(300)-H(300) | 0.9500 |
| Th(3B)-S(10B) | 2.8540 | C(301)-C(302) | 1.3659 |
| Th(3B)-S(9B)  | 2.8669 | C(301)-C(306) | 1.4002 |
| S(9B)-C(289)  | 1.7846 | C(302)-C(303) | 1.3886 |
| S(10B)-C(295) | 1.7609 | C(302)-H(302) | 0.9500 |
| S(11B)-C(301) | 1.7756 | C(303)-C(304) | 1.3707 |
| S(12B)-C(307) | 1.7566 | C(303)-H(303) | 0.9500 |
| N(9B)-C(313)  | 1.3367 | C(304)-C(305) | 1.4153 |
| N(9B)-C(317)  | 1.3585 | C(304)-H(304) | 0.9500 |
| N(10B)-C(322) | 1.3324 | C(305)-C(306) | 1.3903 |
| N(10B)-C(318) | 1.3680 | C(305)-H(305) | 0.9500 |
| N(11B)-C(323) | 1.3426 | C(306)-H(306) | 0.9500 |
| N(11B)-C(327) | 1.3446 | C(307)-C(312) | 1.3948 |
| N(12B)-C(332) | 1.3438 | C(307)-C(308) | 1.4143 |
| N(12B)-C(328) | 1.3716 | C(308)-C(309) | 1.3895 |



|               |        |               |        |
|---------------|--------|---------------|--------|
| C(308)-H(308) | 0.9500 | C(329)-H(329) | 0.9500 |
| C(309)-C(310) | 1.3766 | C(330)-C(331) | 1.3995 |
| C(309)-H(309) | 0.9500 | C(330)-H(330) | 0.9500 |
| C(310)-C(311) | 1.3774 | C(331)-C(332) | 1.3704 |
| C(310)-H(310) | 0.9500 | C(331)-H(331) | 0.9500 |
| C(311)-C(312) | 1.4016 | C(332)-H(332) | 0.9500 |
| C(311)-H(311) | 0.9500 | Th(4B)-N(13B) | 2.6063 |
| C(312)-H(312) | 0.9500 | Th(4B)-N(16B) | 2.6184 |
| C(313)-C(314) | 1.4128 | Th(4B)-N(15B) | 2.6246 |
| C(313)-H(313) | 0.9500 | Th(4B)-N(14B) | 2.6526 |
| C(314)-C(315) | 1.3537 | Th(4B)-S(15B) | 2.8301 |
| C(314)-H(314) | 0.9500 | Th(4B)-S(16B) | 2.8545 |
| C(315)-C(316) | 1.4078 | Th(4B)-S(13B) | 2.8563 |
| C(315)-H(315) | 0.9500 | Th(4B)-S(14B) | 2.8615 |
| C(316)-C(317) | 1.3503 | S(13B)-C(333) | 1.7790 |
| C(316)-H(316) | 0.9500 | S(14B)-C(339) | 1.7647 |
| C(317)-C(318) | 1.4899 | S(15B)-C(345) | 1.7687 |
| C(318)-C(319) | 1.3949 | S(16B)-C(351) | 1.7909 |
| C(319)-C(320) | 1.4118 | N(13B)-C(357) | 1.3097 |
| C(319)-H(319) | 0.9500 | N(13B)-C(361) | 1.3800 |
| C(320)-C(321) | 1.3664 | N(14B)-C(366) | 1.3208 |
| C(320)-H(320) | 0.9500 | N(14B)-C(362) | 1.3449 |
| C(321)-C(322) | 1.3703 | N(15B)-C(367) | 1.3435 |
| C(321)-H(321) | 0.9500 | N(15B)-C(371) | 1.3794 |
| C(322)-H(322) | 0.9500 | N(16B)-C(372) | 1.3494 |
| C(323)-C(324) | 1.3578 | N(16B)-C(376) | 1.3565 |
| C(323)-H(323) | 0.9500 | C(333)-C(338) | 1.3634 |
| C(324)-C(325) | 1.3880 | C(333)-C(334) | 1.4115 |
| C(324)-H(324) | 0.9500 | C(334)-C(335) | 1.3922 |
| C(325)-C(326) | 1.3570 | C(334)-H(334) | 0.9500 |
| C(325)-H(325) | 0.9500 | C(335)-C(336) | 1.4113 |
| C(326)-C(327) | 1.4205 | C(335)-H(335) | 0.9500 |
| C(326)-H(326) | 0.9500 | C(336)-C(337) | 1.3668 |
| C(327)-C(328) | 1.4838 | C(336)-H(336) | 0.9500 |
| C(328)-C(329) | 1.3682 | C(337)-C(338) | 1.3671 |
| C(329)-C(330) | 1.3647 | C(337)-H(337) | 0.9500 |

|                 |           |                 |           |
|-----------------|-----------|-----------------|-----------|
| C(338)-H(338)   | 0.9500    | C(357)-C(358)   | 1.4208    |
| C(339)-C(344)   | 1.3681    | C(357)-H(357)   | 0.9500    |
| C(339)-C(340)   | 1.4171    | C(358)-C(359)   | 1.3611    |
| C(340)-C(341)   | 1.3520    | C(358)-H(358)   | 0.9500    |
| C(340)-H(340)   | 0.9500    | C(359)-C(360)   | 1.3374    |
| C(341)-C(342)   | 1.4049    | C(359)-H(359)   | 0.9500    |
| C(341)-H(341)   | 0.9500    | C(360)-C(361)   | 1.3926    |
| C(342)-C(343)   | 1.4312    | C(360)-H(360)   | 0.9500    |
| C(342)-H(342)   | 0.9500    | C(361)-C(362)   | 1.4740    |
| C(343)-C(344)   | 1.3544    | C(362)-C(363)   | 1.4148    |
| C(343)-H(343)   | 0.9500    | C(363)-C(364)   | 1.3852    |
| C(344)-H(344)   | 0.9500    | C(363)-H(363)   | 0.9500    |
| C(345)-C(346)   | 1.4132    | C(364)-C(365)   | 1.3733    |
| C(345)-C(350)   | 1.4146    | C(364)-H(364)   | 0.9500    |
| C(346)-C(347)   | 1.4071    | C(365)-C(366)   | 1.3685    |
| C(346)-H(346)   | 0.9500    | C(365)-H(365)   | 0.9500    |
| C(347)-C(348)   | 1.4052    | C(366)-H(366)   | 0.9500    |
| C(347)-H(347)   | 0.9500    | C(367)-C(368)   | 1.3860    |
| C(348)-C(349)   | 1.3218    | C(367)-H(367)   | 0.9500    |
| C(348)-H(348)   | 0.9500    | C(368)-C(369)   | 1.4005    |
| C(349)-C(350)   | 1.4244    | C(368)-H(368)   | 0.9500    |
| C(349)-H(349)   | 0.9500    | C(369)-C(370)   | 1.3646    |
| C(350)-H(350)   | 0.9500    | C(369)-H(369)   | 0.9500    |
| C(351)-C(356)   | 1.3614    | C(370)-C(371)   | 1.4156    |
| C(351)-C(352)   | 1.4091    | C(370)-H(370)   | 0.9500    |
| C(352)-C(353)   | 1.3897    | C(371)-C(372)   | 1.4516    |
| C(352)-H(352)   | 0.9500    | C(372)-C(373)   | 1.4403    |
| C(353)-C(354)   | 1.3693    | C(373)-C(374)   | 1.3920    |
| C(353)-H(353)   | 0.9500    | C(373)-H(373)   | 0.9500    |
| C(354)-C(355)   | 1.3658    | C(374)-C(375)   | 1.3240    |
| C(354)-H(354)   | 0.9500    | C(374)-H(374)   | 0.9500    |
| C(355)-C(356)   | 1.4192    | C(375)-C(376)   | 1.3616    |
| C(355)-H(355)   | 0.9500    | C(375)-H(375)   | 0.9500    |
| C(356)-H(356)   | 0.9500    | C(376)-H(376)   | 0.9500    |
| N(4)-Th(1)-N(1) | 139.97(7) | N(4)-Th(1)-N(2) | 151.17(8) |

|                  |            |                   |            |
|------------------|------------|-------------------|------------|
| N(1)-Th(1)-N(2)  | 61.35(5)   | C(35)-N(3)-C(39)  | 120.26(17) |
| N(4)-Th(1)-N(3)  | 61.44(5)   | C(35)-N(3)-Th(1)  | 119.25(15) |
| N(1)-Th(1)-N(3)  | 151.45(8)  | C(39)-N(3)-Th(1)  | 119.95(11) |
| N(2)-Th(1)-N(3)  | 108.79(7)  | C(44)-N(4)-C(40)  | 117.85(15) |
| N(4)-Th(1)-S(3)  | 121.53(7)  | C(44)-N(4)-Th(1)  | 119.39(15) |
| N(1)-Th(1)-S(3)  | 79.26(6)   | C(40)-N(4)-Th(1)  | 122.27(13) |
| N(2)-Th(1)-S(3)  | 74.96(6)   | C(2)-C(1)-C(6)    | 117.84(16) |
| N(3)-Th(1)-S(3)  | 72.22(6)   | C(2)-C(1)-S(1)    | 118.74(19) |
| N(4)-Th(1)-S(4)  | 80.38(7)   | C(6)-C(1)-S(1)    | 123.1(2)   |
| N(1)-Th(1)-S(4)  | 120.92(7)  | C(3)-C(2)-C(1)    | 122.08(18) |
| N(2)-Th(1)-S(4)  | 70.80(6)   | C(3)-C(2)-H(2)    | 119.0      |
| N(3)-Th(1)-S(4)  | 74.43(6)   | C(1)-C(2)-H(2)    | 119.0      |
| S(3)-Th(1)-S(4)  | 120.11(7)  | C(2)-C(3)-C(4)    | 117.5(2)   |
| N(4)-Th(1)-S(1)  | 86.95(6)   | C(2)-C(3)-H(3)    | 121.3      |
| N(1)-Th(1)-S(1)  | 64.32(6)   | C(4)-C(3)-H(3)    | 121.3      |
| N(2)-Th(1)-S(1)  | 90.60(7)   | C(5)-C(4)-C(3)    | 121.3(2)   |
| N(3)-Th(1)-S(1)  | 144.19(7)  | C(5)-C(4)-H(4)    | 119.4      |
| S(3)-Th(1)-S(1)  | 143.30(7)  | C(3)-C(4)-H(4)    | 119.4      |
| S(4)-Th(1)-S(1)  | 84.62(6)   | C(4)-C(5)-C(6)    | 120.9(2)   |
| N(4)-Th(1)-S(2)  | 64.09(6)   | C(4)-C(5)-H(5)    | 119.6      |
| N(1)-Th(1)-S(2)  | 87.08(6)   | C(6)-C(5)-H(5)    | 119.6      |
| N(2)-Th(1)-S(2)  | 144.65(7)  | C(1)-C(6)-C(5)    | 120.02(19) |
| N(3)-Th(1)-S(2)  | 91.18(7)   | C(1)-C(6)-H(6)    | 120.0      |
| S(3)-Th(1)-S(2)  | 84.36(6)   | C(5)-C(6)-H(6)    | 120.0      |
| S(4)-Th(1)-S(2)  | 144.22(7)  | C(12)-C(7)-C(8)   | 118.99(16) |
| S(1)-Th(1)-S(2)  | 89.23(6)   | C(12)-C(7)-S(2)   | 123.5(2)   |
| C(1)-S(1)-Th(1)  | 120.86(18) | C(8)-C(7)-S(2)    | 117.30(18) |
| C(7)-S(2)-Th(1)  | 122.75(18) | C(9)-C(8)-C(7)    | 118.48(18) |
| C(13)-S(3)-Th(1) | 115.31(16) | C(9)-C(8)-H(8)    | 120.8      |
| C(19)-S(4)-Th(1) | 113.16(16) | C(7)-C(8)-H(8)    | 120.8      |
| C(29)-N(1)-C(25) | 117.74(15) | C(10)-C(9)-C(8)   | 121.74(19) |
| C(29)-N(1)-Th(1) | 122.46(14) | C(10)-C(9)-H(9)   | 119.1      |
| C(25)-N(1)-Th(1) | 119.35(16) | C(8)-C(9)-H(9)    | 119.1      |
| C(34)-N(2)-C(30) | 117.72(17) | C(9)-C(10)-C(11)  | 120.03(19) |
| C(34)-N(2)-Th(1) | 119.10(14) | C(9)-C(10)-H(10)  | 120.0      |
| C(30)-N(2)-Th(1) | 122.79(10) | C(11)-C(10)-H(10) | 120.0      |

|                   |            |                   |            |
|-------------------|------------|-------------------|------------|
| C(12)-C(11)-C(10) | 118.52(19) | C(24)-C(23)-C(22) | 118.2(2)   |
| C(12)-C(11)-H(11) | 120.7      | C(24)-C(23)-H(23) | 120.9      |
| C(10)-C(11)-H(11) | 120.7      | C(22)-C(23)-H(23) | 120.9      |
| C(11)-C(12)-C(7)  | 122.21(19) | C(23)-C(24)-C(19) | 121.3(2)   |
| C(11)-C(12)-H(12) | 118.9      | C(23)-C(24)-H(24) | 119.3      |
| C(7)-C(12)-H(12)  | 118.9      | C(19)-C(24)-H(24) | 119.3      |
| C(14)-C(13)-C(18) | 117.54(16) | C(26)-C(25)-N(1)  | 123.05(19) |
| C(14)-C(13)-S(3)  | 122.5(2)   | C(26)-C(25)-H(25) | 118.5      |
| C(18)-C(13)-S(3)  | 119.79(19) | N(1)-C(25)-H(25)  | 118.5      |
| C(13)-C(14)-C(15) | 121.21(18) | C(25)-C(26)-C(27) | 121.2(2)   |
| C(13)-C(14)-H(14) | 119.4      | C(25)-C(26)-H(26) | 119.4      |
| C(15)-C(14)-H(14) | 119.4      | C(27)-C(26)-H(26) | 119.4      |
| C(16)-C(15)-C(14) | 120.62(19) | C(26)-C(27)-C(28) | 118.89(19) |
| C(16)-C(15)-H(15) | 119.7      | C(26)-C(27)-H(27) | 120.6      |
| C(14)-C(15)-H(15) | 119.7      | C(28)-C(27)-H(27) | 120.6      |
| C(15)-C(16)-C(17) | 119.53(19) | C(29)-C(28)-C(27) | 115.74(17) |
| C(15)-C(16)-H(16) | 120.2      | C(29)-C(28)-H(28) | 122.1      |
| C(17)-C(16)-H(16) | 120.2      | C(27)-C(28)-H(28) | 122.1      |
| C(16)-C(17)-C(18) | 120.9(2)   | N(1)-C(29)-C(28)  | 123.11(17) |
| C(16)-C(17)-H(17) | 119.5      | N(1)-C(29)-C(30)  | 118.37(14) |
| C(18)-C(17)-H(17) | 119.5      | C(28)-C(29)-C(30) | 118.46(18) |
| C(17)-C(18)-C(13) | 120.04(19) | N(2)-C(30)-C(31)  | 121.86(16) |
| C(17)-C(18)-H(18) | 120.0      | N(2)-C(30)-C(29)  | 114.38(13) |
| C(13)-C(18)-H(18) | 120.0      | C(31)-C(30)-C(29) | 123.6(2)   |
| C(20)-C(19)-C(24) | 118.83(17) | C(30)-C(31)-C(32) | 118.84(19) |
| C(20)-C(19)-S(4)  | 118.94(19) | C(30)-C(31)-H(31) | 120.6      |
| C(24)-C(19)-S(4)  | 121.9(2)   | C(32)-C(31)-H(31) | 120.6      |
| C(19)-C(20)-C(21) | 119.51(19) | C(33)-C(32)-C(31) | 120.4(2)   |
| C(19)-C(20)-H(20) | 120.2      | C(33)-C(32)-H(32) | 119.8      |
| C(21)-C(20)-H(20) | 120.2      | C(31)-C(32)-H(32) | 119.8      |
| C(22)-C(21)-C(20) | 120.5(2)   | C(32)-C(33)-C(34) | 118.27(19) |
| C(22)-C(21)-H(21) | 119.8      | C(32)-C(33)-H(33) | 120.9      |
| C(20)-C(21)-H(21) | 119.8      | C(34)-C(33)-H(33) | 120.9      |
| C(21)-C(22)-C(23) | 121.3(2)   | N(2)-C(34)-C(33)  | 122.61(18) |
| C(21)-C(22)-H(22) | 119.4      | N(2)-C(34)-H(34)  | 118.7      |
| C(23)-C(22)-H(22) | 119.4      | C(33)-C(34)-H(34) | 118.7      |

|                   |            |                  |            |
|-------------------|------------|------------------|------------|
| N(3)-C(35)-C(36)  | 122.04(18) | N(5)-Th(2)-S(7)  | 78.89(6)   |
| N(3)-C(35)-H(35)  | 119.0      | N(8)-Th(2)-S(7)  | 121.78(7)  |
| C(36)-C(35)-H(35) | 119.0      | N(7)-Th(2)-S(7)  | 72.86(6)   |
| C(37)-C(36)-C(35) | 119.11(19) | N(6)-Th(2)-S(7)  | 73.22(6)   |
| C(37)-C(36)-H(36) | 120.4      | N(5)-Th(2)-S(8)  | 121.11(7)  |
| C(35)-C(36)-H(36) | 120.4      | N(8)-Th(2)-S(8)  | 80.45(6)   |
| C(36)-C(37)-C(38) | 119.60(19) | N(7)-Th(2)-S(8)  | 73.83(6)   |
| C(36)-C(37)-H(37) | 120.2      | N(6)-Th(2)-S(8)  | 72.05(6)   |
| C(38)-C(37)-H(37) | 120.2      | S(7)-Th(2)-S(8)  | 120.00(7)  |
| C(37)-C(38)-C(39) | 120.19(18) | N(5)-Th(2)-S(5)  | 65.29(6)   |
| C(37)-C(38)-H(38) | 119.9      | N(8)-Th(2)-S(5)  | 86.07(6)   |
| C(39)-C(38)-H(38) | 119.9      | N(7)-Th(2)-S(5)  | 142.96(7)  |
| N(3)-C(39)-C(38)  | 118.64(15) | N(6)-Th(2)-S(5)  | 92.32(7)   |
| N(3)-C(39)-C(40)  | 117.67(14) | S(7)-Th(2)-S(5)  | 143.88(7)  |
| C(38)-C(39)-C(40) | 123.68(18) | S(8)-Th(2)-S(5)  | 84.43(6)   |
| N(4)-C(40)-C(41)  | 122.18(16) | N(5)-Th(2)-S(6)  | 87.50(6)   |
| N(4)-C(40)-C(39)  | 117.95(16) | N(8)-Th(2)-S(6)  | 63.67(6)   |
| C(41)-C(40)-C(39) | 119.86(17) | N(7)-Th(2)-S(6)  | 91.00(7)   |
| C(42)-C(41)-C(40) | 117.38(18) | N(6)-Th(2)-S(6)  | 143.85(7)  |
| C(42)-C(41)-H(41) | 121.3      | S(7)-Th(2)-S(6)  | 84.42(6)   |
| C(40)-C(41)-H(41) | 121.3      | S(8)-Th(2)-S(6)  | 143.94(7)  |
| C(41)-C(42)-C(43) | 120.69(18) | S(5)-Th(2)-S(6)  | 89.38(6)   |
| C(41)-C(42)-H(42) | 119.7      | C(45)-S(5)-Th(2) | 120.63(18) |
| C(43)-C(42)-H(42) | 119.7      | C(51)-S(6)-Th(2) | 120.92(17) |
| C(44)-C(43)-C(42) | 116.43(18) | C(57)-S(7)-Th(2) | 115.62(17) |
| C(44)-C(43)-H(43) | 121.8      | C(63)-S(8)-Th(2) | 111.36(15) |
| C(42)-C(43)-H(43) | 121.8      | C(73)-N(5)-C(69) | 117.20(15) |
| N(4)-C(44)-C(43)  | 125.45(19) | C(73)-N(5)-Th(2) | 122.73(13) |
| N(4)-C(44)-H(44)  | 117.3      | C(69)-N(5)-Th(2) | 119.51(15) |
| C(43)-C(44)-H(44) | 117.3      | C(74)-N(6)-C(78) | 118.07(17) |
| N(5)-Th(2)-N(8)   | 139.95(7)  | C(74)-N(6)-Th(2) | 121.76(11) |
| N(5)-Th(2)-N(7)   | 151.72(8)  | C(78)-N(6)-Th(2) | 119.60(15) |
| N(8)-Th(2)-N(7)   | 61.32(5)   | C(79)-N(7)-C(83) | 117.70(16) |
| N(5)-Th(2)-N(6)   | 60.91(5)   | C(79)-N(7)-Th(2) | 119.14(14) |
| N(8)-Th(2)-N(6)   | 152.47(8)  | C(83)-N(7)-Th(2) | 123.00(10) |
| N(7)-Th(2)-N(6)   | 108.38(7)  | C(88)-N(8)-C(84) | 118.06(16) |

|                   |            |                   |            |
|-------------------|------------|-------------------|------------|
| C(88)-N(8)-Th(2)  | 119.34(16) | C(51)-C(56)-H(56) | 120.1      |
| C(84)-N(8)-Th(2)  | 121.95(14) | C(55)-C(56)-H(56) | 120.1      |
| C(50)-C(45)-C(46) | 117.15(16) | C(62)-C(57)-C(58) | 118.08(16) |
| C(50)-C(45)-S(5)  | 123.2(2)   | C(62)-C(57)-S(7)  | 122.2(2)   |
| C(46)-C(45)-S(5)  | 119.15(19) | C(58)-C(57)-S(7)  | 119.38(19) |
| C(47)-C(46)-C(45) | 119.40(18) | C(59)-C(58)-C(57) | 119.07(18) |
| C(47)-C(46)-H(46) | 120.3      | C(59)-C(58)-H(58) | 120.5      |
| C(45)-C(46)-H(46) | 120.3      | C(57)-C(58)-H(58) | 120.5      |
| C(48)-C(47)-C(46) | 121.6(2)   | C(60)-C(59)-C(58) | 121.00(19) |
| C(48)-C(47)-H(47) | 119.2      | C(60)-C(59)-H(59) | 119.5      |
| C(46)-C(47)-H(47) | 119.2      | C(58)-C(59)-H(59) | 119.5      |
| C(49)-C(48)-C(47) | 119.3(2)   | C(59)-C(60)-C(61) | 121.06(19) |
| C(49)-C(48)-H(48) | 120.4      | C(59)-C(60)-H(60) | 119.5      |
| C(47)-C(48)-H(48) | 120.4      | C(61)-C(60)-H(60) | 119.5      |
| C(48)-C(49)-C(50) | 122.0(2)   | C(60)-C(61)-C(62) | 119.02(19) |
| C(48)-C(49)-H(49) | 119.0      | C(60)-C(61)-H(61) | 120.5      |
| C(50)-C(49)-H(49) | 119.0      | C(62)-C(61)-H(61) | 120.5      |
| C(49)-C(50)-C(45) | 120.43(18) | C(61)-C(62)-C(57) | 121.72(19) |
| C(49)-C(50)-H(50) | 119.8      | C(61)-C(62)-H(62) | 119.1      |
| C(45)-C(50)-H(50) | 119.8      | C(57)-C(62)-H(62) | 119.1      |
| C(56)-C(51)-C(52) | 119.75(17) | C(68)-C(63)-C(64) | 118.70(17) |
| C(56)-C(51)-S(6)  | 122.3(2)   | C(68)-C(63)-S(8)  | 122.57(19) |
| C(52)-C(51)-S(6)  | 117.77(18) | C(64)-C(63)-S(8)  | 118.62(18) |
| C(53)-C(52)-C(51) | 120.00(18) | C(63)-C(64)-C(65) | 120.59(18) |
| C(53)-C(52)-H(52) | 120.0      | C(63)-C(64)-H(64) | 119.7      |
| C(51)-C(52)-H(52) | 120.0      | C(65)-C(64)-H(64) | 119.7      |
| C(54)-C(53)-C(52) | 120.53(19) | C(66)-C(65)-C(64) | 119.67(19) |
| C(54)-C(53)-H(53) | 119.7      | C(66)-C(65)-H(65) | 120.2      |
| C(52)-C(53)-H(53) | 119.7      | C(64)-C(65)-H(65) | 120.2      |
| C(53)-C(54)-C(55) | 121.04(19) | C(65)-C(66)-C(67) | 118.43(19) |
| C(53)-C(54)-H(54) | 119.5      | C(65)-C(66)-H(66) | 120.8      |
| C(55)-C(54)-H(54) | 119.5      | C(67)-C(66)-H(66) | 120.8      |
| C(54)-C(55)-C(56) | 118.81(19) | C(68)-C(67)-C(66) | 122.5(2)   |
| C(54)-C(55)-H(55) | 120.6      | C(68)-C(67)-H(67) | 118.8      |
| C(56)-C(55)-H(55) | 120.6      | C(66)-C(67)-H(67) | 118.8      |
| C(51)-C(56)-C(55) | 119.83(18) | C(67)-C(68)-C(63) | 119.9(2)   |

|                   |            |                   |            |
|-------------------|------------|-------------------|------------|
| C(67)-C(68)-H(68) | 120.1      | C(79)-C(80)-H(80) | 120.3      |
| C(63)-C(68)-H(68) | 120.1      | C(81)-C(80)-H(80) | 120.3      |
| C(70)-C(69)-N(5)  | 123.93(19) | C(82)-C(81)-C(80) | 116.45(18) |
| C(70)-C(69)-H(69) | 118.0      | C(82)-C(81)-H(81) | 121.8      |
| N(5)-C(69)-H(69)  | 118.0      | C(80)-C(81)-H(81) | 121.8      |
| C(69)-C(70)-C(71) | 118.92(19) | C(83)-C(82)-C(81) | 122.94(19) |
| C(69)-C(70)-H(70) | 120.5      | C(83)-C(82)-H(82) | 118.5      |
| C(71)-C(70)-H(70) | 120.5      | C(81)-C(82)-H(82) | 118.5      |
| C(72)-C(71)-C(70) | 118.79(19) | C(82)-C(83)-N(7)  | 119.98(16) |
| C(72)-C(71)-H(71) | 120.6      | C(82)-C(83)-C(84) | 124.60(17) |
| C(70)-C(71)-H(71) | 120.6      | N(7)-C(83)-C(84)  | 115.42(14) |
| C(71)-C(72)-C(73) | 121.03(18) | N(8)-C(84)-C(85)  | 121.88(16) |
| C(71)-C(72)-H(72) | 119.5      | N(8)-C(84)-C(83)  | 117.29(17) |
| C(73)-C(72)-H(72) | 119.5      | C(85)-C(84)-C(83) | 120.78(17) |
| N(5)-C(73)-C(72)  | 120.04(16) | C(86)-C(85)-C(84) | 118.86(18) |
| N(5)-C(73)-C(74)  | 115.82(16) | C(86)-C(85)-H(85) | 120.6      |
| C(72)-C(73)-C(74) | 124.13(18) | C(84)-C(85)-H(85) | 120.6      |
| N(6)-C(74)-C(75)  | 121.38(16) | C(85)-C(86)-C(87) | 120.34(19) |
| N(6)-C(74)-C(73)  | 118.03(14) | C(85)-C(86)-H(86) | 119.8      |
| C(75)-C(74)-C(73) | 120.55(19) | C(87)-C(86)-H(86) | 119.8      |
| C(74)-C(75)-C(76) | 120.48(19) | C(88)-C(87)-C(86) | 115.90(19) |
| C(74)-C(75)-H(75) | 119.8      | C(88)-C(87)-H(87) | 122.1      |
| C(76)-C(75)-H(75) | 119.8      | C(86)-C(87)-H(87) | 122.1      |
| C(75)-C(76)-C(77) | 119.35(18) | N(8)-C(88)-C(87)  | 124.7(2)   |
| C(75)-C(76)-H(76) | 120.3      | N(8)-C(88)-H(88)  | 117.6      |
| C(77)-C(76)-H(76) | 120.3      | C(87)-C(88)-H(88) | 117.6      |
| C(78)-C(77)-C(76) | 116.47(18) | N(10)-Th(3)-N(12) | 150.59(8)  |
| C(78)-C(77)-H(77) | 121.8      | N(10)-Th(3)-N(9)  | 61.29(5)   |
| C(76)-C(77)-H(77) | 121.8      | N(12)-Th(3)-N(9)  | 141.59(7)  |
| C(77)-C(78)-N(6)  | 124.11(18) | N(10)-Th(3)-N(11) | 106.25(7)  |
| C(77)-C(78)-H(78) | 117.9      | N(12)-Th(3)-N(11) | 60.98(5)   |
| N(6)-C(78)-H(78)  | 117.9      | N(9)-Th(3)-N(11)  | 152.07(8)  |
| N(7)-C(79)-C(80)  | 123.49(18) | N(10)-Th(3)-S(12) | 72.10(6)   |
| N(7)-C(79)-H(79)  | 118.3      | N(12)-Th(3)-S(12) | 78.63(6)   |
| C(80)-C(79)-H(79) | 118.3      | N(9)-Th(3)-S(12)  | 120.80(7)  |
| C(79)-C(80)-C(81) | 119.31(19) | N(11)-Th(3)-S(12) | 72.49(6)   |

|                     |            |                      |            |
|---------------------|------------|----------------------|------------|
| N(10)-Th(3)-S(11)   | 73.07(6)   | C(90)-C(89)-S(9)     | 119.19(19) |
| N(12)-Th(3)-S(11)   | 121.45(7)  | C(91)-C(90)-C(89)    | 122.30(19) |
| N(9)-Th(3)-S(11)    | 79.61(6)   | C(91)-C(90)-H(90)    | 118.8      |
| N(11)-Th(3)-S(11)   | 72.66(6)   | C(89)-C(90)-H(90)    | 118.8      |
| S(12)-Th(3)-S(11)   | 120.14(7)  | C(90)-C(91)-C(92)    | 119.3(2)   |
| N(10)-Th(3)-S(10)   | 145.14(7)  | C(90)-C(91)-H(91)    | 120.3      |
| N(12)-Th(3)-S(10)   | 64.26(6)   | C(92)-C(91)-H(91)    | 120.3      |
| N(9)-Th(3)-S(10)    | 88.81(6)   | C(91)-C(92)-C(93)    | 120.33(19) |
| N(11)-Th(3)-S(10)   | 91.94(7)   | C(91)-C(92)-H(92)    | 119.8      |
| S(12)-Th(3)-S(10)   | 142.66(7)  | C(93)-C(92)-H(92)    | 119.8      |
| S(11)-Th(3)-S(10)   | 84.88(7)   | C(94)-C(93)-C(92)    | 119.67(19) |
| N(10)-Th(3)-S(9)    | 92.30(7)   | C(94)-C(93)-H(93)    | 120.2      |
| N(12)-Th(3)-S(9)    | 87.85(6)   | C(92)-C(93)-H(93)    | 120.2      |
| N(9)-Th(3)-S(9)     | 63.80(6)   | C(93)-C(94)-C(89)    | 120.73(19) |
| N(11)-Th(3)-S(9)    | 144.10(7)  | C(93)-C(94)-H(94)    | 119.6      |
| S(12)-Th(3)-S(9)    | 84.95(6)   | C(89)-C(94)-H(94)    | 119.6      |
| S(11)-Th(3)-S(9)    | 143.10(7)  | C(96)-C(95)-C(100)   | 118.41(16) |
| S(10)-Th(3)-S(9)    | 89.49(7)   | C(96)-C(95)-S(10)    | 120.85(19) |
| C(89)-S(9)-Th(3)    | 121.84(18) | C(100)-C(95)-S(10)   | 120.74(19) |
| C(95)-S(10)-Th(3)   | 120.97(18) | C(95)-C(96)-C(97)    | 124.1(2)   |
| C(101)-S(11)-Th(3)  | 114.80(16) | C(95)-C(96)-H(96)    | 118.0      |
| C(107)-S(12)-Th(3)  | 113.01(16) | C(97)-C(96)-H(96)    | 118.0      |
| C(113)-N(9)-C(117)  | 117.71(16) | C(98)-C(97)-C(96)    | 118.99(19) |
| C(113)-N(9)-Th(3)   | 118.02(15) | C(98)-C(97)-H(97)    | 120.5      |
| C(117)-N(9)-Th(3)   | 123.60(14) | C(96)-C(97)-H(97)    | 120.5      |
| C(122)-N(10)-C(118) | 115.78(15) | C(99)-C(98)-C(97)    | 119.63(19) |
| C(122)-N(10)-Th(3)  | 122.06(14) | C(99)-C(98)-H(98)    | 120.2      |
| C(118)-N(10)-Th(3)  | 122.15(11) | C(97)-C(98)-H(98)    | 120.2      |
| C(123)-N(11)-C(127) | 115.56(15) | C(98)-C(99)-C(100)   | 122.92(19) |
| C(123)-N(11)-Th(3)  | 121.60(15) | C(98)-C(99)-H(99)    | 118.5      |
| C(127)-N(11)-Th(3)  | 122.77(10) | C(100)-C(99)-H(99)   | 118.5      |
| C(132)-N(12)-C(128) | 116.95(15) | C(99)-C(100)-C(95)   | 115.88(17) |
| C(132)-N(12)-Th(3)  | 119.10(15) | C(99)-C(100)-H(100)  | 122.1      |
| C(128)-N(12)-Th(3)  | 123.48(13) | C(95)-C(100)-H(100)  | 122.1      |
| C(94)-C(89)-C(90)   | 117.56(16) | C(102)-C(101)-C(106) | 118.69(16) |
| C(94)-C(89)-S(9)    | 123.2(2)   | C(102)-C(101)-S(11)  | 119.91(19) |



|                      |            |                      |            |
|----------------------|------------|----------------------|------------|
| C(106)-C(101)-S(11)  | 121.40(19) | C(114)-C(113)-H(113) | 118.9      |
| C(101)-C(102)-C(103) | 122.21(19) | C(115)-C(114)-C(113) | 119.73(19) |
| C(101)-C(102)-H(102) | 118.9      | C(115)-C(114)-H(114) | 120.1      |
| C(103)-C(102)-H(102) | 118.9      | C(113)-C(114)-H(114) | 120.1      |
| C(104)-C(103)-C(102) | 120.3(2)   | C(114)-C(115)-C(116) | 117.31(18) |
| C(104)-C(103)-H(103) | 119.9      | C(114)-C(115)-H(115) | 121.3      |
| C(102)-C(103)-H(103) | 119.9      | C(116)-C(115)-H(115) | 121.3      |
| C(103)-C(104)-C(105) | 118.25(18) | C(117)-C(116)-C(115) | 120.83(18) |
| C(103)-C(104)-H(104) | 120.9      | C(117)-C(116)-H(116) | 119.6      |
| C(105)-C(104)-H(104) | 120.9      | C(115)-C(116)-H(116) | 119.6      |
| C(106)-C(105)-C(104) | 120.94(19) | C(116)-C(117)-N(9)   | 122.20(17) |
| C(106)-C(105)-H(105) | 119.5      | C(116)-C(117)-C(118) | 123.31(18) |
| C(104)-C(105)-H(105) | 119.5      | N(9)-C(117)-C(118)   | 114.28(17) |
| C(105)-C(106)-C(101) | 119.53(18) | N(10)-C(118)-C(119)  | 121.69(15) |
| C(105)-C(106)-H(106) | 120.2      | N(10)-C(118)-C(117)  | 117.47(13) |
| C(101)-C(106)-H(106) | 120.2      | C(119)-C(118)-C(117) | 120.83(17) |
| C(112)-C(107)-C(108) | 117.50(16) | C(118)-C(119)-C(120) | 120.09(18) |
| C(112)-C(107)-S(12)  | 120.48(19) | C(118)-C(119)-H(119) | 120.0      |
| C(108)-C(107)-S(12)  | 122.02(19) | C(120)-C(119)-H(119) | 120.0      |
| C(109)-C(108)-C(107) | 119.70(18) | C(121)-C(120)-C(119) | 117.24(18) |
| C(109)-C(108)-H(108) | 120.2      | C(121)-C(120)-H(120) | 121.4      |
| C(107)-C(108)-H(108) | 120.2      | C(119)-C(120)-H(120) | 121.4      |
| C(110)-C(109)-C(108) | 122.1(2)   | C(120)-C(121)-C(122) | 119.13(19) |
| C(110)-C(109)-H(109) | 118.9      | C(120)-C(121)-H(121) | 120.4      |
| C(108)-C(109)-H(109) | 118.9      | C(122)-C(121)-H(121) | 120.4      |
| C(109)-C(110)-C(111) | 118.9(2)   | N(10)-C(122)-C(121)  | 126.04(19) |
| C(109)-C(110)-H(110) | 120.6      | N(10)-C(122)-H(122)  | 117.0      |
| C(111)-C(110)-H(110) | 120.6      | C(121)-C(122)-H(122) | 117.0      |
| C(110)-C(111)-C(112) | 120.1(2)   | N(11)-C(123)-C(124)  | 126.50(19) |
| C(110)-C(111)-H(111) | 119.9      | N(11)-C(123)-H(123)  | 116.8      |
| C(112)-C(111)-H(111) | 119.9      | C(124)-C(123)-H(123) | 116.8      |
| C(107)-C(112)-C(111) | 121.50(19) | C(123)-C(124)-C(125) | 116.58(19) |
| C(107)-C(112)-H(112) | 119.2      | C(123)-C(124)-H(124) | 121.7      |
| C(111)-C(112)-H(112) | 119.2      | C(125)-C(124)-H(124) | 121.7      |
| N(9)-C(113)-C(114)   | 122.18(18) | C(126)-C(125)-C(124) | 120.76(19) |
| N(9)-C(113)-H(113)   | 118.9      | C(126)-C(125)-H(125) | 119.6      |

|                      |            |                      |            |
|----------------------|------------|----------------------|------------|
| C(124)-C(125)-H(125) | 119.6      | S(15)-Th(4)-S(16)    | 120.37(7)  |
| C(125)-C(126)-C(127) | 117.94(18) | N(13)-Th(4)-S(13)    | 63.01(6)   |
| C(125)-C(126)-H(126) | 121.0      | N(16)-Th(4)-S(13)    | 87.51(6)   |
| C(127)-C(126)-H(126) | 121.0      | N(15)-Th(4)-S(13)    | 144.67(7)  |
| N(11)-C(127)-C(126)  | 122.64(16) | N(14)-Th(4)-S(13)    | 90.78(7)   |
| N(11)-C(127)-C(128)  | 117.67(14) | S(15)-Th(4)-S(13)    | 142.45(7)  |
| C(126)-C(127)-C(128) | 119.56(19) | S(16)-Th(4)-S(13)    | 84.48(6)   |
| C(129)-C(128)-N(12)  | 120.33(16) | N(13)-Th(4)-S(14)    | 87.16(6)   |
| C(129)-C(128)-C(127) | 125.38(18) | N(16)-Th(4)-S(14)    | 64.73(6)   |
| N(12)-C(128)-C(127)  | 114.21(16) | N(15)-Th(4)-S(14)    | 90.77(7)   |
| C(130)-C(129)-C(128) | 123.53(19) | N(14)-Th(4)-S(14)    | 143.63(7)  |
| C(130)-C(129)-H(129) | 118.2      | S(15)-Th(4)-S(14)    | 83.86(6)   |
| C(128)-C(129)-H(129) | 118.2      | S(16)-Th(4)-S(14)    | 143.61(7)  |
| C(129)-C(130)-C(131) | 115.56(18) | S(13)-Th(4)-S(14)    | 90.93(7)   |
| C(129)-C(130)-H(130) | 122.2      | C(133)-S(13)-Th(4)   | 122.69(18) |
| C(131)-C(130)-H(130) | 122.2      | C(139)-S(14)-Th(4)   | 119.76(17) |
| C(132)-C(131)-C(130) | 119.88(19) | C(145)-S(15)-Th(4)   | 112.33(16) |
| C(132)-C(131)-H(131) | 120.1      | C(151)-S(16)-Th(4)   | 113.04(16) |
| C(130)-C(131)-H(131) | 120.1      | C(157)-N(13)-C(161)  | 117.07(15) |
| N(12)-C(132)-C(131)  | 123.73(19) | C(157)-N(13)-Th(4)   | 120.16(15) |
| N(12)-C(132)-H(132)  | 118.1      | C(161)-N(13)-Th(4)   | 122.44(13) |
| C(131)-C(132)-H(132) | 118.1      | C(166)-N(14)-C(162)  | 117.31(17) |
| N(13)-Th(4)-N(16)    | 139.37(7)  | C(166)-N(14)-Th(4)   | 120.46(15) |
| N(13)-Th(4)-N(15)    | 152.31(8)  | C(162)-N(14)-Th(4)   | 121.85(11) |
| N(16)-Th(4)-N(15)    | 61.66(5)   | C(167)-N(15)-C(171)  | 117.77(15) |
| N(13)-Th(4)-N(14)    | 61.66(5)   | C(167)-N(15)-Th(4)   | 120.86(14) |
| N(16)-Th(4)-N(14)    | 151.63(8)  | C(171)-N(15)-Th(4)   | 121.36(10) |
| N(15)-Th(4)-N(14)    | 108.03(7)  | C(172)-N(16)-C(176)  | 116.41(15) |
| N(13)-Th(4)-S(15)    | 79.57(6)   | C(172)-N(16)-Th(4)   | 122.54(12) |
| N(16)-Th(4)-S(15)    | 122.54(7)  | C(176)-N(16)-Th(4)   | 120.95(14) |
| N(15)-Th(4)-S(15)    | 72.75(6)   | C(138)-C(133)-C(134) | 118.48(16) |
| N(14)-Th(4)-S(15)    | 73.04(6)   | C(138)-C(133)-S(13)  | 124.8(2)   |
| N(13)-Th(4)-S(16)    | 121.63(7)  | C(134)-C(133)-S(13)  | 116.54(18) |
| N(16)-Th(4)-S(16)    | 78.99(6)   | C(135)-C(134)-C(133) | 120.03(18) |
| N(15)-Th(4)-S(16)    | 73.61(6)   | C(135)-C(134)-H(134) | 120.0      |
| N(14)-Th(4)-S(16)    | 72.66(6)   | C(133)-C(134)-H(134) | 120.0      |

|                      |            |                      |            |
|----------------------|------------|----------------------|------------|
| C(134)-C(135)-C(136) | 119.88(19) | C(148)-C(147)-C(146) | 117.16(19) |
| C(134)-C(135)-H(135) | 120.1      | C(148)-C(147)-H(147) | 121.4      |
| C(136)-C(135)-H(135) | 120.1      | C(146)-C(147)-H(147) | 121.4      |
| C(137)-C(136)-C(135) | 118.10(19) | C(149)-C(148)-C(147) | 121.9(2)   |
| C(137)-C(136)-H(136) | 120.9      | C(149)-C(148)-H(148) | 119.1      |
| C(135)-C(136)-H(136) | 120.9      | C(147)-C(148)-H(148) | 119.1      |
| C(136)-C(137)-C(138) | 122.0(2)   | C(148)-C(149)-C(150) | 122.8(2)   |
| C(136)-C(137)-H(137) | 119.0      | C(148)-C(149)-H(149) | 118.6      |
| C(138)-C(137)-H(137) | 119.0      | C(150)-C(149)-H(149) | 118.6      |
| C(133)-C(138)-C(137) | 121.40(19) | C(145)-C(150)-C(149) | 117.41(18) |
| C(133)-C(138)-H(138) | 119.3      | C(145)-C(150)-H(150) | 121.3      |
| C(137)-C(138)-H(138) | 119.3      | C(149)-C(150)-H(150) | 121.3      |
| C(144)-C(139)-C(140) | 114.61(17) | C(156)-C(151)-C(152) | 120.29(16) |
| C(144)-C(139)-S(14)  | 125.5(2)   | C(156)-C(151)-S(16)  | 121.11(19) |
| C(140)-C(139)-S(14)  | 119.42(19) | C(152)-C(151)-S(16)  | 118.60(18) |
| C(141)-C(140)-C(139) | 123.11(19) | C(153)-C(152)-C(151) | 119.10(18) |
| C(141)-C(140)-H(140) | 118.4      | C(153)-C(152)-H(152) | 120.5      |
| C(139)-C(140)-H(140) | 118.4      | C(151)-C(152)-H(152) | 120.5      |
| C(140)-C(141)-C(142) | 120.84(19) | C(154)-C(153)-C(152) | 120.72(19) |
| C(140)-C(141)-H(141) | 119.6      | C(154)-C(153)-H(153) | 119.6      |
| C(142)-C(141)-H(141) | 119.6      | C(152)-C(153)-H(153) | 119.6      |
| C(141)-C(142)-C(143) | 116.87(18) | C(155)-C(154)-C(153) | 120.26(19) |
| C(141)-C(142)-H(142) | 121.6      | C(155)-C(154)-H(154) | 119.9      |
| C(143)-C(142)-H(142) | 121.6      | C(153)-C(154)-H(154) | 119.9      |
| C(144)-C(143)-C(142) | 119.19(19) | C(154)-C(155)-C(156) | 120.27(19) |
| C(144)-C(143)-H(143) | 120.4      | C(154)-C(155)-H(155) | 119.9      |
| C(142)-C(143)-H(143) | 120.4      | C(156)-C(155)-H(155) | 119.9      |
| C(143)-C(144)-C(139) | 125.32(19) | C(151)-C(156)-C(155) | 119.33(18) |
| C(143)-C(144)-H(144) | 117.3      | C(151)-C(156)-H(156) | 120.3      |
| C(139)-C(144)-H(144) | 117.3      | C(155)-C(156)-H(156) | 120.3      |
| C(146)-C(145)-C(150) | 118.73(16) | N(13)-C(157)-C(158)  | 123.28(19) |
| C(146)-C(145)-S(15)  | 120.41(19) | N(13)-C(157)-H(157)  | 118.4      |
| C(150)-C(145)-S(15)  | 120.83(19) | C(158)-C(157)-H(157) | 118.4      |
| C(147)-C(146)-C(145) | 121.91(18) | C(159)-C(158)-C(157) | 117.65(19) |
| C(147)-C(146)-H(146) | 119.0      | C(159)-C(158)-H(158) | 121.2      |
| C(145)-C(146)-H(146) | 119.0      | C(157)-C(158)-H(158) | 121.2      |

|                      |            |                      |            |
|----------------------|------------|----------------------|------------|
| C(160)-C(159)-C(158) | 120.91(19) | N(15)-C(171)-C(170)  | 120.65(17) |
| C(160)-C(159)-H(159) | 119.5      | N(15)-C(171)-C(172)  | 116.73(15) |
| C(158)-C(159)-H(159) | 119.5      | C(170)-C(171)-C(172) | 122.1(2)   |
| C(159)-C(160)-C(161) | 119.25(19) | N(16)-C(172)-C(173)  | 121.27(16) |
| C(159)-C(160)-H(160) | 120.4      | N(16)-C(172)-C(171)  | 117.10(14) |
| C(161)-C(160)-H(160) | 120.4      | C(173)-C(172)-C(171) | 121.62(17) |
| N(13)-C(161)-C(160)  | 121.79(16) | C(174)-C(173)-C(172) | 118.77(18) |
| N(13)-C(161)-C(162)  | 115.80(18) | C(174)-C(173)-H(173) | 120.6      |
| C(160)-C(161)-C(162) | 122.20(18) | C(172)-C(173)-H(173) | 120.6      |
| N(14)-C(162)-C(163)  | 120.05(16) | C(175)-C(174)-C(173) | 117.96(19) |
| N(14)-C(162)-C(161)  | 117.07(14) | C(175)-C(174)-H(174) | 121.0      |
| C(163)-C(162)-C(161) | 122.88(17) | C(173)-C(174)-H(174) | 121.0      |
| C(164)-C(163)-C(162) | 120.65(18) | C(174)-C(175)-C(176) | 122.1(2)   |
| C(164)-C(163)-H(163) | 119.7      | C(174)-C(175)-H(175) | 119.0      |
| C(162)-C(163)-H(163) | 119.7      | C(176)-C(175)-H(175) | 119.0      |
| C(165)-C(164)-C(163) | 117.65(18) | N(16)-C(176)-C(175)  | 123.41(19) |
| C(165)-C(164)-H(164) | 121.2      | N(16)-C(176)-H(176)  | 118.3      |
| C(163)-C(164)-H(164) | 121.2      | C(175)-C(176)-H(176) | 118.3      |
| C(166)-C(165)-C(164) | 118.11(19) | N(4B)-Th(1B)-N(1B)   | 140.0      |
| C(166)-C(165)-H(165) | 120.9      | N(4B)-Th(1B)-N(2B)   | 151.2      |
| C(164)-C(165)-H(165) | 120.9      | N(1B)-Th(1B)-N(2B)   | 61.4       |
| N(14)-C(166)-C(165)  | 125.99(19) | N(4B)-Th(1B)-N(3B)   | 61.4       |
| N(14)-C(166)-H(166)  | 117.0      | N(1B)-Th(1B)-N(3B)   | 151.5      |
| C(165)-C(166)-H(166) | 117.0      | N(2B)-Th(1B)-N(3B)   | 108.8      |
| N(15)-C(167)-C(168)  | 125.42(18) | N(4B)-Th(1B)-S(3B)   | 121.5      |
| N(15)-C(167)-H(167)  | 117.3      | N(1B)-Th(1B)-S(3B)   | 79.3       |
| C(168)-C(167)-H(167) | 117.3      | N(2B)-Th(1B)-S(3B)   | 75.0       |
| C(167)-C(168)-C(169) | 115.24(18) | N(3B)-Th(1B)-S(3B)   | 72.2       |
| C(167)-C(168)-H(168) | 122.4      | N(4B)-Th(1B)-S(4B)   | 80.4       |
| C(169)-C(168)-H(168) | 122.4      | N(1B)-Th(1B)-S(4B)   | 120.9      |
| C(170)-C(169)-C(168) | 122.53(19) | N(2B)-Th(1B)-S(4B)   | 70.8       |
| C(170)-C(169)-H(169) | 118.7      | N(3B)-Th(1B)-S(4B)   | 74.4       |
| C(168)-C(169)-H(169) | 118.7      | S(3B)-Th(1B)-S(4B)   | 120.1      |
| C(169)-C(170)-C(171) | 118.34(18) | N(4B)-Th(1B)-S(1B)   | 86.9       |
| C(169)-C(170)-H(170) | 120.8      | N(1B)-Th(1B)-S(1B)   | 64.3       |
| C(171)-C(170)-H(170) | 120.8      | N(2B)-Th(1B)-S(1B)   | 90.6       |

|                      |       |                      |       |
|----------------------|-------|----------------------|-------|
| N(3B)-Th(1B)-S(1B)   | 144.2 | C(205)-C(204)-H(204) | 119.4 |
| S(3B)-Th(1B)-S(1B)   | 143.3 | C(203)-C(204)-H(204) | 119.4 |
| S(4B)-Th(1B)-S(1B)   | 84.6  | C(204)-C(205)-C(206) | 120.9 |
| N(4B)-Th(1B)-S(2B)   | 64.1  | C(204)-C(205)-H(205) | 119.6 |
| N(1B)-Th(1B)-S(2B)   | 87.1  | C(206)-C(205)-H(205) | 119.6 |
| N(2B)-Th(1B)-S(2B)   | 144.7 | C(201)-C(206)-C(205) | 120.0 |
| N(3B)-Th(1B)-S(2B)   | 91.2  | C(201)-C(206)-H(206) | 120.0 |
| S(3B)-Th(1B)-S(2B)   | 84.4  | C(205)-C(206)-H(206) | 120.0 |
| S(4B)-Th(1B)-S(2B)   | 144.2 | C(212)-C(207)-C(208) | 119.0 |
| S(1B)-Th(1B)-S(2B)   | 89.2  | C(212)-C(207)-S(2B)  | 123.5 |
| C(201)-S(1B)-Th(1B)  | 120.9 | C(208)-C(207)-S(2B)  | 117.3 |
| C(207)-S(2B)-Th(1B)  | 122.8 | C(209)-C(208)-C(207) | 118.5 |
| C(213)-S(3B)-Th(1B)  | 115.3 | C(209)-C(208)-H(208) | 120.8 |
| C(219)-S(4B)-Th(1B)  | 113.2 | C(207)-C(208)-H(208) | 120.8 |
| C(229)-N(1B)-C(225)  | 117.7 | C(210)-C(209)-C(208) | 121.7 |
| C(229)-N(1B)-Th(1B)  | 122.5 | C(210)-C(209)-H(209) | 119.1 |
| C(225)-N(1B)-Th(1B)  | 119.4 | C(208)-C(209)-H(209) | 119.1 |
| C(234)-N(2B)-C(230)  | 117.7 | C(209)-C(210)-C(211) | 120.0 |
| C(234)-N(2B)-Th(1B)  | 119.1 | C(209)-C(210)-H(210) | 120.0 |
| C(230)-N(2B)-Th(1B)  | 122.8 | C(211)-C(210)-H(210) | 120.0 |
| C(235)-N(3B)-C(239)  | 120.3 | C(212)-C(211)-C(210) | 118.5 |
| C(235)-N(3B)-Th(1B)  | 119.3 | C(212)-C(211)-H(211) | 120.7 |
| C(239)-N(3B)-Th(1B)  | 120.0 | C(210)-C(211)-H(211) | 120.7 |
| C(244)-N(4B)-C(240)  | 117.8 | C(211)-C(212)-C(207) | 122.2 |
| C(244)-N(4B)-Th(1B)  | 119.4 | C(211)-C(212)-H(212) | 118.9 |
| C(240)-N(4B)-Th(1B)  | 122.3 | C(207)-C(212)-H(212) | 118.9 |
| C(202)-C(201)-C(206) | 117.8 | C(214)-C(213)-C(218) | 117.6 |
| C(202)-C(201)-S(1B)  | 118.7 | C(214)-C(213)-S(3B)  | 122.6 |
| C(206)-C(201)-S(1B)  | 123.0 | C(218)-C(213)-S(3B)  | 119.8 |
| C(203)-C(202)-C(201) | 122.1 | C(213)-C(214)-C(215) | 121.2 |
| C(203)-C(202)-H(202) | 119.0 | C(213)-C(214)-H(214) | 119.4 |
| C(201)-C(202)-H(202) | 119.0 | C(215)-C(214)-H(214) | 119.4 |
| C(202)-C(203)-C(204) | 117.5 | C(216)-C(215)-C(214) | 120.6 |
| C(202)-C(203)-H(203) | 121.3 | C(216)-C(215)-H(215) | 119.7 |
| C(204)-C(203)-H(203) | 121.3 | C(214)-C(215)-H(215) | 119.7 |
| C(205)-C(204)-C(203) | 121.3 | C(215)-C(216)-C(217) | 119.5 |

|                      |       |                      |       |
|----------------------|-------|----------------------|-------|
| C(215)-C(216)-H(216) | 120.2 | C(229)-C(228)-H(228) | 122.1 |
| C(217)-C(216)-H(216) | 120.2 | C(227)-C(228)-H(228) | 122.1 |
| C(216)-C(217)-C(218) | 120.9 | N(1B)-C(229)-C(228)  | 123.1 |
| C(216)-C(217)-H(217) | 119.5 | N(1B)-C(229)-C(230)  | 118.3 |
| C(218)-C(217)-H(217) | 119.5 | C(228)-C(229)-C(230) | 118.4 |
| C(217)-C(218)-C(213) | 120.0 | N(2B)-C(230)-C(231)  | 121.9 |
| C(217)-C(218)-H(218) | 120.0 | N(2B)-C(230)-C(229)  | 114.3 |
| C(213)-C(218)-H(218) | 120.0 | C(231)-C(230)-C(229) | 123.5 |
| C(220)-C(219)-C(224) | 118.8 | C(230)-C(231)-C(232) | 118.8 |
| C(220)-C(219)-S(4B)  | 119.0 | C(230)-C(231)-H(231) | 120.6 |
| C(224)-C(219)-S(4B)  | 122.0 | C(232)-C(231)-H(231) | 120.6 |
| C(219)-C(220)-C(221) | 119.5 | C(233)-C(232)-C(231) | 120.4 |
| C(219)-C(220)-H(220) | 120.3 | C(233)-C(232)-H(232) | 119.8 |
| C(221)-C(220)-H(220) | 120.3 | C(231)-C(232)-H(232) | 119.8 |
| C(222)-C(221)-C(220) | 120.5 | C(232)-C(233)-C(234) | 118.3 |
| C(222)-C(221)-H(221) | 119.8 | C(232)-C(233)-H(233) | 120.9 |
| C(220)-C(221)-H(221) | 119.8 | C(234)-C(233)-H(233) | 120.9 |
| C(221)-C(222)-C(223) | 121.3 | N(2B)-C(234)-C(233)  | 122.6 |
| C(221)-C(222)-H(222) | 119.4 | N(2B)-C(234)-H(234)  | 118.7 |
| C(223)-C(222)-H(222) | 119.4 | C(233)-C(234)-H(234) | 118.7 |
| C(224)-C(223)-C(222) | 118.2 | N(3B)-C(235)-C(236)  | 122.0 |
| C(224)-C(223)-H(223) | 120.9 | N(3B)-C(235)-H(235)  | 119.0 |
| C(222)-C(223)-H(223) | 120.9 | C(236)-C(235)-H(235) | 119.0 |
| C(223)-C(224)-C(219) | 121.3 | C(237)-C(236)-C(235) | 119.1 |
| C(223)-C(224)-H(224) | 119.4 | C(237)-C(236)-H(236) | 120.5 |
| C(219)-C(224)-H(224) | 119.4 | C(235)-C(236)-H(236) | 120.5 |
| C(226)-C(225)-N(1B)  | 123.0 | C(236)-C(237)-C(238) | 119.6 |
| C(226)-C(225)-H(225) | 118.5 | C(236)-C(237)-H(237) | 120.2 |
| N(1B)-C(225)-H(225)  | 118.5 | C(238)-C(237)-H(237) | 120.2 |
| C(225)-C(226)-C(227) | 121.2 | C(237)-C(238)-C(239) | 120.2 |
| C(225)-C(226)-H(226) | 119.4 | C(237)-C(238)-H(238) | 119.9 |
| C(227)-C(226)-H(226) | 119.4 | C(239)-C(238)-H(238) | 119.9 |
| C(226)-C(227)-C(228) | 118.9 | N(3B)-C(239)-C(238)  | 118.6 |
| C(226)-C(227)-H(227) | 120.6 | N(3B)-C(239)-C(240)  | 117.7 |
| C(228)-C(227)-H(227) | 120.6 | C(238)-C(239)-C(240) | 123.7 |
| C(229)-C(228)-C(227) | 115.7 | N(4B)-C(240)-C(241)  | 122.2 |

|                      |       |                      |       |
|----------------------|-------|----------------------|-------|
| N(4B)-C(240)-C(239)  | 118.0 | N(8B)-Th(2B)-S(6B)   | 63.7  |
| C(241)-C(240)-C(239) | 119.9 | N(7B)-Th(2B)-S(6B)   | 91.0  |
| C(242)-C(241)-C(240) | 117.3 | N(6B)-Th(2B)-S(6B)   | 143.9 |
| C(242)-C(241)-H(241) | 121.3 | S(7B)-Th(2B)-S(6B)   | 84.4  |
| C(240)-C(241)-H(241) | 121.3 | S(8B)-Th(2B)-S(6B)   | 143.9 |
| C(241)-C(242)-C(243) | 120.7 | S(5B)-Th(2B)-S(6B)   | 89.4  |
| C(241)-C(242)-H(242) | 119.7 | C(245)-S(5B)-Th(2B)  | 120.6 |
| C(243)-C(242)-H(242) | 119.7 | C(251)-S(6B)-Th(2B)  | 120.9 |
| C(244)-C(243)-C(242) | 116.4 | C(257)-S(7B)-Th(2B)  | 115.6 |
| C(244)-C(243)-H(243) | 121.8 | C(263)-S(8B)-Th(2B)  | 111.4 |
| C(242)-C(243)-H(243) | 121.8 | C(273)-N(5B)-C(269)  | 117.2 |
| N(4B)-C(244)-C(243)  | 125.4 | C(273)-N(5B)-Th(2B)  | 122.7 |
| N(4B)-C(244)-H(244)  | 117.3 | C(269)-N(5B)-Th(2B)  | 119.5 |
| C(243)-C(244)-H(244) | 117.3 | C(274)-N(6B)-C(278)  | 118.1 |
| N(5B)-Th(2B)-N(8B)   | 139.9 | C(274)-N(6B)-Th(2B)  | 121.8 |
| N(5B)-Th(2B)-N(7B)   | 151.7 | C(278)-N(6B)-Th(2B)  | 119.6 |
| N(8B)-Th(2B)-N(7B)   | 61.3  | C(279)-N(7B)-C(283)  | 117.7 |
| N(5B)-Th(2B)-N(6B)   | 60.9  | C(279)-N(7B)-Th(2B)  | 119.1 |
| N(8B)-Th(2B)-N(6B)   | 152.5 | C(283)-N(7B)-Th(2B)  | 123.0 |
| N(7B)-Th(2B)-N(6B)   | 108.4 | C(288)-N(8B)-C(284)  | 118.1 |
| N(5B)-Th(2B)-S(7B)   | 78.9  | C(288)-N(8B)-Th(2B)  | 119.3 |
| N(8B)-Th(2B)-S(7B)   | 121.8 | C(284)-N(8B)-Th(2B)  | 121.9 |
| N(7B)-Th(2B)-S(7B)   | 72.9  | C(250)-C(245)-C(246) | 117.1 |
| N(6B)-Th(2B)-S(7B)   | 73.2  | C(250)-C(245)-S(5B)  | 123.2 |
| N(5B)-Th(2B)-S(8B)   | 121.1 | C(246)-C(245)-S(5B)  | 119.1 |
| N(8B)-Th(2B)-S(8B)   | 80.5  | C(247)-C(246)-C(245) | 119.4 |
| N(7B)-Th(2B)-S(8B)   | 73.8  | C(247)-C(246)-H(246) | 120.3 |
| N(6B)-Th(2B)-S(8B)   | 72.0  | C(245)-C(246)-H(246) | 120.3 |
| S(7B)-Th(2B)-S(8B)   | 120.0 | C(248)-C(247)-C(246) | 121.6 |
| N(5B)-Th(2B)-S(5B)   | 65.3  | C(248)-C(247)-H(247) | 119.2 |
| N(8B)-Th(2B)-S(5B)   | 86.1  | C(246)-C(247)-H(247) | 119.2 |
| N(7B)-Th(2B)-S(5B)   | 143.0 | C(249)-C(248)-C(247) | 119.3 |
| N(6B)-Th(2B)-S(5B)   | 92.3  | C(249)-C(248)-H(248) | 120.4 |
| S(7B)-Th(2B)-S(5B)   | 143.9 | C(247)-C(248)-H(248) | 120.4 |
| S(8B)-Th(2B)-S(5B)   | 84.4  | C(248)-C(249)-C(250) | 122.0 |
| N(5B)-Th(2B)-S(6B)   | 87.5  | C(248)-C(249)-H(249) | 119.0 |

|                      |       |                      |       |
|----------------------|-------|----------------------|-------|
| C(250)-C(249)-H(249) | 119.0 | C(262)-C(261)-H(261) | 120.5 |
| C(249)-C(250)-C(245) | 120.4 | C(261)-C(262)-C(257) | 121.7 |
| C(249)-C(250)-H(250) | 119.8 | C(261)-C(262)-H(262) | 119.1 |
| C(245)-C(250)-H(250) | 119.8 | C(257)-C(262)-H(262) | 119.1 |
| C(256)-C(251)-C(252) | 119.7 | C(268)-C(263)-C(264) | 118.7 |
| C(256)-C(251)-S(6B)  | 122.3 | C(268)-C(263)-S(8B)  | 122.6 |
| C(252)-C(251)-S(6B)  | 117.8 | C(264)-C(263)-S(8B)  | 118.6 |
| C(253)-C(252)-C(251) | 120.0 | C(263)-C(264)-C(265) | 120.6 |
| C(253)-C(252)-H(252) | 120.0 | C(263)-C(264)-H(264) | 119.7 |
| C(251)-C(252)-H(252) | 120.0 | C(265)-C(264)-H(264) | 119.7 |
| C(254)-C(253)-C(252) | 120.5 | C(266)-C(265)-C(264) | 119.6 |
| C(254)-C(253)-H(253) | 119.7 | C(266)-C(265)-H(265) | 120.2 |
| C(252)-C(253)-H(253) | 119.7 | C(264)-C(265)-H(265) | 120.2 |
| C(253)-C(254)-C(255) | 121.0 | C(265)-C(266)-C(267) | 118.4 |
| C(253)-C(254)-H(254) | 119.5 | C(265)-C(266)-H(266) | 120.8 |
| C(255)-C(254)-H(254) | 119.5 | C(267)-C(266)-H(266) | 120.8 |
| C(254)-C(255)-C(256) | 118.8 | C(268)-C(267)-C(266) | 122.5 |
| C(254)-C(255)-H(255) | 120.6 | C(268)-C(267)-H(267) | 118.8 |
| C(256)-C(255)-H(255) | 120.6 | C(266)-C(267)-H(267) | 118.8 |
| C(251)-C(256)-C(255) | 119.8 | C(267)-C(268)-C(263) | 119.9 |
| C(251)-C(256)-H(256) | 120.1 | C(267)-C(268)-H(268) | 120.0 |
| C(255)-C(256)-H(256) | 120.1 | C(263)-C(268)-H(268) | 120.0 |
| C(262)-C(257)-C(258) | 118.1 | C(270)-C(269)-N(5B)  | 123.9 |
| C(262)-C(257)-S(7B)  | 122.2 | C(270)-C(269)-H(269) | 118.0 |
| C(258)-C(257)-S(7B)  | 119.4 | N(5B)-C(269)-H(269)  | 118.0 |
| C(259)-C(258)-C(257) | 119.1 | C(269)-C(270)-C(271) | 118.9 |
| C(259)-C(258)-H(258) | 120.5 | C(269)-C(270)-H(270) | 120.5 |
| C(257)-C(258)-H(258) | 120.5 | C(271)-C(270)-H(270) | 120.5 |
| C(260)-C(259)-C(258) | 121.0 | C(272)-C(271)-C(270) | 118.8 |
| C(260)-C(259)-H(259) | 119.5 | C(272)-C(271)-H(271) | 120.6 |
| C(258)-C(259)-H(259) | 119.5 | C(270)-C(271)-H(271) | 120.6 |
| C(259)-C(260)-C(261) | 121.0 | C(271)-C(272)-C(273) | 121.0 |
| C(259)-C(260)-H(260) | 119.5 | C(271)-C(272)-H(272) | 119.5 |
| C(261)-C(260)-H(260) | 119.5 | C(273)-C(272)-H(272) | 119.5 |
| C(260)-C(261)-C(262) | 119.0 | N(5B)-C(273)-C(272)  | 120.0 |
| C(260)-C(261)-H(261) | 120.5 | N(5B)-C(273)-C(274)  | 115.8 |



|                      |       |                      |       |
|----------------------|-------|----------------------|-------|
| C(272)-C(273)-C(274) | 124.1 | C(284)-C(285)-H(285) | 120.6 |
| N(6B)-C(274)-C(275)  | 121.4 | C(285)-C(286)-C(287) | 120.3 |
| N(6B)-C(274)-C(273)  | 118.0 | C(285)-C(286)-H(286) | 119.8 |
| C(275)-C(274)-C(273) | 120.6 | C(287)-C(286)-H(286) | 119.8 |
| C(274)-C(275)-C(276) | 120.4 | C(288)-C(287)-C(286) | 115.9 |
| C(274)-C(275)-H(275) | 119.8 | C(288)-C(287)-H(287) | 122.1 |
| C(276)-C(275)-H(275) | 119.8 | C(286)-C(287)-H(287) | 122.1 |
| C(275)-C(276)-C(277) | 119.3 | N(8B)-C(288)-C(287)  | 124.7 |
| C(275)-C(276)-H(276) | 120.3 | N(8B)-C(288)-H(288)  | 117.6 |
| C(277)-C(276)-H(276) | 120.3 | C(287)-C(288)-H(288) | 117.6 |
| C(278)-C(277)-C(276) | 116.4 | N(10B)-Th(3B)-N(12B) | 150.6 |
| C(278)-C(277)-H(277) | 121.8 | N(10B)-Th(3B)-N(9B)  | 61.3  |
| C(276)-C(277)-H(277) | 121.8 | N(12B)-Th(3B)-N(9B)  | 141.6 |
| C(277)-C(278)-N(6B)  | 124.1 | N(10B)-Th(3B)-N(11B) | 106.3 |
| C(277)-C(278)-H(278) | 118.0 | N(12B)-Th(3B)-N(11B) | 61.0  |
| N(6B)-C(278)-H(278)  | 118.0 | N(9B)-Th(3B)-N(11B)  | 152.1 |
| N(7B)-C(279)-C(280)  | 123.5 | N(10B)-Th(3B)-S(12B) | 72.1  |
| N(7B)-C(279)-H(279)  | 118.3 | N(12B)-Th(3B)-S(12B) | 78.6  |
| C(280)-C(279)-H(279) | 118.3 | N(9B)-Th(3B)-S(12B)  | 120.8 |
| C(279)-C(280)-C(281) | 119.3 | N(11B)-Th(3B)-S(12B) | 72.5  |
| C(279)-C(280)-H(280) | 120.4 | N(10B)-Th(3B)-S(11B) | 73.1  |
| C(281)-C(280)-H(280) | 120.4 | N(12B)-Th(3B)-S(11B) | 121.4 |
| C(282)-C(281)-C(280) | 116.4 | N(9B)-Th(3B)-S(11B)  | 79.6  |
| C(282)-C(281)-H(281) | 121.8 | N(11B)-Th(3B)-S(11B) | 72.7  |
| C(280)-C(281)-H(281) | 121.8 | S(12B)-Th(3B)-S(11B) | 120.1 |
| C(283)-C(282)-C(281) | 122.9 | N(10B)-Th(3B)-S(10B) | 145.1 |
| C(283)-C(282)-H(282) | 118.5 | N(12B)-Th(3B)-S(10B) | 64.3  |
| C(281)-C(282)-H(282) | 118.5 | N(9B)-Th(3B)-S(10B)  | 88.8  |
| C(282)-C(283)-N(7B)  | 120.0 | N(11B)-Th(3B)-S(10B) | 91.9  |
| C(282)-C(283)-C(284) | 124.6 | S(12B)-Th(3B)-S(10B) | 142.7 |
| N(7B)-C(283)-C(284)  | 115.4 | S(11B)-Th(3B)-S(10B) | 84.9  |
| N(8B)-C(284)-C(285)  | 121.9 | N(10B)-Th(3B)-S(9B)  | 92.3  |
| N(8B)-C(284)-C(283)  | 117.3 | N(12B)-Th(3B)-S(9B)  | 87.8  |
| C(285)-C(284)-C(283) | 120.8 | N(9B)-Th(3B)-S(9B)   | 63.8  |
| C(286)-C(285)-C(284) | 118.9 | N(11B)-Th(3B)-S(9B)  | 144.1 |
| C(286)-C(285)-H(285) | 120.6 | S(12B)-Th(3B)-S(9B)  | 85.0  |

|                      |       |                      |       |
|----------------------|-------|----------------------|-------|
| S(11B)-Th(3B)-S(9B)  | 143.1 | C(296)-C(295)-C(300) | 118.4 |
| S(10B)-Th(3B)-S(9B)  | 89.5  | C(296)-C(295)-S(10B) | 120.8 |
| C(289)-S(9B)-Th(3B)  | 121.8 | C(300)-C(295)-S(10B) | 120.7 |
| C(295)-S(10B)-Th(3B) | 121.0 | C(295)-C(296)-C(297) | 124.1 |
| C(301)-S(11B)-Th(3B) | 114.8 | C(295)-C(296)-H(296) | 118.0 |
| C(307)-S(12B)-Th(3B) | 113.0 | C(297)-C(296)-H(296) | 118.0 |
| C(313)-N(9B)-C(317)  | 117.7 | C(298)-C(297)-C(296) | 119.0 |
| C(313)-N(9B)-Th(3B)  | 118.0 | C(298)-C(297)-H(297) | 120.5 |
| C(317)-N(9B)-Th(3B)  | 123.6 | C(296)-C(297)-H(297) | 120.5 |
| C(322)-N(10B)-C(318) | 115.8 | C(299)-C(298)-C(297) | 119.6 |
| C(322)-N(10B)-Th(3B) | 122.0 | C(299)-C(298)-H(298) | 120.2 |
| C(318)-N(10B)-Th(3B) | 122.2 | C(297)-C(298)-H(298) | 120.2 |
| C(323)-N(11B)-C(327) | 115.6 | C(298)-C(299)-C(300) | 122.9 |
| C(323)-N(11B)-Th(3B) | 121.6 | C(298)-C(299)-H(299) | 118.5 |
| C(327)-N(11B)-Th(3B) | 122.8 | C(300)-C(299)-H(299) | 118.5 |
| C(332)-N(12B)-C(328) | 116.8 | C(299)-C(300)-C(295) | 115.9 |
| C(332)-N(12B)-Th(3B) | 119.1 | C(299)-C(300)-H(300) | 122.1 |
| C(328)-N(12B)-Th(3B) | 123.5 | C(295)-C(300)-H(300) | 122.1 |
| C(294)-C(289)-C(290) | 117.5 | C(302)-C(301)-C(306) | 118.7 |
| C(294)-C(289)-S(9B)  | 123.1 | C(302)-C(301)-S(11B) | 119.9 |
| C(290)-C(289)-S(9B)  | 119.1 | C(306)-C(301)-S(11B) | 121.4 |
| C(291)-C(290)-C(289) | 122.3 | C(301)-C(302)-C(303) | 122.2 |
| C(291)-C(290)-H(290) | 118.9 | C(301)-C(302)-H(302) | 118.9 |
| C(289)-C(290)-H(290) | 118.9 | C(303)-C(302)-H(302) | 118.9 |
| C(290)-C(291)-C(292) | 119.3 | C(304)-C(303)-C(302) | 120.3 |
| C(290)-C(291)-H(291) | 120.4 | C(304)-C(303)-H(303) | 119.9 |
| C(292)-C(291)-H(291) | 120.4 | C(302)-C(303)-H(303) | 119.9 |
| C(291)-C(292)-C(293) | 120.3 | C(303)-C(304)-C(305) | 118.2 |
| C(291)-C(292)-H(292) | 119.8 | C(303)-C(304)-H(304) | 120.9 |
| C(293)-C(292)-H(292) | 119.8 | C(305)-C(304)-H(304) | 120.9 |
| C(294)-C(293)-C(292) | 119.6 | C(306)-C(305)-C(304) | 120.9 |
| C(294)-C(293)-H(293) | 120.2 | C(306)-C(305)-H(305) | 119.5 |
| C(292)-C(293)-H(293) | 120.2 | C(304)-C(305)-H(305) | 119.5 |
| C(293)-C(294)-C(289) | 120.7 | C(305)-C(306)-C(301) | 119.5 |
| C(293)-C(294)-H(294) | 119.7 | C(305)-C(306)-H(306) | 120.2 |
| C(289)-C(294)-H(294) | 119.7 | C(301)-C(306)-H(306) | 120.2 |

|                      |       |                      |       |
|----------------------|-------|----------------------|-------|
| C(312)-C(307)-C(308) | 117.5 | C(318)-C(319)-C(320) | 120.1 |
| C(312)-C(307)-S(12B) | 120.5 | C(318)-C(319)-H(319) | 120.0 |
| C(308)-C(307)-S(12B) | 122.0 | C(320)-C(319)-H(319) | 120.0 |
| C(309)-C(308)-C(307) | 119.7 | C(321)-C(320)-C(319) | 117.2 |
| C(309)-C(308)-H(308) | 120.2 | C(321)-C(320)-H(320) | 121.4 |
| C(307)-C(308)-H(308) | 120.2 | C(319)-C(320)-H(320) | 121.4 |
| C(310)-C(309)-C(308) | 122.1 | C(320)-C(321)-C(322) | 119.1 |
| C(310)-C(309)-H(309) | 118.9 | C(320)-C(321)-H(321) | 120.4 |
| C(308)-C(309)-H(309) | 118.9 | C(322)-C(321)-H(321) | 120.4 |
| C(309)-C(310)-C(311) | 118.9 | N(10B)-C(322)-C(321) | 126.0 |
| C(309)-C(310)-H(310) | 120.6 | N(10B)-C(322)-H(322) | 117.0 |
| C(311)-C(310)-H(310) | 120.6 | C(321)-C(322)-H(322) | 117.0 |
| C(310)-C(311)-C(312) | 120.1 | N(11B)-C(323)-C(324) | 126.5 |
| C(310)-C(311)-H(311) | 119.9 | N(11B)-C(323)-H(323) | 116.8 |
| C(312)-C(311)-H(311) | 119.9 | C(324)-C(323)-H(323) | 116.8 |
| C(307)-C(312)-C(311) | 121.5 | C(323)-C(324)-C(325) | 116.6 |
| C(307)-C(312)-H(312) | 119.3 | C(323)-C(324)-H(324) | 121.7 |
| C(311)-C(312)-H(312) | 119.3 | C(325)-C(324)-H(324) | 121.7 |
| N(9B)-C(313)-C(314)  | 122.2 | C(326)-C(325)-C(324) | 120.7 |
| N(9B)-C(313)-H(313)  | 118.9 | C(326)-C(325)-H(325) | 119.6 |
| C(314)-C(313)-H(313) | 118.9 | C(324)-C(325)-H(325) | 119.6 |
| C(315)-C(314)-C(313) | 119.7 | C(325)-C(326)-C(327) | 117.9 |
| C(315)-C(314)-H(314) | 120.1 | C(325)-C(326)-H(326) | 121.0 |
| C(313)-C(314)-H(314) | 120.1 | C(327)-C(326)-H(326) | 121.0 |
| C(314)-C(315)-C(316) | 117.3 | N(11B)-C(327)-C(326) | 122.6 |
| C(314)-C(315)-H(315) | 121.4 | N(11B)-C(327)-C(328) | 117.6 |
| C(316)-C(315)-H(315) | 121.4 | C(326)-C(327)-C(328) | 119.6 |
| C(317)-C(316)-C(315) | 120.8 | C(329)-C(328)-N(12B) | 120.3 |
| C(317)-C(316)-H(316) | 119.6 | C(329)-C(328)-C(327) | 125.4 |
| C(315)-C(316)-H(316) | 119.6 | N(12B)-C(328)-C(327) | 114.2 |
| C(316)-C(317)-N(9B)  | 122.2 | C(330)-C(329)-C(328) | 123.5 |
| C(316)-C(317)-C(318) | 123.3 | C(330)-C(329)-H(329) | 118.3 |
| N(9B)-C(317)-C(318)  | 114.2 | C(328)-C(329)-H(329) | 118.3 |
| N(10B)-C(318)-C(319) | 121.7 | C(329)-C(330)-C(331) | 115.5 |
| N(10B)-C(318)-C(317) | 117.5 | C(329)-C(330)-H(330) | 122.2 |
| C(319)-C(318)-C(317) | 120.8 | C(331)-C(330)-H(330) | 122.2 |

|                      |       |                      |       |
|----------------------|-------|----------------------|-------|
| C(332)-C(331)-C(330) | 119.8 | C(345)-S(15B)-Th(4B) | 112.3 |
| C(332)-C(331)-H(331) | 120.1 | C(351)-S(16B)-Th(4B) | 113.0 |
| C(330)-C(331)-H(331) | 120.1 | C(357)-N(13B)-C(361) | 117.1 |
| N(12B)-C(332)-C(331) | 123.7 | C(357)-N(13B)-Th(4B) | 120.2 |
| N(12B)-C(332)-H(332) | 118.2 | C(361)-N(13B)-Th(4B) | 122.5 |
| C(331)-C(332)-H(332) | 118.2 | C(366)-N(14B)-C(362) | 117.3 |
| N(13B)-Th(4B)-N(16B) | 139.4 | C(366)-N(14B)-Th(4B) | 120.5 |
| N(13B)-Th(4B)-N(15B) | 152.3 | C(362)-N(14B)-Th(4B) | 121.9 |
| N(16B)-Th(4B)-N(15B) | 61.7  | C(367)-N(15B)-C(371) | 117.7 |
| N(13B)-Th(4B)-N(14B) | 61.7  | C(367)-N(15B)-Th(4B) | 120.9 |
| N(16B)-Th(4B)-N(14B) | 151.6 | C(371)-N(15B)-Th(4B) | 121.3 |
| N(15B)-Th(4B)-N(14B) | 108.0 | C(372)-N(16B)-C(376) | 116.4 |
| N(13B)-Th(4B)-S(15B) | 79.6  | C(372)-N(16B)-Th(4B) | 122.5 |
| N(16B)-Th(4B)-S(15B) | 122.5 | C(376)-N(16B)-Th(4B) | 120.9 |
| N(15B)-Th(4B)-S(15B) | 72.7  | C(338)-C(333)-C(334) | 118.5 |
| N(14B)-Th(4B)-S(15B) | 73.0  | C(338)-C(333)-S(13B) | 124.8 |
| N(13B)-Th(4B)-S(16B) | 121.6 | C(334)-C(333)-S(13B) | 116.6 |
| N(16B)-Th(4B)-S(16B) | 79.0  | C(335)-C(334)-C(333) | 120.0 |
| N(15B)-Th(4B)-S(16B) | 73.6  | C(335)-C(334)-H(334) | 120.0 |
| N(14B)-Th(4B)-S(16B) | 72.7  | C(333)-C(334)-H(334) | 120.0 |
| S(15B)-Th(4B)-S(16B) | 120.4 | C(334)-C(335)-C(336) | 119.9 |
| N(13B)-Th(4B)-S(13B) | 63.0  | C(334)-C(335)-H(335) | 120.1 |
| N(16B)-Th(4B)-S(13B) | 87.5  | C(336)-C(335)-H(335) | 120.1 |
| N(15B)-Th(4B)-S(13B) | 144.7 | C(337)-C(336)-C(335) | 118.1 |
| N(14B)-Th(4B)-S(13B) | 90.8  | C(337)-C(336)-H(336) | 120.9 |
| S(15B)-Th(4B)-S(13B) | 142.5 | C(335)-C(336)-H(336) | 120.9 |
| S(16B)-Th(4B)-S(13B) | 84.5  | C(336)-C(337)-C(338) | 122.0 |
| N(13B)-Th(4B)-S(14B) | 87.2  | C(336)-C(337)-H(337) | 119.0 |
| N(16B)-Th(4B)-S(14B) | 64.7  | C(338)-C(337)-H(337) | 119.0 |
| N(15B)-Th(4B)-S(14B) | 90.8  | C(333)-C(338)-C(337) | 121.4 |
| N(14B)-Th(4B)-S(14B) | 143.6 | C(333)-C(338)-H(338) | 119.3 |
| S(15B)-Th(4B)-S(14B) | 83.9  | C(337)-C(338)-H(338) | 119.3 |
| S(16B)-Th(4B)-S(14B) | 143.6 | C(344)-C(339)-C(340) | 114.6 |
| S(13B)-Th(4B)-S(14B) | 90.9  | C(344)-C(339)-S(14B) | 125.5 |
| C(333)-S(13B)-Th(4B) | 122.7 | C(340)-C(339)-S(14B) | 119.4 |
| C(339)-S(14B)-Th(4B) | 119.8 | C(341)-C(340)-C(339) | 123.1 |

|                      |       |                      |       |
|----------------------|-------|----------------------|-------|
| C(341)-C(340)-H(340) | 118.5 | C(353)-C(352)-H(352) | 120.5 |
| C(339)-C(340)-H(340) | 118.5 | C(351)-C(352)-H(352) | 120.5 |
| C(340)-C(341)-C(342) | 120.8 | C(354)-C(353)-C(352) | 120.7 |
| C(340)-C(341)-H(341) | 119.6 | C(354)-C(353)-H(353) | 119.6 |
| C(342)-C(341)-H(341) | 119.6 | C(352)-C(353)-H(353) | 119.7 |
| C(341)-C(342)-C(343) | 116.9 | C(355)-C(354)-C(353) | 120.2 |
| C(341)-C(342)-H(342) | 121.6 | C(355)-C(354)-H(354) | 119.9 |
| C(343)-C(342)-H(342) | 121.6 | C(353)-C(354)-H(354) | 119.9 |
| C(344)-C(343)-C(342) | 119.2 | C(354)-C(355)-C(356) | 120.3 |
| C(344)-C(343)-H(343) | 120.4 | C(354)-C(355)-H(355) | 119.9 |
| C(342)-C(343)-H(343) | 120.4 | C(356)-C(355)-H(355) | 119.9 |
| C(343)-C(344)-C(339) | 125.3 | C(351)-C(356)-C(355) | 119.3 |
| C(343)-C(344)-H(344) | 117.3 | C(351)-C(356)-H(356) | 120.3 |
| C(339)-C(344)-H(344) | 117.3 | C(355)-C(356)-H(356) | 120.3 |
| C(346)-C(345)-C(350) | 118.7 | N(13B)-C(357)-C(358) | 123.3 |
| C(346)-C(345)-S(15B) | 120.4 | N(13B)-C(357)-H(357) | 118.4 |
| C(350)-C(345)-S(15B) | 120.8 | C(358)-C(357)-H(357) | 118.4 |
| C(347)-C(346)-C(345) | 121.9 | C(359)-C(358)-C(357) | 117.6 |
| C(347)-C(346)-H(346) | 119.1 | C(359)-C(358)-H(358) | 121.2 |
| C(345)-C(346)-H(346) | 119.1 | C(357)-C(358)-H(358) | 121.2 |
| C(348)-C(347)-C(346) | 117.1 | C(360)-C(359)-C(358) | 120.9 |
| C(348)-C(347)-H(347) | 121.4 | C(360)-C(359)-H(359) | 119.6 |
| C(346)-C(347)-H(347) | 121.4 | C(358)-C(359)-H(359) | 119.6 |
| C(349)-C(348)-C(347) | 121.9 | C(359)-C(360)-C(361) | 119.2 |
| C(349)-C(348)-H(348) | 119.1 | C(359)-C(360)-H(360) | 120.4 |
| C(347)-C(348)-H(348) | 119.1 | C(361)-C(360)-H(360) | 120.4 |
| C(348)-C(349)-C(350) | 122.8 | N(13B)-C(361)-C(360) | 121.7 |
| C(348)-C(349)-H(349) | 118.6 | N(13B)-C(361)-C(362) | 115.8 |
| C(350)-C(349)-H(349) | 118.6 | C(360)-C(361)-C(362) | 122.1 |
| C(345)-C(350)-C(349) | 117.4 | N(14B)-C(362)-C(363) | 120.1 |
| C(345)-C(350)-H(350) | 121.3 | N(14B)-C(362)-C(361) | 117.1 |
| C(349)-C(350)-H(350) | 121.3 | C(363)-C(362)-C(361) | 122.9 |
| C(356)-C(351)-C(352) | 120.2 | C(364)-C(363)-C(362) | 120.6 |
| C(356)-C(351)-S(16B) | 121.1 | C(364)-C(363)-H(363) | 119.7 |
| C(352)-C(351)-S(16B) | 118.6 | C(362)-C(363)-H(363) | 119.7 |
| C(353)-C(352)-C(351) | 119.1 | C(365)-C(364)-C(363) | 117.6 |

|                      |       |                      |       |
|----------------------|-------|----------------------|-------|
| C(365)-C(364)-H(364) | 121.2 | C(371)-C(370)-H(370) | 120.8 |
| C(363)-C(364)-H(364) | 121.2 | N(15B)-C(371)-C(370) | 120.6 |
| C(366)-C(365)-C(364) | 118.1 | N(15B)-C(371)-C(372) | 116.7 |
| C(366)-C(365)-H(365) | 121.0 | C(370)-C(371)-C(372) | 122.1 |
| C(364)-C(365)-H(365) | 121.0 | N(16B)-C(372)-C(373) | 121.2 |
| N(14B)-C(366)-C(365) | 126.0 | N(16B)-C(372)-C(371) | 117.1 |
| N(14B)-C(366)-H(366) | 117.0 | C(373)-C(372)-C(371) | 121.6 |
| C(365)-C(366)-H(366) | 117.0 | C(374)-C(373)-C(372) | 118.7 |
| N(15B)-C(367)-C(368) | 125.4 | C(374)-C(373)-H(373) | 120.6 |
| N(15B)-C(367)-H(367) | 117.3 | C(372)-C(373)-H(373) | 120.6 |
| C(368)-C(367)-H(367) | 117.3 | C(375)-C(374)-C(373) | 117.9 |
| C(367)-C(368)-C(369) | 115.2 | C(375)-C(374)-H(374) | 121.0 |
| C(367)-C(368)-H(368) | 122.4 | C(373)-C(374)-H(374) | 121.0 |
| C(369)-C(368)-H(368) | 122.4 | C(374)-C(375)-C(376) | 122.0 |
| C(370)-C(369)-C(368) | 122.5 | C(374)-C(375)-H(375) | 119.0 |
| C(370)-C(369)-H(369) | 118.7 | C(376)-C(375)-H(375) | 119.0 |
| C(368)-C(369)-H(369) | 118.7 | N(16B)-C(376)-C(375) | 123.4 |
| C(369)-C(370)-C(371) | 118.3 | N(16B)-C(376)-H(376) | 118.3 |
| C(369)-C(370)-H(370) | 120.8 | C(375)-C(376)-H(376) | 118.3 |

---

**Table S5.** Anisotropic displacement parameters ( $\text{\AA}^2 \times 10^3$ ) for **1**.The anisotropic displacement factor exponent takes the form:  $-2\pi^2 [ h^2 a^{*2}U^{11} + \dots + 2 h k a^* b^* U^{12} ]$ 

|       | $U^{11}$ | $U^{22}$ | $U^{33}$ | $U^{23}$ | $U^{13}$ | $U^{12}$ |
|-------|----------|----------|----------|----------|----------|----------|
| Th(1) | 12(1)    | 12(1)    | 18(1)    | -2(1)    | 3(1)     | 0(1)     |
| S(1)  | 16(3)    | 17(3)    | 23(3)    | 0(2)     | 2(3)     | 3(2)     |
| S(2)  | 21(3)    | 15(3)    | 22(3)    | -1(2)    | 0(2)     | -1(2)    |
| S(3)  | 23(4)    | 16(3)    | 23(3)    | -1(3)    | -1(3)    | 3(3)     |
| S(4)  | 21(3)    | 19(3)    | 25(3)    | 2(3)     | 8(3)     | 4(3)     |
| N(1)  | 16(7)    | 15(6)    | 15(6)    | -5(5)    | -5(5)    | 4(5)     |
| N(2)  | 19(7)    | 15(6)    | 17(6)    | -5(6)    | 1(5)     | -2(6)    |
| N(3)  | 17(6)    | 13(6)    | 13(6)    | 0(5)     | -4(6)    | 3(6)     |
| N(4)  | 13(6)    | 22(7)    | 19(7)    | 0(6)     | 4(6)     | -3(5)    |
| C(1)  | 20(8)    | 17(7)    | 21(7)    | 1(6)     | 0(6)     | 6(6)     |
| C(2)  | 30(8)    | 22(7)    | 31(7)    | 1(7)     | -4(7)    | 0(7)     |
| C(3)  | 33(8)    | 28(7)    | 33(7)    | -6(7)    | -3(7)    | 4(7)     |
| C(4)  | 34(8)    | 30(8)    | 24(7)    | -6(6)    | -1(7)    | 11(7)    |
| C(5)  | 25(8)    | 26(7)    | 23(7)    | 3(6)     | 3(7)     | 9(7)     |
| C(6)  | 19(8)    | 21(7)    | 23(7)    | 2(6)     | 0(6)     | 6(6)     |
| C(7)  | 15(7)    | 20(7)    | 24(7)    | 3(6)     | 4(6)     | 3(6)     |
| C(8)  | 19(7)    | 16(7)    | 23(7)    | 5(6)     | 2(6)     | 0(6)     |
| C(9)  | 19(7)    | 15(7)    | 27(7)    | 3(6)     | 10(6)    | 1(6)     |
| C(10) | 26(8)    | 23(8)    | 27(7)    | 0(7)     | 5(6)     | 3(7)     |
| C(11) | 21(7)    | 24(8)    | 27(7)    | -4(7)    | 1(6)     | 1(7)     |
| C(12) | 21(7)    | 22(8)    | 26(7)    | 0(7)     | 4(6)     | 4(6)     |
| C(13) | 25(8)    | 24(7)    | 21(7)    | 0(6)     | -5(6)    | 5(7)     |
| C(14) | 33(8)    | 27(7)    | 31(8)    | -1(7)    | 3(7)     | 3(7)     |
| C(15) | 32(8)    | 25(7)    | 34(8)    | -8(6)    | -2(7)    | 3(7)     |
| C(16) | 32(8)    | 33(7)    | 29(7)    | -9(7)    | 2(7)     | 9(7)     |
| C(17) | 27(8)    | 32(7)    | 29(7)    | 1(7)     | -4(6)    | 7(7)     |
| C(18) | 25(8)    | 26(7)    | 27(7)    | -2(6)    | -1(6)    | 2(7)     |
| C(19) | 25(7)    | 19(7)    | 20(7)    | 5(6)     | 2(6)     | 0(7)     |
| C(20) | 23(7)    | 22(7)    | 26(7)    | 3(6)     | 4(6)     | 2(6)     |
| C(21) | 27(7)    | 28(8)    | 33(8)    | -3(7)    | 4(6)     | 4(7)     |
| C(22) | 25(8)    | 30(8)    | 28(8)    | -1(6)    | 4(7)     | 6(7)     |
| C(23) | 28(7)    | 26(8)    | 28(8)    | -3(6)    | 6(7)     | 4(7)     |

|       |       |       |       |       |       |       |
|-------|-------|-------|-------|-------|-------|-------|
| C(24) | 23(7) | 22(7) | 20(7) | 0(6)  | 3(6)  | 2(6)  |
| C(25) | 21(7) | 20(7) | 26(7) | 0(6)  | -1(6) | -1(6) |
| C(26) | 23(7) | 26(7) | 28(8) | 3(7)  | -4(6) | -1(7) |
| C(27) | 18(7) | 29(7) | 23(7) | -2(7) | 7(6)  | 3(6)  |
| C(28) | 21(7) | 22(7) | 25(8) | -4(6) | 2(6)  | 4(6)  |
| C(29) | 19(6) | 14(6) | 18(7) | -3(6) | 0(5)  | 4(5)  |
| C(30) | 17(6) | 16(6) | 19(7) | -5(6) | -2(5) | 2(6)  |
| C(31) | 23(7) | 14(6) | 21(7) | -7(6) | -1(6) | 3(6)  |
| C(32) | 30(8) | 16(7) | 28(8) | -3(7) | -1(6) | 2(6)  |
| C(33) | 25(7) | 20(7) | 24(7) | -2(7) | 0(6)  | -4(6) |
| C(34) | 20(7) | 16(7) | 21(7) | -4(6) | -1(6) | -3(6) |
| C(35) | 17(7) | 20(7) | 13(7) | 1(6)  | -1(6) | 3(6)  |
| C(36) | 20(7) | 23(7) | 17(7) | 4(6)  | 0(6)  | -4(6) |
| C(37) | 19(7) | 23(7) | 20(7) | 7(6)  | 4(6)  | -3(6) |
| C(38) | 21(6) | 16(7) | 20(7) | 2(6)  | -2(6) | 5(6)  |
| C(39) | 18(6) | 10(6) | 21(7) | 4(5)  | -4(6) | 3(6)  |
| C(40) | 19(6) | 17(6) | 18(7) | -3(5) | 0(6)  | -2(6) |
| C(41) | 24(7) | 14(7) | 23(7) | 2(6)  | 10(6) | -3(6) |
| C(42) | 27(7) | 13(7) | 22(7) | 0(6)  | 2(7)  | -2(6) |
| C(43) | 27(7) | 17(7) | 26(8) | 2(6)  | -1(7) | -1(7) |
| C(44) | 20(7) | 18(7) | 23(7) | -2(6) | -7(6) | 0(6)  |
| Th(2) | 14(1) | 13(1) | 18(1) | -1(1) | 2(1)  | 1(1)  |
| S(5)  | 15(3) | 20(3) | 22(3) | 2(2)  | 2(2)  | 2(2)  |
| S(6)  | 18(3) | 17(3) | 19(3) | -1(2) | 2(2)  | 1(2)  |
| S(7)  | 24(4) | 19(3) | 24(3) | -2(3) | -1(3) | -2(3) |
| S(8)  | 20(3) | 21(3) | 25(3) | 4(3)  | 3(3)  | 1(3)  |
| N(5)  | 12(6) | 18(6) | 16(6) | 2(6)  | -3(5) | -1(5) |
| N(6)  | 17(7) | 23(7) | 18(7) | 4(6)  | -1(5) | -1(6) |
| N(7)  | 23(7) | 14(7) | 20(7) | -4(6) | -3(6) | 2(6)  |
| N(8)  | 19(6) | 14(6) | 16(6) | 1(5)  | -1(6) | -1(5) |
| C(45) | 16(7) | 25(7) | 18(7) | -4(6) | -3(6) | 4(6)  |
| C(46) | 19(8) | 22(7) | 21(7) | -5(6) | -2(6) | 4(6)  |
| C(47) | 29(8) | 31(7) | 22(7) | -2(6) | -4(7) | 2(7)  |
| C(48) | 25(8) | 34(8) | 16(7) | -1(6) | -4(7) | 7(7)  |
| C(49) | 22(8) | 31(7) | 25(7) | 6(6)  | -2(7) | 8(7)  |
| C(50) | 17(7) | 25(7) | 24(7) | 2(6)  | -4(6) | 2(6)  |



|       |       |       |       |       |       |       |
|-------|-------|-------|-------|-------|-------|-------|
| C(51) | 19(7) | 14(7) | 26(7) | -1(6) | 2(6)  | 3(6)  |
| C(52) | 17(7) | 19(7) | 25(7) | 7(6)  | 1(6)  | 3(6)  |
| C(53) | 29(8) | 32(8) | 29(7) | 6(7)  | 7(6)  | 1(7)  |
| C(54) | 35(8) | 30(8) | 24(7) | 3(7)  | 3(6)  | 3(7)  |
| C(55) | 34(8) | 28(8) | 31(7) | -2(7) | -6(7) | -4(7) |
| C(56) | 26(7) | 15(7) | 30(7) | 0(7)  | 1(6)  | 2(6)  |
| C(57) | 20(8) | 25(7) | 17(7) | -4(6) | -4(6) | 3(7)  |
| C(58) | 20(7) | 18(7) | 23(7) | 0(6)  | -1(6) | 3(6)  |
| C(59) | 20(8) | 20(7) | 24(7) | 0(6)  | 1(6)  | 7(6)  |
| C(60) | 22(8) | 30(7) | 22(7) | -1(6) | 2(6)  | 3(7)  |
| C(61) | 23(8) | 35(7) | 25(7) | 2(7)  | 2(6)  | -1(7) |
| C(62) | 27(8) | 29(7) | 24(7) | 1(6)  | -5(6) | -4(7) |
| C(63) | 24(7) | 21(7) | 13(7) | 2(6)  | 1(6)  | 5(7)  |
| C(64) | 22(7) | 22(7) | 11(7) | 1(6)  | -3(6) | 4(6)  |
| C(65) | 21(7) | 25(8) | 22(7) | -3(6) | 6(6)  | 5(6)  |
| C(66) | 26(7) | 24(8) | 21(7) | -4(6) | 8(6)  | 5(7)  |
| C(67) | 27(7) | 24(8) | 19(7) | -2(6) | 4(6)  | 1(7)  |
| C(68) | 23(7) | 26(7) | 18(7) | 0(6)  | 4(6)  | -1(6) |
| C(69) | 23(7) | 18(6) | 21(7) | 1(6)  | 4(6)  | -3(6) |
| C(70) | 21(7) | 24(7) | 23(7) | 5(7)  | 5(6)  | 3(6)  |
| C(71) | 19(7) | 27(7) | 22(7) | 7(7)  | 7(6)  | 7(6)  |
| C(72) | 20(7) | 24(7) | 25(8) | 2(6)  | 4(6)  | 3(6)  |
| C(73) | 14(6) | 21(6) | 22(7) | 2(6)  | -1(5) | -4(6) |
| C(74) | 18(7) | 23(6) | 21(7) | 3(6)  | 1(6)  | -2(6) |
| C(75) | 24(7) | 22(6) | 24(7) | 3(6)  | -1(6) | 2(6)  |
| C(76) | 25(7) | 24(7) | 24(7) | 2(6)  | -2(6) | -1(6) |
| C(77) | 18(7) | 26(7) | 26(8) | 1(7)  | -5(6) | -1(6) |
| C(78) | 18(7) | 27(7) | 27(7) | 5(7)  | -3(6) | -2(6) |
| C(79) | 26(7) | 19(7) | 17(7) | -2(6) | 0(6)  | 4(6)  |
| C(80) | 25(7) | 24(7) | 19(7) | -1(6) | 4(7)  | -1(7) |
| C(81) | 22(7) | 23(7) | 21(7) | 4(6)  | 4(6)  | -1(6) |
| C(82) | 21(7) | 19(7) | 18(7) | 1(6)  | 2(6)  | 2(6)  |
| C(83) | 21(6) | 15(6) | 18(7) | 1(5)  | 0(6)  | 2(6)  |
| C(84) | 20(6) | 19(6) | 21(7) | -1(6) | 2(6)  | 0(6)  |
| C(85) | 21(7) | 21(7) | 25(7) | -2(6) | 1(6)  | 5(6)  |
| C(86) | 30(7) | 18(7) | 24(8) | -2(6) | -2(7) | 5(6)  |

|        |       |       |       |       |       |       |
|--------|-------|-------|-------|-------|-------|-------|
| C(87)  | 24(7) | 17(7) | 19(7) | -2(6) | -1(7) | 1(6)  |
| C(88)  | 23(7) | 19(7) | 20(7) | -2(6) | -3(6) | -1(6) |
| Th(3)  | 14(1) | 12(1) | 17(1) | -2(1) | 2(1)  | 1(1)  |
| S(9)   | 18(3) | 23(3) | 16(3) | -3(2) | 1(2)  | -2(3) |
| S(10)  | 21(3) | 16(3) | 20(3) | 3(2)  | 1(2)  | 2(2)  |
| S(11)  | 19(3) | 27(3) | 16(3) | -5(3) | -1(2) | 1(3)  |
| S(12)  | 23(3) | 16(3) | 17(3) | -4(2) | 1(2)  | 0(3)  |
| N(9)   | 19(7) | 19(6) | 18(7) | -3(6) | 3(6)  | -1(6) |
| N(10)  | 14(6) | 17(6) | 16(6) | -2(6) | 1(5)  | 2(5)  |
| N(11)  | 26(7) | 19(7) | 22(7) | -6(6) | 11(6) | -4(6) |
| N(12)  | 19(6) | 16(6) | 19(7) | -3(6) | 3(6)  | 0(5)  |
| C(89)  | 16(8) | 20(7) | 23(7) | 0(6)  | -1(6) | 4(6)  |
| C(90)  | 23(8) | 21(7) | 29(7) | 0(7)  | -2(7) | 2(6)  |
| C(91)  | 32(8) | 31(8) | 34(7) | -3(7) | -8(7) | 2(7)  |
| C(92)  | 30(8) | 35(8) | 28(7) | -7(7) | -2(7) | 2(7)  |
| C(93)  | 23(8) | 34(8) | 26(7) | 6(7)  | 3(7)  | 3(7)  |
| C(94)  | 21(8) | 29(7) | 29(7) | 3(6)  | 2(7)  | 2(7)  |
| C(95)  | 18(7) | 19(7) | 19(7) | -2(6) | 0(6)  | -3(6) |
| C(96)  | 24(7) | 28(8) | 27(7) | 1(7)  | 3(6)  | -5(7) |
| C(97)  | 24(8) | 31(8) | 27(7) | -1(7) | 7(6)  | -4(7) |
| C(98)  | 27(8) | 26(8) | 27(7) | -1(7) | 9(6)  | -2(7) |
| C(99)  | 25(8) | 24(8) | 23(7) | -1(7) | 0(6)  | 2(7)  |
| C(100) | 21(7) | 24(8) | 22(7) | 0(6)  | 1(6)  | -2(6) |
| C(101) | 21(7) | 22(7) | 13(7) | 0(6)  | -6(6) | 1(7)  |
| C(102) | 28(8) | 25(7) | 22(7) | 2(6)  | 1(6)  | -3(7) |
| C(103) | 29(8) | 28(7) | 26(8) | -5(6) | 1(7)  | -3(7) |
| C(104) | 30(8) | 35(7) | 21(7) | -5(7) | 2(6)  | 4(7)  |
| C(105) | 25(8) | 32(8) | 22(7) | 1(7)  | 1(6)  | 1(7)  |
| C(106) | 21(7) | 26(7) | 21(7) | -1(6) | -2(6) | -3(6) |
| C(107) | 27(7) | 21(7) | 23(7) | 4(6)  | 0(6)  | 5(7)  |
| C(108) | 23(7) | 25(7) | 27(7) | 2(6)  | -2(7) | 1(7)  |
| C(109) | 24(7) | 25(8) | 38(8) | 3(7)  | 7(6)  | 4(7)  |
| C(110) | 35(8) | 22(8) | 31(8) | -1(7) | 2(7)  | 8(7)  |
| C(111) | 32(7) | 23(7) | 21(7) | 3(6)  | -6(6) | 6(7)  |
| C(112) | 26(7) | 21(7) | 18(7) | 4(6)  | 0(6)  | 2(6)  |
| C(113) | 16(7) | 23(7) | 25(7) | -6(6) | 5(6)  | 0(6)  |

|        |       |       |       |       |       |       |
|--------|-------|-------|-------|-------|-------|-------|
| C(114) | 15(7) | 26(7) | 18(7) | 2(7)  | 2(6)  | 2(6)  |
| C(115) | 21(7) | 29(7) | 23(7) | -2(7) | 5(6)  | 1(6)  |
| C(116) | 24(7) | 24(7) | 22(7) | 0(6)  | 3(6)  | 4(6)  |
| C(117) | 18(6) | 20(6) | 15(7) | -4(6) | -2(5) | 1(6)  |
| C(118) | 12(6) | 18(6) | 17(6) | -2(6) | -3(5) | 3(6)  |
| C(119) | 20(7) | 16(6) | 26(7) | -5(6) | 0(6)  | 1(6)  |
| C(120) | 24(7) | 18(7) | 26(7) | -6(7) | 2(6)  | -2(6) |
| C(121) | 23(7) | 20(7) | 22(7) | -3(7) | 3(6)  | -1(6) |
| C(122) | 17(7) | 19(7) | 16(7) | -2(6) | 0(6)  | 2(6)  |
| C(123) | 23(7) | 19(7) | 24(7) | 4(6)  | 2(6)  | -2(6) |
| C(124) | 26(7) | 18(7) | 26(8) | 7(6)  | 3(7)  | -6(7) |
| C(125) | 25(7) | 22(7) | 31(8) | 6(6)  | 5(7)  | -1(6) |
| C(126) | 24(7) | 22(7) | 30(8) | 0(6)  | 7(7)  | 3(6)  |
| C(127) | 21(6) | 18(6) | 21(7) | -2(6) | 9(6)  | 0(6)  |
| C(128) | 22(6) | 16(6) | 18(7) | 0(5)  | 4(6)  | 3(6)  |
| C(129) | 20(7) | 16(7) | 21(7) | 2(6)  | 1(6)  | 4(6)  |
| C(130) | 28(7) | 23(7) | 24(8) | -6(6) | 1(7)  | 4(6)  |
| C(131) | 24(7) | 25(7) | 17(7) | -7(6) | 1(7)  | -3(7) |
| C(132) | 19(7) | 18(7) | 16(7) | 1(6)  | 5(6)  | -1(6) |
| Th(4)  | 12(1) | 12(1) | 19(1) | -1(1) | 2(1)  | 1(1)  |
| S(13)  | 13(3) | 18(3) | 22(3) | -2(2) | -1(2) | -3(2) |
| S(14)  | 21(3) | 16(3) | 19(3) | 0(2)  | 0(2)  | -1(2) |
| S(15)  | 17(3) | 19(3) | 17(3) | -4(2) | 3(2)  | 2(3)  |
| S(16)  | 18(3) | 21(3) | 21(3) | 4(2)  | 7(2)  | 0(3)  |
| N(13)  | 16(6) | 21(6) | 17(6) | 2(6)  | 1(5)  | 7(5)  |
| N(14)  | 19(7) | 18(7) | 26(7) | 0(6)  | 4(6)  | 2(6)  |
| N(15)  | 17(6) | 18(7) | 15(7) | -7(6) | 4(6)  | -5(6) |
| N(16)  | 15(6) | 16(6) | 18(7) | 4(5)  | 1(6)  | -4(5) |
| C(133) | 17(6) | 22(5) | 22(5) | -3(5) | -2(5) | 0(5)  |
| C(134) | 17(6) | 18(5) | 17(5) | -1(5) | -1(5) | 0(5)  |
| C(135) | 22(5) | 21(5) | 21(5) | -4(5) | 1(5)  | -2(5) |
| C(136) | 19(6) | 21(5) | 19(5) | 1(5)  | -2(5) | 3(5)  |
| C(137) | 22(6) | 24(6) | 24(5) | 0(5)  | -2(5) | 0(5)  |
| C(138) | 18(6) | 23(5) | 23(5) | 0(5)  | -1(5) | -2(5) |
| C(139) | 21(5) | 23(6) | 20(5) | 1(5)  | 3(5)  | 3(5)  |
| C(140) | 21(5) | 20(5) | 25(5) | 1(5)  | 1(5)  | 5(5)  |

|        |       |       |       |       |       |       |
|--------|-------|-------|-------|-------|-------|-------|
| C(141) | 24(5) | 25(5) | 27(5) | 3(5)  | 3(5)  | -1(5) |
| C(142) | 27(6) | 23(6) | 23(5) | 0(5)  | 2(5)  | 5(5)  |
| C(143) | 20(6) | 20(6) | 25(6) | -2(6) | -1(5) | 7(5)  |
| C(144) | 23(6) | 19(6) | 24(6) | 3(5)  | -2(5) | 2(5)  |
| C(145) | 19(7) | 27(7) | 19(7) | -3(6) | -2(6) | 1(7)  |
| C(146) | 25(8) | 29(7) | 29(8) | -7(7) | -1(6) | -4(7) |
| C(147) | 31(8) | 31(7) | 28(8) | -6(7) | -5(7) | 3(7)  |
| C(148) | 29(8) | 40(8) | 24(8) | -1(7) | 3(6)  | 7(7)  |
| C(149) | 21(8) | 41(7) | 17(7) | 1(7)  | 5(6)  | 7(7)  |
| C(150) | 22(8) | 27(7) | 20(7) | 1(6)  | -3(6) | 1(6)  |
| C(151) | 19(7) | 15(7) | 12(7) | 9(6)  | -1(6) | 1(6)  |
| C(152) | 22(7) | 18(7) | 23(7) | 3(6)  | 0(6)  | 1(6)  |
| C(153) | 24(7) | 19(7) | 29(8) | 0(6)  | 3(6)  | -3(6) |
| C(154) | 27(7) | 22(7) | 27(8) | -2(6) | 6(7)  | 1(7)  |
| C(155) | 28(7) | 22(7) | 21(7) | -6(6) | -1(6) | 3(7)  |
| C(156) | 22(7) | 22(7) | 15(7) | 3(6)  | -4(6) | 0(6)  |
| C(157) | 21(6) | 19(6) | 22(6) | -1(5) | 1(5)  | 0(5)  |
| C(158) | 23(6) | 22(5) | 22(6) | 2(5)  | 1(5)  | -1(5) |
| C(159) | 20(6) | 25(6) | 21(6) | 2(5)  | 9(5)  | 1(5)  |
| C(160) | 21(7) | 21(7) | 19(7) | 2(6)  | 5(6)  | 3(6)  |
| C(161) | 17(6) | 19(6) | 16(6) | 0(6)  | -1(5) | 0(6)  |
| C(162) | 16(6) | 21(6) | 23(7) | -2(6) | -1(5) | 1(6)  |
| C(163) | 18(7) | 17(6) | 26(7) | 0(6)  | 0(6)  | 4(6)  |
| C(164) | 26(7) | 13(6) | 30(8) | 3(6)  | 0(6)  | 6(6)  |
| C(165) | 21(7) | 19(7) | 26(8) | -4(7) | 2(6)  | -2(6) |
| C(166) | 16(7) | 16(7) | 30(8) | -2(6) | 0(6)  | 1(6)  |
| C(167) | 16(7) | 19(7) | 20(7) | -3(6) | 4(6)  | -8(6) |
| C(168) | 17(7) | 27(7) | 26(8) | 6(6)  | 2(7)  | -7(7) |
| C(169) | 16(7) | 30(8) | 25(8) | 8(6)  | 3(6)  | -1(6) |
| C(170) | 16(6) | 27(7) | 18(7) | 3(6)  | 2(6)  | 4(6)  |
| C(171) | 17(6) | 15(6) | 20(7) | 0(5)  | -2(6) | 3(6)  |
| C(172) | 20(6) | 16(6) | 19(7) | 0(5)  | -4(6) | 0(6)  |
| C(173) | 20(7) | 15(7) | 25(7) | 1(6)  | 8(6)  | 2(6)  |
| C(174) | 25(6) | 19(6) | 24(6) | -5(5) | 2(6)  | 3(5)  |
| C(175) | 22(5) | 23(5) | 23(6) | 1(5)  | 2(5)  | 2(5)  |
| C(176) | 18(6) | 22(6) | 23(6) | 1(5)  | 1(5)  | 0(5)  |

**Table S6.** Hydrogen coordinates ( $\times 10^4$ ) and isotropic displacement parameters ( $\text{\AA}^2 \times 10^{-3}$ ) for **1**.

|       | x     | y    | z     | U(eq) |
|-------|-------|------|-------|-------|
| H(2)  | -4503 | 3036 | -1004 | 33    |
| H(3)  | -4783 | 2920 | -1923 | 38    |
| H(4)  | -4512 | 3559 | -2589 | 35    |
| H(5)  | -4156 | 4336 | -2314 | 30    |
| H(6)  | -3836 | 4442 | -1400 | 25    |
| H(8)  | -3841 | 2365 | 1006  | 23    |
| H(9)  | -3967 | 2124 | 1921  | 24    |
| H(10) | -3349 | 2325 | 2597  | 30    |
| H(11) | -2583 | 2794 | 2373  | 29    |
| H(12) | -2444 | 3021 | 1460  | 28    |
| H(14) | -2359 | 5205 | 1309  | 36    |
| H(15) | -2724 | 5663 | 2047  | 37    |
| H(16) | -3228 | 5223 | 2686  | 37    |
| H(17) | -3359 | 4314 | 2605  | 35    |
| H(18) | -3050 | 3856 | 1845  | 31    |
| H(20) | -1756 | 4608 | -1361 | 28    |
| H(21) | -1296 | 4166 | -2050 | 35    |
| H(22) | -1716 | 3557 | -2601 | 33    |
| H(23) | -2563 | 3255 | -2386 | 33    |
| H(24) | -3040 | 3722 | -1736 | 26    |
| H(25) | -3887 | 3442 | 884   | 27    |
| H(26) | -4583 | 3613 | 1406  | 31    |
| H(27) | -4892 | 4471 | 1511  | 28    |
| H(28) | -4384 | 5189 | 1149  | 27    |
| H(31) | -3814 | 5758 | 955   | 23    |
| H(32) | -3234 | 6373 | 582   | 29    |
| H(33) | -2521 | 6083 | 73    | 28    |
| H(34) | -2444 | 5183 | -122  | 23    |
| H(35) | -1681 | 4418 | 153   | 20    |
| H(36) | -799  | 4354 | -101  | 24    |
| H(37) | -540  | 3669 | -648  | 25    |

|       |       |      |       |    |
|-------|-------|------|-------|----|
| H(38) | -1165 | 3047 | -960  | 23 |
| H(41) | -1734 | 2483 | -1158 | 24 |
| H(42) | -2435 | 1959 | -1497 | 25 |
| H(43) | -3314 | 2209 | -1326 | 28 |
| H(44) | -3449 | 2950 | -794  | 24 |
| H(46) | -1939 | 5518 | -1105 | 25 |
| H(47) | -2164 | 5468 | -2041 | 33 |
| H(48) | -1977 | 6157 | -2635 | 30 |
| H(49) | -1642 | 6931 | -2292 | 31 |
| H(50) | -1383 | 7010 | -1379 | 26 |
| H(52) | -1340 | 4874 | 1040  | 25 |
| H(53) | -1466 | 4662 | 1962  | 36 |
| H(54) | -837  | 4865 | 2613  | 36 |
| H(55) | -76   | 5343 | 2374  | 37 |
| H(56) | 62    | 5557 | 1436  | 28 |
| H(58) | 172   | 7698 | 1343  | 24 |
| H(59) | -214  | 8171 | 2057  | 26 |
| H(60) | -777  | 7762 | 2651  | 30 |
| H(61) | -975  | 6873 | 2559  | 33 |
| H(62) | -636  | 6400 | 1829  | 32 |
| H(64) | 771   | 7056 | -1274 | 22 |
| H(65) | 1280  | 6581 | -1905 | 27 |
| H(66) | 876   | 5951 | -2474 | 28 |
| H(67) | -3    | 5744 | -2338 | 28 |
| H(68) | -516  | 6232 | -1753 | 27 |
| H(69) | -1452 | 5935 | 839   | 25 |
| H(70) | -2164 | 6107 | 1371  | 27 |
| H(71) | -2421 | 6993 | 1515  | 27 |
| H(72) | -1896 | 7670 | 1184  | 28 |
| H(75) | -1324 | 8219 | 990   | 28 |
| H(76) | -716  | 8850 | 699   | 29 |
| H(77) | -2    | 8576 | 129   | 28 |
| H(78) | 48    | 7692 | -99   | 29 |
| H(79) | 782   | 6932 | 171   | 25 |
| H(80) | 1662  | 6885 | -47   | 27 |
| H(81) | 1970  | 6157 | -575  | 26 |

|        |       |      |       |    |
|--------|-------|------|-------|----|
| H(82)  | 1348  | 5528 | -868  | 23 |
| H(85)  | 780   | 4964 | -1099 | 27 |
| H(86)  | 110   | 4446 | -1465 | 29 |
| H(87)  | -789  | 4720 | -1368 | 24 |
| H(88)  | -945  | 5440 | -792  | 25 |
| H(90)  | 1958  | 3210 | 997   | 29 |
| H(91)  | 2218  | 3348 | 1888  | 39 |
| H(92)  | 1971  | 2758 | 2556  | 37 |
| H(93)  | 1507  | 1979 | 2312  | 33 |
| H(94)  | 1310  | 1808 | 1400  | 31 |
| H(96)  | 1338  | 3844 | -954  | 32 |
| H(97)  | 1559  | 4090 | -1837 | 33 |
| H(98)  | 1022  | 3832 | -2577 | 32 |
| H(99)  | 270   | 3353 | -2423 | 29 |
| H(100) | 3     | 3124 | -1517 | 27 |
| H(102) | -276  | 1052 | -1315 | 30 |
| H(103) | 75    | 507  | -1984 | 33 |
| H(104) | 741   | 818  | -2546 | 34 |
| H(105) | 1026  | 1706 | -2443 | 31 |
| H(106) | 617   | 2270 | -1819 | 27 |
| H(108) | -854  | 1801 | 1311  | 30 |
| H(109) | -1241 | 2295 | 2003  | 35 |
| H(110) | -757  | 2887 | 2534  | 35 |
| H(111) | 152   | 2937 | 2425  | 30 |
| H(112) | 549   | 2484 | 1703  | 26 |
| H(113) | 1378  | 2769 | -849  | 25 |
| H(114) | 2114  | 2577 | -1385 | 23 |
| H(115) | 2353  | 1701 | -1533 | 29 |
| H(116) | 1810  | 1029 | -1166 | 28 |
| H(119) | 1288  | 466  | -905  | 25 |
| H(120) | 665   | -157 | -576  | 27 |
| H(121) | -36   | 167  | -62   | 26 |
| H(122) | -109  | 1055 | 90    | 21 |
| H(123) | -848  | 1817 | -199  | 27 |
| H(124) | -1714 | 1840 | 39    | 28 |
| H(125) | -1999 | 2551 | 585   | 31 |

|        |       |      |       |    |
|--------|-------|------|-------|----|
| H(126) | -1399 | 3173 | 906   | 30 |
| H(129) | -816  | 3732 | 1128  | 23 |
| H(130) | -158  | 4242 | 1535  | 30 |
| H(131) | 726   | 3995 | 1351  | 27 |
| H(132) | 891   | 3272 | 811   | 21 |
| H(134) | 4528  | 5698 | 977   | 21 |
| H(135) | 4802  | 5881 | 1882  | 26 |
| H(136) | 4611  | 5269 | 2592  | 24 |
| H(137) | 4067  | 4557 | 2389  | 28 |
| H(138) | 3799  | 4378 | 1504  | 26 |
| H(140) | 3749  | 6251 | -1138 | 26 |
| H(141) | 3810  | 6434 | -2049 | 30 |
| H(142) | 3105  | 6236 | -2665 | 29 |
| H(143) | 2320  | 5862 | -2282 | 26 |
| H(144) | 2298  | 5673 | -1371 | 26 |
| H(146) | 2384  | 3491 | -1264 | 33 |
| H(147) | 2839  | 3012 | -1942 | 36 |
| H(148) | 3464  | 3469 | -2470 | 37 |
| H(149) | 3576  | 4343 | -2390 | 32 |
| H(150) | 3127  | 4852 | -1726 | 28 |
| H(152) | 1652  | 4182 | 1263  | 25 |
| H(153) | 1101  | 4652 | 1850  | 29 |
| H(154) | 1441  | 5297 | 2428  | 30 |
| H(155) | 2326  | 5504 | 2414  | 28 |
| H(156) | 2899  | 5028 | 1835  | 23 |
| H(157) | 3866  | 5264 | -812  | 24 |
| H(158) | 4619  | 5067 | -1330 | 27 |
| H(159) | 4839  | 4186 | -1467 | 26 |
| H(160) | 4366  | 3528 | -1061 | 24 |
| H(163) | 3800  | 2950 | -839  | 24 |
| H(164) | 3173  | 2342 | -530  | 28 |
| H(165) | 2453  | 2671 | -39   | 27 |
| H(166) | 2438  | 3550 | 187   | 25 |
| H(167) | 1679  | 4295 | -109  | 22 |
| H(168) | 785   | 4373 | 67    | 28 |
| H(169) | 518   | 5115 | 585   | 28 |



|        |      |       |       |    |
|--------|------|-------|-------|----|
| H(170) | 1122 | 5719  | 925   | 24 |
| H(173) | 1700 | 6264  | 1182  | 24 |
| H(174) | 2400 | 6769  | 1562  | 27 |
| H(175) | 3238 | 6501  | 1409  | 27 |
| H(176) | 3417 | 5780  | 888   | 25 |
| H(202) | 4543 | 613   | 956   | 24 |
| H(203) | 4854 | 641   | 1872  | 24 |
| H(204) | 4472 | 44    | 2520  | 24 |
| H(205) | 3980 | -646  | 2224  | 24 |
| H(206) | 3640 | -663  | 1310  | 24 |
| H(208) | 3781 | 1458  | -1062 | 24 |
| H(209) | 3929 | 1703  | -1972 | 24 |
| H(210) | 3345 | 1471  | -2670 | 24 |
| H(211) | 2645 | 891   | -2488 | 24 |
| H(212) | 2509 | 619   | -1588 | 24 |
| H(214) | 2319 | -1482 | -1357 | 24 |
| H(215) | 2751 | -2005 | -2002 | 24 |
| H(216) | 3266 | -1618 | -2668 | 24 |
| H(217) | 3425 | -711  | -2640 | 24 |
| H(218) | 2989 | -174  | -2017 | 24 |
| H(220) | 1683 | -855  | 1219  | 24 |
| H(221) | 1209 | -386  | 1879  | 24 |
| H(222) | 1631 | 203   | 2451  | 24 |
| H(223) | 2501 | 466   | 2280  | 24 |
| H(224) | 2985 | -20   | 1652  | 24 |
| H(225) | 3868 | 297   | -964  | 24 |
| H(226) | 4613 | 128   | -1409 | 24 |
| H(227) | 4846 | -731  | -1635 | 24 |
| H(228) | 4298 | -1447 | -1335 | 24 |
| H(231) | 3756 | -2012 | -1099 | 24 |
| H(232) | 3097 | -2602 | -843  | 24 |
| H(233) | 2456 | -2336 | -226  | 24 |
| H(234) | 2457 | -1463 | 82    | 24 |
| H(235) | 1640 | -666  | -314  | 24 |
| H(236) | 769  | -648  | -15   | 24 |
| H(237) | 492  | 46    | 511   | 24 |

|        |      |      |       |    |
|--------|------|------|-------|----|
| H(238) | 1106 | 682  | 819   | 24 |
| H(241) | 1672 | 1235 | 1051  | 24 |
| H(242) | 2362 | 1800 | 1337  | 24 |
| H(243) | 3246 | 1549 | 1190  | 24 |
| H(244) | 3394 | 770  | 723   | 24 |
| H(246) | 7136 | 3183 | 1128  | 24 |
| H(247) | 7398 | 3143 | 2054  | 24 |
| H(248) | 7053 | 2513 | 2638  | 24 |
| H(249) | 6509 | 1870 | 2292  | 24 |
| H(250) | 6272 | 1843 | 1370  | 24 |
| H(252) | 6298 | 4002 | -1036 | 24 |
| H(253) | 6460 | 4124 | -1968 | 24 |
| H(254) | 5889 | 3797 | -2621 | 24 |
| H(255) | 5159 | 3279 | -2368 | 24 |
| H(256) | 5004 | 3127 | -1420 | 24 |
| H(258) | 4803 | 1094 | -1226 | 24 |
| H(259) | 5108 | 591  | -1962 | 24 |
| H(260) | 5634 | 964  | -2615 | 24 |
| H(261) | 5935 | 1824 | -2519 | 24 |
| H(262) | 5631 | 2342 | -1804 | 24 |
| H(264) | 4295 | 1715 | 1396  | 24 |
| H(265) | 3781 | 2201 | 2013  | 24 |
| H(266) | 4142 | 2941 | 2456  | 24 |
| H(267) | 5030 | 3125 | 2344  | 24 |
| H(268) | 5528 | 2680 | 1712  | 24 |
| H(269) | 6461 | 2884 | -819  | 24 |
| H(270) | 7137 | 2710 | -1397 | 24 |
| H(271) | 7354 | 1823 | -1598 | 24 |
| H(272) | 6888 | 1148 | -1177 | 24 |
| H(275) | 6322 | 600  | -963  | 24 |
| H(276) | 5753 | -38  | -609  | 24 |
| H(277) | 5025 | 245  | -61   | 24 |
| H(278) | 4973 | 1133 | 153   | 24 |
| H(279) | 4234 | 1882 | -101  | 24 |
| H(280) | 3352 | 1945 | 106   | 24 |
| H(281) | 3064 | 2641 | 692   | 24 |

|        |      |      |       |    |
|--------|------|------|-------|----|
| H(282) | 3680 | 3298 | 926   | 24 |
| H(285) | 4250 | 3865 | 1142  | 24 |
| H(286) | 4924 | 4393 | 1483  | 24 |
| H(287) | 5822 | 4120 | 1374  | 24 |
| H(288) | 5970 | 3397 | 800   | 24 |
| H(290) | 3050 | 5522 | -1014 | 24 |
| H(291) | 2723 | 5377 | -1880 | 24 |
| H(292) | 2845 | 6004 | -2553 | 24 |
| H(293) | 3382 | 6751 | -2372 | 24 |
| H(294) | 3729 | 6883 | -1500 | 24 |
| H(296) | 3706 | 4948 | 939   | 24 |
| H(297) | 3545 | 4655 | 1822  | 24 |
| H(298) | 4093 | 4932 | 2546  | 24 |
| H(299) | 4826 | 5433 | 2367  | 24 |
| H(300) | 5024 | 5724 | 1459  | 24 |
| H(302) | 5192 | 7783 | 1155  | 24 |
| H(303) | 4808 | 8328 | 1804  | 24 |
| H(304) | 4332 | 7960 | 2521  | 24 |
| H(305) | 4149 | 7040 | 2499  | 24 |
| H(306) | 4482 | 6507 | 1801  | 24 |
| H(308) | 5867 | 6862 | -1309 | 24 |
| H(309) | 6260 | 6403 | -2021 | 24 |
| H(310) | 5769 | 5902 | -2641 | 24 |
| H(311) | 4858 | 5853 | -2545 | 24 |
| H(312) | 4439 | 6389 | -1901 | 24 |
| H(313) | 3638 | 6029 | 785   | 24 |
| H(314) | 2923 | 6229 | 1349  | 24 |
| H(315) | 2703 | 7108 | 1509  | 24 |
| H(316) | 3190 | 7771 | 1052  | 24 |
| H(319) | 3751 | 8327 | 839   | 24 |
| H(320) | 4343 | 8950 | 453   | 24 |
| H(321) | 5020 | 8623 | -93   | 24 |
| H(322) | 5107 | 7731 | -209  | 24 |
| H(323) | 5859 | 6974 | 108   | 24 |
| H(324) | 6733 | 6920 | -90   | 24 |
| H(325) | 7001 | 6252 | -702  | 24 |

|        |       |       |       |    |
|--------|-------|-------|-------|----|
| H(326) | 6404  | 5618  | -1001 | 24 |
| H(329) | 5831  | 5005  | -1124 | 24 |
| H(330) | 5177  | 4414  | -1393 | 24 |
| H(331) | 4291  | 4699  | -1288 | 24 |
| H(332) | 4122  | 5498  | -881  | 24 |
| H(334) | -4653 | -1854 | -1005 | 24 |
| H(335) | -4911 | -2016 | -1918 | 24 |
| H(336) | -4541 | -1506 | -2636 | 24 |
| H(337) | -4025 | -782  | -2402 | 24 |
| H(338) | -3793 | -606  | -1506 | 24 |
| H(340) | -3760 | -2594 | 1087  | 24 |
| H(341) | -3780 | -2867 | 1976  | 24 |
| H(342) | -3129 | -2581 | 2619  | 24 |
| H(343) | -2482 | -1960 | 2303  | 24 |
| H(344) | -2478 | -1724 | 1402  | 24 |
| H(346) | -2339 | 292   | 1250  | 24 |
| H(347) | -2724 | 797   | 1955  | 24 |
| H(348) | -3320 | 369   | 2543  | 24 |
| H(349) | -3601 | -455  | 2372  | 24 |
| H(350) | -3263 | -972  | 1645  | 24 |
| H(352) | -1727 | -382  | -1371 | 24 |
| H(353) | -1193 | -902  | -1930 | 24 |
| H(354) | -1535 | -1637 | -2377 | 24 |
| H(355) | -2424 | -1823 | -2336 | 24 |
| H(356) | -2982 | -1290 | -1795 | 24 |
| H(357) | -3928 | -1486 | 781   | 24 |
| H(358) | -4632 | -1288 | 1370  | 24 |
| H(359) | -4856 | -407  | 1501  | 24 |
| H(360) | -4411 | 249   | 1058  | 24 |
| H(363) | -3804 | 818   | 892   | 24 |
| H(364) | -3237 | 1440  | 497   | 24 |
| H(365) | -2540 | 1119  | -34   | 24 |
| H(366) | -2484 | 228   | -193  | 24 |
| H(367) | -1723 | -544  | 141   | 24 |
| H(368) | -826  | -628  | -25   | 24 |
| H(369) | -571  | -1320 | -619  | 24 |

|        |       |       |       |    |
|--------|-------|-------|-------|----|
| H(370) | -1170 | -1941 | -934  | 24 |
| H(373) | -1749 | -2481 | -1201 | 24 |
| H(374) | -2446 | -3046 | -1482 | 24 |
| H(375) | -3286 | -2769 | -1350 | 24 |
| H(376) | -3465 | -1997 | -911  | 24 |

---

**Table S7.** Torsion angles [°] for **1**.

|                         |            |                         |            |
|-------------------------|------------|-------------------------|------------|
| Th(1)-S(1)-C(1)-C(2)    | 120.8(11)  | C(19)-C(20)-C(21)-C(22) | 3(3)       |
| Th(1)-S(1)-C(1)-C(6)    | -66.3(11)  | C(20)-C(21)-C(22)-C(23) | -5(3)      |
| C(6)-C(1)-C(2)-C(3)     | 1(3)       | C(21)-C(22)-C(23)-C(24) | 7(3)       |
| S(1)-C(1)-C(2)-C(3)     | 174.0(16)  | C(22)-C(23)-C(24)-C(19) | -7(3)      |
| C(1)-C(2)-C(3)-C(4)     | 2(3)       | C(20)-C(19)-C(24)-C(23) | 6(2)       |
| C(2)-C(3)-C(4)-C(5)     | -6(3)      | S(4)-C(19)-C(24)-C(23)  | 179.2(14)  |
| C(3)-C(4)-C(5)-C(6)     | 8(3)       | C(29)-N(1)-C(25)-C(26)  | 1(2)       |
| C(2)-C(1)-C(6)-C(5)     | 1(2)       | Th(1)-N(1)-C(25)-C(26)  | -171.3(16) |
| S(1)-C(1)-C(6)-C(5)     | -172.2(13) | N(1)-C(25)-C(26)-C(27)  | 4(3)       |
| C(4)-C(5)-C(6)-C(1)     | -5(3)      | C(25)-C(26)-C(27)-C(28) | -4(3)      |
| Th(1)-S(2)-C(7)-C(12)   | -66.0(12)  | C(26)-C(27)-C(28)-C(29) | 1(3)       |
| Th(1)-S(2)-C(7)-C(8)    | 118.8(10)  | C(25)-N(1)-C(29)-C(28)  | -5(2)      |
| C(12)-C(7)-C(8)-C(9)    | 1(2)       | Th(1)-N(1)-C(29)-C(28)  | 167.5(13)  |
| S(2)-C(7)-C(8)-C(9)     | 176.2(13)  | C(25)-N(1)-C(29)-C(30)  | 178.1(13)  |
| C(7)-C(8)-C(9)-C(10)    | 0(3)       | Th(1)-N(1)-C(29)-C(30)  | -9.7(15)   |
| C(8)-C(9)-C(10)-C(11)   | 0(3)       | C(27)-C(28)-C(29)-N(1)  | 4(3)       |
| C(9)-C(10)-C(11)-C(12)  | -1(3)      | C(27)-C(28)-C(29)-C(30) | -179.2(16) |
| C(10)-C(11)-C(12)-C(7)  | 2(3)       | C(34)-N(2)-C(30)-C(31)  | 4(2)       |
| C(8)-C(7)-C(12)-C(11)   | -2(3)      | Th(1)-N(2)-C(30)-C(31)  | 176.4(12)  |
| S(2)-C(7)-C(12)-C(11)   | -176.6(15) | C(34)-N(2)-C(30)-C(29)  | -171.5(13) |
| Th(1)-S(3)-C(13)-C(14)  | -98.6(12)  | Th(1)-N(2)-C(30)-C(29)  | 1.3(15)    |
| Th(1)-S(3)-C(13)-C(18)  | 86.1(10)   | N(1)-C(29)-C(30)-N(2)   | 5.3(18)    |
| C(18)-C(13)-C(14)-C(15) | 1(3)       | C(28)-C(29)-C(30)-N(2)  | -172.0(15) |
| S(3)-C(13)-C(14)-C(15)  | -174.3(16) | N(1)-C(29)-C(30)-C(31)  | -169.7(16) |
| C(13)-C(14)-C(15)-C(16) | 0(3)       | C(28)-C(29)-C(30)-C(31) | 13(2)      |
| C(14)-C(15)-C(16)-C(17) | 0(4)       | N(2)-C(30)-C(31)-C(32)  | 1(3)       |
| C(15)-C(16)-C(17)-C(18) | -3(3)      | C(29)-C(30)-C(31)-C(32) | 175.6(17)  |
| C(16)-C(17)-C(18)-C(13) | 4(3)       | C(30)-C(31)-C(32)-C(33) | -4(3)      |
| C(14)-C(13)-C(18)-C(17) | -3(2)      | C(31)-C(32)-C(33)-C(34) | 3(3)       |
| S(3)-C(13)-C(18)-C(17)  | 172.2(14)  | C(30)-N(2)-C(34)-C(33)  | -5(2)      |
| Th(1)-S(4)-C(19)-C(20)  | -109.7(10) | Th(1)-N(2)-C(34)-C(33)  | -178.0(15) |
| Th(1)-S(4)-C(19)-C(24)  | 76.6(11)   | C(32)-C(33)-C(34)-N(2)  | 2(3)       |
| C(24)-C(19)-C(20)-C(21) | -4(2)      | C(39)-N(3)-C(35)-C(36)  | -4(2)      |
| S(4)-C(19)-C(20)-C(21)  | -177.4(14) | Th(1)-N(3)-C(35)-C(36)  | -175.2(14) |

|                         |            |                         |            |
|-------------------------|------------|-------------------------|------------|
| N(3)-C(35)-C(36)-C(37)  | 1(3)       | C(56)-C(51)-C(52)-C(53) | 1(2)       |
| C(35)-C(36)-C(37)-C(38) | 1(3)       | S(6)-C(51)-C(52)-C(53)  | 176.2(15)  |
| C(36)-C(37)-C(38)-C(39) | 0(3)       | C(51)-C(52)-C(53)-C(54) | -2(3)      |
| C(35)-N(3)-C(39)-C(38)  | 5(2)       | C(52)-C(53)-C(54)-C(55) | 2(4)       |
| Th(1)-N(3)-C(39)-C(38)  | 176.2(12)  | C(53)-C(54)-C(55)-C(56) | -2(3)      |
| C(35)-N(3)-C(39)-C(40)  | -174.5(13) | C(52)-C(51)-C(56)-C(55) | -2(2)      |
| Th(1)-N(3)-C(39)-C(40)  | -3.0(16)   | S(6)-C(51)-C(56)-C(55)  | -176.2(15) |
| C(37)-C(38)-C(39)-N(3)  | -3(3)      | C(54)-C(55)-C(56)-C(51) | 2(3)       |
| C(37)-C(38)-C(39)-C(40) | 176.1(17)  | Th(2)-S(7)-C(57)-C(62)  | 82.7(11)   |
| C(44)-N(4)-C(40)-C(41)  | -1(2)      | Th(2)-S(7)-C(57)-C(58)  | -104.0(10) |
| Th(1)-N(4)-C(40)-C(41)  | 170.5(12)  | C(62)-C(57)-C(58)-C(59) | -2(2)      |
| C(44)-N(4)-C(40)-C(39)  | 177.8(13)  | S(7)-C(57)-C(58)-C(59)  | -175.2(14) |
| Th(1)-N(4)-C(40)-C(39)  | -10.3(17)  | C(57)-C(58)-C(59)-C(60) | 2(3)       |
| N(3)-C(39)-C(40)-N(4)   | 9(2)       | C(58)-C(59)-C(60)-C(61) | 0(3)       |
| C(38)-C(39)-C(40)-N(4)  | -170.6(16) | C(59)-C(60)-C(61)-C(62) | -2(3)      |
| N(3)-C(39)-C(40)-C(41)  | -172.2(15) | C(60)-C(61)-C(62)-C(57) | 2(3)       |
| C(38)-C(39)-C(40)-C(41) | 9(2)       | C(58)-C(57)-C(62)-C(61) | 0(2)       |
| N(4)-C(40)-C(41)-C(42)  | 1(3)       | S(7)-C(57)-C(62)-C(61)  | 173.3(15)  |
| C(39)-C(40)-C(41)-C(42) | -177.8(17) | Th(2)-S(8)-C(63)-C(68)  | 79.4(11)   |
| C(40)-C(41)-C(42)-C(43) | 0(3)       | Th(2)-S(8)-C(63)-C(64)  | -104.2(10) |
| C(41)-C(42)-C(43)-C(44) | -1(3)      | C(68)-C(63)-C(64)-C(65) | -3(2)      |
| C(40)-N(4)-C(44)-C(43)  | 0(2)       | S(8)-C(63)-C(64)-C(65)  | -179.9(14) |
| Th(1)-N(4)-C(44)-C(43)  | -172.3(15) | C(63)-C(64)-C(65)-C(66) | 2(3)       |
| C(42)-C(43)-C(44)-N(4)  | 1(3)       | C(64)-C(65)-C(66)-C(67) | -3(3)      |
| Th(2)-S(5)-C(45)-C(50)  | -69.8(11)  | C(65)-C(66)-C(67)-C(68) | 4(3)       |
| Th(2)-S(5)-C(45)-C(46)  | 118.4(10)  | C(66)-C(67)-C(68)-C(63) | -6(3)      |
| C(50)-C(45)-C(46)-C(47) | 2(2)       | C(64)-C(63)-C(68)-C(67) | 5(2)       |
| S(5)-C(45)-C(46)-C(47)  | 174.2(14)  | S(8)-C(63)-C(68)-C(67)  | -178.7(14) |
| C(45)-C(46)-C(47)-C(48) | 0(3)       | C(73)-N(5)-C(69)-C(70)  | -1(2)      |
| C(46)-C(47)-C(48)-C(49) | -3(3)      | Th(2)-N(5)-C(69)-C(70)  | -172.6(16) |
| C(47)-C(48)-C(49)-C(50) | 4(3)       | N(5)-C(69)-C(70)-C(71)  | 3(3)       |
| C(48)-C(49)-C(50)-C(45) | -2(3)      | C(69)-C(70)-C(71)-C(72) | -3(3)      |
| C(46)-C(45)-C(50)-C(49) | -1(2)      | C(70)-C(71)-C(72)-C(73) | 1(3)       |
| S(5)-C(45)-C(50)-C(49)  | -173.0(14) | C(69)-N(5)-C(73)-C(72)  | -1(2)      |
| Th(2)-S(6)-C(51)-C(56)  | -65.7(12)  | Th(2)-N(5)-C(73)-C(72)  | 170.0(13)  |
| Th(2)-S(6)-C(51)-C(52)  | 119.6(10)  | C(69)-N(5)-C(73)-C(74)  | 178.1(13)  |

|                         |            |                             |            |
|-------------------------|------------|-----------------------------|------------|
| Th(2)-N(5)-C(73)-C(74)  | -10.5(16)  | N(7)-C(83)-C(84)-C(85)      | -174.2(15) |
| C(71)-C(72)-C(73)-N(5)  | 1(3)       | N(8)-C(84)-C(85)-C(86)      | 2(3)       |
| C(71)-C(72)-C(73)-C(74) | -178.2(18) | C(83)-C(84)-C(85)-C(86)     | -175.7(18) |
| C(78)-N(6)-C(74)-C(75)  | 4(2)       | C(84)-C(85)-C(86)-C(87)     | 1(3)       |
| Th(2)-N(6)-C(74)-C(75)  | 175.5(13)  | C(85)-C(86)-C(87)-C(88)     | -4(3)      |
| C(78)-N(6)-C(74)-C(73)  | -173.4(14) | C(84)-N(8)-C(88)-C(87)      | -3(2)      |
| Th(2)-N(6)-C(74)-C(73)  | -2.1(17)   | Th(2)-N(8)-C(88)-C(87)      | -174.5(14) |
| N(5)-C(73)-C(74)-N(6)   | 8.0(19)    | C(86)-C(87)-C(88)-N(8)      | 6(3)       |
| C(72)-C(73)-C(74)-N(6)  | -172.5(17) | Th(3)-S(9)-C(89)-C(94)      | 65.1(13)   |
| N(5)-C(73)-C(74)-C(75)  | -169.6(16) | Th(3)-S(9)-C(89)-C(90)      | -117.9(11) |
| C(72)-C(73)-C(74)-C(75) | 10(3)      | C(94)-C(89)-C(90)-C(91)     | 1(3)       |
| N(6)-C(74)-C(75)-C(76)  | -2(3)      | S(9)-C(89)-C(90)-C(91)      | -175.9(17) |
| C(73)-C(74)-C(75)-C(76) | 175.6(17)  | C(89)-C(90)-C(91)-C(92)     | -3(3)      |
| C(74)-C(75)-C(76)-C(77) | 0(3)       | C(90)-C(91)-C(92)-C(93)     | 2(4)       |
| C(75)-C(76)-C(77)-C(78) | 0(3)       | C(91)-C(92)-C(93)-C(94)     | 0(4)       |
| C(76)-C(77)-C(78)-N(6)  | 2(3)       | C(92)-C(93)-C(94)-C(89)     | -2(3)      |
| C(74)-N(6)-C(78)-C(77)  | -4(2)      | C(90)-C(89)-C(94)-C(93)     | 2(3)       |
| Th(2)-N(6)-C(78)-C(77)  | -175.8(16) | S(9)-C(89)-C(94)-C(93)      | 178.7(16)  |
| C(83)-N(7)-C(79)-C(80)  | -1(3)      | Th(3)-S(10)-C(95)-C(96)     | -116.9(12) |
| Th(2)-N(7)-C(79)-C(80)  | -177.1(16) | Th(3)-S(10)-C(95)-C(100)    | 63.6(11)   |
| N(7)-C(79)-C(80)-C(81)  | -1(3)      | C(100)-C(95)-C(96)-C(97)    | 4(3)       |
| C(79)-C(80)-C(81)-C(82) | 1(3)       | S(10)-C(95)-C(96)-C(97)     | -175.9(17) |
| C(80)-C(81)-C(82)-C(83) | 1(3)       | C(95)-C(96)-C(97)-C(98)     | -3(3)      |
| C(81)-C(82)-C(83)-N(7)  | -4(3)      | C(96)-C(97)-C(98)-C(99)     | 0(3)       |
| C(81)-C(82)-C(83)-C(84) | 175.6(18)  | C(97)-C(98)-C(99)-C(100)    | 1(3)       |
| C(79)-N(7)-C(83)-C(82)  | 4(2)       | C(98)-C(99)-C(100)-C(95)    | 0(3)       |
| Th(2)-N(7)-C(83)-C(82)  | 179.4(12)  | C(96)-C(95)-C(100)-C(99)    | -2(2)      |
| C(79)-N(7)-C(83)-C(84)  | -175.7(14) | S(10)-C(95)-C(100)-C(99)    | 177.6(13)  |
| Th(2)-N(7)-C(83)-C(84)  | -0.2(17)   | Th(3)-S(11)-C(101)-C(102)   | 102.3(11)  |
| C(88)-N(8)-C(84)-C(85)  | -1(2)      | Th(3)-S(11)-C(101)-C(106)   | -78.0(11)  |
| Th(2)-N(8)-C(84)-C(85)  | 170.0(13)  | C(106)-C(101)-C(102)-C(103) | -2(3)      |
| C(88)-N(8)-C(84)-C(83)  | 177.0(13)  | S(11)-C(101)-C(102)-C(103)  | 177.4(16)  |
| Th(2)-N(8)-C(84)-C(83)  | -12.3(16)  | C(101)-C(102)-C(103)-C(104) | 3(3)       |
| C(82)-C(83)-C(84)-N(8)  | -171.6(17) | C(102)-C(103)-C(104)-C(105) | -1(3)      |
| N(7)-C(83)-C(84)-N(8)   | 8.0(19)    | C(103)-C(104)-C(105)-C(106) | -2(3)      |
| C(82)-C(83)-C(84)-C(85) | 6(3)       | C(104)-C(105)-C(106)-C(101) | 3(3)       |



|                             |            |                             |            |
|-----------------------------|------------|-----------------------------|------------|
| C(102)-C(101)-C(106)-C(105) | -1(2)      | Th(3)-N(10)-C(122)-C(121)   | -177.9(16) |
| S(11)-C(101)-C(106)-C(105)  | 179.6(14)  | C(120)-C(121)-C(122)-N(10)  | -1(3)      |
| Th(3)-S(12)-C(107)-C(112)   | -78.3(10)  | C(127)-N(11)-C(123)-C(124)  | -1(3)      |
| Th(3)-S(12)-C(107)-C(108)   | 101.2(11)  | Th(3)-N(11)-C(123)-C(124)   | 175.5(16)  |
| C(112)-C(107)-C(108)-C(109) | -1(2)      | N(11)-C(123)-C(124)-C(125)  | 2(3)       |
| S(12)-C(107)-C(108)-C(109)  | 179.5(14)  | C(123)-C(124)-C(125)-C(126) | -2(3)      |
| C(107)-C(108)-C(109)-C(110) | 1(3)       | C(124)-C(125)-C(126)-C(127) | 1(3)       |
| C(108)-C(109)-C(110)-C(111) | -2(3)      | C(123)-N(11)-C(127)-C(126)  | 0(2)       |
| C(109)-C(110)-C(111)-C(112) | 4(3)       | Th(3)-N(11)-C(127)-C(126)   | -176.8(13) |
| C(108)-C(107)-C(112)-C(111) | 3(2)       | C(123)-N(11)-C(127)-C(128)  | 175.8(14)  |
| S(12)-C(107)-C(112)-C(111)  | -177.6(14) | Th(3)-N(11)-C(127)-C(128)   | -1.1(17)   |
| C(110)-C(111)-C(112)-C(107) | -5(3)      | C(125)-C(126)-C(127)-N(11)  | 0(3)       |
| C(117)-N(9)-C(113)-C(114)   | 2(2)       | C(125)-C(126)-C(127)-C(128) | -175.4(18) |
| Th(3)-N(9)-C(113)-C(114)    | 173.1(14)  | C(132)-N(12)-C(128)-C(129)  | 0(2)       |
| N(9)-C(113)-C(114)-C(115)   | -2(3)      | Th(3)-N(12)-C(128)-C(129)   | -171.9(12) |
| C(113)-C(114)-C(115)-C(116) | 1(3)       | C(132)-N(12)-C(128)-C(127)  | -176.8(13) |
| C(114)-C(115)-C(116)-C(117) | -1(3)      | Th(3)-N(12)-C(128)-C(127)   | 11.2(15)   |
| C(115)-C(116)-C(117)-N(9)   | 2(3)       | N(11)-C(127)-C(128)-C(129)  | 177.0(16)  |
| C(115)-C(116)-C(117)-C(118) | 176.3(18)  | C(126)-C(127)-C(128)-C(129) | -7(3)      |
| C(113)-N(9)-C(117)-C(116)   | -2(2)      | N(11)-C(127)-C(128)-N(12)   | -6.3(19)   |
| Th(3)-N(9)-C(117)-C(116)    | -172.6(14) | C(126)-C(127)-C(128)-N(12)  | 169.6(16)  |
| C(113)-N(9)-C(117)-C(118)   | -177.1(13) | N(12)-C(128)-C(129)-C(130)  | -1(3)      |
| Th(3)-N(9)-C(117)-C(118)    | 12.5(16)   | C(127)-C(128)-C(129)-C(130) | 175.1(18)  |
| C(122)-N(10)-C(118)-C(119)  | -2(2)      | C(128)-C(129)-C(130)-C(131) | 2(3)       |
| Th(3)-N(10)-C(118)-C(119)   | 178.2(14)  | C(129)-C(130)-C(131)-C(132) | -1(3)      |
| C(122)-N(10)-C(118)-C(117)  | 177.0(14)  | C(128)-N(12)-C(132)-C(131)  | 1(2)       |
| Th(3)-N(10)-C(118)-C(117)   | -3.1(17)   | Th(3)-N(12)-C(132)-C(131)   | 173.2(15)  |
| C(116)-C(117)-C(118)-N(10)  | 179.3(16)  | C(130)-C(131)-C(132)-N(12)  | -1(3)      |
| N(9)-C(117)-C(118)-N(10)    | -5.9(19)   | Th(4)-S(13)-C(133)-C(138)   | 62.9(12)   |
| C(116)-C(117)-C(118)-C(119) | -2(3)      | Th(4)-S(13)-C(133)-C(134)   | -122.1(10) |
| N(9)-C(117)-C(118)-C(119)   | 172.9(16)  | C(138)-C(133)-C(134)-C(135) | 0(2)       |
| N(10)-C(118)-C(119)-C(120)  | 1(3)       | S(13)-C(133)-C(134)-C(135)  | -175.2(14) |
| C(117)-C(118)-C(119)-C(120) | -177.8(17) | C(133)-C(134)-C(135)-C(136) | 2(3)       |
| C(118)-C(119)-C(120)-C(121) | 0(3)       | C(134)-C(135)-C(136)-C(137) | -4(3)      |
| C(119)-C(120)-C(121)-C(122) | 0(3)       | C(135)-C(136)-C(137)-C(138) | 4(3)       |
| C(118)-N(10)-C(122)-C(121)  | 2(2)       | C(134)-C(133)-C(138)-C(137) | 0(3)       |

|                             |            |                             |            |
|-----------------------------|------------|-----------------------------|------------|
| S(13)-C(133)-C(138)-C(137)  | 174.7(15)  | C(158)-C(159)-C(160)-C(161) | 2(3)       |
| C(136)-C(137)-C(138)-C(133) | -2(3)      | C(157)-N(13)-C(161)-C(160)  | 1.5(19)    |
| Th(4)-S(14)-C(139)-C(144)   | 70.3(12)   | Th(4)-N(13)-C(161)-C(160)   | -172.0(12) |
| Th(4)-S(14)-C(139)-C(140)   | -117.8(10) | C(157)-N(13)-C(161)-C(162)  | -173.3(13) |
| C(144)-C(139)-C(140)-C(141) | -2(2)      | Th(4)-N(13)-C(161)-C(162)   | 13.2(15)   |
| S(14)-C(139)-C(140)-C(141)  | -175.0(15) | C(159)-C(160)-C(161)-N(13)  | -2(3)      |
| C(139)-C(140)-C(141)-C(142) | 1(3)       | C(159)-C(160)-C(161)-C(162) | 172.3(17)  |
| C(140)-C(141)-C(142)-C(143) | 1(3)       | C(166)-N(14)-C(162)-C(163)  | -5(2)      |
| C(141)-C(142)-C(143)-C(144) | -2(3)      | Th(4)-N(14)-C(162)-C(163)   | -177.9(12) |
| C(142)-C(143)-C(144)-C(139) | 1(3)       | C(166)-N(14)-C(162)-C(161)  | 175.6(14)  |
| C(140)-C(139)-C(144)-C(143) | 1(3)       | Th(4)-N(14)-C(162)-C(161)   | 2.6(17)    |
| S(14)-C(139)-C(144)-C(143)  | 173.6(15)  | N(13)-C(161)-C(162)-N(14)   | -10.0(19)  |
| Th(4)-S(15)-C(145)-C(146)   | 102.8(11)  | C(160)-C(161)-C(162)-N(14)  | 175.2(15)  |
| Th(4)-S(15)-C(145)-C(150)   | -79.0(10)  | N(13)-C(161)-C(162)-C(163)  | 170.5(16)  |
| C(150)-C(145)-C(146)-C(147) | -1(3)      | C(160)-C(161)-C(162)-C(163) | -4(3)      |
| S(15)-C(145)-C(146)-C(147)  | 177.7(15)  | N(14)-C(162)-C(163)-C(164)  | 4(3)       |
| C(145)-C(146)-C(147)-C(148) | 2(3)       | C(161)-C(162)-C(163)-C(164) | -176.5(17) |
| C(146)-C(147)-C(148)-C(149) | -3(3)      | C(162)-C(163)-C(164)-C(165) | 0(3)       |
| C(147)-C(148)-C(149)-C(150) | 2(4)       | C(163)-C(164)-C(165)-C(166) | -3(3)      |
| C(146)-C(145)-C(150)-C(149) | 0(2)       | C(162)-N(14)-C(166)-C(165)  | 2(3)       |
| S(15)-C(145)-C(150)-C(149)  | -178.2(13) | Th(4)-N(14)-C(166)-C(165)   | 174.8(16)  |
| C(148)-C(149)-C(150)-C(145) | -1(3)      | C(164)-C(165)-C(166)-N(14)  | 3(3)       |
| Th(4)-S(16)-C(151)-C(156)   | -82.1(10)  | C(171)-N(15)-C(167)-C(168)  | 1(3)       |
| Th(4)-S(16)-C(151)-C(152)   | 97.5(10)   | Th(4)-N(15)-C(167)-C(168)   | 179.7(16)  |
| C(156)-C(151)-C(152)-C(153) | 1(2)       | N(15)-C(167)-C(168)-C(169)  | -1(3)      |
| S(16)-C(151)-C(152)-C(153)  | -178.3(14) | C(167)-C(168)-C(169)-C(170) | -1(3)      |
| C(151)-C(152)-C(153)-C(154) | -1(3)      | C(168)-C(169)-C(170)-C(171) | 3(3)       |
| C(152)-C(153)-C(154)-C(155) | 1(3)       | C(167)-N(15)-C(171)-C(170)  | 0.8(19)    |
| C(153)-C(154)-C(155)-C(156) | -1(3)      | Th(4)-N(15)-C(171)-C(170)   | -178.1(11) |
| C(152)-C(151)-C(156)-C(155) | -2(2)      | C(167)-N(15)-C(171)-C(172)  | 172.4(14)  |
| S(16)-C(151)-C(156)-C(155)  | 177.7(13)  | Th(4)-N(15)-C(171)-C(172)   | -6.5(15)   |
| C(154)-C(155)-C(156)-C(151) | 2(3)       | C(169)-C(170)-C(171)-N(15)  | -2(2)      |
| C(161)-N(13)-C(157)-C(158)  | -1(2)      | C(169)-C(170)-C(171)-C(172) | -173.6(18) |
| Th(4)-N(13)-C(157)-C(158)   | 172.7(15)  | C(176)-N(16)-C(172)-C(173)  | 3(2)       |
| N(13)-C(157)-C(158)-C(159)  | 1(3)       | Th(4)-N(16)-C(172)-C(173)   | -173.0(12) |
| C(157)-C(158)-C(159)-C(160) | -2(3)      | C(176)-N(16)-C(172)-C(171)  | -177.5(14) |

|                             |           |                             |        |
|-----------------------------|-----------|-----------------------------|--------|
| Th(4)-N(16)-C(172)-C(171)   | 6.1(17)   | C(213)-C(214)-C(215)-C(216) | -2.8   |
| N(15)-C(171)-C(172)-N(16)   | 0.3(19)   | C(214)-C(215)-C(216)-C(217) | 2.7    |
| C(170)-C(171)-C(172)-N(16)  | 171.7(15) | C(215)-C(216)-C(217)-C(218) | -3.4   |
| N(15)-C(171)-C(172)-C(173)  | 179.4(15) | C(216)-C(217)-C(218)-C(213) | 4.1    |
| C(170)-C(171)-C(172)-C(173) | -9(2)     | C(214)-C(213)-C(218)-C(217) | -4.0   |
| N(16)-C(172)-C(173)-C(174)  | -2(3)     | S(3B)-C(213)-C(218)-C(217)  | 178.7  |
| C(171)-C(172)-C(173)-C(174) | 178.6(17) | Th(1B)-S(4B)-C(219)-C(220)  | 107.4  |
| C(172)-C(173)-C(174)-C(175) | 0(3)      | Th(1B)-S(4B)-C(219)-C(224)  | -77.7  |
| C(173)-C(174)-C(175)-C(176) | 1(3)      | C(224)-C(219)-C(220)-C(221) | 4.7    |
| C(172)-N(16)-C(176)-C(175)  | -2(2)     | S(4B)-C(219)-C(220)-C(221)  | 179.7  |
| Th(4)-N(16)-C(176)-C(175)   | 174.1(15) | C(219)-C(220)-C(221)-C(222) | -4.3   |
| C(174)-C(175)-C(176)-N(16)  | 0(3)      | C(220)-C(221)-C(222)-C(223) | 5.1    |
| Th(1B)-S(1B)-C(201)-C(202)  | -131.5    | C(221)-C(222)-C(223)-C(224) | -6.4   |
| Th(1B)-S(1B)-C(201)-C(206)  | 56.2      | C(222)-C(223)-C(224)-C(219) | 6.9    |
| C(206)-C(201)-C(202)-C(203) | 2.7       | C(220)-C(219)-C(224)-C(223) | -6.2   |
| S(1B)-C(201)-C(202)-C(203)  | -170.0    | S(4B)-C(219)-C(224)-C(223)  | 178.9  |
| C(201)-C(202)-C(203)-C(204) | -4.0      | C(229)-N(1B)-C(225)-C(226)  | -3.1   |
| C(202)-C(203)-C(204)-C(205) | 6.7       | Th(1B)-N(1B)-C(225)-C(226)  | 169.8  |
| C(203)-C(204)-C(205)-C(206) | -8.1      | N(1B)-C(225)-C(226)-C(227)  | 5.2    |
| C(202)-C(201)-C(206)-C(205) | -3.7      | C(225)-C(226)-C(227)-C(228) | -1.8   |
| S(1B)-C(201)-C(206)-C(205)  | 168.6     | C(226)-C(227)-C(228)-C(229) | -3.2   |
| C(204)-C(205)-C(206)-C(201) | 6.6       | C(225)-N(1B)-C(229)-C(228)  | -2.4   |
| Th(1B)-S(2B)-C(207)-C(212)  | 58.7      | Th(1B)-N(1B)-C(229)-C(228)  | -175.1 |
| Th(1B)-S(2B)-C(207)-C(208)  | -125.7    | C(225)-N(1B)-C(229)-C(230)  | -177.2 |
| C(212)-C(207)-C(208)-C(209) | 0.5       | Th(1B)-N(1B)-C(229)-C(230)  | 10.2   |
| S(2B)-C(207)-C(208)-C(209)  | -175.4    | C(227)-C(228)-C(229)-N(1B)  | 5.4    |
| C(207)-C(208)-C(209)-C(210) | 2.4       | C(227)-C(228)-C(229)-C(230) | -179.9 |
| C(208)-C(209)-C(210)-C(211) | -4.0      | C(234)-N(2B)-C(230)-C(231)  | 2.3    |
| C(209)-C(210)-C(211)-C(212) | 2.7       | Th(1B)-N(2B)-C(230)-C(231)  | -171.4 |
| C(210)-C(211)-C(212)-C(207) | 0.2       | C(234)-N(2B)-C(230)-C(229)  | 176.4  |
| C(208)-C(207)-C(212)-C(211) | -1.7      | Th(1B)-N(2B)-C(230)-C(229)  | 2.7    |
| S(2B)-C(207)-C(212)-C(211)  | 173.8     | N(1B)-C(229)-C(230)-N(2B)   | -8.2   |
| Th(1B)-S(3B)-C(213)-C(214)  | 92.5      | C(228)-C(229)-C(230)-N(2B)  | 176.8  |
| Th(1B)-S(3B)-C(213)-C(218)  | -90.4     | N(1B)-C(229)-C(230)-C(231)  | 165.8  |
| C(218)-C(213)-C(214)-C(215) | 3.3       | C(228)-C(229)-C(230)-C(231) | -9.2   |
| S(3B)-C(213)-C(214)-C(215)  | -179.5    | N(2B)-C(230)-C(231)-C(232)  | 1.9    |

|                             |        |                             |        |
|-----------------------------|--------|-----------------------------|--------|
| C(229)-C(230)-C(231)-C(232) | -171.6 | C(245)-C(246)-C(247)-C(248) | -2.3   |
| C(230)-C(231)-C(232)-C(233) | -4.2   | C(246)-C(247)-C(248)-C(249) | 3.3    |
| C(231)-C(232)-C(233)-C(234) | 2.2    | C(247)-C(248)-C(249)-C(250) | -1.0   |
| C(230)-N(2B)-C(234)-C(233)  | -4.5   | C(248)-C(249)-C(250)-C(245) | -2.3   |
| Th(1B)-N(2B)-C(234)-C(233)  | 169.5  | C(246)-C(245)-C(250)-C(249) | 3.1    |
| C(232)-C(233)-C(234)-N(2B)  | 2.3    | S(5B)-C(245)-C(250)-C(249)  | 175.0  |
| C(239)-N(3B)-C(235)-C(236)  | -0.3   | Th(2B)-S(6B)-C(251)-C(256)  | 52.9   |
| Th(1B)-N(3B)-C(235)-C(236)  | 171.4  | Th(2B)-S(6B)-C(251)-C(252)  | -121.5 |
| N(3B)-C(235)-C(236)-C(237)  | 4.1    | C(256)-C(251)-C(252)-C(253) | 2.1    |
| C(235)-C(236)-C(237)-C(238) | -3.5   | S(6B)-C(251)-C(252)-C(253)  | 176.7  |
| C(236)-C(237)-C(238)-C(239) | -0.5   | C(251)-C(252)-C(253)-C(254) | 0.8    |
| C(235)-N(3B)-C(239)-C(238)  | -3.8   | C(252)-C(253)-C(254)-C(255) | -2.5   |
| Th(1B)-N(3B)-C(239)-C(238)  | -175.4 | C(253)-C(254)-C(255)-C(256) | 1.4    |
| C(235)-N(3B)-C(239)-C(240)  | 174.9  | C(252)-C(251)-C(256)-C(255) | -3.2   |
| Th(1B)-N(3B)-C(239)-C(240)  | 3.3    | S(6B)-C(251)-C(256)-C(255)  | -177.5 |
| C(237)-C(238)-C(239)-N(3B)  | 4.2    | C(254)-C(255)-C(256)-C(251) | 1.5    |
| C(237)-C(238)-C(239)-C(240) | -174.4 | Th(2B)-S(7B)-C(257)-C(262)  | -83.8  |
| C(244)-N(4B)-C(240)-C(241)  | 1.4    | Th(2B)-S(7B)-C(257)-C(258)  | 103.0  |
| Th(1B)-N(4B)-C(240)-C(241)  | -170.3 | C(262)-C(257)-C(258)-C(259) | -2.3   |
| C(244)-N(4B)-C(240)-C(239)  | -178.1 | S(7B)-C(257)-C(258)-C(259)  | 171.1  |
| Th(1B)-N(4B)-C(240)-C(239)  | 10.2   | C(257)-C(258)-C(259)-C(260) | 0.1    |
| N(3B)-C(239)-C(240)-N(4B)   | -8.7   | C(258)-C(259)-C(260)-C(261) | 2.8    |
| C(238)-C(239)-C(240)-N(4B)  | 169.9  | C(259)-C(260)-C(261)-C(262) | -3.4   |
| N(3B)-C(239)-C(240)-C(241)  | 171.8  | C(260)-C(261)-C(262)-C(257) | 1.0    |
| C(238)-C(239)-C(240)-C(241) | -9.6   | C(258)-C(257)-C(262)-C(261) | 1.8    |
| N(4B)-C(240)-C(241)-C(242)  | 2.4    | S(7B)-C(257)-C(262)-C(261)  | -171.5 |
| C(239)-C(240)-C(241)-C(242) | -178.2 | Th(2B)-S(8B)-C(263)-C(268)  | -73.2  |
| C(240)-C(241)-C(242)-C(243) | -4.0   | Th(2B)-S(8B)-C(263)-C(264)  | 109.6  |
| C(241)-C(242)-C(243)-C(244) | 1.9    | C(268)-C(263)-C(264)-C(265) | 4.5    |
| C(240)-N(4B)-C(244)-C(243)  | -3.8   | S(8B)-C(263)-C(264)-C(265)  | -178.2 |
| Th(1B)-N(4B)-C(244)-C(243)  | 168.1  | C(263)-C(264)-C(265)-C(266) | -1.3   |
| C(242)-C(243)-C(244)-N(4B)  | 2.2    | C(264)-C(265)-C(266)-C(267) | -3.4   |
| Th(2B)-S(5B)-C(245)-C(250)  | 54.3   | C(265)-C(266)-C(267)-C(268) | 5.2    |
| Th(2B)-S(5B)-C(245)-C(246)  | -133.9 | C(266)-C(267)-C(268)-C(263) | -2.0   |
| C(250)-C(245)-C(246)-C(247) | -0.9   | C(264)-C(263)-C(268)-C(267) | -2.9   |
| S(5B)-C(245)-C(246)-C(247)  | -173.1 | S(8B)-C(263)-C(268)-C(267)  | 179.9  |

|                             |        |                             |        |
|-----------------------------|--------|-----------------------------|--------|
| C(273)-N(5B)-C(269)-C(270)  | 4.1    | Th(2B)-N(7B)-C(283)-C(284)  | 0.1    |
| Th(2B)-N(5B)-C(269)-C(270)  | 175.7  | C(288)-N(8B)-C(284)-C(285)  | 0.1    |
| N(5B)-C(269)-C(270)-C(271)  | -3.0   | Th(2B)-N(8B)-C(284)-C(285)  | -170.5 |
| C(269)-C(270)-C(271)-C(272) | -1.2   | C(288)-N(8B)-C(284)-C(283)  | -177.0 |
| C(270)-C(271)-C(272)-C(273) | 4.1    | Th(2B)-N(8B)-C(284)-C(283)  | 12.4   |
| C(269)-N(5B)-C(273)-C(272)  | -1.1   | C(282)-C(283)-C(284)-N(8B)  | 170.4  |
| Th(2B)-N(5B)-C(273)-C(272)  | -172.4 | N(7B)-C(283)-C(284)-N(8B)   | -8.0   |
| C(269)-N(5B)-C(273)-C(274)  | -178.3 | C(282)-C(283)-C(284)-C(285) | -6.7   |
| Th(2B)-N(5B)-C(273)-C(274)  | 10.4   | N(7B)-C(283)-C(284)-C(285)  | 174.9  |
| C(271)-C(272)-C(273)-N(5B)  | -2.9   | N(8B)-C(284)-C(285)-C(286)  | -1.2   |
| C(271)-C(272)-C(273)-C(274) | 174.0  | C(283)-C(284)-C(285)-C(286) | 175.8  |
| C(278)-N(6B)-C(274)-C(275)  | -4.3   | C(284)-C(285)-C(286)-C(287) | -1.4   |
| Th(2B)-N(6B)-C(274)-C(275)  | -175.7 | C(285)-C(286)-C(287)-C(288) | 4.8    |
| C(278)-N(6B)-C(274)-C(273)  | 173.5  | C(284)-N(8B)-C(288)-C(287)  | 3.9    |
| Th(2B)-N(6B)-C(274)-C(273)  | 2.1    | Th(2B)-N(8B)-C(288)-C(287)  | 174.7  |
| N(5B)-C(273)-C(274)-N(6B)   | -7.9   | C(286)-C(287)-C(288)-N(8B)  | -6.2   |
| C(272)-C(273)-C(274)-N(6B)  | 175.0  | Th(3B)-S(9B)-C(289)-C(294)  | -65.9  |
| N(5B)-C(273)-C(274)-C(275)  | 169.9  | Th(3B)-S(9B)-C(289)-C(290)  | 120.1  |
| C(272)-C(273)-C(274)-C(275) | -7.2   | C(294)-C(289)-C(290)-C(291) | -5.0   |
| N(6B)-C(274)-C(275)-C(276)  | -0.1   | S(9B)-C(289)-C(290)-C(291)  | 169.3  |
| C(273)-C(274)-C(275)-C(276) | -177.8 | C(289)-C(290)-C(291)-C(292) | 0.2    |
| C(274)-C(275)-C(276)-C(277) | 3.9    | C(290)-C(291)-C(292)-C(293) | 3.7    |
| C(275)-C(276)-C(277)-C(278) | -3.2   | C(291)-C(292)-C(293)-C(294) | -2.9   |
| C(276)-C(277)-C(278)-N(6B)  | -1.2   | C(292)-C(293)-C(294)-C(289) | -2.0   |
| C(274)-N(6B)-C(278)-C(277)  | 5.0    | C(290)-C(289)-C(294)-C(293) | 5.8    |
| Th(2B)-N(6B)-C(278)-C(277)  | 176.6  | S(9B)-C(289)-C(294)-C(293)  | -168.3 |
| C(283)-N(7B)-C(279)-C(280)  | 2.3    | Th(3B)-S(10B)-C(295)-C(296) | 120.1  |
| Th(2B)-N(7B)-C(279)-C(280)  | 177.9  | Th(3B)-S(10B)-C(295)-C(300) | -64.1  |
| N(7B)-C(279)-C(280)-C(281)  | -2.9   | C(300)-C(295)-C(296)-C(297) | -5.4   |
| C(279)-C(280)-C(281)-C(282) | 4.0    | S(10B)-C(295)-C(296)-C(297) | 170.5  |
| C(280)-C(281)-C(282)-C(283) | -4.9   | C(295)-C(296)-C(297)-C(298) | 4.3    |
| C(281)-C(282)-C(283)-N(7B)  | 4.6    | C(296)-C(297)-C(298)-C(299) | -2.0   |
| C(281)-C(282)-C(283)-C(284) | -173.7 | C(297)-C(298)-C(299)-C(300) | 1.2    |
| C(279)-N(7B)-C(283)-C(282)  | -3.0   | C(298)-C(299)-C(300)-C(295) | -2.2   |
| Th(2B)-N(7B)-C(283)-C(282)  | -178.4 | C(296)-C(295)-C(300)-C(299) | 4.1    |
| C(279)-N(7B)-C(283)-C(284)  | 175.4  | S(10B)-C(295)-C(300)-C(299) | -171.8 |

|                             |        |                             |        |
|-----------------------------|--------|-----------------------------|--------|
| Th(3B)-S(11B)-C(301)-C(302) | -96.0  | N(9B)-C(317)-C(318)-N(10B)  | 7.0    |
| Th(3B)-S(11B)-C(301)-C(306) | 86.1   | C(316)-C(317)-C(318)-C(319) | 4.8    |
| C(306)-C(301)-C(302)-C(303) | 1.1    | N(9B)-C(317)-C(318)-C(319)  | -169.5 |
| S(11B)-C(301)-C(302)-C(303) | -176.9 | N(10B)-C(318)-C(319)-C(320) | 3.6    |
| C(301)-C(302)-C(303)-C(304) | 3.2    | C(317)-C(318)-C(319)-C(320) | 180.0  |
| C(302)-C(303)-C(304)-C(305) | -4.7   | C(318)-C(319)-C(320)-C(321) | -2.3   |
| C(303)-C(304)-C(305)-C(306) | 2.0    | C(319)-C(320)-C(321)-C(322) | -1.1   |
| C(304)-C(305)-C(306)-C(301) | 2.3    | C(318)-N(10B)-C(322)-C(321) | -2.6   |
| C(302)-C(301)-C(306)-C(305) | -3.8   | Th(3B)-N(10B)-C(322)-C(321) | 177.9  |
| S(11B)-C(301)-C(306)-C(305) | 174.2  | C(320)-C(321)-C(322)-N(10B) | 3.8    |
| Th(3B)-S(12B)-C(307)-C(312) | 90.7   | C(327)-N(11B)-C(323)-C(324) | 0.9    |
| Th(3B)-S(12B)-C(307)-C(308) | -92.0  | Th(3B)-N(11B)-C(323)-C(324) | -177.8 |
| C(312)-C(307)-C(308)-C(309) | 0.9    | N(11B)-C(323)-C(324)-C(325) | 2.5    |
| S(12B)-C(307)-C(308)-C(309) | -176.5 | C(323)-C(324)-C(325)-C(326) | -3.8   |
| C(307)-C(308)-C(309)-C(310) | -2.6   | C(324)-C(325)-C(326)-C(327) | 1.9    |
| C(308)-C(309)-C(310)-C(311) | 0.1    | C(323)-N(11B)-C(327)-C(326) | -3.0   |
| C(309)-C(310)-C(311)-C(312) | 3.9    | Th(3B)-N(11B)-C(327)-C(326) | 175.7  |
| C(308)-C(307)-C(312)-C(311) | 3.1    | C(323)-N(11B)-C(327)-C(328) | -178.2 |
| S(12B)-C(307)-C(312)-C(311) | -179.4 | Th(3B)-N(11B)-C(327)-C(328) | 0.4    |
| C(310)-C(311)-C(312)-C(307) | -5.6   | C(325)-C(326)-C(327)-N(11B) | 1.7    |
| C(317)-N(9B)-C(313)-C(314)  | -4.4   | C(325)-C(326)-C(327)-C(328) | 176.8  |
| Th(3B)-N(9B)-C(313)-C(314)  | -175.0 | C(332)-N(12B)-C(328)-C(329) | -6.0   |
| N(9B)-C(313)-C(314)-C(315)  | 2.2    | Th(3B)-N(12B)-C(328)-C(329) | 164.6  |
| C(313)-C(314)-C(315)-C(316) | 1.9    | C(332)-N(12B)-C(328)-C(327) | 177.9  |
| C(314)-C(315)-C(316)-C(317) | -3.7   | Th(3B)-N(12B)-C(328)-C(327) | -11.5  |
| C(315)-C(316)-C(317)-N(9B)  | 1.6    | N(11B)-C(327)-C(328)-C(329) | -168.9 |
| C(315)-C(316)-C(317)-C(318) | -172.3 | C(326)-C(327)-C(328)-C(329) | 15.7   |
| C(313)-N(9B)-C(317)-C(316)  | 2.4    | N(11B)-C(327)-C(328)-N(12B) | 6.9    |
| Th(3B)-N(9B)-C(317)-C(316)  | 172.5  | C(326)-C(327)-C(328)-N(12B) | -168.4 |
| C(313)-N(9B)-C(317)-C(318)  | 176.8  | N(12B)-C(328)-C(329)-C(330) | 1.5    |
| Th(3B)-N(9B)-C(317)-C(318)  | -13.1  | C(327)-C(328)-C(329)-C(330) | 177.1  |
| C(322)-N(10B)-C(318)-C(319) | -1.2   | C(328)-C(329)-C(330)-C(331) | 2.9    |
| Th(3B)-N(10B)-C(318)-C(319) | 178.4  | C(329)-C(330)-C(331)-C(332) | -2.8   |
| C(322)-N(10B)-C(318)-C(317) | -177.7 | C(328)-N(12B)-C(332)-C(331) | 6.2    |
| Th(3B)-N(10B)-C(318)-C(317) | 1.9    | Th(3B)-N(12B)-C(332)-C(331) | -164.8 |
| C(316)-C(317)-C(318)-N(10B) | -178.7 | C(330)-C(331)-C(332)-N(12B) | -1.8   |

|                             |        |                             |        |
|-----------------------------|--------|-----------------------------|--------|
| Th(4B)-S(13B)-C(333)-C(338) | -55.4  | C(353)-C(354)-C(355)-C(356) | -2.0   |
| Th(4B)-S(13B)-C(333)-C(334) | 128.0  | C(352)-C(351)-C(356)-C(355) | 4.0    |
| C(338)-C(333)-C(334)-C(335) | 1.5    | S(16B)-C(351)-C(356)-C(355) | -172.5 |
| S(13B)-C(333)-C(334)-C(335) | 178.3  | C(354)-C(355)-C(356)-C(351) | -1.6   |
| C(333)-C(334)-C(335)-C(336) | 2.1    | C(361)-N(13B)-C(357)-C(358) | -2.6   |
| C(334)-C(335)-C(336)-C(337) | -4.6   | Th(4B)-N(13B)-C(357)-C(358) | -177.0 |
| C(335)-C(336)-C(337)-C(338) | 3.6    | N(13B)-C(357)-C(358)-C(359) | 2.9    |
| C(334)-C(333)-C(338)-C(337) | -2.7   | C(357)-C(358)-C(359)-C(360) | 0.4    |
| S(13B)-C(333)-C(338)-C(337) | -179.2 | C(358)-C(359)-C(360)-C(361) | -3.6   |
| C(336)-C(337)-C(338)-C(333) | 0.1    | C(357)-N(13B)-C(361)-C(360) | -0.7   |
| Th(4B)-S(14B)-C(339)-C(344) | -59.4  | Th(4B)-N(13B)-C(361)-C(360) | 173.5  |
| Th(4B)-S(14B)-C(339)-C(340) | 129.5  | C(357)-N(13B)-C(361)-C(362) | 172.8  |
| C(344)-C(339)-C(340)-C(341) | -4.2   | Th(4B)-N(13B)-C(361)-C(362) | -12.9  |
| S(14B)-C(339)-C(340)-C(341) | 167.8  | C(359)-C(360)-C(361)-N(13B) | 3.9    |
| C(339)-C(340)-C(341)-C(342) | 1.6    | C(359)-C(360)-C(361)-C(362) | -169.3 |
| C(340)-C(341)-C(342)-C(343) | 2.0    | C(366)-N(14B)-C(362)-C(363) | 1.8    |
| C(341)-C(342)-C(343)-C(344) | -2.9   | Th(4B)-N(14B)-C(362)-C(363) | 174.9  |
| C(342)-C(343)-C(344)-C(339) | 0.1    | C(366)-N(14B)-C(362)-C(361) | -176.7 |
| C(340)-C(339)-C(344)-C(343) | 3.3    | Th(4B)-N(14B)-C(362)-C(361) | -3.6   |
| S(14B)-C(339)-C(344)-C(343) | -168.1 | N(13B)-C(361)-C(362)-N(14B) | 10.5   |
| Th(4B)-S(15B)-C(345)-C(346) | -109.2 | C(360)-C(361)-C(362)-N(14B) | -176.0 |
| Th(4B)-S(15B)-C(345)-C(350) | 75.9   | N(13B)-C(361)-C(362)-C(363) | -168.0 |
| C(350)-C(345)-C(346)-C(347) | 3.7    | C(360)-C(361)-C(362)-C(363) | 5.5    |
| S(15B)-C(345)-C(346)-C(347) | -171.3 | N(14B)-C(362)-C(363)-C(364) | 3.4    |
| C(345)-C(346)-C(347)-C(348) | 1.2    | C(361)-C(362)-C(363)-C(364) | -178.2 |
| C(346)-C(347)-C(348)-C(349) | -4.7   | C(362)-C(363)-C(364)-C(365) | -5.5   |
| C(347)-C(348)-C(349)-C(350) | 3.1    | C(363)-C(364)-C(365)-C(366) | 2.6    |
| C(346)-C(345)-C(350)-C(349) | -5.3   | C(362)-N(14B)-C(366)-C(365) | -5.0   |
| S(15B)-C(345)-C(350)-C(349) | 169.7  | Th(4B)-N(14B)-C(366)-C(365) | -178.3 |
| C(348)-C(349)-C(350)-C(345) | 2.1    | C(364)-C(365)-C(366)-N(14B) | 2.8    |
| Th(4B)-S(16B)-C(351)-C(356) | 74.4   | C(371)-N(15B)-C(367)-C(368) | 2.8    |
| Th(4B)-S(16B)-C(351)-C(352) | -102.2 | Th(4B)-N(15B)-C(367)-C(368) | 179.9  |
| C(356)-C(351)-C(352)-C(353) | -2.9   | N(15B)-C(367)-C(368)-C(369) | 1.4    |
| S(16B)-C(351)-C(352)-C(353) | 173.6  | C(367)-C(368)-C(369)-C(370) | -4.0   |
| C(351)-C(352)-C(353)-C(354) | -0.6   | C(368)-C(369)-C(370)-C(371) | 2.3    |
| C(352)-C(353)-C(354)-C(355) | 3.0    | C(367)-N(15B)-C(371)-C(370) | -4.7   |

|                             |        |
|-----------------------------|--------|
| Th(4B)-N(15B)-C(371)-C(370) | 178.2  |
| C(367)-N(15B)-C(371)-C(372) | -176.2 |
| Th(4B)-N(15B)-C(371)-C(372) | 6.8    |
| C(369)-C(370)-C(371)-N(15B) | 2.3    |
| C(369)-C(370)-C(371)-C(372) | 173.3  |
| C(376)-N(16B)-C(372)-C(373) | -3.5   |
| Th(4B)-N(16B)-C(372)-C(373) | 171.1  |
| C(376)-N(16B)-C(372)-C(371) | 179.2  |
| Th(4B)-N(16B)-C(372)-C(371) | -6.1   |
| N(15B)-C(371)-C(372)-N(16B) | -0.5   |
| C(370)-C(371)-C(372)-N(16B) | -171.8 |
| N(15B)-C(371)-C(372)-C(373) | -177.7 |
| C(370)-C(371)-C(372)-C(373) | 11.0   |
| N(16B)-C(372)-C(373)-C(374) | -1.9   |
| C(371)-C(372)-C(373)-C(374) | 175.2  |
| C(372)-C(373)-C(374)-C(375) | 4.9    |
| C(373)-C(374)-C(375)-C(376) | -2.5   |
| C(372)-N(16B)-C(376)-C(375) | 6.3    |
| Th(4B)-N(16B)-C(376)-C(375) | -168.5 |
| C(374)-C(375)-C(376)-N(16B) | -3.4   |



**Table S8.** Hydrogen bonds [ $\text{\AA}$  and  $^\circ$ ] for **1**.

| D-H...A                 | d(D-H) | d(H...A) | d(D...A)  | $\angle(\text{DHA})$ |
|-------------------------|--------|----------|-----------|----------------------|
| C(6)-H(6)...S(4)        | 0.95   | 2.89     | 3.574(14) | 129.5                |
| C(25)-H(25)...S(2)      | 0.95   | 2.86     | 3.621(5)  | 138.0                |
| C(33)-H(33)...S(5)      | 0.95   | 2.92     | 3.783(7)  | 151.7                |
| C(34)-H(34)...S(4)      | 0.95   | 2.71     | 3.163(12) | 109.9                |
| C(35)-H(35)...S(3)      | 0.95   | 2.74     | 3.235(11) | 113.1                |
| C(36)-H(36)...S(6)      | 0.95   | 2.95     | 3.809(7)  | 151.4                |
| C(44)-H(44)...S(1)      | 0.95   | 2.84     | 3.611(5)  | 138.5                |
| C(50)-H(50)...S(8)      | 0.95   | 2.97     | 3.561(15) | 121.3                |
| C(56)-H(56)...S(7)      | 0.95   | 2.91     | 3.553(14) | 126.3                |
| C(69)-H(69)...S(6)      | 0.95   | 2.92     | 3.659(5)  | 136.0                |
| C(77)-H(77)...S(1)#1    | 0.95   | 2.93     | 3.795(6)  | 152.6                |
| C(78)-H(78)...S(8)      | 0.95   | 2.76     | 3.237(12) | 111.7                |
| C(79)-H(79)...S(7)      | 0.95   | 2.73     | 3.223(12) | 112.8                |
| C(80)-H(80)...S(2)#1    | 0.95   | 2.86     | 3.751(6)  | 157.0                |
| C(88)-H(88)...S(5)      | 0.95   | 2.82     | 3.585(5)  | 137.9                |
| C(100)-H(100)...S(11)   | 0.95   | 2.87     | 3.579(14) | 132.4                |
| C(113)-H(113)...S(10)   | 0.95   | 2.90     | 3.661(5)  | 137.9                |
| C(121)-H(121)...S(13)#2 | 0.95   | 2.90     | 3.787(6)  | 155.6                |
| C(122)-H(122)...S(12)   | 0.95   | 2.75     | 3.202(12) | 110.3                |
| C(123)-H(123)...S(11)   | 0.95   | 2.72     | 3.239(12) | 115.0                |
| C(124)-H(124)...S(14)#2 | 0.95   | 2.87     | 3.756(6)  | 156.0                |
| C(132)-H(132)...S(9)    | 0.95   | 2.89     | 3.648(5)  | 137.9                |
| C(138)-H(138)...S(16)   | 0.95   | 2.94     | 3.649(13) | 132.8                |
| C(144)-H(144)...S(15)   | 0.95   | 2.98     | 3.543(15) | 119.4                |
| C(157)-H(157)...S(14)   | 0.95   | 2.85     | 3.611(5)  | 137.7                |
| C(165)-H(165)...S(9)    | 0.95   | 2.82     | 3.720(6)  | 157.6                |
| C(166)-H(166)...S(16)   | 0.95   | 2.76     | 3.261(12) | 114.1                |
| C(167)-H(167)...S(15)   | 0.95   | 2.72     | 3.204(13) | 112.5                |
| C(168)-H(168)...S(10)   | 0.95   | 2.92     | 3.799(6)  | 153.6                |
| C(176)-H(176)...S(13)   | 0.95   | 2.90     | 3.644(5)  | 136.5                |

Symmetry transformations used to generate equivalent atoms: #1  $x+1/2, y+1/2, z$  #2  $x-1$

**Table S9.** Crystal data and structure refinement for **2**.

|                                   |                                                                   |                    |
|-----------------------------------|-------------------------------------------------------------------|--------------------|
| Identification code               | ThSePh4bipy2_P21c                                                 |                    |
| Empirical formula                 | C <sub>49</sub> H <sub>41</sub> N <sub>5</sub> Se <sub>4</sub> Th |                    |
| Formula weight                    | 1247.75                                                           |                    |
| Temperature                       | 100(2) K                                                          |                    |
| Wavelength                        | 0.71073 Å                                                         |                    |
| Crystal system                    | Monoclinic                                                        |                    |
| Space group                       | P2 <sub>1</sub> /c                                                |                    |
| Unit cell dimensions              | a = 20.895(2) Å                                                   | α = 90°.           |
|                                   | b = 9.4734(11) Å                                                  | β = 100.9157(14)°. |
|                                   | c = 22.815(3) Å                                                   | γ = 90°.           |
| Volume                            | 4434.5(9) Å <sup>3</sup>                                          |                    |
| Z                                 | 4                                                                 |                    |
| Density (calculated)              | 1.869 Mg/m <sup>3</sup>                                           |                    |
| Absorption coefficient            | 6.686 mm <sup>-1</sup>                                            |                    |
| F(000)                            | 2384                                                              |                    |
| Crystal size                      | 0.350 x 0.060 x 0.050 mm <sup>3</sup>                             |                    |
| Theta range for data collection   | 1.818 to 27.482°.                                                 |                    |
| Index ranges                      | -27 ≤ h ≤ 26, -12 ≤ k ≤ 12, -29 ≤ l ≤ 29                          |                    |
| Reflections collected             | 38078                                                             |                    |
| Independent reflections           | 10171 [R(int) = 0.0586]                                           |                    |
| Completeness to theta = 25.242°   | 100.0 %                                                           |                    |
| Absorption correction             | Semi-empirical from equivalents                                   |                    |
| Max. and min. transmission        | 0.2636 and 0.1461                                                 |                    |
| Refinement method                 | Full-matrix least-squares on F <sup>2</sup>                       |                    |
| Data / restraints / parameters    | 10171 / 0 / 520                                                   |                    |
| Goodness-of-fit on F <sup>2</sup> | 1.030                                                             |                    |
| Final R indices [I > 2σ(I)]       | R1 = 0.0404, wR2 = 0.0879                                         |                    |
| R indices (all data)              | R1 = 0.0572, wR2 = 0.0952                                         |                    |
| Extinction coefficient            | n/a                                                               |                    |
| Largest diff. peak and hole       | 1.415 and -1.591 e.Å <sup>-3</sup>                                |                    |

**Table S10.** Atomic coordinates ( $\times 10^4$ ) and equivalent isotropic displacement parameters ( $\text{\AA}^2 \times 10^3$ ) for **2**. U(eq) is defined as one third of the trace of the orthogonalized  $U^{ij}$  tensor.

|       | x        | y        | z        | U(eq) |
|-------|----------|----------|----------|-------|
| Th(1) | -2169(1) | 3544(1)  | -2094(1) | 20(1) |
| Se(1) | -1164(1) | 1303(1)  | -2014(1) | 25(1) |
| Se(2) | -2945(1) | 5476(1)  | -1486(1) | 25(1) |
| Se(3) | -3210(1) | 2720(1)  | -3101(1) | 29(1) |
| Se(4) | -1656(1) | 3083(1)  | -3228(1) | 27(1) |
| N(1)  | -2671(2) | 1597(5)  | -1495(2) | 24(1) |
| N(2)  | -1703(2) | 3275(5)  | -934(2)  | 22(1) |
| N(3)  | -2405(2) | 6040(5)  | -2592(2) | 25(1) |
| N(4)  | -1189(2) | 5291(5)  | -2056(2) | 22(1) |
| C(1)  | -1100(3) | 3(6)     | -1359(2) | 25(1) |
| C(2)  | -508(3)  | -85(7)   | -948(3)  | 30(1) |
| C(3)  | -412(3)  | -1104(7) | -518(3)  | 36(2) |
| C(4)  | -903(3)  | -2051(7) | -472(3)  | 37(2) |
| C(5)  | -1499(3) | -1966(7) | -870(3)  | 35(2) |
| C(6)  | -1585(3) | -960(7)  | -1309(3) | 28(1) |
| C(7)  | -3081(3) | 4654(7)  | -751(3)  | 30(1) |
| C(8)  | -2699(3) | 5092(8)  | -212(3)  | 37(2) |
| C(9)  | -2787(4) | 4507(9)  | 320(3)   | 49(2) |
| C(10) | -3261(4) | 3500(9)  | 322(3)   | 51(2) |
| C(11) | -3656(4) | 3083(8)  | -210(3)  | 44(2) |
| C(12) | -3565(3) | 3679(7)  | -741(3)  | 37(2) |
| C(13) | -4088(3) | 2503(6)  | -2957(2) | 26(1) |
| C(14) | -4336(3) | 3230(7)  | -2527(3) | 34(2) |
| C(15) | -4974(3) | 3018(8)  | -2462(3) | 37(2) |
| C(16) | -5373(3) | 2105(7)  | -2835(3) | 41(2) |
| C(17) | -5140(3) | 1427(8)  | -3278(4) | 50(2) |
| C(18) | -4496(3) | 1611(7)  | -3342(3) | 44(2) |
| C(19) | -1636(3) | 4877(7)  | -3606(2) | 27(1) |
| C(20) | -2199(3) | 5496(7)  | -3934(2) | 30(1) |
| C(21) | -2176(3) | 6778(7)  | -4206(3) | 36(2) |
| C(22) | -1593(3) | 7510(8)  | -4156(3) | 37(2) |

|       |          |           |          |        |
|-------|----------|-----------|----------|--------|
| C(23) | -1031(3) | 6920(7)   | -3835(3) | 36(2)  |
| C(24) | -1045(3) | 5619(7)   | -3563(3) | 32(1)  |
| C(25) | -2450(3) | 1352(6)   | -902(3)  | 27(1)  |
| C(26) | -3163(3) | 779(7)    | -1773(3) | 32(1)  |
| C(27) | -3454(3) | -252(8)   | -1483(3) | 42(2)  |
| C(28) | -3232(3) | -466(8)   | -891(3)  | 49(2)  |
| C(29) | -2733(3) | 353(7)    | -597(3)  | 37(2)  |
| C(30) | -1905(3) | 2248(6)   | -603(2)  | 24(1)  |
| C(31) | -1236(3) | 4151(7)   | -657(3)  | 28(1)  |
| C(32) | -940(3)  | 4029(7)   | -61(3)   | 34(1)  |
| C(33) | -1132(3) | 2929(8)   | 260(3)   | 37(2)  |
| C(34) | -1622(3) | 2047(7)   | -6(2)    | 30(1)  |
| C(35) | -1936(3) | 7026(6)   | -2574(2) | 23(1)  |
| C(36) | -3016(3) | 6390(7)   | -2849(3) | 31(1)  |
| C(37) | -3184(3) | 7715(8)   | -3085(3) | 40(2)  |
| C(38) | -2703(3) | 8721(7)   | -3056(3) | 35(2)  |
| C(39) | -2065(3) | 8363(6)   | -2805(3) | 29(1)  |
| C(40) | -1262(3) | 6611(6)   | -2292(2) | 20(1)  |
| C(41) | -573(3)  | 4865(6)   | -1832(2) | 26(1)  |
| C(42) | -29(3)   | 5669(7)   | -1824(3) | 30(1)  |
| C(43) | -113(3)  | 7042(7)   | -2045(3) | 29(1)  |
| C(44) | -733(3)  | 7492(7)   | -2278(3) | 29(1)  |
| N(5)  | -3892(3) | -1471(10) | 292(3)   | 106(3) |
| C(45) | -4184(3) | -2780(8)  | 322(3)   | 88(3)  |
| C(46) | -4651(3) | -2958(6)  | 677(3)   | 87(4)  |
| C(47) | -4826(3) | -1825(9)  | 1000(3)  | 82(3)  |
| C(48) | -4534(4) | -516(7)   | 970(3)   | 87(3)  |
| C(49) | -4067(4) | -338(7)   | 616(4)   | 103(4) |

**Table S11.** Bond lengths [Å] and angles [°] for **2**.

|             |           |             |           |
|-------------|-----------|-------------|-----------|
| Th(1)-N(4)  | 2.620(4)  | C(8)-H(8)   | 0.9500    |
| Th(1)-N(3)  | 2.629(5)  | C(9)-C(10)  | 1.376(11) |
| Th(1)-N(1)  | 2.630(5)  | C(9)-H(9)   | 0.9500    |
| Th(1)-N(2)  | 2.653(4)  | C(10)-C(11) | 1.388(10) |
| Th(1)-Se(3) | 2.9544(6) | C(10)-H(10) | 0.9500    |
| Th(1)-Se(2) | 2.9575(6) | C(11)-C(12) | 1.383(9)  |
| Th(1)-Se(1) | 2.9676(6) | C(11)-H(11) | 0.9500    |
| Th(1)-Se(4) | 3.0154(6) | C(12)-H(12) | 0.9500    |
| Se(1)-C(1)  | 1.922(6)  | C(13)-C(14) | 1.377(8)  |
| Se(2)-C(7)  | 1.919(6)  | C(13)-C(18) | 1.389(8)  |
| Se(3)-C(13) | 1.935(5)  | C(14)-C(15) | 1.384(8)  |
| Se(4)-C(19) | 1.910(6)  | C(14)-H(14) | 0.9500    |
| N(1)-C(26)  | 1.347(7)  | C(15)-C(16) | 1.377(9)  |
| N(1)-C(25)  | 1.364(7)  | C(15)-H(15) | 0.9500    |
| N(2)-C(31)  | 1.345(7)  | C(16)-C(17) | 1.364(10) |
| N(2)-C(30)  | 1.347(7)  | C(16)-H(16) | 0.9500    |
| N(3)-C(36)  | 1.341(7)  | C(17)-C(18) | 1.392(9)  |
| N(3)-C(35)  | 1.350(7)  | C(17)-H(17) | 0.9500    |
| N(4)-C(41)  | 1.354(7)  | C(18)-H(18) | 0.9500    |
| N(4)-C(40)  | 1.359(7)  | C(19)-C(20) | 1.398(8)  |
| C(1)-C(6)   | 1.384(8)  | C(19)-C(24) | 1.409(8)  |
| C(1)-C(2)   | 1.406(8)  | C(20)-C(21) | 1.368(9)  |
| C(2)-C(3)   | 1.364(9)  | C(20)-H(20) | 0.9500    |
| C(2)-H(2)   | 0.9500    | C(21)-C(22) | 1.387(9)  |
| C(3)-C(4)   | 1.382(9)  | C(21)-H(21) | 0.9500    |
| C(3)-H(3)   | 0.9500    | C(22)-C(23) | 1.380(9)  |
| C(4)-C(5)   | 1.398(8)  | C(22)-H(22) | 0.9500    |
| C(4)-H(4)   | 0.9500    | C(23)-C(24) | 1.383(9)  |
| C(5)-C(6)   | 1.370(8)  | C(23)-H(23) | 0.9500    |
| C(5)-H(5)   | 0.9500    | C(24)-H(24) | 0.9500    |
| C(6)-H(6)   | 0.9500    | C(25)-C(29) | 1.373(8)  |
| C(7)-C(12)  | 1.372(9)  | C(25)-C(30) | 1.480(8)  |
| C(7)-C(8)   | 1.397(8)  | C(26)-C(27) | 1.383(8)  |
| C(8)-C(9)   | 1.377(9)  | C(26)-H(26) | 0.9500    |

|                  |            |                   |             |
|------------------|------------|-------------------|-------------|
| C(27)-C(28)      | 1.357(9)   | C(39)-H(39)       | 0.9500      |
| C(27)-H(27)      | 0.9500     | C(40)-C(44)       | 1.381(8)    |
| C(28)-C(29)      | 1.369(9)   | C(41)-C(42)       | 1.366(8)    |
| C(28)-H(28)      | 0.9500     | C(41)-H(41)       | 0.9500      |
| C(29)-H(29)      | 0.9500     | C(42)-C(43)       | 1.394(9)    |
| C(30)-C(34)      | 1.392(8)   | C(42)-H(42)       | 0.9500      |
| C(31)-C(32)      | 1.389(8)   | C(43)-C(44)       | 1.371(8)    |
| C(31)-H(31)      | 0.9500     | C(43)-H(43)       | 0.9500      |
| C(32)-C(33)      | 1.378(9)   | C(44)-H(44)       | 0.9500      |
| C(32)-H(32)      | 0.9500     | N(5)-C(45)        | 1.3900      |
| C(33)-C(34)      | 1.370(9)   | N(5)-C(49)        | 1.3900      |
| C(33)-H(33)      | 0.9500     | C(45)-C(46)       | 1.3900      |
| C(34)-H(34)      | 0.9500     | C(45)-H(45)       | 0.9500      |
| C(35)-C(39)      | 1.379(8)   | C(46)-C(47)       | 1.3900      |
| C(35)-C(40)      | 1.486(7)   | C(46)-H(46)       | 0.9500      |
| C(36)-C(37)      | 1.384(9)   | C(47)-C(48)       | 1.3900      |
| C(36)-H(36)      | 0.9500     | C(47)-H(47)       | 0.9500      |
| C(37)-C(38)      | 1.377(10)  | C(48)-C(49)       | 1.3900      |
| C(37)-H(37)      | 0.9500     | C(48)-H(48)       | 0.9500      |
| C(38)-C(39)      | 1.390(8)   | C(49)-H(49)       | 0.9500      |
| C(38)-H(38)      | 0.9500     |                   |             |
|                  |            |                   |             |
| N(4)-Th(1)-N(3)  | 61.84(14)  | Se(3)-Th(1)-Se(2) | 98.030(18)  |
| N(4)-Th(1)-N(1)  | 144.25(13) | N(4)-Th(1)-Se(1)  | 84.89(10)   |
| N(3)-Th(1)-N(1)  | 142.67(14) | N(3)-Th(1)-Se(1)  | 137.95(10)  |
| N(4)-Th(1)-N(2)  | 83.76(14)  | N(1)-Th(1)-Se(1)  | 79.22(10)   |
| N(3)-Th(1)-N(2)  | 121.44(14) | N(2)-Th(1)-Se(1)  | 75.43(10)   |
| N(1)-Th(1)-N(2)  | 61.37(14)  | Se(3)-Th(1)-Se(1) | 105.466(19) |
| N(4)-Th(1)-Se(3) | 130.40(10) | Se(2)-Th(1)-Se(1) | 149.119(17) |
| N(3)-Th(1)-Se(3) | 81.42(10)  | N(4)-Th(1)-Se(4)  | 73.61(10)   |
| N(1)-Th(1)-Se(3) | 84.93(10)  | N(3)-Th(1)-Se(4)  | 80.04(10)   |
| N(2)-Th(1)-Se(3) | 145.80(10) | N(1)-Th(1)-Se(4)  | 125.87(10)  |
| N(4)-Th(1)-Se(2) | 95.03(10)  | N(2)-Th(1)-Se(4)  | 136.02(9)   |
| N(3)-Th(1)-Se(2) | 64.66(10)  | Se(3)-Th(1)-Se(4) | 67.846(18)  |
| N(1)-Th(1)-Se(2) | 83.26(10)  | Se(2)-Th(1)-Se(4) | 143.849(18) |
| N(2)-Th(1)-Se(2) | 73.88(10)  | Se(1)-Th(1)-Se(4) | 65.575(17)  |

|                   |            |                   |          |
|-------------------|------------|-------------------|----------|
| C(1)-Se(1)-Th(1)  | 116.79(16) | C(8)-C(7)-Se(2)   | 119.6(5) |
| C(7)-Se(2)-Th(1)  | 110.12(18) | C(9)-C(8)-C(7)    | 120.5(7) |
| C(13)-Se(3)-Th(1) | 118.57(17) | C(9)-C(8)-H(8)    | 119.8    |
| C(19)-Se(4)-Th(1) | 107.47(16) | C(7)-C(8)-H(8)    | 119.8    |
| C(26)-N(1)-C(25)  | 117.0(5)   | C(10)-C(9)-C(8)   | 119.8(7) |
| C(26)-N(1)-Th(1)  | 120.2(4)   | C(10)-C(9)-H(9)   | 120.1    |
| C(25)-N(1)-Th(1)  | 122.8(4)   | C(8)-C(9)-H(9)    | 120.1    |
| C(31)-N(2)-C(30)  | 117.3(5)   | C(9)-C(10)-C(11)  | 120.3(6) |
| C(31)-N(2)-Th(1)  | 120.3(4)   | C(9)-C(10)-H(10)  | 119.9    |
| C(30)-N(2)-Th(1)  | 122.4(4)   | C(11)-C(10)-H(10) | 119.9    |
| C(36)-N(3)-C(35)  | 117.9(5)   | C(12)-C(11)-C(10) | 119.5(7) |
| C(36)-N(3)-Th(1)  | 119.8(4)   | C(12)-C(11)-H(11) | 120.3    |
| C(35)-N(3)-Th(1)  | 122.2(4)   | C(10)-C(11)-H(11) | 120.3    |
| C(41)-N(4)-C(40)  | 116.8(5)   | C(7)-C(12)-C(11)  | 120.9(6) |
| C(41)-N(4)-Th(1)  | 120.4(4)   | C(7)-C(12)-H(12)  | 119.6    |
| C(40)-N(4)-Th(1)  | 122.7(3)   | C(11)-C(12)-H(12) | 119.6    |
| C(6)-C(1)-C(2)    | 118.2(5)   | C(14)-C(13)-C(18) | 119.1(6) |
| C(6)-C(1)-Se(1)   | 122.7(4)   | C(14)-C(13)-Se(3) | 124.4(4) |
| C(2)-C(1)-Se(1)   | 118.7(4)   | C(18)-C(13)-Se(3) | 116.5(5) |
| C(3)-C(2)-C(1)    | 120.8(6)   | C(13)-C(14)-C(15) | 120.2(6) |
| C(3)-C(2)-H(2)    | 119.6      | C(13)-C(14)-H(14) | 119.9    |
| C(1)-C(2)-H(2)    | 119.6      | C(15)-C(14)-H(14) | 119.9    |
| C(2)-C(3)-C(4)    | 120.2(6)   | C(16)-C(15)-C(14) | 120.6(6) |
| C(2)-C(3)-H(3)    | 119.9      | C(16)-C(15)-H(15) | 119.7    |
| C(4)-C(3)-H(3)    | 119.9      | C(14)-C(15)-H(15) | 119.7    |
| C(3)-C(4)-C(5)    | 119.8(6)   | C(17)-C(16)-C(15) | 119.5(6) |
| C(3)-C(4)-H(4)    | 120.1      | C(17)-C(16)-H(16) | 120.2    |
| C(5)-C(4)-H(4)    | 120.1      | C(15)-C(16)-H(16) | 120.2    |
| C(6)-C(5)-C(4)    | 119.6(6)   | C(16)-C(17)-C(18) | 120.5(7) |
| C(6)-C(5)-H(5)    | 120.2      | C(16)-C(17)-H(17) | 119.7    |
| C(4)-C(5)-H(5)    | 120.2      | C(18)-C(17)-H(17) | 119.7    |
| C(5)-C(6)-C(1)    | 121.4(5)   | C(13)-C(18)-C(17) | 120.0(7) |
| C(5)-C(6)-H(6)    | 119.3      | C(13)-C(18)-H(18) | 120.0    |
| C(1)-C(6)-H(6)    | 119.3      | C(17)-C(18)-H(18) | 120.0    |
| C(12)-C(7)-C(8)   | 119.0(6)   | C(20)-C(19)-C(24) | 117.8(6) |
| C(12)-C(7)-Se(2)  | 121.3(5)   | C(20)-C(19)-Se(4) | 121.8(4) |

|                   |          |                   |          |
|-------------------|----------|-------------------|----------|
| C(24)-C(19)-Se(4) | 120.4(4) | C(32)-C(31)-H(31) | 118.1    |
| C(21)-C(20)-C(19) | 121.2(6) | C(33)-C(32)-C(31) | 117.7(6) |
| C(21)-C(20)-H(20) | 119.4    | C(33)-C(32)-H(32) | 121.2    |
| C(19)-C(20)-H(20) | 119.4    | C(31)-C(32)-H(32) | 121.2    |
| C(20)-C(21)-C(22) | 120.7(6) | C(34)-C(33)-C(32) | 119.6(6) |
| C(20)-C(21)-H(21) | 119.6    | C(34)-C(33)-H(33) | 120.2    |
| C(22)-C(21)-H(21) | 119.6    | C(32)-C(33)-H(33) | 120.2    |
| C(23)-C(22)-C(21) | 119.2(7) | C(33)-C(34)-C(30) | 119.6(6) |
| C(23)-C(22)-H(22) | 120.4    | C(33)-C(34)-H(34) | 120.2    |
| C(21)-C(22)-H(22) | 120.4    | C(30)-C(34)-H(34) | 120.2    |
| C(22)-C(23)-C(24) | 120.7(6) | N(3)-C(35)-C(39)  | 122.4(5) |
| C(22)-C(23)-H(23) | 119.6    | N(3)-C(35)-C(40)  | 117.0(5) |
| C(24)-C(23)-H(23) | 119.6    | C(39)-C(35)-C(40) | 120.7(5) |
| C(23)-C(24)-C(19) | 120.4(6) | N(3)-C(36)-C(37)  | 123.0(6) |
| C(23)-C(24)-H(24) | 119.8    | N(3)-C(36)-H(36)  | 118.5    |
| C(19)-C(24)-H(24) | 119.8    | C(37)-C(36)-H(36) | 118.5    |
| N(1)-C(25)-C(29)  | 121.5(6) | C(38)-C(37)-C(36) | 118.7(6) |
| N(1)-C(25)-C(30)  | 116.5(5) | C(38)-C(37)-H(37) | 120.7    |
| C(29)-C(25)-C(30) | 122.0(5) | C(36)-C(37)-H(37) | 120.7    |
| N(1)-C(26)-C(27)  | 123.1(6) | C(37)-C(38)-C(39) | 119.0(6) |
| N(1)-C(26)-H(26)  | 118.4    | C(37)-C(38)-H(38) | 120.5    |
| C(27)-C(26)-H(26) | 118.4    | C(39)-C(38)-H(38) | 120.5    |
| C(28)-C(27)-C(26) | 118.9(6) | C(35)-C(39)-C(38) | 119.0(6) |
| C(28)-C(27)-H(27) | 120.5    | C(35)-C(39)-H(39) | 120.5    |
| C(26)-C(27)-H(27) | 120.5    | C(38)-C(39)-H(39) | 120.5    |
| C(27)-C(28)-C(29) | 119.2(6) | N(4)-C(40)-C(44)  | 121.3(5) |
| C(27)-C(28)-H(28) | 120.4    | N(4)-C(40)-C(35)  | 116.2(5) |
| C(29)-C(28)-H(28) | 120.4    | C(44)-C(40)-C(35) | 122.6(5) |
| C(28)-C(29)-C(25) | 120.2(6) | N(4)-C(41)-C(42)  | 124.7(6) |
| C(28)-C(29)-H(29) | 119.9    | N(4)-C(41)-H(41)  | 117.6    |
| C(25)-C(29)-H(29) | 119.9    | C(42)-C(41)-H(41) | 117.6    |
| N(2)-C(30)-C(34)  | 121.9(5) | C(41)-C(42)-C(43) | 117.8(5) |
| N(2)-C(30)-C(25)  | 116.8(5) | C(41)-C(42)-H(42) | 121.1    |
| C(34)-C(30)-C(25) | 121.3(5) | C(43)-C(42)-H(42) | 121.1    |
| N(2)-C(31)-C(32)  | 123.9(6) | C(44)-C(43)-C(42) | 118.4(5) |
| N(2)-C(31)-H(31)  | 118.1    | C(44)-C(43)-H(43) | 120.8    |



|                   |          |                   |       |
|-------------------|----------|-------------------|-------|
| C(42)-C(43)-H(43) | 120.8    | C(47)-C(46)-H(46) | 120.0 |
| C(43)-C(44)-C(40) | 120.9(6) | C(48)-C(47)-C(46) | 120.0 |
| C(43)-C(44)-H(44) | 119.5    | C(48)-C(47)-H(47) | 120.0 |
| C(40)-C(44)-H(44) | 119.5    | C(46)-C(47)-H(47) | 120.0 |
| C(45)-N(5)-C(49)  | 120.0    | C(49)-C(48)-C(47) | 120.0 |
| C(46)-C(45)-N(5)  | 120.0    | C(49)-C(48)-H(48) | 120.0 |
| C(46)-C(45)-H(45) | 120.0    | C(47)-C(48)-H(48) | 120.0 |
| N(5)-C(45)-H(45)  | 120.0    | C(48)-C(49)-N(5)  | 120.0 |
| C(45)-C(46)-C(47) | 120.0    | C(48)-C(49)-H(49) | 120.0 |
| C(45)-C(46)-H(46) | 120.0    | N(5)-C(49)-H(49)  | 120.0 |

---

**Table S12.** Anisotropic displacement parameters ( $\text{\AA}^2 \times 10^3$ ) for **2**.The anisotropic displacement factor exponent takes the form:  $-2\pi^2 [ h^2 a^{*2}U^{11} + \dots + 2 h k a^* b^* U^{12} ]$ 

|       | U <sup>11</sup> | U <sup>22</sup> | U <sup>33</sup> | U <sup>23</sup> | U <sup>13</sup> | U <sup>12</sup> |
|-------|-----------------|-----------------|-----------------|-----------------|-----------------|-----------------|
| Th(1) | 12(1)           | 31(1)           | 16(1)           | 0(1)            | 3(1)            | -1(1)           |
| Se(1) | 19(1)           | 33(1)           | 23(1)           | -1(1)           | 8(1)            | 1(1)            |
| Se(2) | 17(1)           | 40(1)           | 18(1)           | 1(1)            | 4(1)            | 6(1)            |
| Se(3) | 19(1)           | 48(1)           | 19(1)           | -2(1)           | 2(1)            | -7(1)           |
| Se(4) | 20(1)           | 42(1)           | 20(1)           | -3(1)           | 7(1)            | -3(1)           |
| N(1)  | 14(2)           | 35(3)           | 24(2)           | -1(2)           | 3(2)            | -2(2)           |
| N(2)  | 17(2)           | 30(3)           | 20(2)           | 3(2)            | 7(2)            | 4(2)            |
| N(3)  | 17(2)           | 37(3)           | 20(2)           | 0(2)            | 5(2)            | 0(2)            |
| N(4)  | 18(2)           | 28(3)           | 20(2)           | -3(2)           | 2(2)            | 0(2)            |
| C(1)  | 23(3)           | 35(3)           | 18(3)           | -4(2)           | 6(2)            | 2(2)            |
| C(2)  | 21(3)           | 40(4)           | 29(3)           | -3(3)           | 4(2)            | 3(3)            |
| C(3)  | 27(3)           | 45(4)           | 34(4)           | -6(3)           | -3(3)           | 6(3)            |
| C(4)  | 43(4)           | 47(4)           | 19(3)           | 5(3)            | 2(3)            | 6(3)            |
| C(5)  | 35(4)           | 44(4)           | 27(3)           | -3(3)           | 11(3)           | 1(3)            |
| C(6)  | 19(3)           | 41(4)           | 22(3)           | -2(3)           | 0(2)            | 1(3)            |
| C(7)  | 21(3)           | 45(4)           | 23(3)           | 4(3)            | 7(2)            | 10(3)           |
| C(8)  | 23(3)           | 63(5)           | 24(3)           | 1(3)            | 5(3)            | 7(3)            |
| C(9)  | 42(4)           | 85(6)           | 19(3)           | 1(3)            | 6(3)            | 17(4)           |
| C(10) | 52(5)           | 79(6)           | 27(4)           | 17(4)           | 18(3)           | 17(4)           |
| C(11) | 52(4)           | 54(5)           | 33(4)           | 9(3)            | 19(3)           | 1(4)            |
| C(12) | 41(4)           | 47(4)           | 23(3)           | 5(3)            | 8(3)            | 1(3)            |
| C(13) | 17(3)           | 36(3)           | 24(3)           | 7(2)            | 1(2)            | 0(2)            |
| C(14) | 14(3)           | 54(4)           | 32(3)           | -5(3)           | 1(2)            | -8(3)           |
| C(15) | 21(3)           | 52(4)           | 39(4)           | 0(3)            | 7(3)            | 2(3)            |
| C(16) | 17(3)           | 37(4)           | 66(5)           | 3(3)            | 1(3)            | -7(3)           |
| C(17) | 32(4)           | 39(4)           | 77(6)           | -14(4)          | 8(4)            | -14(3)          |
| C(18) | 25(3)           | 50(4)           | 55(4)           | -9(4)           | 1(3)            | -12(3)          |
| C(19) | 23(3)           | 44(4)           | 15(3)           | -3(2)           | 8(2)            | 0(3)            |
| C(20) | 21(3)           | 54(4)           | 14(3)           | -3(3)           | 5(2)            | -2(3)           |
| C(21) | 33(3)           | 55(4)           | 20(3)           | 1(3)            | 6(3)            | 4(3)            |
| C(22) | 41(4)           | 50(4)           | 25(3)           | 1(3)            | 16(3)           | 1(3)            |

|       |        |         |         |        |        |        |
|-------|--------|---------|---------|--------|--------|--------|
| C(23) | 29(3)  | 49(4)   | 34(4)   | -1(3)  | 13(3)  | -3(3)  |
| C(24) | 29(3)  | 48(4)   | 21(3)   | -2(3)  | 15(3)  | -8(3)  |
| C(25) | 22(3)  | 37(3)   | 24(3)   | 4(3)   | 7(2)   | 4(3)   |
| C(26) | 22(3)  | 41(4)   | 32(3)   | 5(3)   | 4(3)   | -5(3)  |
| C(27) | 35(4)  | 54(5)   | 37(4)   | 2(3)   | 7(3)   | -19(3) |
| C(28) | 43(4)  | 64(5)   | 43(4)   | 13(4)  | 13(3)  | -22(4) |
| C(29) | 33(3)  | 50(4)   | 31(3)   | 10(3)  | 14(3)  | -6(3)  |
| C(30) | 17(3)  | 32(3)   | 22(3)   | 1(2)   | 6(2)   | 5(2)   |
| C(31) | 25(3)  | 38(3)   | 23(3)   | -4(3)  | 9(2)   | -3(3)  |
| C(32) | 27(3)  | 47(4)   | 27(3)   | -4(3)  | 5(3)   | -1(3)  |
| C(33) | 30(3)  | 56(4)   | 22(3)   | 4(3)   | 1(3)   | 2(3)   |
| C(34) | 34(3)  | 41(4)   | 17(3)   | 2(3)   | 7(2)   | -1(3)  |
| C(35) | 24(3)  | 31(3)   | 15(3)   | 1(2)   | 5(2)   | 2(2)   |
| C(36) | 21(3)  | 47(4)   | 25(3)   | 4(3)   | 4(2)   | 3(3)   |
| C(37) | 27(3)  | 67(5)   | 29(3)   | 14(3)  | 8(3)   | 17(3)  |
| C(38) | 40(4)  | 37(4)   | 27(3)   | 10(3)  | 5(3)   | 14(3)  |
| C(39) | 29(3)  | 33(3)   | 25(3)   | 0(3)   | 5(2)   | 7(3)   |
| C(40) | 21(3)  | 23(3)   | 18(3)   | -2(2)  | 7(2)   | 3(2)   |
| C(41) | 22(3)  | 30(3)   | 27(3)   | 1(2)   | 4(2)   | 3(2)   |
| C(42) | 15(3)  | 39(4)   | 37(3)   | -2(3)  | 5(2)   | 0(3)   |
| C(43) | 15(3)  | 41(4)   | 32(3)   | -10(3) | 9(2)   | -7(2)  |
| C(44) | 27(3)  | 33(3)   | 30(3)   | -1(3)  | 10(3)  | -1(3)  |
| N(5)  | 116(8) | 139(10) | 65(6)   | 18(6)  | 19(6)  | -15(8) |
| C(45) | 57(6)  | 95(9)   | 110(9)  | -11(7) | 9(6)   | 13(6)  |
| C(46) | 42(5)  | 84(8)   | 125(10) | 26(7)  | -9(6)  | -24(5) |
| C(47) | 64(6)  | 126(10) | 59(6)   | -7(6)  | 18(5)  | -25(7) |
| C(48) | 59(6)  | 93(8)   | 101(9)  | -22(7) | -10(6) | -4(6)  |
| C(49) | 98(10) | 116(11) | 86(9)   | 34(8)  | -7(7)  | -26(8) |

---

**Table S13.** Hydrogen coordinates ( $\times 10^4$ ) and isotropic displacement parameters ( $\text{\AA}^2 \times 10^{-3}$ ) for **2**.

|       | x     | y     | z     | U(eq) |
|-------|-------|-------|-------|-------|
| H(2)  | -170  | 574   | -970  | 36    |
| H(3)  | -6    | -1164 | -249  | 44    |
| H(4)  | -836  | -2756 | -170  | 44    |
| H(5)  | -1841 | -2603 | -837  | 42    |
| H(6)  | -1987 | -922  | -1586 | 33    |
| H(8)  | -2377 | 5799  | -212  | 44    |
| H(9)  | -2521 | 4798  | 685   | 58    |
| H(10) | -3319 | 3088  | 688   | 62    |
| H(11) | -3986 | 2395  | -208  | 53    |
| H(12) | -3841 | 3410  | -1104 | 44    |
| H(14) | -4068 | 3879  | -2274 | 41    |
| H(15) | -5138 | 3506  | -2158 | 45    |
| H(16) | -5808 | 1948  | -2783 | 49    |
| H(17) | -5419 | 826   | -3545 | 60    |
| H(18) | -4335 | 1126  | -3649 | 53    |
| H(20) | -2604 | 5019  | -3969 | 35    |
| H(21) | -2564 | 7171  | -4431 | 43    |
| H(22) | -1582 | 8406  | -4340 | 45    |
| H(23) | -630  | 7414  | -3800 | 43    |
| H(24) | -653  | 5223  | -3346 | 38    |
| H(26) | -3318 | 917   | -2188 | 38    |
| H(27) | -3802 | -802  | -1695 | 50    |
| H(28) | -3422 | -1174 | -684  | 59    |
| H(29) | -2582 | 228   | -181  | 45    |
| H(31) | -1100 | 4898  | -883  | 34    |
| H(32) | -616  | 4681  | 119   | 40    |
| H(33) | -926  | 2781  | 664   | 44    |
| H(34) | -1768 | 1304  | 216   | 36    |
| H(36) | -3348 | 5697  | -2871 | 37    |
| H(37) | -3622 | 7926  | -3263 | 49    |

|       |       |       |       |     |
|-------|-------|-------|-------|-----|
| H(38) | -2806 | 9646  | -3205 | 42  |
| H(39) | -1723 | 9029  | -2794 | 35  |
| H(41) | -515  | 3940  | -1670 | 32  |
| H(42) | 394   | 5305  | -1672 | 36  |
| H(43) | 250   | 7651  | -2035 | 34  |
| H(44) | -799  | 8423  | -2433 | 35  |
| H(45) | -4065 | -3554 | 101   | 106 |
| H(46) | -4851 | -3853 | 698   | 104 |
| H(47) | -5145 | -1947 | 1242  | 99  |
| H(48) | -4654 | 258   | 1191  | 105 |
| H(49) | -3868 | 557   | 595   | 124 |

---

**Table S14.** Torsion angles [°] for **2**.

|                         |           |                         |           |
|-------------------------|-----------|-------------------------|-----------|
| C(6)-C(1)-C(2)-C(3)     | 0.9(9)    | C(26)-N(1)-C(25)-C(30)  | 179.3(5)  |
| Se(1)-C(1)-C(2)-C(3)    | -172.1(5) | Th(1)-N(1)-C(25)-C(30)  | -0.1(7)   |
| C(1)-C(2)-C(3)-C(4)     | -1.4(9)   | C(25)-N(1)-C(26)-C(27)  | 1.4(9)    |
| C(2)-C(3)-C(4)-C(5)     | 0.4(10)   | Th(1)-N(1)-C(26)-C(27)  | -179.2(5) |
| C(3)-C(4)-C(5)-C(6)     | 1.1(10)   | N(1)-C(26)-C(27)-C(28)  | -0.6(11)  |
| C(4)-C(5)-C(6)-C(1)     | -1.7(9)   | C(26)-C(27)-C(28)-C(29) | 0.6(12)   |
| C(2)-C(1)-C(6)-C(5)     | 0.7(9)    | C(27)-C(28)-C(29)-C(25) | -1.6(11)  |
| Se(1)-C(1)-C(6)-C(5)    | 173.4(5)  | N(1)-C(25)-C(29)-C(28)  | 2.5(10)   |
| C(12)-C(7)-C(8)-C(9)    | 2.9(10)   | C(30)-C(25)-C(29)-C(28) | -179.3(6) |
| Se(2)-C(7)-C(8)-C(9)    | -179.5(5) | C(31)-N(2)-C(30)-C(34)  | -3.1(8)   |
| C(7)-C(8)-C(9)-C(10)    | -1.1(11)  | Th(1)-N(2)-C(30)-C(34)  | 174.9(4)  |
| C(8)-C(9)-C(10)-C(11)   | -0.7(11)  | C(31)-N(2)-C(30)-C(25)  | 175.9(5)  |
| C(9)-C(10)-C(11)-C(12)  | 0.6(11)   | Th(1)-N(2)-C(30)-C(25)  | -6.1(6)   |
| C(8)-C(7)-C(12)-C(11)   | -3.1(10)  | N(1)-C(25)-C(30)-N(2)   | 3.9(8)    |
| Se(2)-C(7)-C(12)-C(11)  | 179.4(5)  | C(29)-C(25)-C(30)-N(2)  | -174.4(5) |
| C(10)-C(11)-C(12)-C(7)  | 1.3(11)   | N(1)-C(25)-C(30)-C(34)  | -177.0(5) |
| C(18)-C(13)-C(14)-C(15) | 3.1(10)   | C(29)-C(25)-C(30)-C(34) | 4.6(9)    |
| Se(3)-C(13)-C(14)-C(15) | 179.2(5)  | C(30)-N(2)-C(31)-C(32)  | 2.0(8)    |
| C(13)-C(14)-C(15)-C(16) | -1.5(10)  | Th(1)-N(2)-C(31)-C(32)  | -176.1(5) |
| C(14)-C(15)-C(16)-C(17) | -1.3(11)  | N(2)-C(31)-C(32)-C(33)  | 1.1(9)    |
| C(15)-C(16)-C(17)-C(18) | 2.5(11)   | C(31)-C(32)-C(33)-C(34) | -3.1(10)  |
| C(14)-C(13)-C(18)-C(17) | -2.0(10)  | C(32)-C(33)-C(34)-C(30) | 2.1(10)   |
| Se(3)-C(13)-C(18)-C(17) | -178.3(6) | N(2)-C(30)-C(34)-C(33)  | 1.1(9)    |
| C(16)-C(17)-C(18)-C(13) | -0.8(12)  | C(25)-C(30)-C(34)-C(33) | -177.8(6) |
| C(24)-C(19)-C(20)-C(21) | 0.2(8)    | C(36)-N(3)-C(35)-C(39)  | 0.4(8)    |
| Se(4)-C(19)-C(20)-C(21) | -179.6(4) | Th(1)-N(3)-C(35)-C(39)  | -176.2(4) |
| C(19)-C(20)-C(21)-C(22) | -0.9(9)   | C(36)-N(3)-C(35)-C(40)  | -179.6(5) |
| C(20)-C(21)-C(22)-C(23) | 0.9(9)    | Th(1)-N(3)-C(35)-C(40)  | 3.9(6)    |
| C(21)-C(22)-C(23)-C(24) | -0.3(9)   | C(35)-N(3)-C(36)-C(37)  | -1.1(8)   |
| C(22)-C(23)-C(24)-C(19) | -0.4(9)   | Th(1)-N(3)-C(36)-C(37)  | 175.5(5)  |
| C(20)-C(19)-C(24)-C(23) | 0.5(8)    | N(3)-C(36)-C(37)-C(38)  | 0.1(9)    |
| Se(4)-C(19)-C(24)-C(23) | -179.7(5) | C(36)-C(37)-C(38)-C(39) | 1.6(9)    |
| C(26)-N(1)-C(25)-C(29)  | -2.3(8)   | N(3)-C(35)-C(39)-C(38)  | 1.3(9)    |
| Th(1)-N(1)-C(25)-C(29)  | 178.3(4)  | C(40)-C(35)-C(39)-C(38) | -178.7(5) |

|                         |           |                         |           |
|-------------------------|-----------|-------------------------|-----------|
| C(37)-C(38)-C(39)-C(35) | -2.3(9)   | N(4)-C(41)-C(42)-C(43)  | 1.8(9)    |
| C(41)-N(4)-C(40)-C(44)  | -2.9(8)   | C(41)-C(42)-C(43)-C(44) | -2.3(8)   |
| Th(1)-N(4)-C(40)-C(44)  | -178.2(4) | C(42)-C(43)-C(44)-C(40) | 0.3(9)    |
| C(41)-N(4)-C(40)-C(35)  | 175.7(5)  | N(4)-C(40)-C(44)-C(43)  | 2.4(8)    |
| Th(1)-N(4)-C(40)-C(35)  | 0.4(6)    | C(35)-C(40)-C(44)-C(43) | -176.1(5) |
| N(3)-C(35)-C(40)-N(4)   | -2.7(7)   | C(49)-N(5)-C(45)-C(46)  | 0.0       |
| C(39)-C(35)-C(40)-N(4)  | 177.3(5)  | N(5)-C(45)-C(46)-C(47)  | 0.0       |
| N(3)-C(35)-C(40)-C(44)  | 175.9(5)  | C(45)-C(46)-C(47)-C(48) | 0.0       |
| C(39)-C(35)-C(40)-C(44) | -4.1(8)   | C(46)-C(47)-C(48)-C(49) | 0.0       |
| C(40)-N(4)-C(41)-C(42)  | 0.8(8)    | C(47)-C(48)-C(49)-N(5)  | 0.0       |
| Th(1)-N(4)-C(41)-C(42)  | 176.2(5)  | C(45)-N(5)-C(49)-C(48)  | 0.0       |

**Table S15.** Hydrogen bonds [ $\text{\AA}$  and  $^\circ$ ] for **2**.

| D-H...A               | d(D-H) | d(H...A) | d(D...A) | $\angle$ (DHA) |
|-----------------------|--------|----------|----------|----------------|
| C(26)-H(26)...Se(3)   | 0.95   | 2.74     | 3.530(6) | 141.5          |
| C(36)-H(36)...Se(3)   | 0.95   | 2.89     | 3.534(7) | 125.8          |
| C(39)-H(39)...Se(1)#1 | 0.95   | 2.89     | 3.643(6) | 136.5          |
| C(41)-H(41)...Se(1)   | 0.95   | 2.88     | 3.591(6) | 132.5          |

Symmetry transformations used to generate equivalent atoms: #1  $x, y+1, z$



**Table S16.** Crystal data and structure refinement for **3**.

|                                   |                                                                                                 |                   |
|-----------------------------------|-------------------------------------------------------------------------------------------------|-------------------|
| Identification code               | ThSCF4bp4THF2_C2c                                                                               |                   |
| Empirical formula                 | C <sub>52</sub> H <sub>32</sub> F <sub>20</sub> N <sub>4</sub> O <sub>2</sub> S <sub>4</sub> Th |                   |
| Formula weight                    | 1485.09                                                                                         |                   |
| Temperature                       | 100(2) K                                                                                        |                   |
| Wavelength                        | 0.71073 Å                                                                                       |                   |
| Crystal system                    | Monoclinic                                                                                      |                   |
| Space group                       | C2/c                                                                                            |                   |
| Unit cell dimensions              | a = 26.2472(11) Å                                                                               | α = 90°.          |
|                                   | b = 12.5980(5) Å                                                                                | β = 114.1892(7)°. |
|                                   | c = 17.2129(7) Å                                                                                | γ = 90°.          |
| Volume                            | 5191.9(4) Å <sup>3</sup>                                                                        |                   |
| Z                                 | 4                                                                                               |                   |
| Density (calculated)              | 1.900 Mg/m <sup>3</sup>                                                                         |                   |
| Absorption coefficient            | 3.153 mm <sup>-1</sup>                                                                          |                   |
| F(000)                            | 2888                                                                                            |                   |
| Crystal size                      | 0.270 x 0.110 x 0.040 mm <sup>3</sup>                                                           |                   |
| Theta range for data collection   | 1.701 to 30.537°.                                                                               |                   |
| Index ranges                      | -37 ≤ h ≤ 37, -18 ≤ k ≤ 17, -24 ≤ l ≤ 24                                                        |                   |
| Reflections collected             | 32094                                                                                           |                   |
| Independent reflections           | 7926 [R(int) = 0.0412]                                                                          |                   |
| Completeness to theta = 25.242°   | 100.0 %                                                                                         |                   |
| Absorption correction             | Semi-empirical from equivalents                                                                 |                   |
| Max. and min. transmission        | 0.9025 and 0.6349                                                                               |                   |
| Refinement method                 | Full-matrix least-squares on F <sup>2</sup>                                                     |                   |
| Data / restraints / parameters    | 7926 / 250 / 421                                                                                |                   |
| Goodness-of-fit on F <sup>2</sup> | 1.046                                                                                           |                   |
| Final R indices [I > 2σ(I)]       | R1 = 0.0290, wR2 = 0.0643                                                                       |                   |
| R indices (all data)              | R1 = 0.0350, wR2 = 0.0662                                                                       |                   |
| Extinction coefficient            | n/a                                                                                             |                   |
| Largest diff. peak and hole       | 1.788 and -1.047 e.Å <sup>-3</sup>                                                              |                   |

**Table S17.** Atomic coordinates ( $\times 10^4$ ) and equivalent isotropic displacement parameters ( $\text{\AA}^2 \times 10^3$ ) for **3**. U(eq) is defined as one third of the trace of the orthogonalized  $U^{ij}$  tensor.

|       | x       | y        | z       | U(eq) |
|-------|---------|----------|---------|-------|
| Th(1) | 5000    | 1854(1)  | 7500    | 14(1) |
| S(1)  | 4155(1) | 640(1)   | 7717(1) | 19(1) |
| S(2)  | 5393(1) | 2840(1)  | 6343(1) | 22(1) |
| F(1)  | 4650(1) | -1544(1) | 7882(1) | 26(1) |
| F(2)  | 4271(1) | -3190(1) | 6813(1) | 32(1) |
| F(3)  | 3315(1) | -2999(1) | 5364(1) | 34(1) |
| F(4)  | 2760(1) | -1124(1) | 4997(1) | 30(1) |
| F(5)  | 3122(1) | 525(1)   | 6066(1) | 26(1) |
| F(6)  | 4752(1) | 2022(1)  | 4562(1) | 31(1) |
| F(7)  | 3926(1) | 3001(2)  | 3268(1) | 48(1) |
| F(8)  | 3589(1) | 4970(2)  | 3474(1) | 57(1) |
| F(9)  | 4087(1) | 5968(2)  | 5008(1) | 49(1) |
| F(10) | 4900(1) | 5001(1)  | 6319(1) | 35(1) |
| N(1)  | 4379(1) | 1068(2)  | 5990(1) | 18(1) |
| N(2)  | 4129(1) | 2967(2)  | 6508(1) | 20(1) |
| C(1)  | 3915(1) | -429(2)  | 7006(2) | 19(1) |
| C(2)  | 4188(1) | -1406(2) | 7168(2) | 21(1) |
| C(3)  | 3997(1) | -2264(2) | 6624(2) | 23(1) |
| C(4)  | 3514(1) | -2172(2) | 5889(2) | 24(1) |
| C(5)  | 3231(1) | -1220(2) | 5711(2) | 22(1) |
| C(6)  | 3426(1) | -376(2)  | 6261(2) | 20(1) |
| C(7)  | 4850(1) | 3464(2)  | 5493(2) | 23(1) |
| C(8)  | 4598(1) | 2996(2)  | 4699(2) | 27(1) |
| C(9)  | 4173(1) | 3493(3)  | 4025(2) | 35(1) |
| C(10) | 3999(1) | 4494(3)  | 4130(2) | 40(1) |
| C(11) | 4249(1) | 4988(3)  | 4904(2) | 36(1) |
| C(12) | 4665(1) | 4477(2)  | 5569(2) | 29(1) |
| C(13) | 3907(1) | 1565(2)  | 5454(2) | 20(1) |
| C(14) | 4527(1) | 160(2)   | 5723(2) | 21(1) |
| C(15) | 4226(1) | -276(2)  | 4928(2) | 25(1) |
| C(16) | 3747(1) | 239(3)   | 4385(2) | 31(1) |

|        |         |          |         |       |
|--------|---------|----------|---------|-------|
| C(17)  | 3586(1) | 1167(3)  | 4648(2) | 28(1) |
| C(18)  | 3760(1) | 2578(2)  | 5754(2) | 20(1) |
| C(19)  | 4021(1) | 3924(2)  | 6760(2) | 23(1) |
| C(20)  | 3544(1) | 4505(2)  | 6295(2) | 28(1) |
| C(21)  | 3161(1) | 4077(2)  | 5548(2) | 32(1) |
| C(22)  | 3266(1) | 3112(2)  | 5271(2) | 27(1) |
| O(1A)  | 2543(2) | 1968(6)  | 3099(3) | 59(2) |
| C(23A) | 2044(4) | 2539(10) | 2684(5) | 74(2) |
| C(24A) | 2015(4) | 2871(9)  | 1840(6) | 78(2) |
| C(25A) | 2498(5) | 2358(12) | 1761(7) | 91(3) |
| C(26A) | 2660(3) | 1517(6)  | 2434(5) | 49(2) |
| O(1B)  | 2459(2) | 2459(3)  | 3260(3) | 29(1) |
| C(23B) | 2210(4) | 1646(6)  | 2649(4) | 49(2) |
| C(24B) | 2365(5) | 1855(7)  | 1913(6) | 73(2) |
| C(25B) | 2511(4) | 3017(6)  | 1997(4) | 47(2) |
| C(26B) | 2446(3) | 3378(5)  | 2775(4) | 38(1) |

---

**Table S18.** Bond lengths [Å] and angles [°] for **3**.

|              |           |               |          |
|--------------|-----------|---------------|----------|
| Th(1)-N(2)#1 | 2.628(2)  | C(10)-C(11)   | 1.370(5) |
| Th(1)-N(2)   | 2.628(2)  | C(11)-C(12)   | 1.376(4) |
| Th(1)-N(1)#1 | 2.631(2)  | C(13)-C(17)   | 1.388(4) |
| Th(1)-N(1)   | 2.631(2)  | C(13)-C(18)   | 1.486(4) |
| Th(1)-S(1)   | 2.8428(6) | C(14)-C(15)   | 1.382(3) |
| Th(1)-S(1)#1 | 2.8428(6) | C(14)-H(14)   | 0.9500   |
| Th(1)-S(2)#1 | 2.8730(6) | C(15)-C(16)   | 1.383(4) |
| Th(1)-S(2)   | 2.8730(6) | C(15)-H(15)   | 0.9500   |
| S(1)-C(1)    | 1.754(3)  | C(16)-C(17)   | 1.381(4) |
| S(2)-C(7)    | 1.755(3)  | C(16)-H(16)   | 0.9500   |
| F(1)-C(2)    | 1.339(3)  | C(17)-H(17)   | 0.9500   |
| F(2)-C(3)    | 1.340(3)  | C(18)-C(22)   | 1.392(4) |
| F(3)-C(4)    | 1.337(3)  | C(19)-C(20)   | 1.385(4) |
| F(4)-C(5)    | 1.343(3)  | C(19)-H(19)   | 0.9500   |
| F(5)-C(6)    | 1.348(3)  | C(20)-C(21)   | 1.377(4) |
| F(6)-C(8)    | 1.344(3)  | C(20)-H(20)   | 0.9500   |
| F(7)-C(9)    | 1.345(4)  | C(21)-C(22)   | 1.375(4) |
| F(8)-C(10)   | 1.342(3)  | C(21)-H(21)   | 0.9500   |
| F(9)-C(11)   | 1.341(3)  | C(22)-H(22)   | 0.9500   |
| F(10)-C(12)  | 1.352(3)  | O(1A)-C(23A)  | 1.406(6) |
| N(1)-C(14)   | 1.348(3)  | O(1A)-C(26A)  | 1.419(6) |
| N(1)-C(13)   | 1.357(3)  | C(23A)-C(24A) | 1.484(8) |
| N(2)-C(19)   | 1.351(3)  | C(23A)-H(23A) | 0.9900   |
| N(2)-C(18)   | 1.354(3)  | C(23A)-H(23B) | 0.9900   |
| C(1)-C(2)    | 1.393(4)  | C(24A)-C(25A) | 1.478(9) |
| C(1)-C(6)    | 1.397(3)  | C(24A)-H(24A) | 0.9900   |
| C(2)-C(3)    | 1.383(4)  | C(24A)-H(24B) | 0.9900   |
| C(3)-C(4)    | 1.379(4)  | C(25A)-C(26A) | 1.497(8) |
| C(4)-C(5)    | 1.379(4)  | C(25A)-H(25A) | 0.9900   |
| C(5)-C(6)    | 1.375(4)  | C(25A)-H(25B) | 0.9900   |
| C(7)-C(8)    | 1.383(4)  | C(26A)-H(26A) | 0.9900   |
| C(7)-C(12)   | 1.391(4)  | C(26A)-H(26B) | 0.9900   |
| C(8)-C(9)    | 1.386(4)  | O(1B)-C(26B)  | 1.420(6) |
| C(9)-C(10)   | 1.378(5)  | O(1B)-C(23B)  | 1.420(6) |

|                     |             |                  |            |
|---------------------|-------------|------------------|------------|
| C(23B)-C(24B)       | 1.504(8)    | C(25B)-C(26B)    | 1.488(7)   |
| C(23B)-H(23C)       | 0.9900      | C(25B)-H(25C)    | 0.9900     |
| C(23B)-H(23D)       | 0.9900      | C(25B)-H(25D)    | 0.9900     |
| C(24B)-C(25B)       | 1.505(9)    | C(26B)-H(26C)    | 0.9900     |
| C(24B)-H(24C)       | 0.9900      | C(26B)-H(26D)    | 0.9900     |
| C(24B)-H(24D)       | 0.9900      |                  |            |
| N(2)#1-Th(1)-N(2)   | 115.53(10)  | C(7)-S(2)-Th(1)  | 111.81(9)  |
| N(2)#1-Th(1)-N(1)#1 | 62.42(7)    | C(14)-N(1)-C(13) | 118.0(2)   |
| N(2)-Th(1)-N(1)#1   | 149.80(6)   | C(14)-N(1)-Th(1) | 120.53(16) |
| N(2)#1-Th(1)-N(1)   | 149.80(6)   | C(13)-N(1)-Th(1) | 121.44(16) |
| N(2)-Th(1)-N(1)     | 62.42(7)    | C(19)-N(2)-C(18) | 117.9(2)   |
| N(1)#1-Th(1)-N(1)   | 135.80(9)   | C(19)-N(2)-Th(1) | 120.61(17) |
| N(2)#1-Th(1)-S(1)   | 136.03(5)   | C(18)-N(2)-Th(1) | 121.37(16) |
| N(2)-Th(1)-S(1)     | 81.62(5)    | C(2)-C(1)-C(6)   | 115.4(2)   |
| N(1)#1-Th(1)-S(1)   | 82.45(5)    | C(2)-C(1)-S(1)   | 122.09(19) |
| N(1)-Th(1)-S(1)     | 74.12(5)    | C(6)-C(1)-S(1)   | 122.4(2)   |
| N(2)#1-Th(1)-S(1)#1 | 81.63(5)    | F(1)-C(2)-C(3)   | 117.5(2)   |
| N(2)-Th(1)-S(1)#1   | 136.03(5)   | F(1)-C(2)-C(1)   | 119.8(2)   |
| N(1)#1-Th(1)-S(1)#1 | 74.13(5)    | C(3)-C(2)-C(1)   | 122.8(2)   |
| N(1)-Th(1)-S(1)#1   | 82.45(5)    | F(2)-C(3)-C(4)   | 119.8(2)   |
| S(1)-Th(1)-S(1)#1   | 114.89(3)   | F(2)-C(3)-C(2)   | 120.4(2)   |
| N(2)#1-Th(1)-S(2)#1 | 77.46(5)    | C(4)-C(3)-C(2)   | 119.8(3)   |
| N(2)-Th(1)-S(2)#1   | 75.88(5)    | F(3)-C(4)-C(5)   | 120.1(2)   |
| N(1)#1-Th(1)-S(2)#1 | 74.36(5)    | F(3)-C(4)-C(3)   | 120.8(3)   |
| N(1)-Th(1)-S(2)#1   | 126.48(5)   | C(5)-C(4)-C(3)   | 119.1(2)   |
| S(1)-Th(1)-S(2)#1   | 67.691(18)  | F(4)-C(5)-C(6)   | 120.2(2)   |
| S(1)#1-Th(1)-S(2)#1 | 147.633(18) | F(4)-C(5)-C(4)   | 119.5(2)   |
| N(2)#1-Th(1)-S(2)   | 75.89(5)    | C(6)-C(5)-C(4)   | 120.3(2)   |
| N(2)-Th(1)-S(2)     | 77.46(5)    | F(5)-C(6)-C(5)   | 117.7(2)   |
| N(1)#1-Th(1)-S(2)   | 126.49(5)   | F(5)-C(6)-C(1)   | 119.8(2)   |
| N(1)-Th(1)-S(2)     | 74.37(5)    | C(5)-C(6)-C(1)   | 122.6(2)   |
| S(1)-Th(1)-S(2)     | 147.633(18) | C(8)-C(7)-C(12)  | 116.1(3)   |
| S(1)#1-Th(1)-S(2)   | 67.691(18)  | C(8)-C(7)-S(2)   | 121.9(2)   |
| S(2)#1-Th(1)-S(2)   | 128.80(3)   | C(12)-C(7)-S(2)  | 121.9(2)   |
| C(1)-S(1)-Th(1)     | 113.42(8)   | F(6)-C(8)-C(7)   | 120.4(2)   |

|                   |          |                      |          |
|-------------------|----------|----------------------|----------|
| F(6)-C(8)-C(9)    | 117.6(3) | C(21)-C(20)-H(20)    | 120.8    |
| C(7)-C(8)-C(9)    | 122.0(3) | C(19)-C(20)-H(20)    | 120.8    |
| F(7)-C(9)-C(10)   | 119.7(3) | C(22)-C(21)-C(20)    | 119.7(3) |
| F(7)-C(9)-C(8)    | 120.4(3) | C(22)-C(21)-H(21)    | 120.2    |
| C(10)-C(9)-C(8)   | 119.9(3) | C(20)-C(21)-H(21)    | 120.2    |
| F(8)-C(10)-C(11)  | 121.0(3) | C(21)-C(22)-C(18)    | 119.4(3) |
| F(8)-C(10)-C(9)   | 119.6(3) | C(21)-C(22)-H(22)    | 120.3    |
| C(11)-C(10)-C(9)  | 119.4(3) | C(18)-C(22)-H(22)    | 120.3    |
| F(9)-C(11)-C(10)  | 119.8(3) | C(23A)-O(1A)-C(26A)  | 105.1(5) |
| F(9)-C(11)-C(12)  | 120.4(3) | O(1A)-C(23A)-C(24A)  | 107.8(5) |
| C(10)-C(11)-C(12) | 119.8(3) | O(1A)-C(23A)-H(23A)  | 110.2    |
| F(10)-C(12)-C(11) | 117.5(3) | C(24A)-C(23A)-H(23A) | 110.2    |
| F(10)-C(12)-C(7)  | 119.8(3) | O(1A)-C(23A)-H(23B)  | 110.2    |
| C(11)-C(12)-C(7)  | 122.7(3) | C(24A)-C(23A)-H(23B) | 110.2    |
| N(1)-C(13)-C(17)  | 121.6(2) | H(23A)-C(23A)-H(23B) | 108.5    |
| N(1)-C(13)-C(18)  | 117.1(2) | C(25A)-C(24A)-C(23A) | 105.3(5) |
| C(17)-C(13)-C(18) | 121.3(2) | C(25A)-C(24A)-H(24A) | 110.7    |
| N(1)-C(14)-C(15)  | 123.2(2) | C(23A)-C(24A)-H(24A) | 110.7    |
| N(1)-C(14)-H(14)  | 118.4    | C(25A)-C(24A)-H(24B) | 110.7    |
| C(15)-C(14)-H(14) | 118.4    | C(23A)-C(24A)-H(24B) | 110.7    |
| C(14)-C(15)-C(16) | 118.3(3) | H(24A)-C(24A)-H(24B) | 108.8    |
| C(14)-C(15)-H(15) | 120.8    | C(24A)-C(25A)-C(26A) | 102.8(5) |
| C(16)-C(15)-H(15) | 120.8    | C(24A)-C(25A)-H(25A) | 111.2    |
| C(17)-C(16)-C(15) | 119.4(3) | C(26A)-C(25A)-H(25A) | 111.2    |
| C(17)-C(16)-H(16) | 120.3    | C(24A)-C(25A)-H(25B) | 111.2    |
| C(15)-C(16)-H(16) | 120.3    | C(26A)-C(25A)-H(25B) | 111.2    |
| C(16)-C(17)-C(13) | 119.4(2) | H(25A)-C(25A)-H(25B) | 109.1    |
| C(16)-C(17)-H(17) | 120.3    | O(1A)-C(26A)-C(25A)  | 104.7(6) |
| C(13)-C(17)-H(17) | 120.3    | O(1A)-C(26A)-H(26A)  | 110.8    |
| N(2)-C(18)-C(22)  | 121.6(2) | C(25A)-C(26A)-H(26A) | 110.8    |
| N(2)-C(18)-C(13)  | 117.2(2) | O(1A)-C(26A)-H(26B)  | 110.8    |
| C(22)-C(18)-C(13) | 121.2(2) | C(25A)-C(26A)-H(26B) | 110.8    |
| N(2)-C(19)-C(20)  | 123.0(3) | H(26A)-C(26A)-H(26B) | 108.9    |
| N(2)-C(19)-H(19)  | 118.5    | C(26B)-O(1B)-C(23B)  | 105.1(5) |
| C(20)-C(19)-H(19) | 118.5    | O(1B)-C(23B)-C(24B)  | 107.2(5) |
| C(21)-C(20)-C(19) | 118.4(3) | O(1B)-C(23B)-H(23C)  | 110.3    |

|                      |          |                      |          |
|----------------------|----------|----------------------|----------|
| C(24B)-C(23B)-H(23C) | 110.3    | C(26B)-C(25B)-H(25C) | 110.7    |
| O(1B)-C(23B)-H(23D)  | 110.3    | C(24B)-C(25B)-H(25C) | 110.7    |
| C(24B)-C(23B)-H(23D) | 110.3    | C(26B)-C(25B)-H(25D) | 110.7    |
| H(23C)-C(23B)-H(23D) | 108.5    | C(24B)-C(25B)-H(25D) | 110.7    |
| C(23B)-C(24B)-C(25B) | 103.6(5) | H(25C)-C(25B)-H(25D) | 108.8    |
| C(23B)-C(24B)-H(24C) | 111.0    | O(1B)-C(26B)-C(25B)  | 107.2(5) |
| C(25B)-C(24B)-H(24C) | 111.0    | O(1B)-C(26B)-H(26C)  | 110.3    |
| C(23B)-C(24B)-H(24D) | 111.0    | C(25B)-C(26B)-H(26C) | 110.3    |
| C(25B)-C(24B)-H(24D) | 111.0    | O(1B)-C(26B)-H(26D)  | 110.3    |
| H(24C)-C(24B)-H(24D) | 109.0    | C(25B)-C(26B)-H(26D) | 110.3    |
| C(26B)-C(25B)-C(24B) | 105.4(5) | H(26C)-C(26B)-H(26D) | 108.5    |

---

Symmetry transformations used to generate equivalent atoms: #1 -x+1,y,-z+3/2

**Table S19.** Anisotropic displacement parameters ( $\text{\AA}^2 \times 10^3$ ) for **3**.The anisotropic displacement factor exponent takes the form:  $-2\pi^2 [ h^2 a^{*2}U^{11} + \dots + 2 h k a^* b^* U^{12} ]$ 

|       | U <sup>11</sup> | U <sup>22</sup> | U <sup>33</sup> | U <sup>23</sup> | U <sup>13</sup> | U <sup>12</sup> |
|-------|-----------------|-----------------|-----------------|-----------------|-----------------|-----------------|
| Th(1) | 12(1)           | 21(1)           | 9(1)            | 0               | 3(1)            | 0               |
| S(1)  | 17(1)           | 26(1)           | 14(1)           | -4(1)           | 6(1)            | -5(1)           |
| S(2)  | 21(1)           | 29(1)           | 16(1)           | 6(1)            | 8(1)            | 2(1)            |
| F(1)  | 20(1)           | 34(1)           | 17(1)           | 2(1)            | 2(1)            | 1(1)            |
| F(2)  | 32(1)           | 26(1)           | 34(1)           | -2(1)           | 9(1)            | 7(1)            |
| F(3)  | 28(1)           | 33(1)           | 34(1)           | -17(1)          | 6(1)            | -3(1)           |
| F(4)  | 19(1)           | 39(1)           | 23(1)           | -10(1)          | -2(1)           | 1(1)            |
| F(5)  | 20(1)           | 28(1)           | 24(1)           | -4(1)           | 4(1)            | 4(1)            |
| F(6)  | 32(1)           | 40(1)           | 20(1)           | -1(1)           | 10(1)           | 10(1)           |
| F(7)  | 36(1)           | 86(2)           | 18(1)           | 7(1)            | 6(1)            | 21(1)           |
| F(8)  | 46(1)           | 87(2)           | 40(1)           | 36(1)           | 20(1)           | 42(1)           |
| F(9)  | 62(1)           | 42(1)           | 62(1)           | 24(1)           | 44(1)           | 31(1)           |
| F(10) | 43(1)           | 32(1)           | 36(1)           | 2(1)            | 24(1)           | 3(1)            |
| N(1)  | 16(1)           | 27(1)           | 12(1)           | 0(1)            | 6(1)            | 1(1)            |
| N(2)  | 17(1)           | 28(1)           | 14(1)           | 1(1)            | 7(1)            | 4(1)            |
| C(1)  | 16(1)           | 27(1)           | 15(1)           | -2(1)           | 6(1)            | -3(1)           |
| C(2)  | 16(1)           | 30(1)           | 14(1)           | 0(1)            | 4(1)            | -2(1)           |
| C(3)  | 23(1)           | 24(1)           | 24(1)           | -2(1)           | 11(1)           | 2(1)            |
| C(4)  | 22(1)           | 27(1)           | 23(1)           | -9(1)           | 8(1)            | -4(1)           |
| C(5)  | 14(1)           | 34(2)           | 16(1)           | -5(1)           | 2(1)            | -1(1)           |
| C(6)  | 16(1)           | 25(1)           | 19(1)           | -3(1)           | 7(1)            | 1(1)            |
| C(7)  | 24(1)           | 29(1)           | 21(1)           | 9(1)            | 14(1)           | 7(1)            |
| C(8)  | 24(1)           | 38(2)           | 20(1)           | 8(1)            | 11(1)           | 11(1)           |
| C(9)  | 28(2)           | 60(2)           | 18(1)           | 12(1)           | 10(1)           | 16(1)           |
| C(10) | 31(2)           | 60(2)           | 32(2)           | 28(2)           | 17(1)           | 25(2)           |
| C(11) | 40(2)           | 38(2)           | 41(2)           | 20(1)           | 29(2)           | 21(1)           |
| C(12) | 35(2)           | 33(2)           | 28(1)           | 9(1)            | 21(1)           | 6(1)            |
| C(13) | 15(1)           | 30(1)           | 13(1)           | 1(1)            | 5(1)            | 3(1)            |
| C(14) | 18(1)           | 30(1)           | 15(1)           | -2(1)           | 5(1)            | 2(1)            |
| C(15) | 21(1)           | 36(2)           | 17(1)           | -7(1)           | 7(1)            | 1(1)            |
| C(16) | 21(1)           | 53(2)           | 17(1)           | -10(1)          | 5(1)            | 4(1)            |



|        |       |        |       |        |       |        |
|--------|-------|--------|-------|--------|-------|--------|
| C(17)  | 17(1) | 47(2)  | 14(1) | -3(1)  | 1(1)  | 9(1)   |
| C(18)  | 16(1) | 29(1)  | 15(1) | 4(1)   | 6(1)  | 1(1)   |
| C(19)  | 21(1) | 29(1)  | 20(1) | 1(1)   | 10(1) | 3(1)   |
| C(20)  | 27(1) | 28(1)  | 31(2) | 3(1)   | 12(1) | 8(1)   |
| C(21)  | 23(1) | 36(2)  | 34(2) | 7(1)   | 7(1)  | 14(1)  |
| C(22)  | 19(1) | 34(2)  | 23(1) | 1(1)   | 3(1)  | 3(1)   |
| O(1A)  | 44(3) | 106(5) | 25(3) | 15(3)  | 11(2) | 39(3)  |
| C(23A) | 61(5) | 116(6) | 47(4) | 6(4)   | 23(4) | 45(5)  |
| C(24A) | 66(5) | 114(6) | 65(5) | 51(4)  | 37(4) | 38(4)  |
| C(25A) | 82(6) | 143(8) | 59(5) | 40(6)  | 41(5) | 36(6)  |
| C(26A) | 48(4) | 46(4)  | 51(4) | -20(3) | 20(3) | 13(3)  |
| O(1B)  | 25(2) | 39(3)  | 17(2) | -1(2)  | 1(2)  | 5(2)   |
| C(23B) | 57(4) | 62(4)  | 30(3) | -13(3) | 18(3) | -26(4) |
| C(24B) | 87(5) | 84(5)  | 63(5) | -5(4)  | 47(4) | -35(4) |
| C(25B) | 50(4) | 67(5)  | 29(3) | 11(3)  | 21(3) | 6(4)   |
| C(26B) | 47(3) | 39(3)  | 32(3) | 10(3)  | 21(3) | 14(3)  |

---

**Table S20.** Hydrogen coordinates ( $\times 10^4$ ) and isotropic displacement parameters ( $\text{\AA}^2 \times 10^{-3}$ ) for **3**.

|        | x    | y    | z    | U(eq) |
|--------|------|------|------|-------|
| H(14)  | 4854 | -198 | 6099 | 26    |
| H(15)  | 4346 | -913 | 4760 | 30    |
| H(16)  | 3531 | -43  | 3836 | 37    |
| H(17)  | 3258 | 1530 | 4281 | 33    |
| H(19)  | 4284 | 4213 | 7280 | 27    |
| H(20)  | 3484 | 5180 | 6487 | 34    |
| H(21)  | 2825 | 4448 | 5226 | 39    |
| H(22)  | 3005 | 2812 | 4756 | 32    |
| H(23A) | 2039 | 3169 | 3025 | 89    |
| H(23B) | 1719 | 2087 | 2613 | 89    |
| H(24A) | 1661 | 2632 | 1379 | 94    |
| H(24B) | 2040 | 3653 | 1811 | 94    |
| H(25A) | 2806 | 2870 | 1871 | 109   |
| H(25B) | 2391 | 2044 | 1189 | 109   |
| H(26A) | 2439 | 864  | 2213 | 58    |
| H(26B) | 3062 | 1343 | 2638 | 58    |
| H(23C) | 1799 | 1657 | 2455 | 59    |
| H(23D) | 2350 | 941  | 2902 | 59    |
| H(24C) | 2048 | 1704 | 1363 | 87    |
| H(24D) | 2689 | 1417 | 1957 | 87    |
| H(25C) | 2899 | 3125 | 2059 | 57    |
| H(25D) | 2255 | 3413 | 1491 | 57    |
| H(26C) | 2754 | 3865 | 3110 | 45    |
| H(26D) | 2087 | 3758 | 2617 | 45    |

**Table S21.** Torsion angles [°] for **3**.

|                       |           |                         |            |
|-----------------------|-----------|-------------------------|------------|
| Th(1)-S(1)-C(1)-C(2)  | 84.6(2)   | F(6)-C(8)-C(9)-C(10)    | -179.8(3)  |
| Th(1)-S(1)-C(1)-C(6)  | -98.5(2)  | C(7)-C(8)-C(9)-C(10)    | 1.5(5)     |
| C(6)-C(1)-C(2)-F(1)   | -177.7(2) | F(7)-C(9)-C(10)-F(8)    | -0.6(5)    |
| S(1)-C(1)-C(2)-F(1)   | -0.6(3)   | C(8)-C(9)-C(10)-F(8)    | 179.9(3)   |
| C(6)-C(1)-C(2)-C(3)   | 1.4(4)    | F(7)-C(9)-C(10)-C(11)   | 179.4(3)   |
| S(1)-C(1)-C(2)-C(3)   | 178.5(2)  | C(8)-C(9)-C(10)-C(11)   | -0.1(5)    |
| F(1)-C(2)-C(3)-F(2)   | -0.2(4)   | F(8)-C(10)-C(11)-F(9)   | -0.9(5)    |
| C(1)-C(2)-C(3)-F(2)   | -179.3(2) | C(9)-C(10)-C(11)-F(9)   | 179.1(3)   |
| F(1)-C(2)-C(3)-C(4)   | 178.4(2)  | F(8)-C(10)-C(11)-C(12)  | 179.3(3)   |
| C(1)-C(2)-C(3)-C(4)   | -0.7(4)   | C(9)-C(10)-C(11)-C(12)  | -0.7(5)    |
| F(2)-C(3)-C(4)-F(3)   | 0.3(4)    | F(9)-C(11)-C(12)-F(10)  | -0.2(4)    |
| C(2)-C(3)-C(4)-F(3)   | -178.4(2) | C(10)-C(11)-C(12)-F(10) | 179.6(3)   |
| F(2)-C(3)-C(4)-C(5)   | 178.7(2)  | F(9)-C(11)-C(12)-C(7)   | -179.7(3)  |
| C(2)-C(3)-C(4)-C(5)   | 0.1(4)    | C(10)-C(11)-C(12)-C(7)  | 0.1(5)     |
| F(3)-C(4)-C(5)-F(4)   | -1.5(4)   | C(8)-C(7)-C(12)-F(10)   | -178.3(2)  |
| C(3)-C(4)-C(5)-F(4)   | -179.9(2) | S(2)-C(7)-C(12)-F(10)   | -1.1(4)    |
| F(3)-C(4)-C(5)-C(6)   | 178.2(2)  | C(8)-C(7)-C(12)-C(11)   | 1.2(4)     |
| C(3)-C(4)-C(5)-C(6)   | -0.3(4)   | S(2)-C(7)-C(12)-C(11)   | 178.4(2)   |
| F(4)-C(5)-C(6)-F(5)   | 1.5(4)    | C(14)-N(1)-C(13)-C(17)  | -0.9(4)    |
| C(4)-C(5)-C(6)-F(5)   | -178.2(2) | Th(1)-N(1)-C(13)-C(17)  | 178.3(2)   |
| F(4)-C(5)-C(6)-C(1)   | -179.3(2) | C(14)-N(1)-C(13)-C(18)  | -178.6(2)  |
| C(4)-C(5)-C(6)-C(1)   | 1.1(4)    | Th(1)-N(1)-C(13)-C(18)  | 0.7(3)     |
| C(2)-C(1)-C(6)-F(5)   | 177.7(2)  | C(13)-N(1)-C(14)-C(15)  | 1.1(4)     |
| S(1)-C(1)-C(6)-F(5)   | 0.6(3)    | Th(1)-N(1)-C(14)-C(15)  | -178.2(2)  |
| C(2)-C(1)-C(6)-C(5)   | -1.6(4)   | N(1)-C(14)-C(15)-C(16)  | -0.8(4)    |
| S(1)-C(1)-C(6)-C(5)   | -178.7(2) | C(14)-C(15)-C(16)-C(17) | 0.3(4)     |
| Th(1)-S(2)-C(7)-C(8)  | -100.4(2) | C(15)-C(16)-C(17)-C(13) | -0.2(5)    |
| Th(1)-S(2)-C(7)-C(12) | 82.5(2)   | N(1)-C(13)-C(17)-C(16)  | 0.5(4)     |
| C(12)-C(7)-C(8)-F(6)  | 179.3(2)  | C(18)-C(13)-C(17)-C(16) | 178.0(3)   |
| S(2)-C(7)-C(8)-F(6)   | 2.1(4)    | C(19)-N(2)-C(18)-C(22)  | -3.8(4)    |
| C(12)-C(7)-C(8)-C(9)  | -2.0(4)   | Th(1)-N(2)-C(18)-C(22)  | 172.73(19) |
| S(2)-C(7)-C(8)-C(9)   | -179.2(2) | C(19)-N(2)-C(18)-C(13)  | 175.3(2)   |
| F(6)-C(8)-C(9)-F(7)   | 0.7(4)    | Th(1)-N(2)-C(18)-C(13)  | -8.2(3)    |
| C(7)-C(8)-C(9)-F(7)   | -177.9(3) | N(1)-C(13)-C(18)-N(2)   | 4.9(3)     |

|                         |           |                             |           |
|-------------------------|-----------|-----------------------------|-----------|
| C(17)-C(13)-C(18)-N(2)  | -172.8(2) | C(26A)-O(1A)-C(23A)-C(24A)  | -27.6(12) |
| N(1)-C(13)-C(18)-C(22)  | -176.1(2) | O(1A)-C(23A)-C(24A)-C(25A)  | 5.8(15)   |
| C(17)-C(13)-C(18)-C(22) | 6.3(4)    | C(23A)-C(24A)-C(25A)-C(26A) | 16.8(14)  |
| C(18)-N(2)-C(19)-C(20)  | 2.0(4)    | C(23A)-O(1A)-C(26A)-C(25A)  | 38.4(11)  |
| Th(1)-N(2)-C(19)-C(20)  | -174.5(2) | C(24A)-C(25A)-C(26A)-O(1A)  | -33.9(13) |
| N(2)-C(19)-C(20)-C(21)  | 0.8(4)    | C(26B)-O(1B)-C(23B)-C(24B)  | 33.9(9)   |
| C(19)-C(20)-C(21)-C(22) | -1.9(4)   | O(1B)-C(23B)-C(24B)-C(25B)  | -21.5(11) |
| C(20)-C(21)-C(22)-C(18) | 0.2(5)    | C(23B)-C(24B)-C(25B)-C(26B) | 1.6(11)   |
| N(2)-C(18)-C(22)-C(21)  | 2.7(4)    | C(23B)-O(1B)-C(26B)-C(25B)  | -32.7(8)  |
| C(13)-C(18)-C(22)-C(21) | -176.3(3) | C(24B)-C(25B)-C(26B)-O(1B)  | 18.8(9)   |

---

Symmetry transformations used to generate equivalent atoms: #1 -x+1,y,-z+3/2

**Table S22.** Hydrogen bonds [ $\text{\AA}$  and  $^\circ$ ] for **3**.

| D-H...A                | d(D-H) | d(H...A) | d(D...A)  | $\angle(\text{DHA})$ |
|------------------------|--------|----------|-----------|----------------------|
| C(14)-H(14)...S(1)#1   | 0.95   | 2.77     | 3.455(3)  | 129.3                |
| C(14)-H(14)...F(1)#1   | 0.95   | 2.40     | 3.285(3)  | 154.2                |
| C(15)-H(15)...F(6)#2   | 0.95   | 2.58     | 3.296(3)  | 132.6                |
| C(19)-H(19)...S(2)#1   | 0.95   | 2.77     | 3.283(3)  | 114.5                |
| C(23A)-H(23A)...F(5)#3 | 0.99   | 2.43     | 3.397(10) | 166.9                |
| C(25A)-H(25B)...F(3)#4 | 0.99   | 2.55     | 3.427(13) | 147.0                |
| C(25B)-H(25D)...F(4)#4 | 0.99   | 2.61     | 3.385(7)  | 135.2                |
| C(26B)-H(26C)...F(8)   | 0.99   | 2.45     | 3.392(8)  | 158.8                |

Symmetry transformations used to generate equivalent atoms:

#1  $-x+1, y, -z+3/2$  #2  $-x+1, -y, -z+1$  #3  $-x+1/2, -y+1/2, -z+1$  #4  $-x+1/2, y+1/2, -z+1/2$

**Table S23.** Crystal data and structure refinement for **4**.

|                                   |                                                                                                  |                   |
|-----------------------------------|--------------------------------------------------------------------------------------------------|-------------------|
| Identification code               | ThSeCF-bipyTHF_C2c                                                                               |                   |
| Empirical formula                 | C <sub>52</sub> H <sub>32</sub> F <sub>20</sub> N <sub>4</sub> O <sub>2</sub> Se <sub>4</sub> Th |                   |
| Formula weight                    | 1672.69                                                                                          |                   |
| Temperature                       | 100(2) K                                                                                         |                   |
| Wavelength                        | 0.71073 Å                                                                                        |                   |
| Crystal system                    | Monoclinic                                                                                       |                   |
| Space group                       | C2/c                                                                                             |                   |
| Unit cell dimensions              | a = 26.3395(13) Å                                                                                | α = 90°.          |
|                                   | b = 12.7499(6) Å                                                                                 | β = 114.2965(9)°. |
|                                   | c = 17.3963(8) Å                                                                                 | γ = 90°.          |
| Volume                            | 5324.7(4) Å <sup>3</sup>                                                                         |                   |
| Z                                 | 4                                                                                                |                   |
| Density (calculated)              | 2.087 Mg/m <sup>3</sup>                                                                          |                   |
| Absorption coefficient            | 5.652 mm <sup>-1</sup>                                                                           |                   |
| F(000)                            | 3176                                                                                             |                   |
| Crystal size                      | 0.300 x 0.250 x 0.150 mm <sup>3</sup>                                                            |                   |
| Theta range for data collection   | 1.697 to 30.517°.                                                                                |                   |
| Index ranges                      | -37 ≤ h ≤ 37, -18 ≤ k ≤ 18, -24 ≤ l ≤ 24                                                         |                   |
| Reflections collected             | 31323                                                                                            |                   |
| Independent reflections           | 8110 [R(int) = 0.0357]                                                                           |                   |
| Completeness to theta = 25.242°   | 100.0 %                                                                                          |                   |
| Absorption correction             | Semi-empirical from equivalents                                                                  |                   |
| Max. and min. transmission        | 0.7461 and 0.5608                                                                                |                   |
| Refinement method                 | Full-matrix least-squares on F <sup>2</sup>                                                      |                   |
| Data / restraints / parameters    | 8110 / 805 / 420                                                                                 |                   |
| Goodness-of-fit on F <sup>2</sup> | 1.005                                                                                            |                   |
| Final R indices [I > 2σ(I)]       | R1 = 0.0271, wR2 = 0.0605                                                                        |                   |
| R indices (all data)              | R1 = 0.0358, wR2 = 0.0635                                                                        |                   |
| Extinction coefficient            | n/a                                                                                              |                   |
| Largest diff. peak and hole       | 1.423 and -1.473 e.Å <sup>-3</sup>                                                               |                   |

**Table S24.** Atomic coordinates ( $\times 10^4$ ) and equivalent isotropic displacement parameters ( $\text{\AA}^2 \times 10^3$ ) for **4**. U(eq) is defined as one third of the trace of the orthogonalized  $U^{ij}$  tensor.

|       | x       | y        | z       | U(eq) |
|-------|---------|----------|---------|-------|
| Th(1) | 5000    | 1842(1)  | 7500    | 19(1) |
| Se(1) | 4106(1) | 637(1)   | 7726(1) | 25(1) |
| Se(2) | 5441(1) | 2827(1)  | 6321(1) | 27(1) |
| F(1)  | 4605(1) | -1568(2) | 7795(1) | 36(1) |
| F(2)  | 4252(1) | -3168(1) | 6705(1) | 45(1) |
| F(3)  | 3312(1) | -2967(2) | 5254(1) | 46(1) |
| F(4)  | 2735(1) | -1139(2) | 4906(1) | 38(1) |
| F(5)  | 3068(1) | 457(1)   | 6004(1) | 32(1) |
| F(6)  | 4736(1) | 1963(2)  | 4520(1) | 42(1) |
| F(7)  | 3886(1) | 2853(3)  | 3231(1) | 76(1) |
| F(8)  | 3525(1) | 4799(3)  | 3398(2) | 93(1) |
| F(9)  | 4020(1) | 5846(2)  | 4889(2) | 77(1) |
| F(10) | 4871(1) | 4982(2)  | 6177(1) | 50(1) |
| N(1)  | 4384(1) | 1052(2)  | 6018(1) | 24(1) |
| N(2)  | 4155(1) | 2962(2)  | 6500(1) | 26(1) |
| C(1)  | 3859(1) | -483(2)  | 6926(2) | 25(1) |
| C(2)  | 4144(1) | -1433(2) | 7078(2) | 28(1) |
| C(3)  | 3968(1) | -2265(2) | 6530(2) | 32(1) |
| C(4)  | 3490(1) | -2166(2) | 5792(2) | 33(1) |
| C(5)  | 3195(1) | -1238(2) | 5623(2) | 30(1) |
| C(6)  | 3379(1) | -423(2)  | 6190(2) | 26(1) |
| C(7)  | 4829(1) | 3433(3)  | 5400(2) | 33(1) |
| C(8)  | 4574(1) | 2924(3)  | 4632(2) | 38(1) |
| C(9)  | 4134(2) | 3382(4)  | 3960(2) | 55(1) |
| C(10) | 3952(2) | 4360(4)  | 4050(2) | 64(1) |
| C(11) | 4195(2) | 4882(3)  | 4793(3) | 57(1) |
| C(12) | 4634(2) | 4427(3)  | 5457(2) | 42(1) |
| C(13) | 3916(1) | 1542(2)  | 5485(2) | 26(1) |
| C(14) | 4522(1) | 138(2)   | 5761(2) | 27(1) |
| C(15) | 4215(1) | -309(3)  | 4981(2) | 32(1) |
| C(16) | 3740(1) | 200(3)   | 4445(2) | 37(1) |

|        |         |         |         |       |
|--------|---------|---------|---------|-------|
| C(17)  | 3585(1) | 1128(3) | 4697(2) | 35(1) |
| C(18)  | 3776(1) | 2554(2) | 5768(2) | 27(1) |
| C(19)  | 4059(1) | 3920(2) | 6735(2) | 30(1) |
| C(20)  | 3584(1) | 4497(3) | 6284(2) | 37(1) |
| C(21)  | 3187(1) | 4062(3) | 5556(2) | 40(1) |
| C(22)  | 3284(1) | 3091(3) | 5292(2) | 36(1) |
| O(1A)  | 2580(2) | 1974(5) | 3175(3) | 48(2) |
| C(23A) | 2110(4) | 2624(8) | 2751(4) | 62(2) |
| C(24A) | 2078(4) | 2835(7) | 1896(4) | 58(2) |
| C(25A) | 2451(5) | 2028(9) | 1772(5) | 68(3) |
| C(26A) | 2646(3) | 1359(6) | 2544(4) | 45(2) |
| O(1B)  | 2442(2) | 2326(4) | 3314(3) | 42(1) |
| C(23B) | 2236(3) | 1469(6) | 2748(4) | 50(2) |
| C(24B) | 2463(5) | 1641(6) | 2103(6) | 58(2) |
| C(25B) | 2456(5) | 2824(6) | 2020(5) | 63(2) |
| C(26B) | 2456(3) | 3212(5) | 2830(4) | 47(2) |

---



**Table S25.** Bond lengths [Å] and angles [°] for **4**.

|               |           |               |          |
|---------------|-----------|---------------|----------|
| Th(1)-N(2)    | 2.613(2)  | C(10)-C(11)   | 1.357(6) |
| Th(1)-N(2)#1  | 2.613(2)  | C(11)-C(12)   | 1.383(5) |
| Th(1)-N(1)    | 2.618(2)  | C(13)-C(17)   | 1.390(4) |
| Th(1)-N(1)#1  | 2.618(2)  | C(13)-C(18)   | 1.481(4) |
| Th(1)-Se(1)   | 2.9699(3) | C(14)-C(15)   | 1.386(4) |
| Th(1)-Se(1)#1 | 2.9699(3) | C(14)-H(14)   | 0.9500   |
| Th(1)-Se(2)   | 3.0155(3) | C(15)-C(16)   | 1.377(4) |
| Th(1)-Se(2)#1 | 3.0155(3) | C(15)-H(15)   | 0.9500   |
| Se(1)-C(1)    | 1.911(3)  | C(16)-C(17)   | 1.380(4) |
| Se(2)-C(7)    | 1.907(3)  | C(16)-H(16)   | 0.9500   |
| F(1)-C(2)     | 1.346(3)  | C(17)-H(17)   | 0.9500   |
| F(2)-C(3)     | 1.338(3)  | C(18)-C(22)   | 1.397(4) |
| F(3)-C(4)     | 1.334(3)  | C(19)-C(20)   | 1.382(4) |
| F(4)-C(5)     | 1.340(3)  | C(19)-H(19)   | 0.9500   |
| F(5)-C(6)     | 1.348(3)  | C(20)-C(21)   | 1.385(5) |
| F(6)-C(8)     | 1.339(4)  | C(20)-H(20)   | 0.9500   |
| F(7)-C(9)     | 1.345(5)  | C(21)-C(22)   | 1.380(5) |
| F(8)-C(10)    | 1.347(4)  | C(21)-H(21)   | 0.9500   |
| F(9)-C(11)    | 1.347(4)  | C(22)-H(22)   | 0.9500   |
| F(10)-C(12)   | 1.347(4)  | O(1A)-C(23A)  | 1.417(6) |
| N(1)-C(13)    | 1.352(3)  | O(1A)-C(26A)  | 1.416(6) |
| N(1)-C(14)    | 1.351(4)  | C(23A)-C(24A) | 1.480(7) |
| N(2)-C(19)    | 1.345(4)  | C(23A)-H(23A) | 0.9900   |
| N(2)-C(18)    | 1.357(4)  | C(23A)-H(23B) | 0.9900   |
| C(1)-C(6)     | 1.383(4)  | C(24A)-C(25A) | 1.498(9) |
| C(1)-C(2)     | 1.391(4)  | C(24A)-H(24A) | 0.9900   |
| C(2)-C(3)     | 1.373(4)  | C(24A)-H(24B) | 0.9900   |
| C(3)-C(4)     | 1.386(4)  | C(25A)-C(26A) | 1.492(8) |
| C(4)-C(5)     | 1.379(4)  | C(25A)-H(25A) | 0.9900   |
| C(5)-C(6)     | 1.378(4)  | C(25A)-H(25B) | 0.9900   |
| C(7)-C(12)    | 1.386(4)  | C(26A)-H(26A) | 0.9900   |
| C(7)-C(8)     | 1.385(5)  | C(26A)-H(26B) | 0.9900   |
| C(8)-C(9)     | 1.390(4)  | O(1B)-C(26B)  | 1.417(6) |
| C(9)-C(10)    | 1.368(6)  | O(1B)-C(23B)  | 1.420(6) |

|                       |             |                  |            |
|-----------------------|-------------|------------------|------------|
| C(23B)-C(24B)         | 1.489(8)    | C(25B)-C(26B)    | 1.494(7)   |
| C(23B)-H(23C)         | 0.9900      | C(25B)-H(25C)    | 0.9900     |
| C(23B)-H(23D)         | 0.9900      | C(25B)-H(25D)    | 0.9900     |
| C(24B)-C(25B)         | 1.515(9)    | C(26B)-H(26C)    | 0.9900     |
| C(24B)-H(24C)         | 0.9900      | C(26B)-H(26D)    | 0.9900     |
| C(24B)-H(24D)         | 0.9900      |                  |            |
| N(2)-Th(1)-N(2)#1     | 113.77(11)  | C(7)-Se(2)-Th(1) | 108.15(9)  |
| N(2)-Th(1)-N(1)       | 62.72(7)    | C(13)-N(1)-C(14) | 117.8(2)   |
| N(2)#1-Th(1)-N(1)     | 151.52(7)   | C(13)-N(1)-Th(1) | 121.22(18) |
| N(2)-Th(1)-N(1)#1     | 151.52(7)   | C(14)-N(1)-Th(1) | 120.98(17) |
| N(2)#1-Th(1)-N(1)#1   | 62.72(7)    | C(19)-N(2)-C(18) | 118.3(2)   |
| N(1)-Th(1)-N(1)#1     | 134.72(11)  | C(19)-N(2)-Th(1) | 120.65(18) |
| N(2)-Th(1)-Se(1)      | 82.32(5)    | C(18)-N(2)-Th(1) | 120.78(18) |
| N(2)#1-Th(1)-Se(1)    | 134.34(5)   | C(6)-C(1)-C(2)   | 116.1(3)   |
| N(1)-Th(1)-Se(1)      | 74.14(5)    | C(6)-C(1)-Se(1)  | 122.7(2)   |
| N(1)#1-Th(1)-Se(1)    | 82.82(5)    | C(2)-C(1)-Se(1)  | 121.2(2)   |
| N(2)-Th(1)-Se(1)#1    | 134.34(5)   | F(1)-C(2)-C(3)   | 117.5(3)   |
| N(2)#1-Th(1)-Se(1)#1  | 82.32(5)    | F(1)-C(2)-C(1)   | 119.8(3)   |
| N(1)-Th(1)-Se(1)#1    | 82.82(5)    | C(3)-C(2)-C(1)   | 122.7(3)   |
| N(1)#1-Th(1)-Se(1)#1  | 74.14(5)    | F(2)-C(3)-C(2)   | 120.7(3)   |
| Se(1)-Th(1)-Se(1)#1   | 117.697(12) | F(2)-C(3)-C(4)   | 120.0(3)   |
| N(2)-Th(1)-Se(2)      | 77.33(5)    | C(2)-C(3)-C(4)   | 119.4(3)   |
| N(2)#1-Th(1)-Se(2)    | 76.37(5)    | F(3)-C(4)-C(5)   | 120.1(3)   |
| N(1)-Th(1)-Se(2)      | 75.35(5)    | F(3)-C(4)-C(3)   | 120.3(3)   |
| N(1)#1-Th(1)-Se(2)    | 124.99(5)   | C(5)-C(4)-C(3)   | 119.6(3)   |
| Se(1)-Th(1)-Se(2)     | 148.611(7)  | F(4)-C(5)-C(6)   | 120.8(3)   |
| Se(1)#1-Th(1)-Se(2)   | 64.987(8)   | F(4)-C(5)-C(4)   | 119.7(3)   |
| N(2)-Th(1)-Se(2)#1    | 76.37(5)    | C(6)-C(5)-C(4)   | 119.5(3)   |
| N(2)#1-Th(1)-Se(2)#1  | 77.34(5)    | F(5)-C(6)-C(5)   | 117.1(2)   |
| N(1)-Th(1)-Se(2)#1    | 124.99(5)   | F(5)-C(6)-C(1)   | 120.2(2)   |
| N(1)#1-Th(1)-Se(2)#1  | 75.35(5)    | C(5)-C(6)-C(1)   | 122.7(3)   |
| Se(1)-Th(1)-Se(2)#1   | 64.986(8)   | C(12)-C(7)-C(8)  | 116.8(3)   |
| Se(1)#1-Th(1)-Se(2)#1 | 148.612(7)  | C(12)-C(7)-Se(2) | 121.3(3)   |
| Se(2)-Th(1)-Se(2)#1   | 130.783(12) | C(8)-C(7)-Se(2)  | 121.9(2)   |
| C(1)-Se(1)-Th(1)      | 109.95(8)   | F(6)-C(8)-C(7)   | 120.8(3)   |

|                   |          |                      |          |
|-------------------|----------|----------------------|----------|
| F(6)-C(8)-C(9)    | 117.8(3) | C(19)-C(20)-H(20)    | 120.9    |
| C(7)-C(8)-C(9)    | 121.4(3) | C(21)-C(20)-H(20)    | 120.9    |
| F(7)-C(9)-C(10)   | 120.5(3) | C(22)-C(21)-C(20)    | 119.3(3) |
| F(7)-C(9)-C(8)    | 119.7(4) | C(22)-C(21)-H(21)    | 120.3    |
| C(10)-C(9)-C(8)   | 119.7(4) | C(20)-C(21)-H(21)    | 120.3    |
| F(8)-C(10)-C(11)  | 120.1(4) | C(21)-C(22)-C(18)    | 119.7(3) |
| F(8)-C(10)-C(9)   | 119.5(4) | C(21)-C(22)-H(22)    | 120.1    |
| C(11)-C(10)-C(9)  | 120.4(3) | C(18)-C(22)-H(22)    | 120.1    |
| F(9)-C(11)-C(10)  | 120.9(3) | C(23A)-O(1A)-C(26A)  | 106.2(5) |
| F(9)-C(11)-C(12)  | 119.4(4) | O(1A)-C(23A)-C(24A)  | 107.8(5) |
| C(10)-C(11)-C(12) | 119.7(3) | O(1A)-C(23A)-H(23A)  | 110.1    |
| F(10)-C(12)-C(11) | 117.7(3) | C(24A)-C(23A)-H(23A) | 110.1    |
| F(10)-C(12)-C(7)  | 120.3(3) | O(1A)-C(23A)-H(23B)  | 110.1    |
| C(11)-C(12)-C(7)  | 122.0(4) | C(24A)-C(23A)-H(23B) | 110.1    |
| N(1)-C(13)-C(17)  | 121.7(3) | H(23A)-C(23A)-H(23B) | 108.5    |
| N(1)-C(13)-C(18)  | 117.1(2) | C(23A)-C(24A)-C(25A) | 104.5(5) |
| C(17)-C(13)-C(18) | 121.2(3) | C(23A)-C(24A)-H(24A) | 110.9    |
| N(1)-C(14)-C(15)  | 123.4(3) | C(25A)-C(24A)-H(24A) | 110.9    |
| N(1)-C(14)-H(14)  | 118.3    | C(23A)-C(24A)-H(24B) | 110.9    |
| C(15)-C(14)-H(14) | 118.3    | C(25A)-C(24A)-H(24B) | 110.9    |
| C(16)-C(15)-C(14) | 118.2(3) | H(24A)-C(24A)-H(24B) | 108.9    |
| C(16)-C(15)-H(15) | 120.9    | C(26A)-C(25A)-C(24A) | 105.4(5) |
| C(14)-C(15)-H(15) | 120.9    | C(26A)-C(25A)-H(25A) | 110.7    |
| C(15)-C(16)-C(17) | 119.6(3) | C(24A)-C(25A)-H(25A) | 110.7    |
| C(15)-C(16)-H(16) | 120.2    | C(26A)-C(25A)-H(25B) | 110.7    |
| C(17)-C(16)-H(16) | 120.2    | C(24A)-C(25A)-H(25B) | 110.7    |
| C(16)-C(17)-C(13) | 119.5(3) | H(25A)-C(25A)-H(25B) | 108.8    |
| C(16)-C(17)-H(17) | 120.3    | O(1A)-C(26A)-C(25A)  | 106.0(5) |
| C(13)-C(17)-H(17) | 120.3    | O(1A)-C(26A)-H(26A)  | 110.5    |
| N(2)-C(18)-C(22)  | 120.9(3) | C(25A)-C(26A)-H(26A) | 110.5    |
| N(2)-C(18)-C(13)  | 117.2(2) | O(1A)-C(26A)-H(26B)  | 110.5    |
| C(22)-C(18)-C(13) | 121.8(3) | C(25A)-C(26A)-H(26B) | 110.5    |
| N(2)-C(19)-C(20)  | 123.5(3) | H(26A)-C(26A)-H(26B) | 108.7    |
| N(2)-C(19)-H(19)  | 118.3    | C(26B)-O(1B)-C(23B)  | 107.4(5) |
| C(20)-C(19)-H(19) | 118.3    | O(1B)-C(23B)-C(24B)  | 104.5(5) |
| C(19)-C(20)-C(21) | 118.2(3) | O(1B)-C(23B)-H(23C)  | 110.9    |

|                      |          |                      |          |
|----------------------|----------|----------------------|----------|
| C(24B)-C(23B)-H(23C) | 110.9    | C(26B)-C(25B)-H(25C) | 110.9    |
| O(1B)-C(23B)-H(23D)  | 110.9    | C(24B)-C(25B)-H(25C) | 110.9    |
| C(24B)-C(23B)-H(23D) | 110.9    | C(26B)-C(25B)-H(25D) | 110.9    |
| H(23C)-C(23B)-H(23D) | 108.9    | C(24B)-C(25B)-H(25D) | 110.9    |
| C(23B)-C(24B)-C(25B) | 103.1(5) | H(25C)-C(25B)-H(25D) | 108.9    |
| C(23B)-C(24B)-H(24C) | 111.1    | O(1B)-C(26B)-C(25B)  | 107.8(5) |
| C(25B)-C(24B)-H(24C) | 111.1    | O(1B)-C(26B)-H(26C)  | 110.1    |
| C(23B)-C(24B)-H(24D) | 111.1    | C(25B)-C(26B)-H(26C) | 110.1    |
| C(25B)-C(24B)-H(24D) | 111.1    | O(1B)-C(26B)-H(26D)  | 110.1    |
| H(24C)-C(24B)-H(24D) | 109.1    | C(25B)-C(26B)-H(26D) | 110.1    |
| C(26B)-C(25B)-C(24B) | 104.1(5) | H(26C)-C(26B)-H(26D) | 108.5    |

---

Symmetry transformations used to generate equivalent atoms: #1 -x+1,y,-z+3/2

**Table S26.** Anisotropic displacement parameters ( $\text{\AA}^2 \times 10^3$ ) for **4**.The anisotropic displacement factor exponent takes the form:  $-2\pi^2 [ h^2 a^{*2}U^{11} + \dots + 2 h k a^* b^* U^{12} ]$ 

|       | U <sup>11</sup> | U <sup>22</sup> | U <sup>33</sup> | U <sup>23</sup> | U <sup>13</sup> | U <sup>12</sup> |
|-------|-----------------|-----------------|-----------------|-----------------|-----------------|-----------------|
| Th(1) | 13(1)           | 34(1)           | 9(1)            | 0               | 3(1)            | 0               |
| Se(1) | 19(1)           | 40(1)           | 15(1)           | -5(1)           | 7(1)            | -5(1)           |
| Se(2) | 25(1)           | 39(1)           | 16(1)           | 7(1)            | 9(1)            | 4(1)            |
| F(1)  | 28(1)           | 50(1)           | 24(1)           | 5(1)            | 5(1)            | 6(1)            |
| F(2)  | 44(1)           | 38(1)           | 50(1)           | 4(1)            | 16(1)           | 11(1)           |
| F(3)  | 41(1)           | 43(1)           | 48(1)           | -20(1)          | 12(1)           | -5(1)           |
| F(4)  | 27(1)           | 50(1)           | 26(1)           | -13(1)          | -2(1)           | 0(1)            |
| F(5)  | 23(1)           | 38(1)           | 26(1)           | -7(1)           | 3(1)            | 6(1)            |
| F(6)  | 32(1)           | 68(1)           | 22(1)           | -4(1)           | 8(1)            | 15(1)           |
| F(7)  | 40(1)           | 159(3)          | 19(1)           | 3(1)            | 4(1)            | 37(1)           |
| F(8)  | 67(2)           | 173(3)          | 46(1)           | 57(2)           | 29(1)           | 85(2)           |
| F(9)  | 100(2)          | 82(2)           | 82(2)           | 49(1)           | 71(2)           | 65(2)           |
| F(10) | 70(1)           | 44(1)           | 52(1)           | 10(1)           | 42(1)           | 16(1)           |
| N(1)  | 16(1)           | 42(1)           | 13(1)           | -2(1)           | 6(1)            | 1(1)            |
| N(2)  | 20(1)           | 42(1)           | 15(1)           | 1(1)            | 7(1)            | 8(1)            |
| C(1)  | 22(1)           | 37(2)           | 17(1)           | -3(1)           | 9(1)            | -2(1)           |
| C(2)  | 23(1)           | 41(2)           | 20(1)           | 4(1)            | 7(1)            | 2(1)            |
| C(3)  | 32(2)           | 33(2)           | 31(2)           | 1(1)            | 15(1)           | 6(1)            |
| C(4)  | 33(2)           | 34(2)           | 31(2)           | -10(1)          | 13(1)           | -5(1)           |
| C(5)  | 22(1)           | 42(2)           | 20(1)           | -6(1)           | 3(1)            | -2(1)           |
| C(6)  | 21(1)           | 35(2)           | 23(1)           | -4(1)           | 9(1)            | 0(1)            |
| C(7)  | 32(2)           | 50(2)           | 24(1)           | 14(1)           | 16(1)           | 15(1)           |
| C(8)  | 31(2)           | 66(2)           | 20(1)           | 10(1)           | 13(1)           | 21(1)           |
| C(9)  | 40(2)           | 109(3)          | 19(2)           | 18(2)           | 16(1)           | 37(2)           |
| C(10) | 53(2)           | 114(3)          | 34(2)           | 42(2)           | 28(2)           | 54(2)           |
| C(11) | 66(2)           | 73(3)           | 53(2)           | 38(2)           | 46(2)           | 45(2)           |
| C(12) | 50(2)           | 54(2)           | 35(2)           | 18(2)           | 31(2)           | 20(2)           |
| C(13) | 16(1)           | 49(2)           | 13(1)           | -2(1)           | 6(1)            | 2(1)            |
| C(14) | 20(1)           | 44(2)           | 18(1)           | -6(1)           | 8(1)            | 2(1)            |
| C(15) | 21(1)           | 53(2)           | 21(1)           | -15(1)          | 7(1)            | 0(1)            |
| C(16) | 23(1)           | 68(2)           | 16(1)           | -12(1)          | 5(1)            | 2(1)            |

|        |       |       |       |        |       |        |
|--------|-------|-------|-------|--------|-------|--------|
| C(17)  | 20(1) | 66(2) | 15(1) | -7(1)  | 3(1)  | 8(1)   |
| C(18)  | 18(1) | 46(2) | 16(1) | 2(1)   | 7(1)  | 6(1)   |
| C(19)  | 26(1) | 44(2) | 20(1) | -1(1)  | 10(1) | 6(1)   |
| C(20)  | 32(2) | 50(2) | 28(2) | 3(1)   | 12(1) | 15(1)  |
| C(21)  | 26(2) | 59(2) | 31(2) | 5(1)   | 6(1)  | 18(1)  |
| C(22)  | 22(1) | 59(2) | 21(1) | 3(1)   | 4(1)  | 8(1)   |
| O(1A)  | 37(3) | 76(4) | 25(3) | 9(2)   | 7(2)  | 29(3)  |
| C(23A) | 56(4) | 96(5) | 35(4) | 16(4)  | 21(3) | 39(4)  |
| C(24A) | 57(4) | 80(5) | 38(4) | 25(3)  | 22(3) | 29(4)  |
| C(25A) | 68(5) | 98(6) | 36(4) | 12(4)  | 21(4) | 40(5)  |
| C(26A) | 38(4) | 51(4) | 32(4) | -9(3)  | 0(3)  | 16(3)  |
| O(1B)  | 37(3) | 58(3) | 22(2) | 2(2)   | 4(2)  | 8(2)   |
| C(23B) | 43(4) | 66(4) | 40(4) | -10(3) | 17(3) | -12(3) |
| C(24B) | 65(5) | 70(5) | 47(5) | -8(4)  | 31(4) | -3(4)  |
| C(25B) | 80(5) | 72(5) | 39(4) | 17(4)  | 25(4) | 14(5)  |
| C(26B) | 46(4) | 55(4) | 37(3) | 4(3)   | 13(3) | 20(3)  |

---

**Table S27.** Hydrogen coordinates ( $\times 10^4$ ) and isotropic displacement parameters ( $\text{\AA}^2 \times 10^3$ ) for **4**.

|        | x    | y    | z    | U(eq) |
|--------|------|------|------|-------|
| H(14)  | 4848 | -216 | 6135 | 33    |
| H(15)  | 4328 | -950 | 4821 | 38    |
| H(16)  | 3520 | -85  | 3904 | 44    |
| H(17)  | 3255 | 1480 | 4336 | 42    |
| H(19)  | 4331 | 4216 | 7237 | 36    |
| H(20)  | 3533 | 5174 | 6469 | 44    |
| H(21)  | 2851 | 4428 | 5241 | 48    |
| H(22)  | 3017 | 2789 | 4789 | 43    |
| H(23A) | 2150 | 3290 | 3063 | 74    |
| H(23B) | 1767 | 2268 | 2714 | 74    |
| H(24A) | 2211 | 3552 | 1860 | 69    |
| H(24B) | 1691 | 2758 | 1467 | 69    |
| H(25A) | 2244 | 1603 | 1262 | 81    |
| H(25B) | 2771 | 2367 | 1712 | 81    |
| H(26A) | 2420 | 712  | 2437 | 54    |
| H(26B) | 3041 | 1162 | 2720 | 54    |
| H(23C) | 1823 | 1468 | 2485 | 60    |
| H(23D) | 2368 | 794  | 3045 | 60    |
| H(24C) | 2224 | 1306 | 1561 | 70    |
| H(24D) | 2846 | 1361 | 2297 | 70    |
| H(25C) | 2790 | 3074 | 1949 | 76    |
| H(25D) | 2119 | 3061 | 1533 | 76    |
| H(26C) | 2795 | 3632 | 3141 | 56    |
| H(26D) | 2126 | 3660 | 2717 | 56    |

**Table S28.** Torsion angles [°] for **4**.

|                      |           |                         |           |
|----------------------|-----------|-------------------------|-----------|
| C(6)-C(1)-C(2)-F(1)  | -177.8(2) | F(7)-C(9)-C(10)-C(11)   | 178.4(4)  |
| Se(1)-C(1)-C(2)-F(1) | -0.8(4)   | C(8)-C(9)-C(10)-C(11)   | -0.5(6)   |
| C(6)-C(1)-C(2)-C(3)  | 0.9(4)    | F(8)-C(10)-C(11)-F(9)   | -0.8(6)   |
| Se(1)-C(1)-C(2)-C(3) | 177.9(2)  | C(9)-C(10)-C(11)-F(9)   | 180.0(4)  |
| F(1)-C(2)-C(3)-F(2)  | -0.7(4)   | F(8)-C(10)-C(11)-C(12)  | -179.8(4) |
| C(1)-C(2)-C(3)-F(2)  | -179.5(3) | C(9)-C(10)-C(11)-C(12)  | 1.0(6)    |
| F(1)-C(2)-C(3)-C(4)  | 179.0(3)  | F(9)-C(11)-C(12)-F(10)  | -0.4(5)   |
| C(1)-C(2)-C(3)-C(4)  | 0.2(5)    | C(10)-C(11)-C(12)-F(10) | 178.6(3)  |
| F(2)-C(3)-C(4)-F(3)  | 0.1(5)    | F(9)-C(11)-C(12)-C(7)   | 179.3(3)  |
| C(2)-C(3)-C(4)-F(3)  | -179.6(3) | C(10)-C(11)-C(12)-C(7)  | -1.7(6)   |
| F(2)-C(3)-C(4)-C(5)  | 178.9(3)  | C(8)-C(7)-C(12)-F(10)   | -178.4(3) |
| C(2)-C(3)-C(4)-C(5)  | -0.8(5)   | Se(2)-C(7)-C(12)-F(10)  | -1.0(4)   |
| F(3)-C(4)-C(5)-F(4)  | -1.7(4)   | C(8)-C(7)-C(12)-C(11)   | 1.9(5)    |
| C(3)-C(4)-C(5)-F(4)  | 179.5(3)  | Se(2)-C(7)-C(12)-C(11)  | 179.4(3)  |
| F(3)-C(4)-C(5)-C(6)  | 179.0(3)  | C(14)-N(1)-C(13)-C(17)  | 0.0(4)    |
| C(3)-C(4)-C(5)-C(6)  | 0.2(5)    | Th(1)-N(1)-C(13)-C(17)  | -179.9(2) |
| F(4)-C(5)-C(6)-F(5)  | 2.2(4)    | C(14)-N(1)-C(13)-C(18)  | -178.7(2) |
| C(4)-C(5)-C(6)-F(5)  | -178.5(3) | Th(1)-N(1)-C(13)-C(18)  | 1.4(3)    |
| F(4)-C(5)-C(6)-C(1)  | -178.3(3) | C(13)-N(1)-C(14)-C(15)  | 0.8(4)    |
| C(4)-C(5)-C(6)-C(1)  | 1.1(4)    | Th(1)-N(1)-C(14)-C(15)  | -179.3(2) |
| C(2)-C(1)-C(6)-F(5)  | 178.0(2)  | N(1)-C(14)-C(15)-C(16)  | -0.7(5)   |
| Se(1)-C(1)-C(6)-F(5) | 1.0(4)    | C(14)-C(15)-C(16)-C(17) | -0.2(5)   |
| C(2)-C(1)-C(6)-C(5)  | -1.6(4)   | C(15)-C(16)-C(17)-C(13) | 1.0(5)    |
| Se(1)-C(1)-C(6)-C(5) | -178.5(2) | N(1)-C(13)-C(17)-C(16)  | -0.9(5)   |
| C(12)-C(7)-C(8)-F(6) | 179.9(3)  | C(18)-C(13)-C(17)-C(16) | 177.8(3)  |
| Se(2)-C(7)-C(8)-F(6) | 2.5(4)    | C(19)-N(2)-C(18)-C(22)  | -3.2(4)   |
| C(12)-C(7)-C(8)-C(9) | -1.4(5)   | Th(1)-N(2)-C(18)-C(22)  | 170.8(2)  |
| Se(2)-C(7)-C(8)-C(9) | -178.9(3) | C(19)-N(2)-C(18)-C(13)  | 174.6(3)  |
| F(6)-C(8)-C(9)-F(7)  | 0.5(5)    | Th(1)-N(2)-C(18)-C(13)  | -11.3(3)  |
| C(7)-C(8)-C(9)-F(7)  | -178.2(3) | N(1)-C(13)-C(18)-N(2)   | 6.5(4)    |
| F(6)-C(8)-C(9)-C(10) | 179.4(3)  | C(17)-C(13)-C(18)-N(2)  | -172.3(3) |
| C(7)-C(8)-C(9)-C(10) | 0.8(6)    | N(1)-C(13)-C(18)-C(22)  | -175.7(3) |
| F(7)-C(9)-C(10)-F(8) | -0.8(6)   | C(17)-C(13)-C(18)-C(22) | 5.6(4)    |
| C(8)-C(9)-C(10)-F(8) | -179.8(4) | C(18)-N(2)-C(19)-C(20)  | 2.2(4)    |



|                            |           |                             |           |
|----------------------------|-----------|-----------------------------|-----------|
| Th(1)-N(2)-C(19)-C(20)     | -171.9(2) | C(23A)-C(24A)-C(25A)-C(26A) | 3.6(12)   |
| N(2)-C(19)-C(20)-C(21)     | 0.4(5)    | C(23A)-O(1A)-C(26A)-C(25A)  | 32.1(10)  |
| C(19)-C(20)-C(21)-C(22)    | -2.0(5)   | C(24A)-C(25A)-C(26A)-O(1A)  | -21.7(11) |
| C(20)-C(21)-C(22)-C(18)    | 0.9(5)    | C(26B)-O(1B)-C(23B)-C(24B)  | 35.2(9)   |
| N(2)-C(18)-C(22)-C(21)     | 1.7(5)    | O(1B)-C(23B)-C(24B)-C(25B)  | -35.2(10) |
| C(13)-C(18)-C(22)-C(21)    | -176.0(3) | C(23B)-C(24B)-C(25B)-C(26B) | 22.3(10)  |
| C(26A)-O(1A)-C(23A)-C(24A) | -30.2(11) | C(23B)-O(1B)-C(26B)-C(25B)  | -20.6(9)  |
| O(1A)-C(23A)-C(24A)-C(25A) | 15.8(12)  | C(24B)-C(25B)-C(26B)-O(1B)  | -2.0(10)  |

---

Symmetry transformations used to generate equivalent atoms: #1 -x+1,y,-z+3/2

**Table S29.** Hydrogen bonds [ $\text{\AA}$  and  $^\circ$ ] for **4**.

| D-H...A                 | d(D-H) | d(H...A) | d(D...A) | $\angle(\text{DHA})$ |
|-------------------------|--------|----------|----------|----------------------|
| C(14)-H(14)...Se(1)#1   | 0.95   | 2.87     | 3.544(3) | 129.3                |
| C(14)-H(14)...F(1)#1    | 0.95   | 2.51     | 3.402(3) | 156.1                |
| C(15)-H(15)...F(6)#2    | 0.95   | 2.60     | 3.297(3) | 130.8                |
| C(19)-H(19)...Se(2)#1   | 0.95   | 2.92     | 3.383(3) | 111.1                |
| C(23A)-H(23A)...F(5)#3  | 0.99   | 2.51     | 3.425(8) | 154.3                |
| C(25A)-H(25A)...F(3)#4  | 0.99   | 2.49     | 3.260(9) | 134.0                |
| C(26A)-H(26A)...F(8)#5  | 0.99   | 2.58     | 3.463(8) | 147.8                |
| C(26B)-H(26C)...F(8)    | 0.99   | 2.32     | 3.273(9) | 160.1                |
| C(26B)-H(26D)...Se(1)#3 | 0.99   | 3.14     | 4.091(8) | 161.3                |

Symmetry transformations used to generate equivalent atoms:

#1  $-x+1, y, -z+3/2$  #2  $-x+1, -y, -z+1$  #3  $-x+1/2, -y+1/2, -z+1$

#4  $-x+1/2, y+1/2, -z+1/2$  #5  $-x+1/2, y-1/2, -z+1/2$

**Table S30.** Crystal data and structure refinement for **5**.

|                                   |                                                                  |                    |
|-----------------------------------|------------------------------------------------------------------|--------------------|
| Identification code               | ter py_P21n                                                      |                    |
| Empirical formula                 | C <sub>54</sub> H <sub>46</sub> N <sub>6</sub> S <sub>4</sub> Th |                    |
| Formula weight                    | 1139.25                                                          |                    |
| Temperature                       | 100(2) K                                                         |                    |
| Wavelength                        | 0.71073 Å                                                        |                    |
| Crystal system                    | Monoclinic                                                       |                    |
| Space group                       | P2 <sub>1</sub> /n                                               |                    |
| Unit cell dimensions              | a = 15.1881(10) Å                                                | α = 90°.           |
|                                   | b = 21.6317(14) Å                                                | β = 111.1460(10)°. |
|                                   | c = 15.6510(10) Å                                                | γ = 90°.           |
| Volume                            | 4795.8(5) Å <sup>3</sup>                                         |                    |
| Z                                 | 4                                                                |                    |
| Density (calculated)              | 1.578 Mg/m <sup>3</sup>                                          |                    |
| Absorption coefficient            | 3.328 mm <sup>-1</sup>                                           |                    |
| F(000)                            | 2264                                                             |                    |
| Crystal size                      | .55 x .14 x .12 mm <sup>3</sup>                                  |                    |
| Theta range for data collection   | 1.683 to 29.574°.                                                |                    |
| Index ranges                      | -21 ≤ h ≤ 15, -29 ≤ k ≤ 25, -11 ≤ l ≤ 21                         |                    |
| Reflections collected             | 27936                                                            |                    |
| Independent reflections           | 13310 [R(int) = 0.0398]                                          |                    |
| Completeness to theta = 25.242°   | 99.9 %                                                           |                    |
| Absorption correction             | Semi-empirical from equivalents                                  |                    |
| Max. and min. transmission        | 0.7464 and 0.4586                                                |                    |
| Refinement method                 | Full-matrix least-squares on F <sup>2</sup>                      |                    |
| Data / restraints / parameters    | 13310 / 0 / 586                                                  |                    |
| Goodness-of-fit on F <sup>2</sup> | 0.987                                                            |                    |
| Final R indices [I > 2σ(I)]       | R1 = 0.0371, wR2 = 0.0733                                        |                    |
| R indices (all data)              | R1 = 0.0541, wR2 = 0.0786                                        |                    |
| Extinction coefficient            | n/a                                                              |                    |
| Largest diff. peak and hole       | 2.018 and -2.023 e.Å <sup>-3</sup>                               |                    |

**Table S31.** Atomic coordinates ( $\times 10^4$ ) and equivalent isotropic displacement parameters ( $\text{\AA}^2 \times 10^3$ ) for **5**. U(eq) is defined as one third of the trace of the orthogonalized  $U^{ij}$  tensor.

|       | x       | y       | z       | U(eq) |
|-------|---------|---------|---------|-------|
| Th(1) | 6743(1) | 4351(1) | 2347(1) | 11(1) |
| S(1)  | 8723(1) | 4435(1) | 2809(1) | 18(1) |
| S(2)  | 6510(1) | 5614(1) | 1847(1) | 16(1) |
| S(3)  | 5238(1) | 4703(1) | 2924(1) | 19(1) |
| S(4)  | 5015(1) | 3771(1) | 1292(1) | 17(1) |
| N(1)  | 6910(2) | 3448(1) | 3500(2) | 18(1) |
| N(2)  | 7333(2) | 3287(1) | 1967(2) | 14(1) |
| N(3)  | 6780(2) | 4204(1) | 713(2)  | 14(1) |
| N(4)  | 7739(2) | 4790(2) | 4063(2) | 17(1) |
| C(1)  | 9107(3) | 4218(2) | 1908(2) | 18(1) |
| C(2)  | 9542(3) | 3650(2) | 1922(3) | 23(1) |
| C(3)  | 9854(3) | 3492(2) | 1217(3) | 32(1) |
| C(4)  | 9747(3) | 3895(2) | 505(3)  | 35(1) |
| C(5)  | 9319(3) | 4461(2) | 488(3)  | 29(1) |
| C(6)  | 9006(3) | 4628(2) | 1187(2) | 21(1) |
| C(7)  | 7487(3) | 5902(2) | 1602(2) | 17(1) |
| C(8)  | 7404(3) | 6038(2) | 694(2)  | 21(1) |
| C(9)  | 8165(3) | 6289(2) | 520(3)  | 25(1) |
| C(10) | 8997(3) | 6423(2) | 1228(3) | 26(1) |
| C(11) | 9081(3) | 6299(2) | 2127(3) | 24(1) |
| C(12) | 8338(3) | 6038(2) | 2308(2) | 20(1) |
| C(13) | 5288(3) | 5429(2) | 3477(2) | 20(1) |
| C(14) | 4992(3) | 5968(2) | 2973(2) | 21(1) |
| C(15) | 4919(3) | 6515(2) | 3391(3) | 28(1) |
| C(16) | 5163(3) | 6543(2) | 4338(3) | 32(1) |
| C(17) | 5486(3) | 6013(2) | 4845(3) | 33(1) |
| C(18) | 5549(3) | 5461(2) | 4426(2) | 24(1) |
| C(19) | 5150(3) | 3137(2) | 636(2)  | 17(1) |
| C(20) | 5300(3) | 2539(2) | 999(2)  | 20(1) |
| C(21) | 5369(3) | 2035(2) | 476(2)  | 24(1) |
| C(22) | 5303(3) | 2121(2) | -426(2) | 23(1) |

|       |         |         |         |       |
|-------|---------|---------|---------|-------|
| C(23) | 5163(3) | 2711(2) | -794(2) | 21(1) |
| C(24) | 5088(2) | 3217(2) | -274(2) | 17(1) |
| C(25) | 6697(3) | 3529(2) | 4256(2) | 23(1) |
| C(26) | 7059(3) | 3164(2) | 5029(2) | 27(1) |
| C(27) | 7696(3) | 2709(2) | 5039(2) | 25(1) |
| C(28) | 7900(3) | 2600(2) | 4259(2) | 23(1) |
| C(29) | 7481(3) | 2967(2) | 3492(2) | 16(1) |
| C(30) | 7604(2) | 2839(2) | 2606(2) | 15(1) |
| C(31) | 7950(3) | 2271(2) | 2448(2) | 21(1) |
| C(32) | 8010(3) | 2159(2) | 1605(2) | 20(1) |
| C(33) | 7743(3) | 2617(2) | 946(2)  | 21(1) |
| C(34) | 7427(2) | 3184(2) | 1153(2) | 16(1) |
| C(35) | 7155(2) | 3694(2) | 476(2)  | 14(1) |
| C(36) | 7270(3) | 3651(2) | -363(2) | 18(1) |
| C(37) | 6969(3) | 4134(2) | -984(2) | 23(1) |
| C(38) | 6539(3) | 4637(2) | -764(2) | 22(1) |
| C(39) | 6453(3) | 4654(2) | 82(2)   | 18(1) |
| C(40) | 7606(3) | 5380(2) | 4241(2) | 17(1) |
| C(41) | 8146(3) | 5677(2) | 5047(2) | 26(1) |
| C(42) | 8856(3) | 5350(2) | 5700(2) | 30(1) |
| C(43) | 9001(3) | 4744(2) | 5519(2) | 29(1) |
| C(44) | 8429(3) | 4479(2) | 4706(2) | 24(1) |
| N(5)  | 7566(3) | 3931(2) | 6930(3) | 45(1) |
| C(45) | 7095(3) | 4447(2) | 6714(3) | 36(1) |
| C(46) | 7442(4) | 5012(3) | 7081(3) | 44(1) |
| C(47) | 8350(3) | 5039(2) | 7710(3) | 39(1) |
| C(48) | 8869(3) | 4502(2) | 7941(3) | 32(1) |
| C(49) | 8454(3) | 3955(2) | 7541(3) | 38(1) |
| N(6)  | 7944(4) | 2408(2) | 8690(3) | 48(1) |
| C(50) | 8797(4) | 2403(2) | 8629(3) | 49(2) |
| C(51) | 9025(4) | 2064(3) | 7995(3) | 47(1) |
| C(52) | 8328(4) | 1718(2) | 7380(3) | 44(1) |
| C(53) | 7454(4) | 1721(3) | 7422(3) | 48(1) |
| C(54) | 7296(4) | 2066(3) | 8085(3) | 50(1) |

**Table S32.** Bond lengths [Å] and angles [°] for **5**.

|            |            |             |          |
|------------|------------|-------------|----------|
| Th(1)-N(3) | 2.598(3)   | C(8)-H(8)   | 0.9500   |
| Th(1)-N(1) | 2.609(3)   | C(9)-C(10)  | 1.378(6) |
| Th(1)-N(2) | 2.614(3)   | C(9)-H(9)   | 0.9500   |
| Th(1)-N(4) | 2.734(3)   | C(10)-C(11) | 1.392(5) |
| Th(1)-S(2) | 2.8282(9)  | C(10)-H(10) | 0.9500   |
| Th(1)-S(1) | 2.8348(10) | C(11)-C(12) | 1.379(5) |
| Th(1)-S(4) | 2.8384(9)  | C(11)-H(11) | 0.9500   |
| Th(1)-S(3) | 2.8479(9)  | C(12)-H(12) | 0.9500   |
| S(1)-C(1)  | 1.772(4)   | C(13)-C(14) | 1.388(5) |
| S(2)-C(7)  | 1.775(4)   | C(13)-C(18) | 1.394(5) |
| S(3)-C(13) | 1.780(4)   | C(14)-C(15) | 1.376(5) |
| S(4)-C(19) | 1.770(4)   | C(14)-H(14) | 0.9500   |
| N(1)-C(25) | 1.346(4)   | C(15)-C(16) | 1.393(5) |
| N(1)-C(29) | 1.357(5)   | C(15)-H(15) | 0.9500   |
| N(2)-C(30) | 1.346(4)   | C(16)-C(17) | 1.378(6) |
| N(2)-C(34) | 1.350(4)   | C(16)-H(16) | 0.9500   |
| N(3)-C(39) | 1.347(4)   | C(17)-C(18) | 1.383(6) |
| N(3)-C(35) | 1.353(4)   | C(17)-H(17) | 0.9500   |
| N(4)-C(40) | 1.336(5)   | C(18)-H(18) | 0.9500   |
| N(4)-C(44) | 1.344(5)   | C(19)-C(20) | 1.399(5) |
| C(1)-C(2)  | 1.391(5)   | C(19)-C(24) | 1.403(4) |
| C(1)-C(6)  | 1.399(5)   | C(20)-C(21) | 1.388(5) |
| C(2)-C(3)  | 1.392(5)   | C(20)-H(20) | 0.9500   |
| C(2)-H(2)  | 0.9500     | C(21)-C(22) | 1.391(5) |
| C(3)-C(4)  | 1.378(6)   | C(21)-H(21) | 0.9500   |
| C(3)-H(3)  | 0.9500     | C(22)-C(23) | 1.385(5) |
| C(4)-C(5)  | 1.382(6)   | C(22)-H(22) | 0.9500   |
| C(4)-H(4)  | 0.9500     | C(23)-C(24) | 1.393(5) |
| C(5)-C(6)  | 1.387(5)   | C(23)-H(23) | 0.9500   |
| C(5)-H(5)  | 0.9500     | C(24)-H(24) | 0.9500   |
| C(6)-H(6)  | 0.9500     | C(25)-C(26) | 1.381(5) |
| C(7)-C(12) | 1.396(5)   | C(25)-H(25) | 0.9500   |
| C(7)-C(8)  | 1.411(5)   | C(26)-C(27) | 1.378(6) |
| C(8)-C(9)  | 1.390(5)   | C(26)-H(26) | 0.9500   |

|                 |           |                 |          |
|-----------------|-----------|-----------------|----------|
| C(27)-C(28)     | 1.383(5)  | C(42)-H(42)     | 0.9500   |
| C(27)-H(27)     | 0.9500    | C(43)-C(44)     | 1.380(5) |
| C(28)-C(29)     | 1.388(5)  | C(43)-H(43)     | 0.9500   |
| C(28)-H(28)     | 0.9500    | C(44)-H(44)     | 0.9500   |
| C(29)-C(30)     | 1.490(4)  | N(5)-C(45)      | 1.303(6) |
| C(30)-C(31)     | 1.393(5)  | N(5)-C(49)      | 1.344(6) |
| C(31)-C(32)     | 1.377(5)  | C(45)-C(46)     | 1.370(7) |
| C(31)-H(31)     | 0.9500    | C(45)-H(45)     | 0.9500   |
| C(32)-C(33)     | 1.381(5)  | C(46)-C(47)     | 1.377(6) |
| C(32)-H(32)     | 0.9500    | C(46)-H(46)     | 0.9500   |
| C(33)-C(34)     | 1.398(5)  | C(47)-C(48)     | 1.377(6) |
| C(33)-H(33)     | 0.9500    | C(47)-H(47)     | 0.9500   |
| C(34)-C(35)     | 1.482(5)  | C(48)-C(49)     | 1.379(6) |
| C(35)-C(36)     | 1.389(4)  | C(48)-H(48)     | 0.9500   |
| C(36)-C(37)     | 1.387(5)  | C(49)-H(49)     | 0.9500   |
| C(36)-H(36)     | 0.9500    | N(6)-C(54)      | 1.319(7) |
| C(37)-C(38)     | 1.376(5)  | N(6)-C(50)      | 1.332(7) |
| C(37)-H(37)     | 0.9500    | C(50)-C(51)     | 1.377(7) |
| C(38)-C(39)     | 1.377(5)  | C(50)-H(50)     | 0.9500   |
| C(38)-H(38)     | 0.9500    | C(51)-C(52)     | 1.368(7) |
| C(39)-H(39)     | 0.9500    | C(51)-H(51)     | 0.9500   |
| C(40)-C(41)     | 1.389(5)  | C(52)-C(53)     | 1.352(7) |
| C(40)-H(40)     | 0.9500    | C(52)-H(52)     | 0.9500   |
| C(41)-C(42)     | 1.384(6)  | C(53)-C(54)     | 1.367(7) |
| C(41)-H(41)     | 0.9500    | C(53)-H(53)     | 0.9500   |
| C(42)-C(43)     | 1.375(6)  | C(54)-H(54)     | 0.9500   |
|                 |           |                 |          |
| N(3)-Th(1)-N(1) | 123.94(9) | N(4)-Th(1)-S(2) | 84.59(7) |
| N(3)-Th(1)-N(2) | 62.45(9)  | N(3)-Th(1)-S(1) | 81.99(7) |
| N(1)-Th(1)-N(2) | 62.79(9)  | N(1)-Th(1)-S(1) | 92.40(7) |
| N(3)-Th(1)-N(4) | 143.97(9) | N(2)-Th(1)-S(1) | 72.23(7) |
| N(1)-Th(1)-N(4) | 72.51(9)  | N(4)-Th(1)-S(1) | 64.35(7) |
| N(2)-Th(1)-N(4) | 114.58(9) | S(2)-Th(1)-S(1) | 91.38(3) |
| N(3)-Th(1)-S(2) | 83.70(6)  | N(3)-Th(1)-S(4) | 73.59(7) |
| N(1)-Th(1)-S(2) | 152.36(6) | N(1)-Th(1)-S(4) | 84.88(7) |
| N(2)-Th(1)-S(2) | 143.68(6) | N(2)-Th(1)-S(4) | 78.46(6) |

|                  |            |                   |          |
|------------------|------------|-------------------|----------|
| N(4)-Th(1)-S(4)  | 142.45(6)  | C(3)-C(4)-H(4)    | 120.2    |
| S(2)-Th(1)-S(4)  | 105.57(3)  | C(5)-C(4)-H(4)    | 120.2    |
| S(1)-Th(1)-S(4)  | 148.19(3)  | C(4)-C(5)-C(6)    | 120.5(4) |
| N(3)-Th(1)-S(3)  | 130.54(7)  | C(4)-C(5)-H(5)    | 119.8    |
| N(1)-Th(1)-S(3)  | 82.53(7)   | C(6)-C(5)-H(5)    | 119.8    |
| N(2)-Th(1)-S(3)  | 133.46(7)  | C(5)-C(6)-C(1)    | 120.2(4) |
| N(4)-Th(1)-S(3)  | 79.54(7)   | C(5)-C(6)-H(6)    | 119.9    |
| S(2)-Th(1)-S(3)  | 78.17(3)   | C(1)-C(6)-H(6)    | 119.9    |
| S(1)-Th(1)-S(3)  | 143.27(3)  | C(12)-C(7)-C(8)   | 118.4(3) |
| S(4)-Th(1)-S(3)  | 67.87(3)   | C(12)-C(7)-S(2)   | 120.7(3) |
| C(1)-S(1)-Th(1)  | 113.77(12) | C(8)-C(7)-S(2)    | 120.8(3) |
| C(7)-S(2)-Th(1)  | 111.59(12) | C(9)-C(8)-C(7)    | 120.0(3) |
| C(13)-S(3)-Th(1) | 119.40(13) | C(9)-C(8)-H(8)    | 120.0    |
| C(19)-S(4)-Th(1) | 113.80(12) | C(7)-C(8)-H(8)    | 120.0    |
| C(25)-N(1)-C(29) | 117.7(3)   | C(10)-C(9)-C(8)   | 120.7(3) |
| C(25)-N(1)-Th(1) | 121.1(2)   | C(10)-C(9)-H(9)   | 119.6    |
| C(29)-N(1)-Th(1) | 118.0(2)   | C(8)-C(9)-H(9)    | 119.6    |
| C(30)-N(2)-C(34) | 118.3(3)   | C(9)-C(10)-C(11)  | 119.7(4) |
| C(30)-N(2)-Th(1) | 120.2(2)   | C(9)-C(10)-H(10)  | 120.1    |
| C(34)-N(2)-Th(1) | 121.4(2)   | C(11)-C(10)-H(10) | 120.1    |
| C(39)-N(3)-C(35) | 117.9(3)   | C(12)-C(11)-C(10) | 120.2(4) |
| C(39)-N(3)-Th(1) | 120.0(2)   | C(12)-C(11)-H(11) | 119.9    |
| C(35)-N(3)-Th(1) | 122.0(2)   | C(10)-C(11)-H(11) | 119.9    |
| C(40)-N(4)-C(44) | 117.3(3)   | C(11)-C(12)-C(7)  | 121.1(3) |
| C(40)-N(4)-Th(1) | 117.7(2)   | C(11)-C(12)-H(12) | 119.5    |
| C(44)-N(4)-Th(1) | 124.5(2)   | C(7)-C(12)-H(12)  | 119.5    |
| C(2)-C(1)-C(6)   | 119.0(3)   | C(14)-C(13)-C(18) | 118.2(4) |
| C(2)-C(1)-S(1)   | 120.8(3)   | C(14)-C(13)-S(3)  | 121.1(3) |
| C(6)-C(1)-S(1)   | 120.2(3)   | C(18)-C(13)-S(3)  | 120.5(3) |
| C(1)-C(2)-C(3)   | 120.0(4)   | C(15)-C(14)-C(13) | 121.2(3) |
| C(1)-C(2)-H(2)   | 120.0      | C(15)-C(14)-H(14) | 119.4    |
| C(3)-C(2)-H(2)   | 120.0      | C(13)-C(14)-H(14) | 119.4    |
| C(4)-C(3)-C(2)   | 120.7(4)   | C(14)-C(15)-C(16) | 120.5(4) |
| C(4)-C(3)-H(3)   | 119.7      | C(14)-C(15)-H(15) | 119.8    |
| C(2)-C(3)-H(3)   | 119.7      | C(16)-C(15)-H(15) | 119.8    |
| C(3)-C(4)-C(5)   | 119.6(4)   | C(17)-C(16)-C(15) | 118.7(4) |



|                   |          |                   |          |
|-------------------|----------|-------------------|----------|
| C(17)-C(16)-H(16) | 120.7    | C(27)-C(28)-H(28) | 120.4    |
| C(15)-C(16)-H(16) | 120.7    | C(29)-C(28)-H(28) | 120.4    |
| C(16)-C(17)-C(18) | 121.0(4) | N(1)-C(29)-C(28)  | 121.7(3) |
| C(16)-C(17)-H(17) | 119.5    | N(1)-C(29)-C(30)  | 116.5(3) |
| C(18)-C(17)-H(17) | 119.5    | C(28)-C(29)-C(30) | 121.8(3) |
| C(17)-C(18)-C(13) | 120.5(4) | N(2)-C(30)-C(31)  | 122.5(3) |
| C(17)-C(18)-H(18) | 119.8    | N(2)-C(30)-C(29)  | 116.8(3) |
| C(13)-C(18)-H(18) | 119.8    | C(31)-C(30)-C(29) | 120.7(3) |
| C(20)-C(19)-C(24) | 117.8(3) | C(32)-C(31)-C(30) | 119.1(3) |
| C(20)-C(19)-S(4)  | 121.2(3) | C(32)-C(31)-H(31) | 120.5    |
| C(24)-C(19)-S(4)  | 121.0(3) | C(30)-C(31)-H(31) | 120.5    |
| C(21)-C(20)-C(19) | 121.5(3) | C(31)-C(32)-C(33) | 119.0(3) |
| C(21)-C(20)-H(20) | 119.2    | C(31)-C(32)-H(32) | 120.5    |
| C(19)-C(20)-H(20) | 119.2    | C(33)-C(32)-H(32) | 120.5    |
| C(20)-C(21)-C(22) | 120.0(3) | C(32)-C(33)-C(34) | 119.3(3) |
| C(20)-C(21)-H(21) | 120.0    | C(32)-C(33)-H(33) | 120.3    |
| C(22)-C(21)-H(21) | 120.0    | C(34)-C(33)-H(33) | 120.3    |
| C(23)-C(22)-C(21) | 119.3(3) | N(2)-C(34)-C(33)  | 121.7(3) |
| C(23)-C(22)-H(22) | 120.4    | N(2)-C(34)-C(35)  | 117.0(3) |
| C(21)-C(22)-H(22) | 120.4    | C(33)-C(34)-C(35) | 121.2(3) |
| C(22)-C(23)-C(24) | 120.9(3) | N(3)-C(35)-C(36)  | 121.6(3) |
| C(22)-C(23)-H(23) | 119.6    | N(3)-C(35)-C(34)  | 116.6(3) |
| C(24)-C(23)-H(23) | 119.6    | C(36)-C(35)-C(34) | 121.9(3) |
| C(23)-C(24)-C(19) | 120.5(3) | C(37)-C(36)-C(35) | 119.3(3) |
| C(23)-C(24)-H(24) | 119.8    | C(37)-C(36)-H(36) | 120.4    |
| C(19)-C(24)-H(24) | 119.8    | C(35)-C(36)-H(36) | 120.4    |
| N(1)-C(25)-C(26)  | 123.4(4) | C(38)-C(37)-C(36) | 119.1(3) |
| N(1)-C(25)-H(25)  | 118.3    | C(38)-C(37)-H(37) | 120.5    |
| C(26)-C(25)-H(25) | 118.3    | C(36)-C(37)-H(37) | 120.5    |
| C(27)-C(26)-C(25) | 118.3(4) | C(37)-C(38)-C(39) | 118.7(3) |
| C(27)-C(26)-H(26) | 120.9    | C(37)-C(38)-H(38) | 120.6    |
| C(25)-C(26)-H(26) | 120.9    | C(39)-C(38)-H(38) | 120.6    |
| C(26)-C(27)-C(28) | 119.5(3) | N(3)-C(39)-C(38)  | 123.2(3) |
| C(26)-C(27)-H(27) | 120.3    | N(3)-C(39)-H(39)  | 118.4    |
| C(28)-C(27)-H(27) | 120.3    | C(38)-C(39)-H(39) | 118.4    |
| C(27)-C(28)-C(29) | 119.2(4) | N(4)-C(40)-C(41)  | 123.2(4) |

|                   |          |                   |          |
|-------------------|----------|-------------------|----------|
| N(4)-C(40)-H(40)  | 118.4    | C(46)-C(47)-H(47) | 120.6    |
| C(41)-C(40)-H(40) | 118.4    | C(47)-C(48)-C(49) | 118.7(4) |
| C(42)-C(41)-C(40) | 118.8(4) | C(47)-C(48)-H(48) | 120.7    |
| C(42)-C(41)-H(41) | 120.6    | C(49)-C(48)-H(48) | 120.7    |
| C(40)-C(41)-H(41) | 120.6    | N(5)-C(49)-C(48)  | 122.2(5) |
| C(43)-C(42)-C(41) | 118.4(4) | N(5)-C(49)-H(49)  | 118.9    |
| C(43)-C(42)-H(42) | 120.8    | C(48)-C(49)-H(49) | 118.9    |
| C(41)-C(42)-H(42) | 120.8    | C(54)-N(6)-C(50)  | 115.9(4) |
| C(42)-C(43)-C(44) | 119.5(4) | N(6)-C(50)-C(51)  | 124.0(5) |
| C(42)-C(43)-H(43) | 120.2    | N(6)-C(50)-H(50)  | 118.0    |
| C(44)-C(43)-H(43) | 120.2    | C(51)-C(50)-H(50) | 118.0    |
| N(4)-C(44)-C(43)  | 122.9(4) | C(52)-C(51)-C(50) | 117.8(5) |
| N(4)-C(44)-H(44)  | 118.6    | C(52)-C(51)-H(51) | 121.1    |
| C(43)-C(44)-H(44) | 118.6    | C(50)-C(51)-H(51) | 121.1    |
| C(45)-N(5)-C(49)  | 117.9(4) | C(53)-C(52)-C(51) | 119.2(4) |
| N(5)-C(45)-C(46)  | 124.2(5) | C(53)-C(52)-H(52) | 120.4    |
| N(5)-C(45)-H(45)  | 117.9    | C(51)-C(52)-H(52) | 120.4    |
| C(46)-C(45)-H(45) | 117.9    | C(52)-C(53)-C(54) | 118.9(5) |
| C(45)-C(46)-C(47) | 118.2(5) | C(52)-C(53)-H(53) | 120.5    |
| C(45)-C(46)-H(46) | 120.9    | C(54)-C(53)-H(53) | 120.5    |
| C(47)-C(46)-H(46) | 120.9    | N(6)-C(54)-C(53)  | 124.1(5) |
| C(48)-C(47)-C(46) | 118.9(5) | N(6)-C(54)-H(54)  | 117.9    |
| C(48)-C(47)-H(47) | 120.6    | C(53)-C(54)-H(54) | 117.9    |

---

**Table S33.** Anisotropic displacement parameters ( $\text{\AA}^2 \times 10^3$ ) for **5**.The anisotropic displacement factor exponent takes the form:  $-2\pi^2 [ h^2 a^{*2}U^{11} + \dots + 2 h k a^* b^* U^{12} ]$ 

|       | U <sup>11</sup> | U <sup>22</sup> | U <sup>33</sup> | U <sup>23</sup> | U <sup>13</sup> | U <sup>12</sup> |
|-------|-----------------|-----------------|-----------------|-----------------|-----------------|-----------------|
| Th(1) | 12(1)           | 11(1)           | 10(1)           | 0(1)            | 2(1)            | 1(1)            |
| S(1)  | 14(1)           | 21(1)           | 17(1)           | -2(1)           | 4(1)            | 0(1)            |
| S(2)  | 17(1)           | 14(1)           | 18(1)           | 2(1)            | 6(1)            | 2(1)            |
| S(3)  | 19(1)           | 20(1)           | 19(1)           | -1(1)           | 8(1)            | 1(1)            |
| S(4)  | 15(1)           | 18(1)           | 17(1)           | -3(1)           | 4(1)            | -2(1)           |
| N(1)  | 24(2)           | 13(2)           | 15(1)           | 2(1)            | 6(1)            | -1(1)           |
| N(2)  | 12(2)           | 14(2)           | 15(1)           | -1(1)           | 3(1)            | -1(1)           |
| N(3)  | 14(2)           | 14(2)           | 12(1)           | 0(1)            | 2(1)            | -1(1)           |
| N(4)  | 17(2)           | 23(2)           | 12(1)           | -1(1)           | 4(1)            | -3(1)           |
| C(1)  | 10(2)           | 21(2)           | 18(2)           | -3(1)           | 1(1)            | -3(1)           |
| C(2)  | 18(2)           | 21(2)           | 29(2)           | -4(2)           | 7(2)            | 2(2)            |
| C(3)  | 20(2)           | 31(2)           | 45(2)           | -13(2)          | 13(2)           | -1(2)           |
| C(4)  | 28(2)           | 51(3)           | 33(2)           | -16(2)          | 19(2)           | -7(2)           |
| C(5)  | 22(2)           | 41(3)           | 24(2)           | -2(2)           | 7(2)            | -14(2)          |
| C(6)  | 15(2)           | 23(2)           | 24(2)           | -1(2)           | 4(1)            | -3(2)           |
| C(7)  | 20(2)           | 11(2)           | 22(2)           | 2(1)            | 10(1)           | 6(2)            |
| C(8)  | 23(2)           | 19(2)           | 21(2)           | 2(1)            | 7(2)            | 2(2)            |
| C(9)  | 28(2)           | 24(2)           | 26(2)           | 7(2)            | 14(2)           | 2(2)            |
| C(10) | 25(2)           | 20(2)           | 41(2)           | 2(2)            | 22(2)           | 0(2)            |
| C(11) | 17(2)           | 27(2)           | 30(2)           | -9(2)           | 9(2)            | -3(2)           |
| C(12) | 20(2)           | 19(2)           | 21(2)           | -3(1)           | 7(2)            | 1(2)            |
| C(13) | 17(2)           | 25(2)           | 20(2)           | -5(1)           | 11(1)           | -3(2)           |
| C(14) | 20(2)           | 20(2)           | 24(2)           | -4(2)           | 11(2)           | -3(2)           |
| C(15) | 30(2)           | 24(2)           | 34(2)           | -2(2)           | 15(2)           | -5(2)           |
| C(16) | 30(3)           | 35(3)           | 36(2)           | -15(2)          | 17(2)           | -3(2)           |
| C(17) | 31(3)           | 45(3)           | 23(2)           | -10(2)          | 10(2)           | 0(2)            |
| C(18) | 24(2)           | 33(2)           | 15(2)           | -1(2)           | 7(2)            | -2(2)           |
| C(19) | 13(2)           | 18(2)           | 17(2)           | 0(1)            | 1(1)            | -1(2)           |
| C(20) | 17(2)           | 21(2)           | 18(2)           | 2(1)            | 1(1)            | -2(2)           |
| C(21) | 24(2)           | 15(2)           | 27(2)           | 3(2)            | 2(2)            | 0(2)            |
| C(22) | 22(2)           | 21(2)           | 23(2)           | -9(2)           | 3(2)            | -1(2)           |

|       |       |       |       |        |       |        |
|-------|-------|-------|-------|--------|-------|--------|
| C(23) | 18(2) | 26(2) | 16(2) | -1(1)  | 4(1)  | 0(2)   |
| C(24) | 16(2) | 16(2) | 16(2) | 2(1)   | 4(1)  | 0(2)   |
| C(25) | 32(2) | 22(2) | 17(2) | 3(1)   | 11(2) | 3(2)   |
| C(26) | 40(3) | 24(2) | 19(2) | 5(2)   | 13(2) | -2(2)  |
| C(27) | 27(2) | 27(2) | 18(2) | 8(2)   | 5(2)  | 2(2)   |
| C(28) | 23(2) | 22(2) | 21(2) | 9(2)   | 6(2)  | 6(2)   |
| C(29) | 16(2) | 12(2) | 19(2) | 2(1)   | 5(1)  | -1(1)  |
| C(30) | 12(2) | 16(2) | 16(1) | 3(1)   | 4(1)  | -2(1)  |
| C(31) | 14(2) | 16(2) | 28(2) | 1(2)   | 4(1)  | -4(2)  |
| C(32) | 20(2) | 8(2)  | 29(2) | -3(1)  | 7(2)  | 1(1)   |
| C(33) | 21(2) | 19(2) | 23(2) | -6(1)  | 7(2)  | -2(2)  |
| C(34) | 13(2) | 18(2) | 17(2) | -2(1)  | 5(1)  | 0(2)   |
| C(35) | 7(2)  | 19(2) | 15(1) | -3(1)  | 2(1)  | -4(1)  |
| C(36) | 16(2) | 22(2) | 16(2) | -3(1)  | 5(1)  | -5(2)  |
| C(37) | 25(2) | 32(2) | 11(2) | 2(1)   | 7(1)  | -3(2)  |
| C(38) | 22(2) | 25(2) | 17(2) | 3(1)   | 6(1)  | 0(2)   |
| C(39) | 18(2) | 17(2) | 16(2) | 2(1)   | 3(1)  | 2(2)   |
| C(40) | 15(2) | 18(2) | 18(2) | -2(1)  | 5(1)  | -2(2)  |
| C(41) | 25(2) | 27(2) | 25(2) | -8(2)  | 6(2)  | -5(2)  |
| C(42) | 21(2) | 43(3) | 19(2) | -9(2)  | 0(2)  | -3(2)  |
| C(43) | 20(2) | 42(3) | 18(2) | 0(2)   | -1(2) | 3(2)   |
| C(44) | 28(2) | 26(2) | 17(2) | 1(1)   | 6(2)  | 3(2)   |
| N(5)  | 42(3) | 61(3) | 41(2) | -19(2) | 26(2) | -14(2) |
| C(45) | 23(2) | 67(4) | 19(2) | 0(2)   | 7(2)  | -9(2)  |
| C(46) | 33(3) | 53(3) | 42(3) | 15(2)  | 11(2) | 9(2)   |
| C(47) | 35(3) | 38(3) | 37(2) | 0(2)   | 5(2)  | -3(2)  |
| C(48) | 23(2) | 40(3) | 28(2) | -3(2)  | 4(2)  | -3(2)  |
| C(49) | 31(3) | 33(3) | 57(3) | -8(2)  | 26(2) | 0(2)   |
| N(6)  | 80(4) | 34(2) | 39(2) | -2(2)  | 31(2) | 12(2)  |
| C(50) | 64(4) | 41(3) | 30(2) | 3(2)   | 3(2)  | -26(3) |
| C(51) | 37(3) | 69(4) | 40(3) | 20(3)  | 19(2) | 4(3)   |
| C(52) | 53(3) | 48(3) | 35(2) | 0(2)   | 21(2) | 22(3)  |
| C(53) | 39(3) | 54(4) | 47(3) | -14(2) | 13(2) | -6(3)  |
| C(54) | 37(3) | 69(4) | 50(3) | 2(3)   | 23(2) | 11(3)  |

**Table S34.** Hydrogen coordinates ( $\times 10^4$ ) and isotropic displacement parameters ( $\text{\AA}^2 \times 10^{-3}$ ) for **5**.

|       | x     | y    | z     | U(eq) |
|-------|-------|------|-------|-------|
| H(2)  | 9626  | 3370 | 2413  | 28    |
| H(3)  | 10145 | 3102 | 1227  | 38    |
| H(4)  | 9966  | 3785 | 29    | 43    |
| H(5)  | 9239  | 4739 | -5    | 35    |
| H(6)  | 8723  | 5021 | 1175  | 25    |
| H(8)  | 6828  | 5957 | 202   | 25    |
| H(9)  | 8110  | 6370 | -93   | 30    |
| H(10) | 9511  | 6600 | 1104  | 31    |
| H(11) | 9652  | 6394 | 2617  | 29    |
| H(12) | 8406  | 5950 | 2924  | 24    |
| H(14) | 4838  | 5959 | 2329  | 25    |
| H(15) | 4700  | 6876 | 3031  | 34    |
| H(16) | 5108  | 6919 | 4628  | 39    |
| H(17) | 5667  | 6028 | 5493  | 40    |
| H(18) | 5773  | 5101 | 4787  | 29    |
| H(20) | 5356  | 2475 | 1617  | 24    |
| H(21) | 5460  | 1632 | 734   | 28    |
| H(22) | 5353  | 1778 | -786  | 28    |
| H(23) | 5118  | 2772 | -1410 | 25    |
| H(24) | 4995  | 3618 | -537  | 20    |
| H(25) | 6277  | 3854 | 4258  | 28    |
| H(26) | 6873  | 3226 | 5541  | 32    |
| H(27) | 7993  | 2471 | 5576  | 30    |
| H(28) | 8322  | 2278 | 4249  | 27    |
| H(31) | 8141  | 1966 | 2916  | 25    |
| H(32) | 8233  | 1772 | 1479  | 24    |
| H(33) | 7773  | 2547 | 358   | 25    |
| H(36) | 7551  | 3294 | -510  | 22    |
| H(37) | 7060  | 4117 | -1553 | 27    |
| H(38) | 6306  | 4966 | -1187 | 26    |
| H(39) | 6147  | 4999 | 227   | 21    |

|       |      |      |      |    |
|-------|------|------|------|----|
| H(40) | 7120 | 5607 | 3795 | 21 |
| H(41) | 8029 | 6097 | 5148 | 32 |
| H(42) | 9234 | 5539 | 6260 | 36 |
| H(43) | 9490 | 4510 | 5950 | 34 |
| H(44) | 8529 | 4057 | 4596 | 29 |
| H(45) | 6472 | 4432 | 6273 | 44 |
| H(46) | 7066 | 5374 | 6906 | 52 |
| H(47) | 8615 | 5422 | 7979 | 47 |
| H(48) | 9499 | 4507 | 8368 | 38 |
| H(49) | 8808 | 3583 | 7703 | 45 |
| H(50) | 9276 | 2650 | 9049 | 58 |
| H(51) | 9647 | 2069 | 7984 | 57 |
| H(52) | 8457 | 1478 | 6930 | 52 |
| H(53) | 6958 | 1488 | 6997 | 57 |
| H(54) | 6681 | 2059 | 8111 | 60 |

---

**Table S35.** Torsion angles [°] for **5**.

|                         |           |                         |           |
|-------------------------|-----------|-------------------------|-----------|
| Th(1)-S(1)-C(1)-C(2)    | -104.4(3) | C(19)-C(20)-C(21)-C(22) | 1.0(6)    |
| Th(1)-S(1)-C(1)-C(6)    | 78.0(3)   | C(20)-C(21)-C(22)-C(23) | -0.4(6)   |
| C(6)-C(1)-C(2)-C(3)     | -1.2(6)   | C(21)-C(22)-C(23)-C(24) | 0.0(6)    |
| S(1)-C(1)-C(2)-C(3)     | -178.8(3) | C(22)-C(23)-C(24)-C(19) | -0.2(6)   |
| C(1)-C(2)-C(3)-C(4)     | 0.7(6)    | C(20)-C(19)-C(24)-C(23) | 0.8(5)    |
| C(2)-C(3)-C(4)-C(5)     | -0.4(7)   | S(4)-C(19)-C(24)-C(23)  | -177.8(3) |
| C(3)-C(4)-C(5)-C(6)     | 0.6(6)    | C(29)-N(1)-C(25)-C(26)  | 2.6(6)    |
| C(4)-C(5)-C(6)-C(1)     | -1.1(6)   | Th(1)-N(1)-C(25)-C(26)  | -157.0(3) |
| C(2)-C(1)-C(6)-C(5)     | 1.4(6)    | N(1)-C(25)-C(26)-C(27)  | 2.4(6)    |
| S(1)-C(1)-C(6)-C(5)     | 179.0(3)  | C(25)-C(26)-C(27)-C(28) | -4.7(6)   |
| Th(1)-S(2)-C(7)-C(12)   | -76.2(3)  | C(26)-C(27)-C(28)-C(29) | 2.1(6)    |
| Th(1)-S(2)-C(7)-C(8)    | 108.1(3)  | C(25)-N(1)-C(29)-C(28)  | -5.4(5)   |
| C(12)-C(7)-C(8)-C(9)    | 1.3(5)    | Th(1)-N(1)-C(29)-C(28)  | 154.8(3)  |
| S(2)-C(7)-C(8)-C(9)     | 177.1(3)  | C(25)-N(1)-C(29)-C(30)  | 172.3(3)  |
| C(7)-C(8)-C(9)-C(10)    | -1.7(6)   | Th(1)-N(1)-C(29)-C(30)  | -27.5(4)  |
| C(8)-C(9)-C(10)-C(11)   | 0.7(6)    | C(27)-C(28)-C(29)-N(1)  | 3.1(6)    |
| C(9)-C(10)-C(11)-C(12)  | 0.6(6)    | C(27)-C(28)-C(29)-C(30) | -174.4(4) |
| C(10)-C(11)-C(12)-C(7)  | -0.9(6)   | C(34)-N(2)-C(30)-C(31)  | -1.8(5)   |
| C(8)-C(7)-C(12)-C(11)   | -0.1(6)   | Th(1)-N(2)-C(30)-C(31)  | -178.1(3) |
| S(2)-C(7)-C(12)-C(11)   | -175.8(3) | C(34)-N(2)-C(30)-C(29)  | -179.4(3) |
| Th(1)-S(3)-C(13)-C(14)  | 84.1(3)   | Th(1)-N(2)-C(30)-C(29)  | 4.3(4)    |
| Th(1)-S(3)-C(13)-C(18)  | -101.5(3) | N(1)-C(29)-C(30)-N(2)   | 15.4(5)   |
| C(18)-C(13)-C(14)-C(15) | -2.8(6)   | C(28)-C(29)-C(30)-N(2)  | -166.9(3) |
| S(3)-C(13)-C(14)-C(15)  | 171.8(3)  | N(1)-C(29)-C(30)-C(31)  | -162.3(3) |
| C(13)-C(14)-C(15)-C(16) | 1.6(6)    | C(28)-C(29)-C(30)-C(31) | 15.4(5)   |
| C(14)-C(15)-C(16)-C(17) | 0.5(6)    | N(2)-C(30)-C(31)-C(32)  | -0.7(6)   |
| C(15)-C(16)-C(17)-C(18) | -1.3(7)   | C(29)-C(30)-C(31)-C(32) | 176.9(3)  |
| C(16)-C(17)-C(18)-C(13) | 0.1(6)    | C(30)-C(31)-C(32)-C(33) | 1.2(6)    |
| C(14)-C(13)-C(18)-C(17) | 1.9(6)    | C(31)-C(32)-C(33)-C(34) | 0.6(6)    |
| S(3)-C(13)-C(18)-C(17)  | -172.6(3) | C(30)-N(2)-C(34)-C(33)  | 3.7(5)    |
| Th(1)-S(4)-C(19)-C(20)  | 88.7(3)   | Th(1)-N(2)-C(34)-C(33)  | 179.9(3)  |
| Th(1)-S(4)-C(19)-C(24)  | -92.8(3)  | C(30)-N(2)-C(34)-C(35)  | -177.9(3) |
| C(24)-C(19)-C(20)-C(21) | -1.2(6)   | Th(1)-N(2)-C(34)-C(35)  | -1.6(4)   |
| S(4)-C(19)-C(20)-C(21)  | 177.3(3)  | C(32)-C(33)-C(34)-N(2)  | -3.2(6)   |

|                         |           |                         |          |
|-------------------------|-----------|-------------------------|----------|
| C(32)-C(33)-C(34)-C(35) | 178.5(3)  | N(4)-C(40)-C(41)-C(42)  | 0.0(6)   |
| C(39)-N(3)-C(35)-C(36)  | 5.0(5)    | C(40)-C(41)-C(42)-C(43) | 0.5(6)   |
| Th(1)-N(3)-C(35)-C(36)  | -172.6(2) | C(41)-C(42)-C(43)-C(44) | -1.1(6)  |
| C(39)-N(3)-C(35)-C(34)  | -174.4(3) | C(40)-N(4)-C(44)-C(43)  | -0.9(6)  |
| Th(1)-N(3)-C(35)-C(34)  | 8.0(4)    | Th(1)-N(4)-C(44)-C(43)  | 171.1(3) |
| N(2)-C(34)-C(35)-N(3)   | -4.1(5)   | C(42)-C(43)-C(44)-N(4)  | 1.4(6)   |
| C(33)-C(34)-C(35)-N(3)  | 174.3(3)  | C(49)-N(5)-C(45)-C(46)  | -1.2(7)  |
| N(2)-C(34)-C(35)-C(36)  | 176.5(3)  | N(5)-C(45)-C(46)-C(47)  | 1.0(7)   |
| C(33)-C(34)-C(35)-C(36) | -5.1(5)   | C(45)-C(46)-C(47)-C(48) | 0.0(7)   |
| N(3)-C(35)-C(36)-C(37)  | -1.8(5)   | C(46)-C(47)-C(48)-C(49) | -0.7(7)  |
| C(34)-C(35)-C(36)-C(37) | 177.6(3)  | C(45)-N(5)-C(49)-C(48)  | 0.4(6)   |
| C(35)-C(36)-C(37)-C(38) | -1.9(6)   | C(47)-C(48)-C(49)-N(5)  | 0.5(7)   |
| C(36)-C(37)-C(38)-C(39) | 2.4(6)    | C(54)-N(6)-C(50)-C(51)  | -1.0(7)  |
| C(35)-N(3)-C(39)-C(38)  | -4.6(5)   | N(6)-C(50)-C(51)-C(52)  | 1.1(8)   |
| Th(1)-N(3)-C(39)-C(38)  | 173.0(3)  | C(50)-C(51)-C(52)-C(53) | -0.2(7)  |
| C(37)-C(38)-C(39)-N(3)  | 0.9(6)    | C(51)-C(52)-C(53)-C(54) | -0.7(8)  |
| C(44)-N(4)-C(40)-C(41)  | 0.2(5)    | C(50)-N(6)-C(54)-C(53)  | -0.1(8)  |
| Th(1)-N(4)-C(40)-C(41)  | -172.4(3) | C(52)-C(53)-C(54)-N(6)  | 0.9(9)   |

---



**Table S36.** Hydrogen bonds [ $\text{\AA}$  and  $^\circ$ ] for **5**.

| D-H...A              | d(D-H) | d(H...A) | d(D...A) | $\angle(\text{DHA})$ |
|----------------------|--------|----------|----------|----------------------|
| C(8)-H(8)...S(4)#1   | 0.95   | 2.99     | 3.885(4) | 158.0                |
| C(14)-H(14)...S(2)   | 0.95   | 2.99     | 3.455(4) | 111.5                |
| C(24)-H(24)...S(2)#1 | 0.95   | 2.97     | 3.748(4) | 140.3                |
| C(25)-H(25)...S(3)   | 0.95   | 2.80     | 3.518(4) | 132.9                |
| C(26)-H(26)...N(5)   | 0.95   | 2.55     | 3.247(5) | 130.3                |
| C(31)-H(31)...S(2)#2 | 0.95   | 2.97     | 3.755(4) | 140.5                |
| C(36)-H(36)...N(6)#3 | 0.95   | 2.48     | 3.402(5) | 164.3                |
| C(38)-H(38)...S(3)#1 | 0.95   | 2.97     | 3.765(4) | 142.4                |
| C(39)-H(39)...S(2)   | 0.95   | 2.74     | 3.432(4) | 130.6                |
| C(40)-H(40)...S(2)   | 0.95   | 2.85     | 3.545(3) | 131.0                |

Symmetry transformations used to generate equivalent atoms:

#1  $-x+1, -y+1, -z$  #2  $-x+3/2, y-1/2, -z+1/2$  #3  $x, y, z-1$

8. Crystal structure unit cell packing diagrams for 1-5.

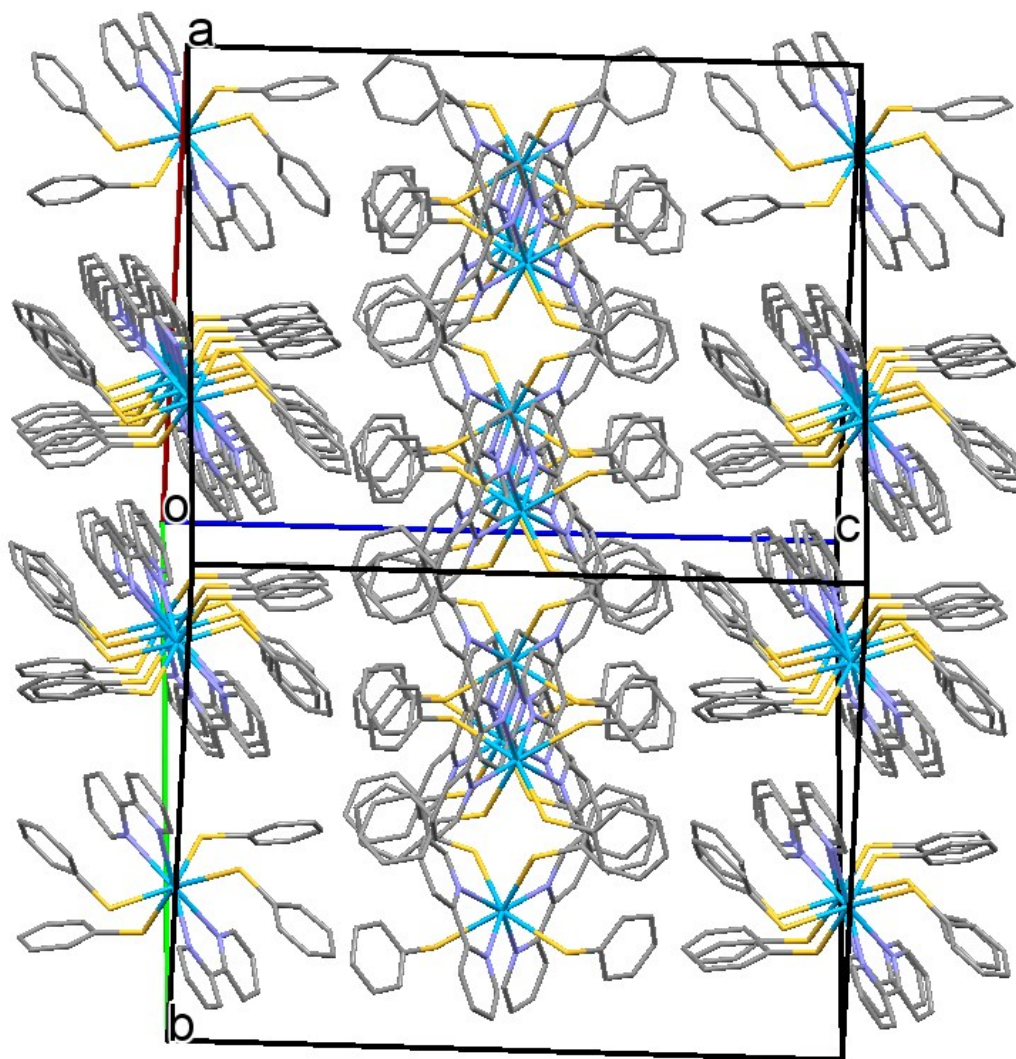

Figure S22. Unit cell packing viewed along the crystallographic  $(a+b)$ -axis for  $(bipy)_2Th(SPh)_4$  (1).

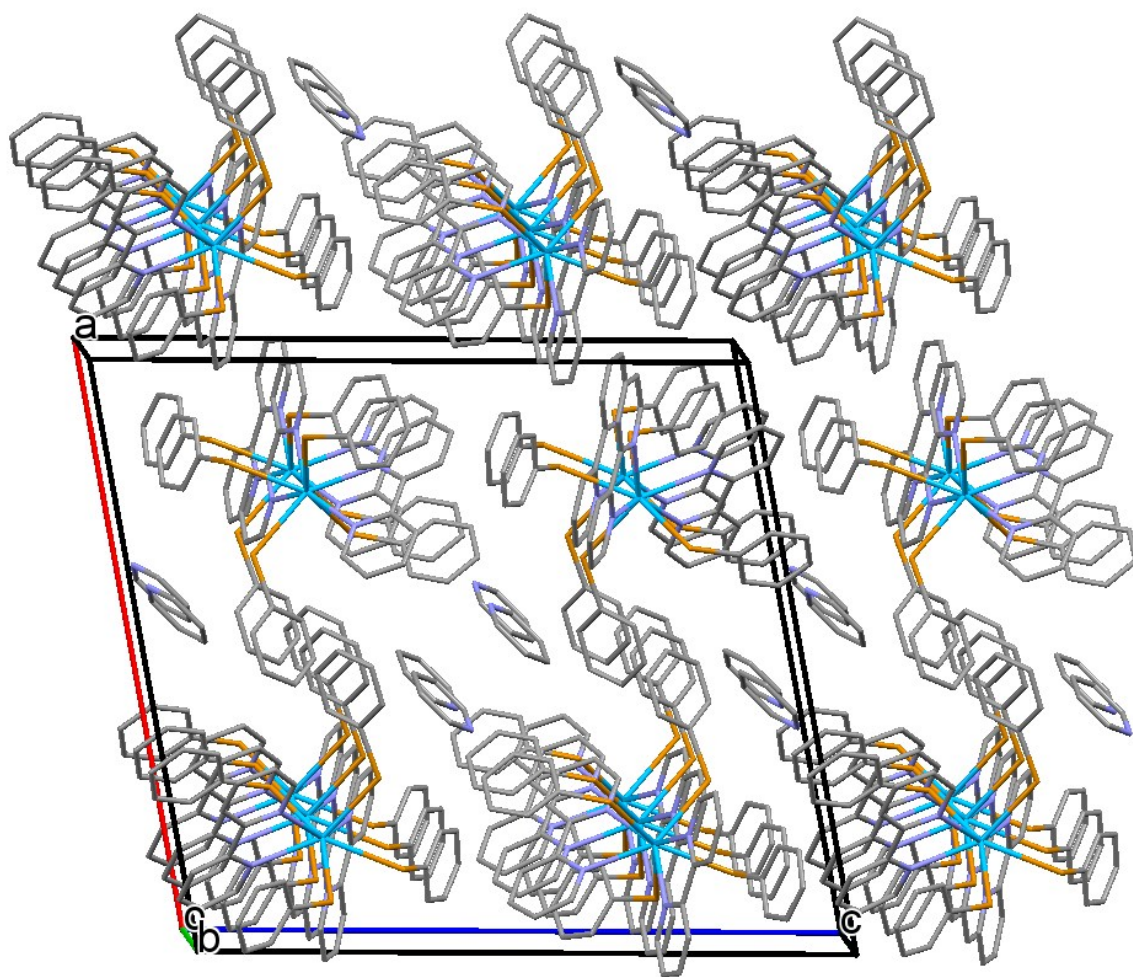

Figure S23. Unit cell packing viewed along the crystallographic **b**-axis for  $(bipy)_2Th(SePh)_4 \cdot py$  (2).

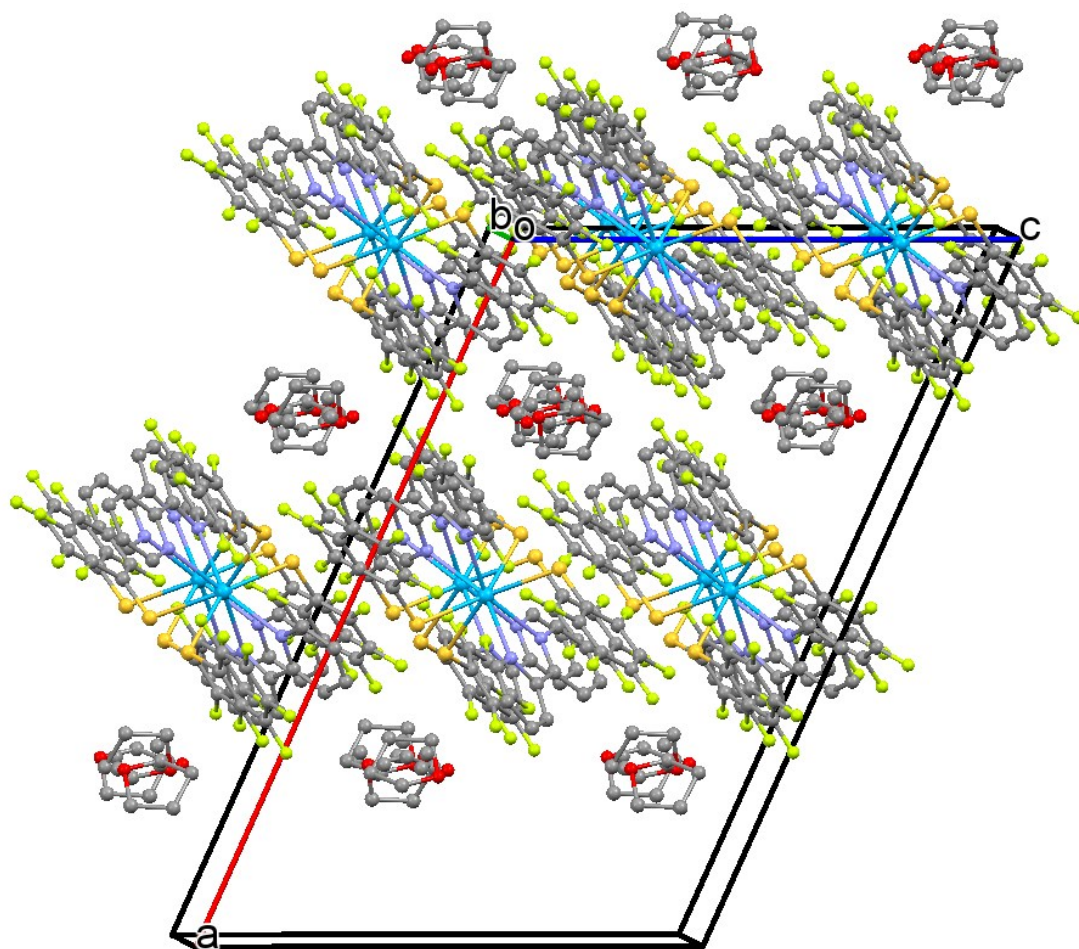

Figure S24. Unit cell packing viewed along the crystallographic **b**-axis for **(bipy)<sub>2</sub>Th(SC<sub>6</sub>F<sub>5</sub>)<sub>4</sub>·2THF (3)**. Note that the crystal packing of the isomorphous **(bipy)<sub>2</sub>Th(SeC<sub>6</sub>F<sub>5</sub>)<sub>4</sub>·2THF (4)** is equivalent to that of **(3)**.

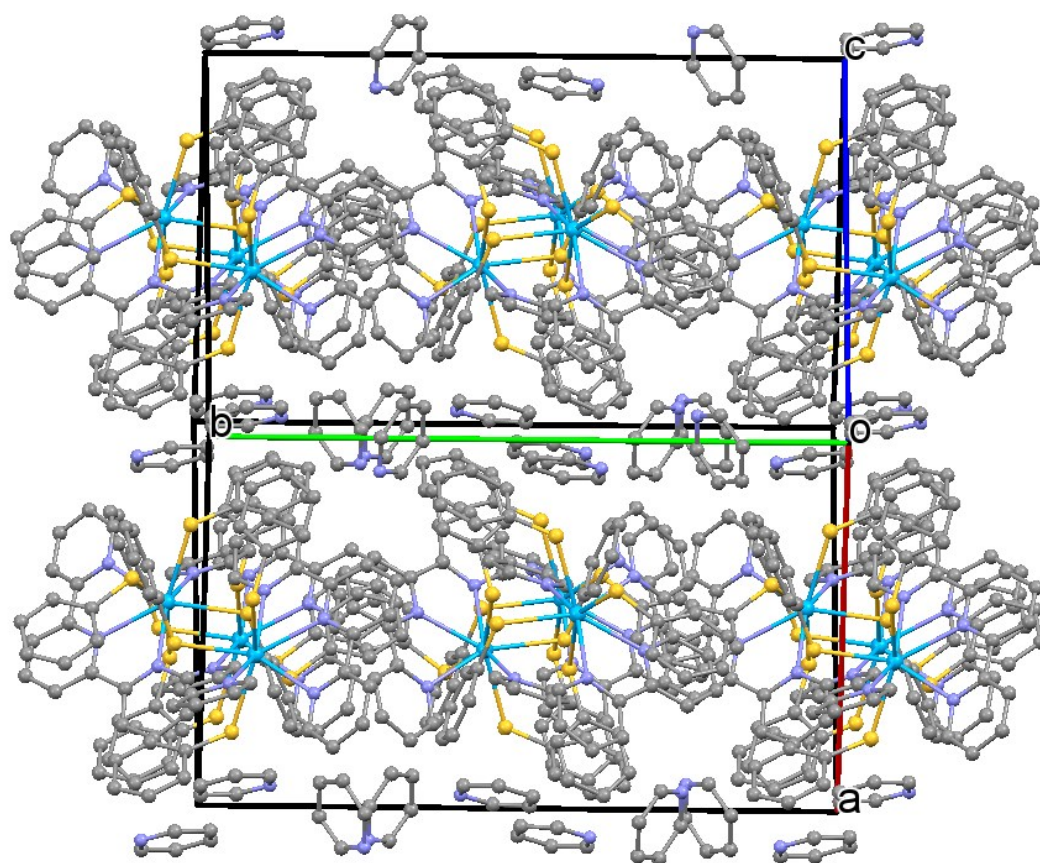

Figure S25. Unit cell packing viewed along the crystallographic (a+c)-axis for (py)(terpy)Th(SPh)<sub>4</sub> · 2py (5).

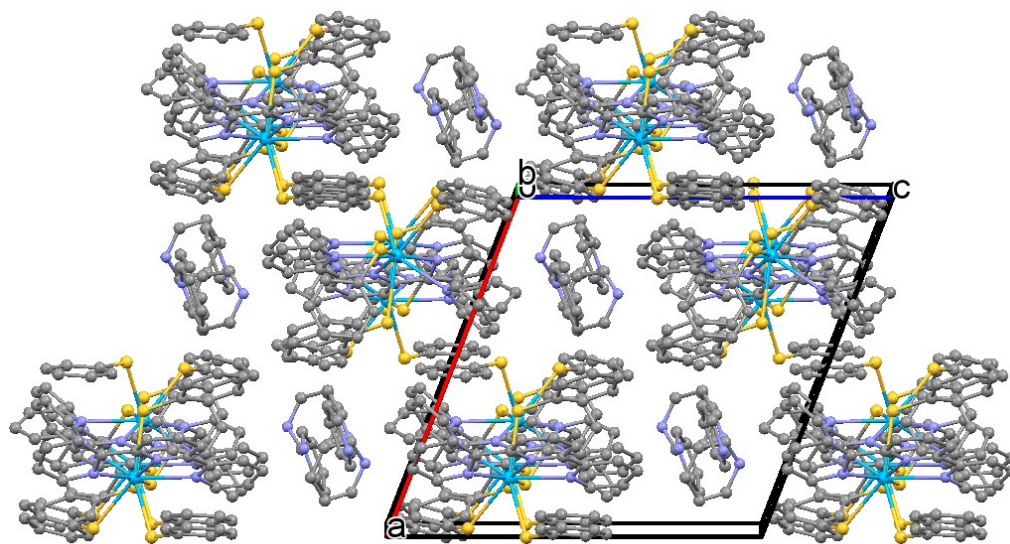

Figure S26. Unit cell packing viewed along the crystallographic **b**-axis for **(py)(terpy)Th(SPh)<sub>4</sub> · 2py (5)**.

9. Intra- and inter-molecular  $\pi\cdots\pi$  interaction motifs for 1-5.

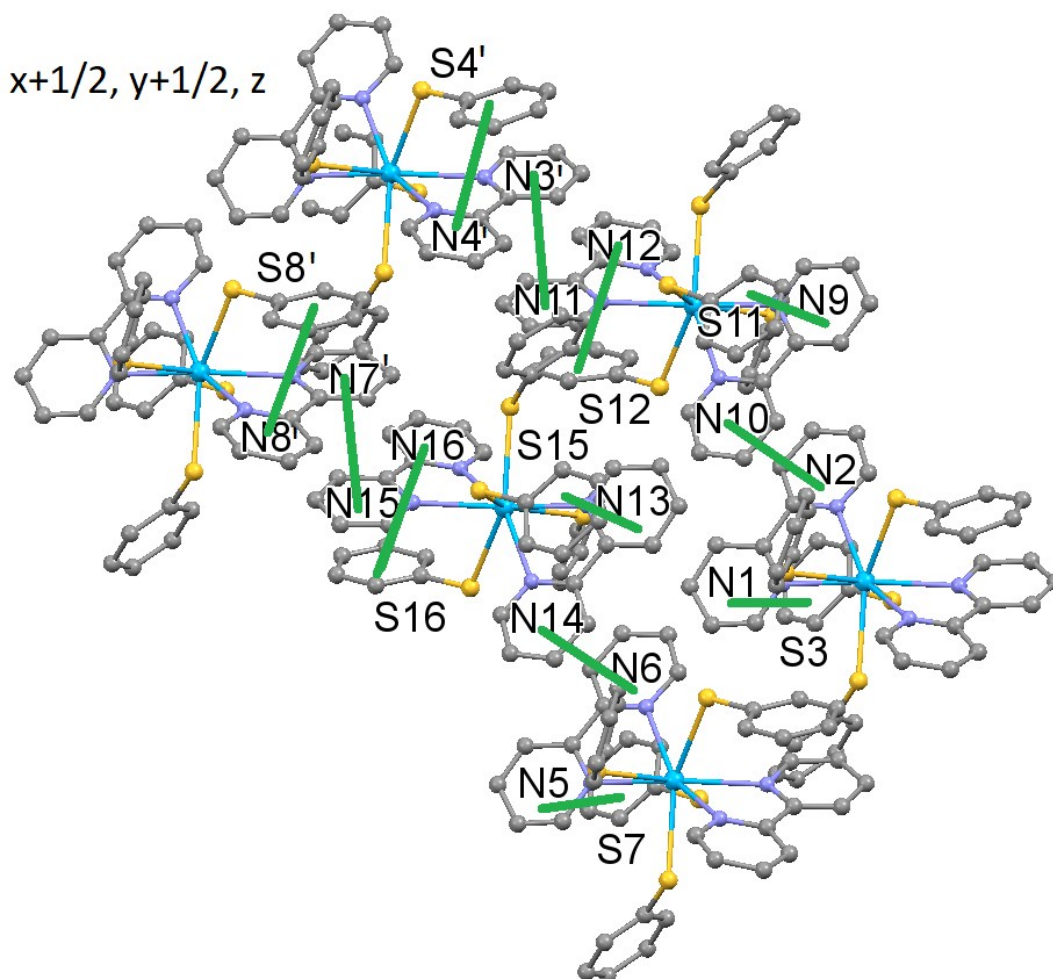

Figure S27. The intra- and inter-molecular  $\pi\cdots\pi$  interactions in  $(\text{bipy})_2\text{Th}(\text{SPh})_4$  (1). Green lines are drawn to show the pairs of rings having the  $\pi\cdots\pi$  interactions listed in Table 1. Primed labels are for atoms related by the C-centering symmetry operation  $x+1/2, y+1/2, z$ .

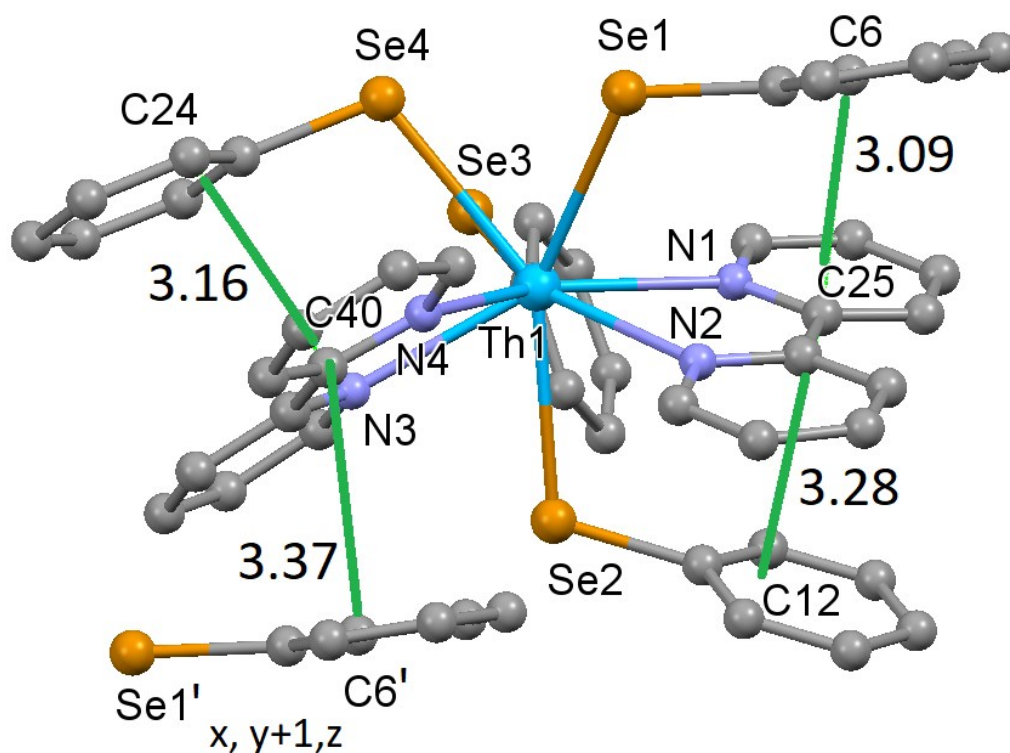

Figure S28. The intra- and inter-molecular  $\pi \dots \pi$  interactions in **(bipy)<sub>2</sub>Th(SePh)<sub>4</sub>·py (2)**. Green lines are drawn to show the pairs of rings having the  $\pi \dots \pi$  interactions listed in Table 1. Primed labels are for atoms related by the translation (*y*) symmetry operation *x*, *y*+1, *z*.



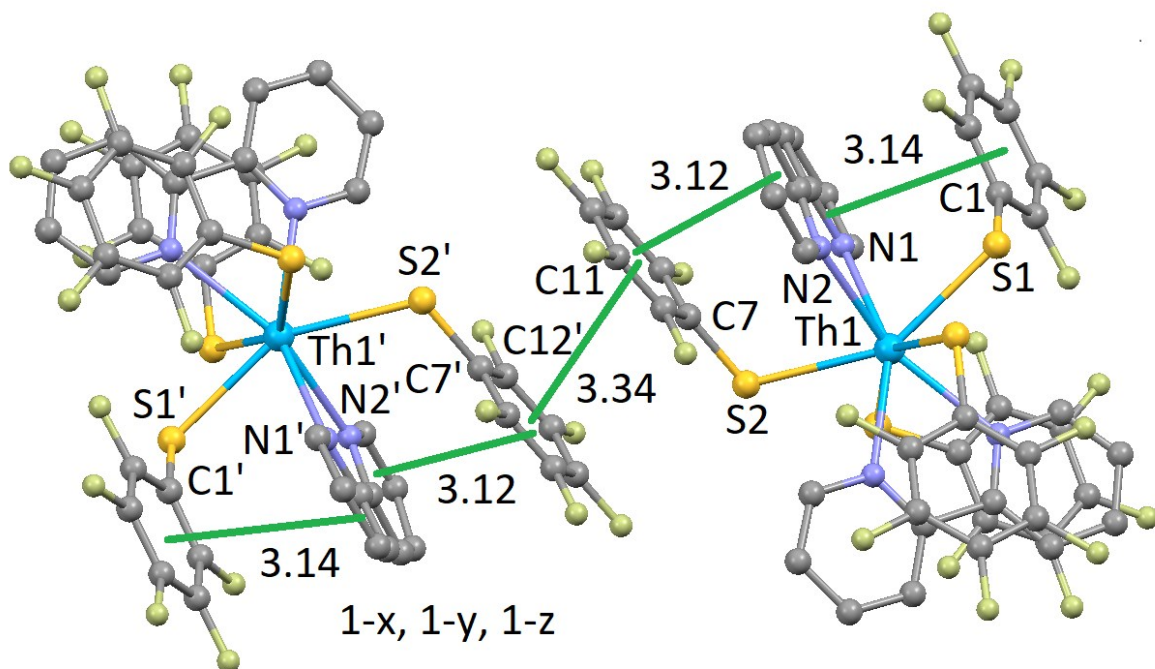

Figure S29. The intra- and inter-molecular  $\pi \dots \pi$  interactions in  **$(\text{bipy})_2\text{Th}(\text{SC}_6\text{F}_5)_4 \cdot 2\text{THF}$  (3)**. Green lines are drawn to show the pairs of rings having the  $\pi \dots \pi$  interactions listed in Table 1. Primed labels are for atoms related by inversion/translation symmetry operation  $1-x, 1-y, 1-z$ .

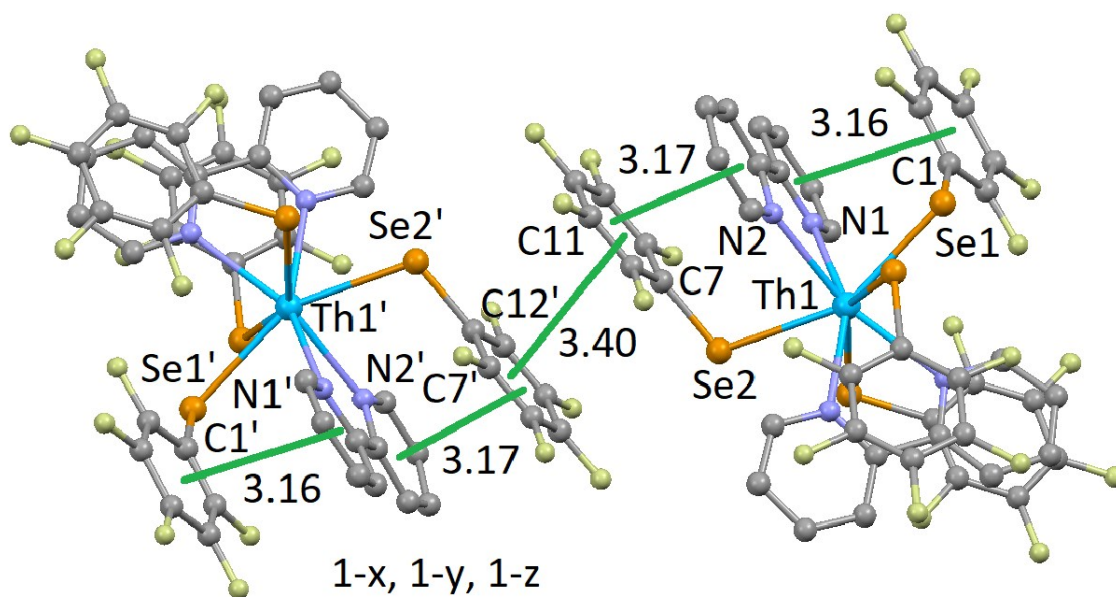

Figure S30. The intra- and inter-molecular  $\pi \dots \pi$  interactions in **(bipy)<sub>2</sub>Th(SeC<sub>6</sub>F<sub>5</sub>)<sub>4</sub>·2THF (4)**. Green lines are drawn to show the pairs of rings having the  $\pi \dots \pi$  interactions listed in Table 1. Primed labels are for atoms related by inversion/translation symmetry operation 1-x, 1-y, 1-z.

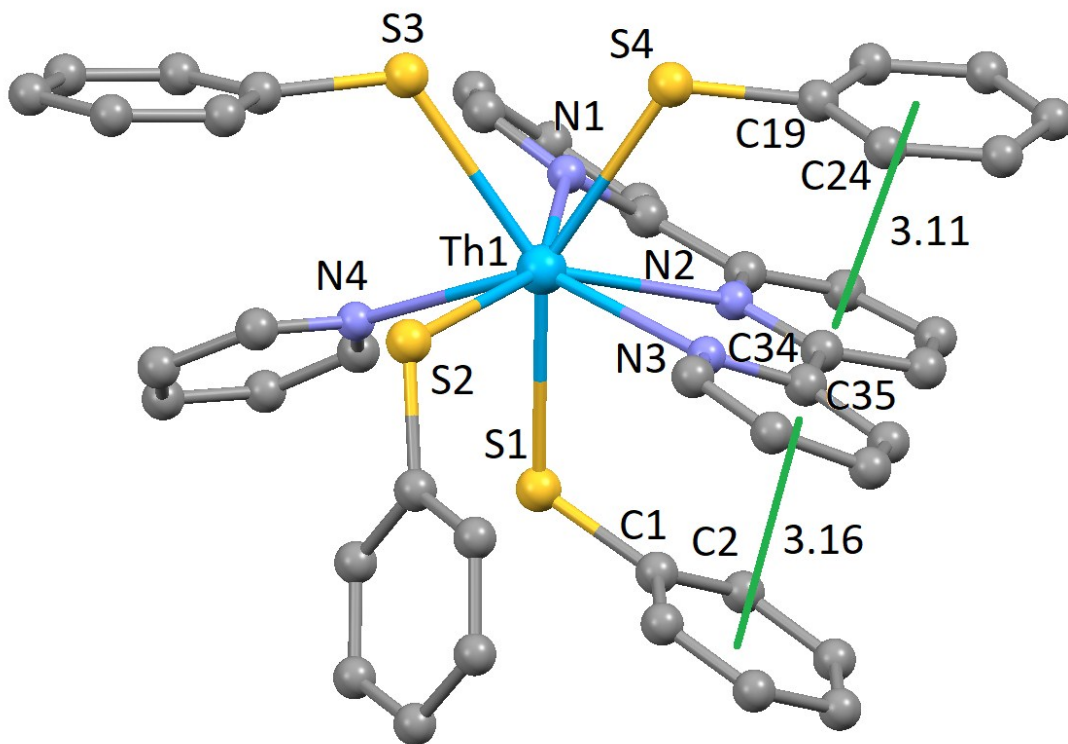

Figure S31. The intra-molecular  $\pi\cdots\pi$  interactions in **(py)(terpy)Th(SPh)<sub>4</sub>·2py (5)**. Green lines are drawn to show the pairs of rings having the  $\pi\cdots\pi$  interactions listed in Table 1. Unlike **1 – 4**, there are no significant intermolecular  $\pi\cdots\pi$  interactions in **5**.
